# Supplementary material
Source: PubMed Central journal article supplement (PMC5583000)

C alpha RMSD: ang\_A104T vs WT

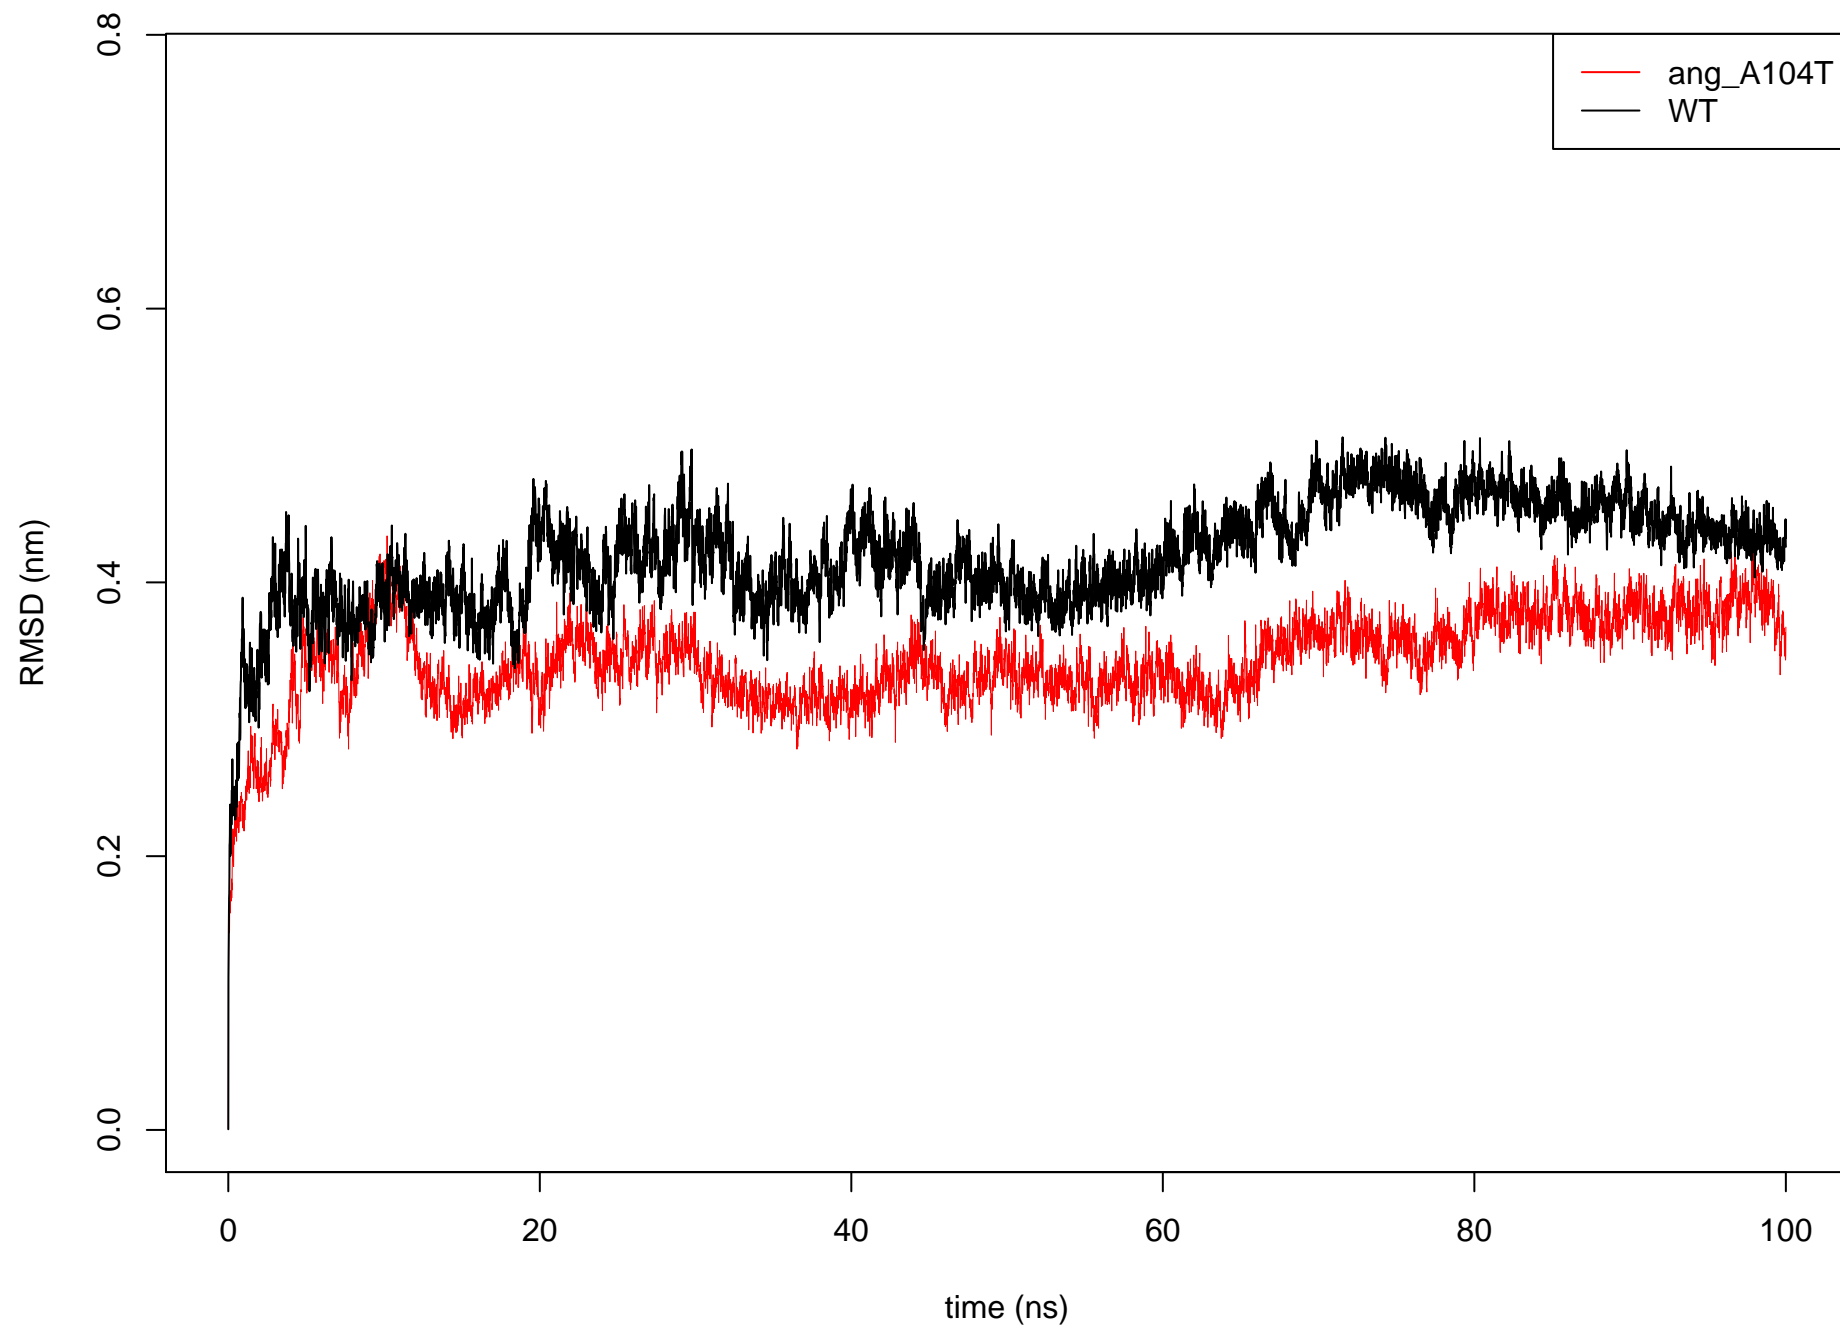

C alpha RMSD: ang\_D168Y vs WT

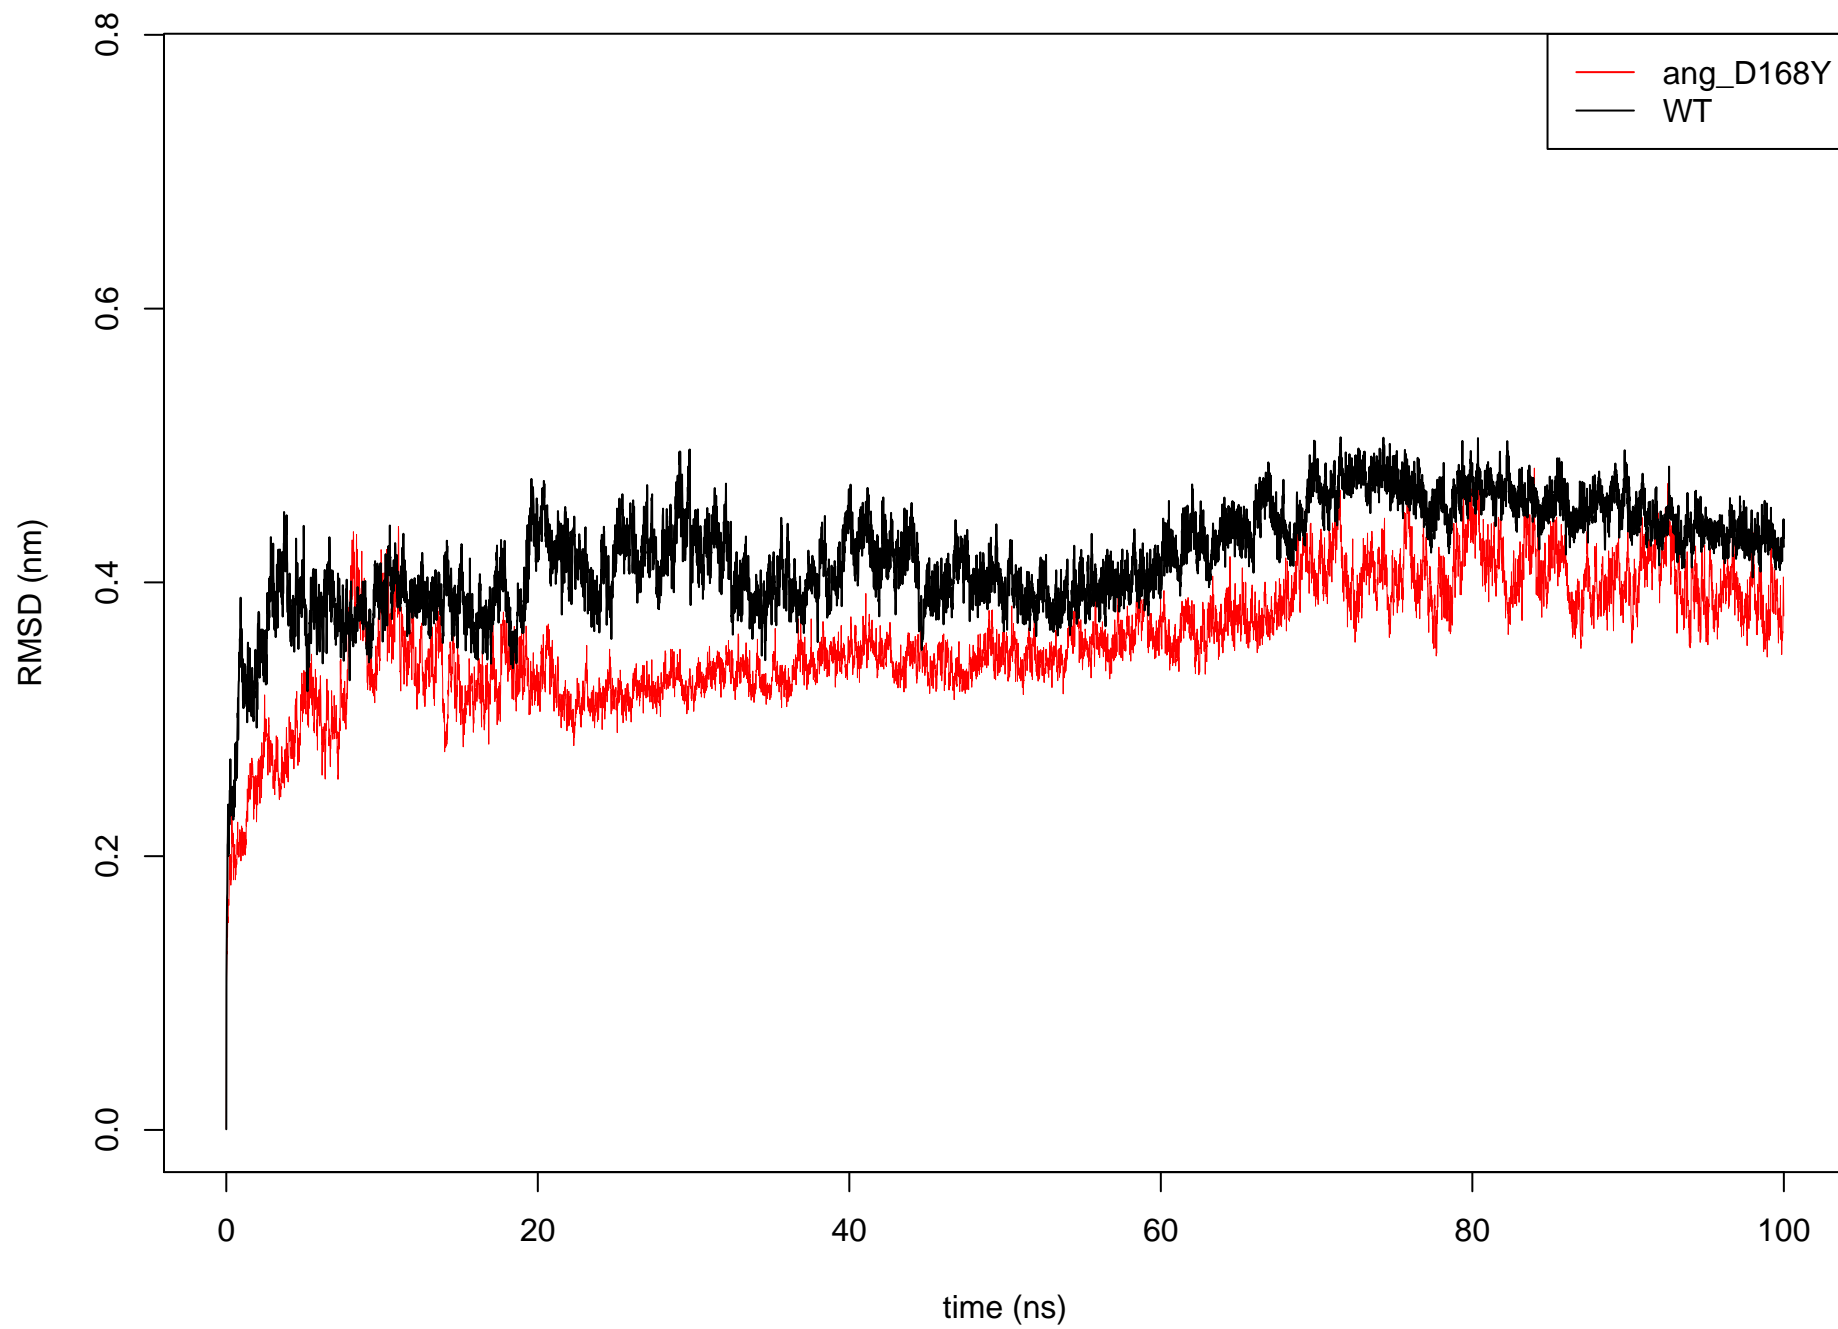

C alpha RMSD: ang\_E48K vs WT

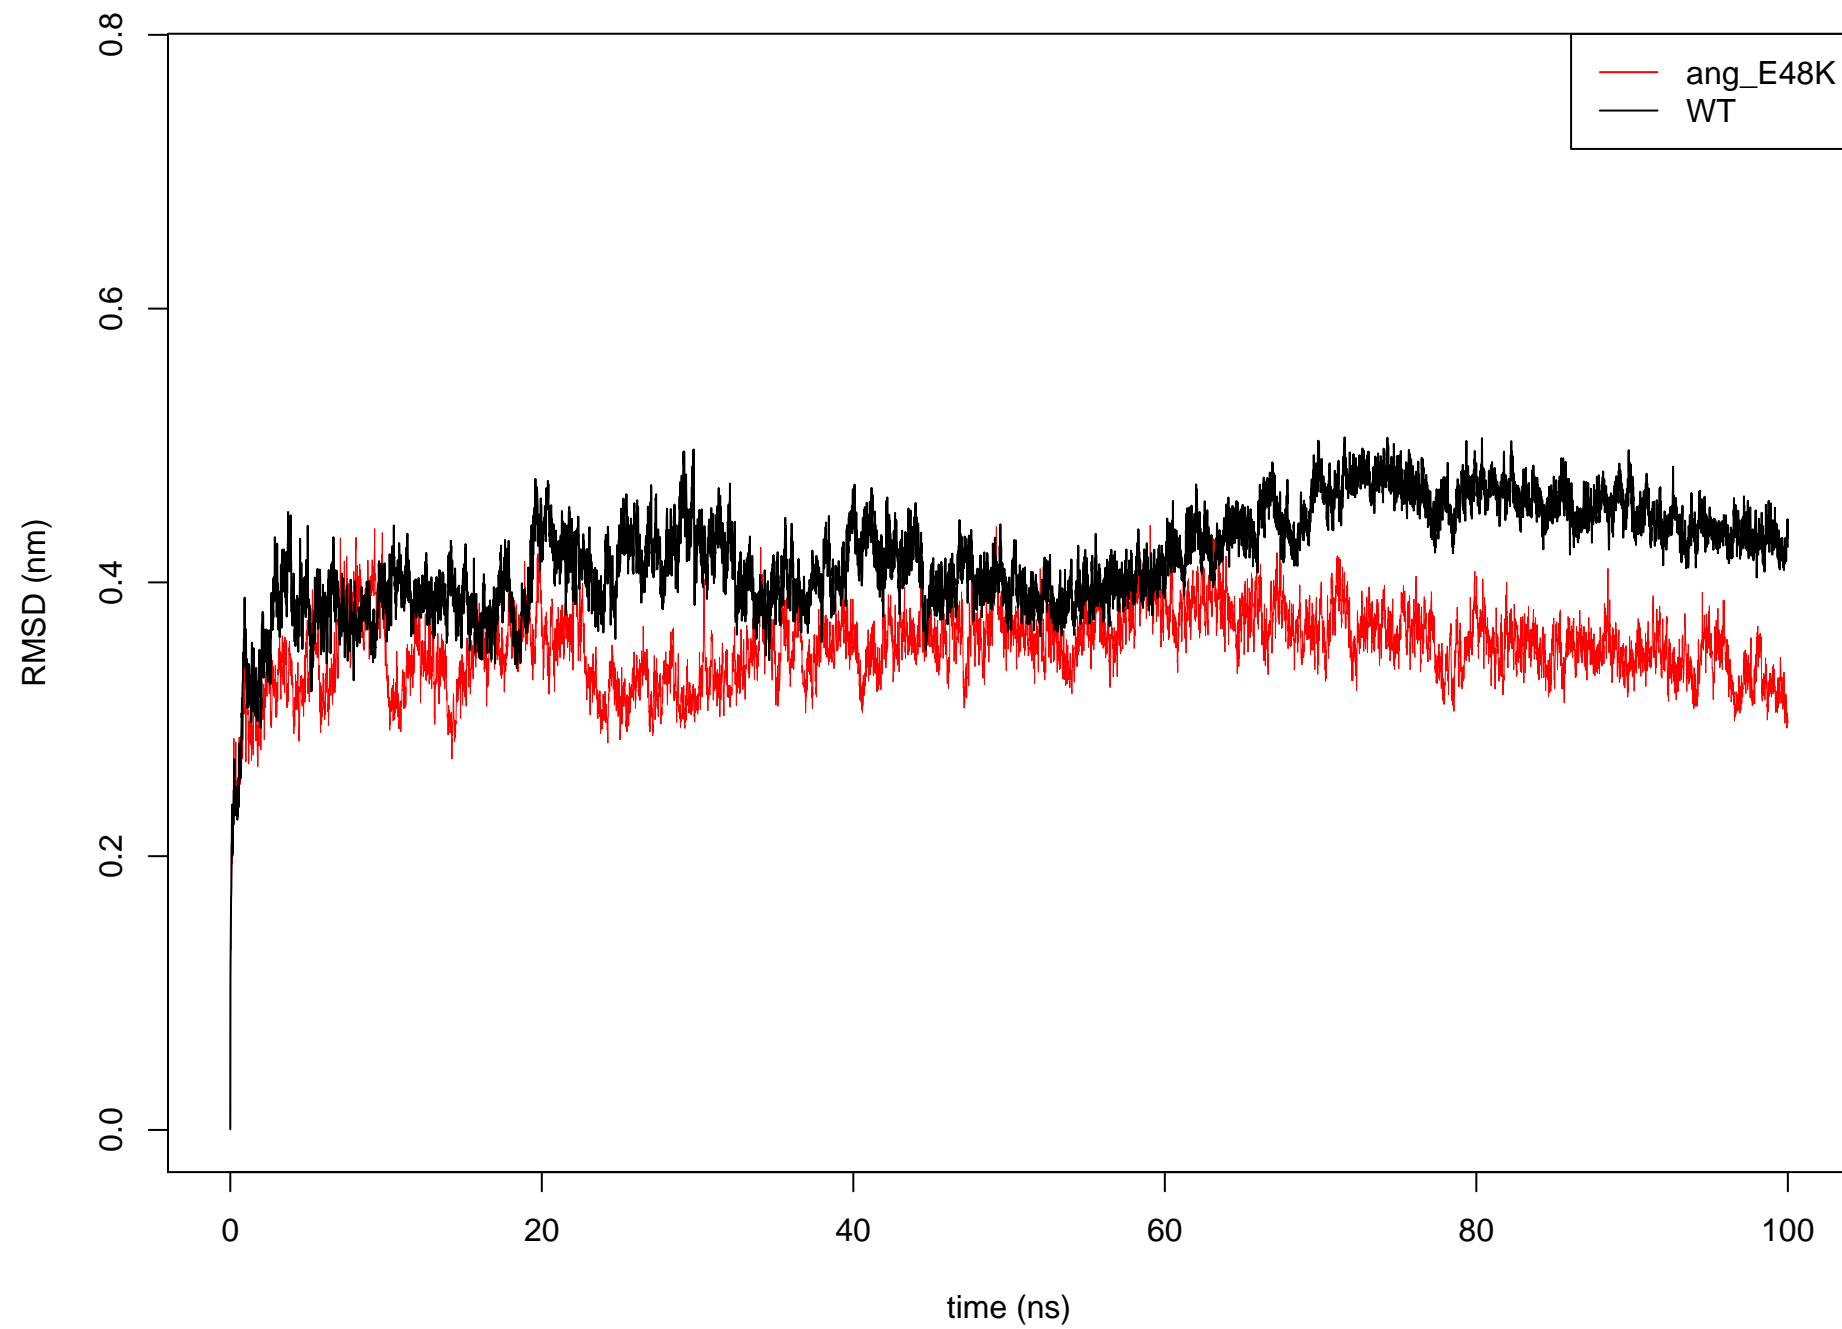

C alpha RMSD: ang\_H39R vs WT

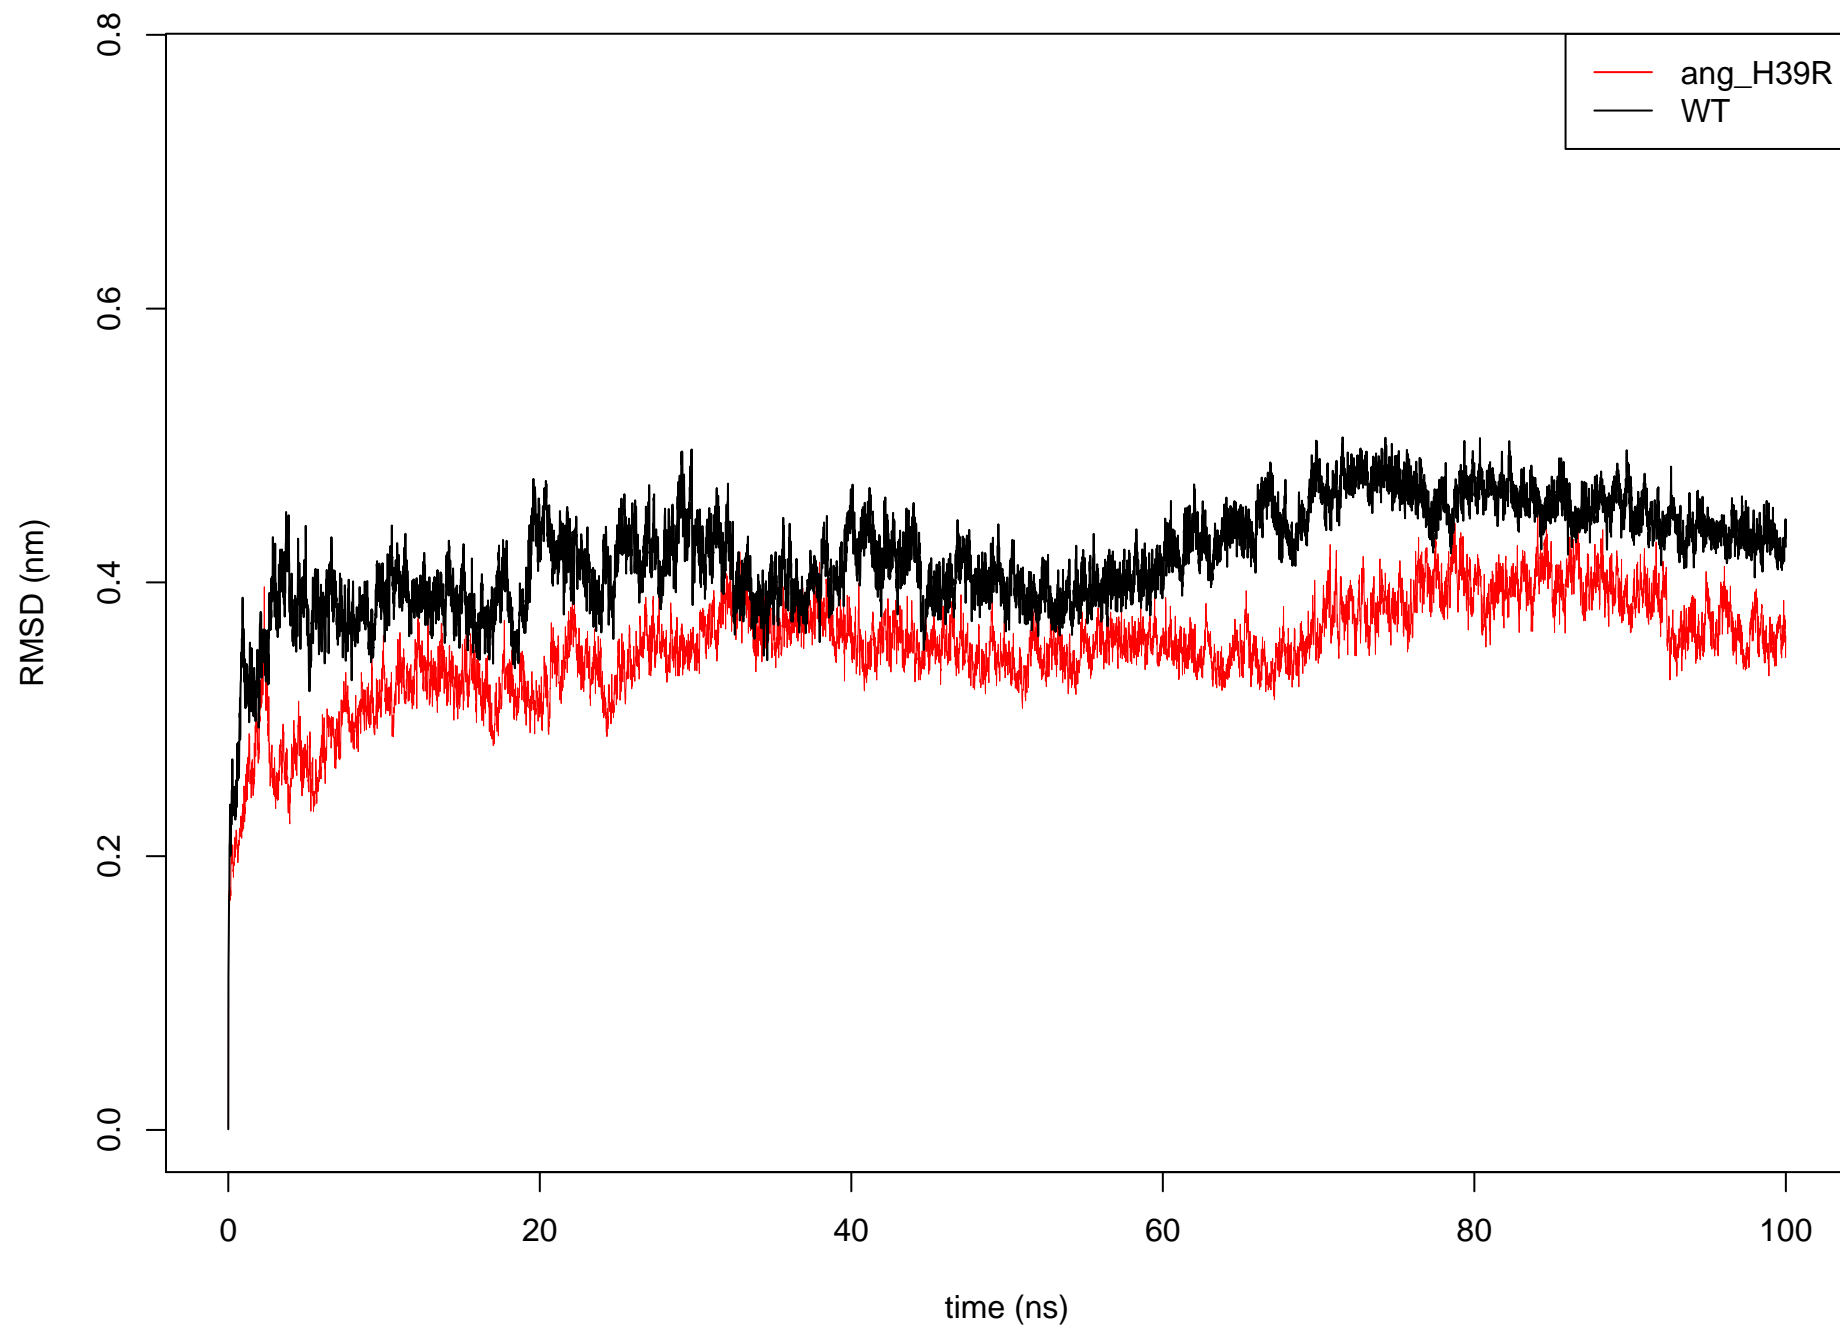

C alpha RMSD: ang\_L43F vs WT

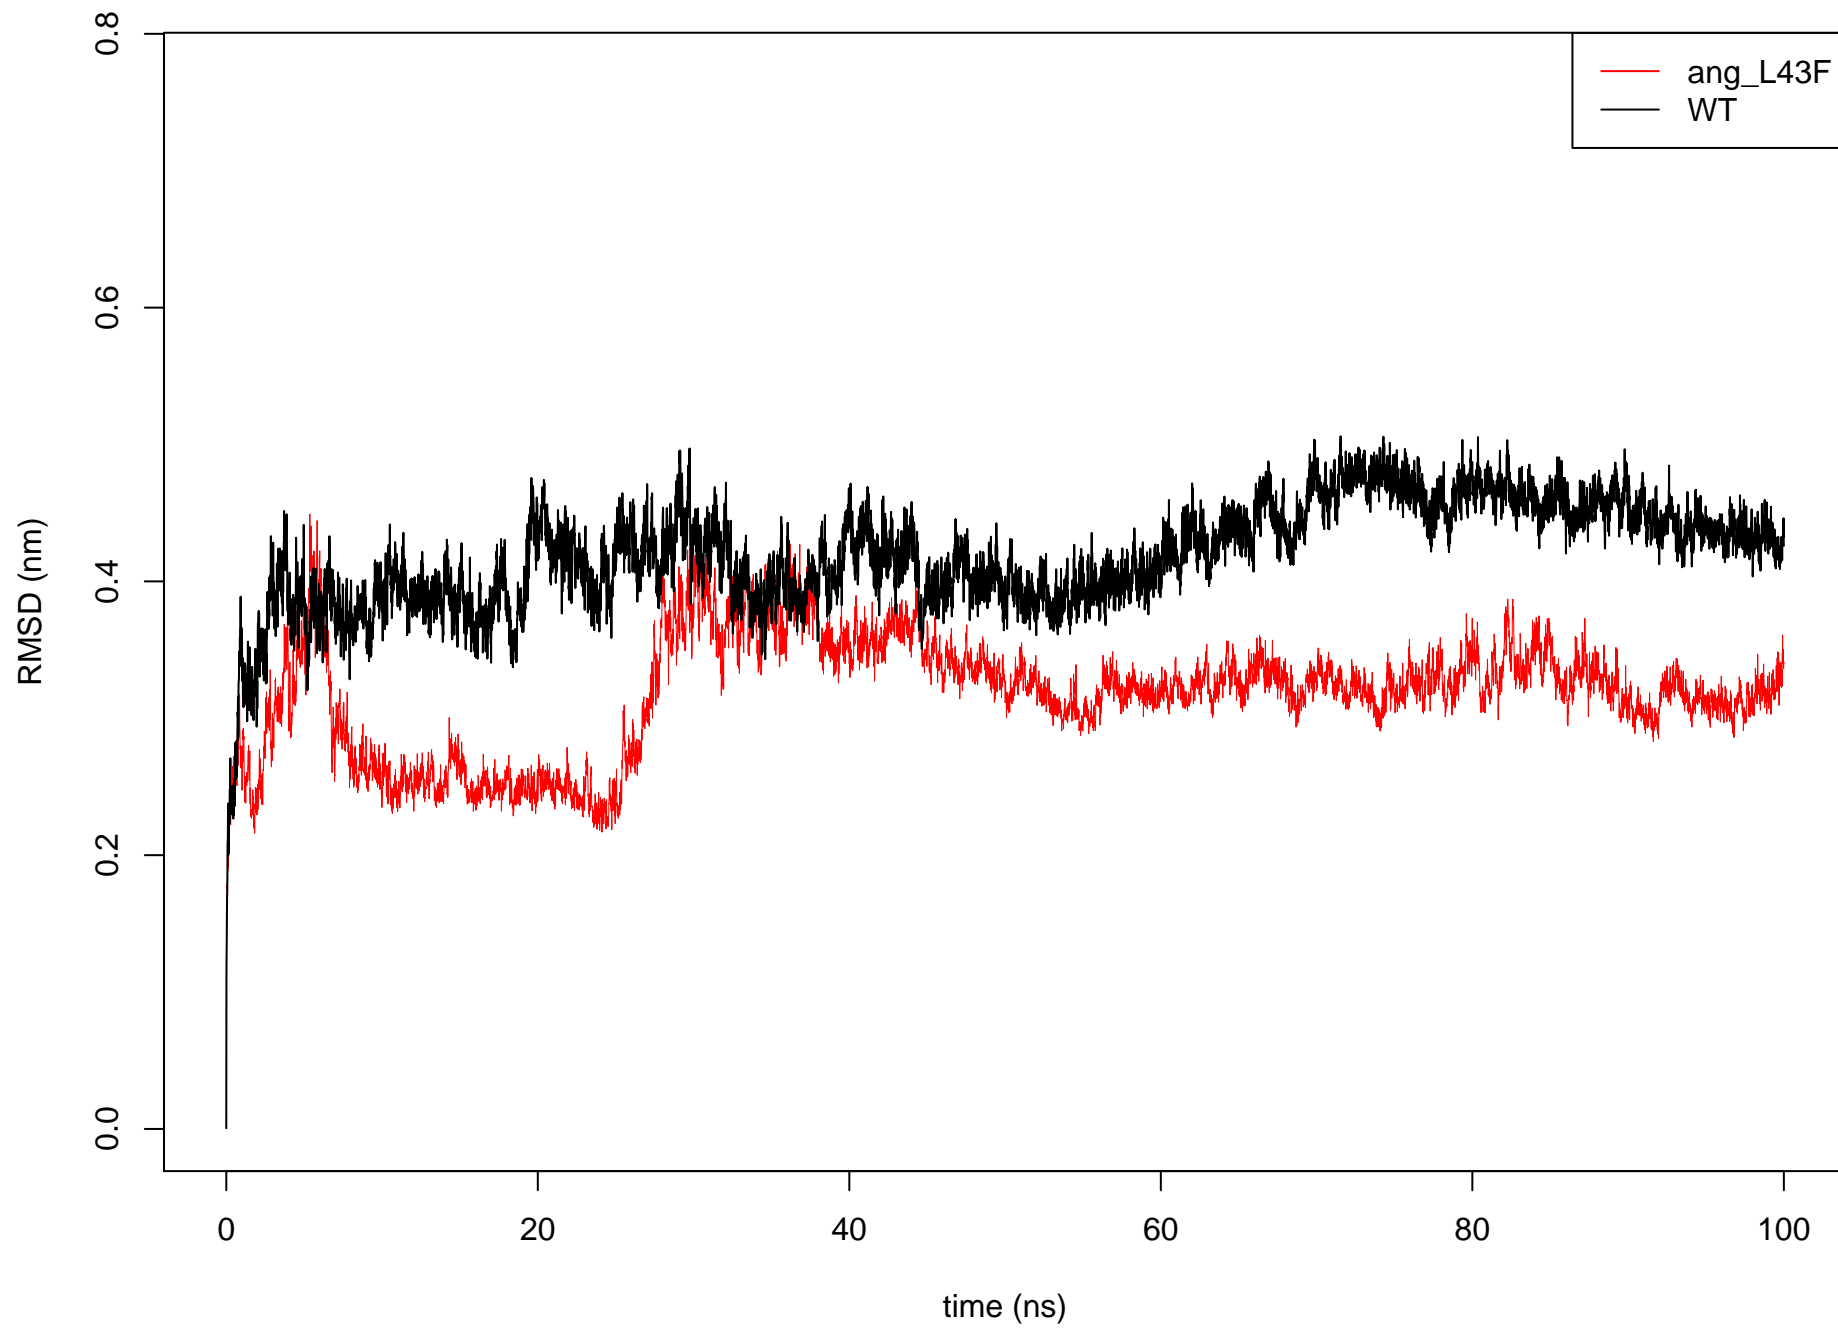

C alpha RMSD: ang\_M105V vs WT

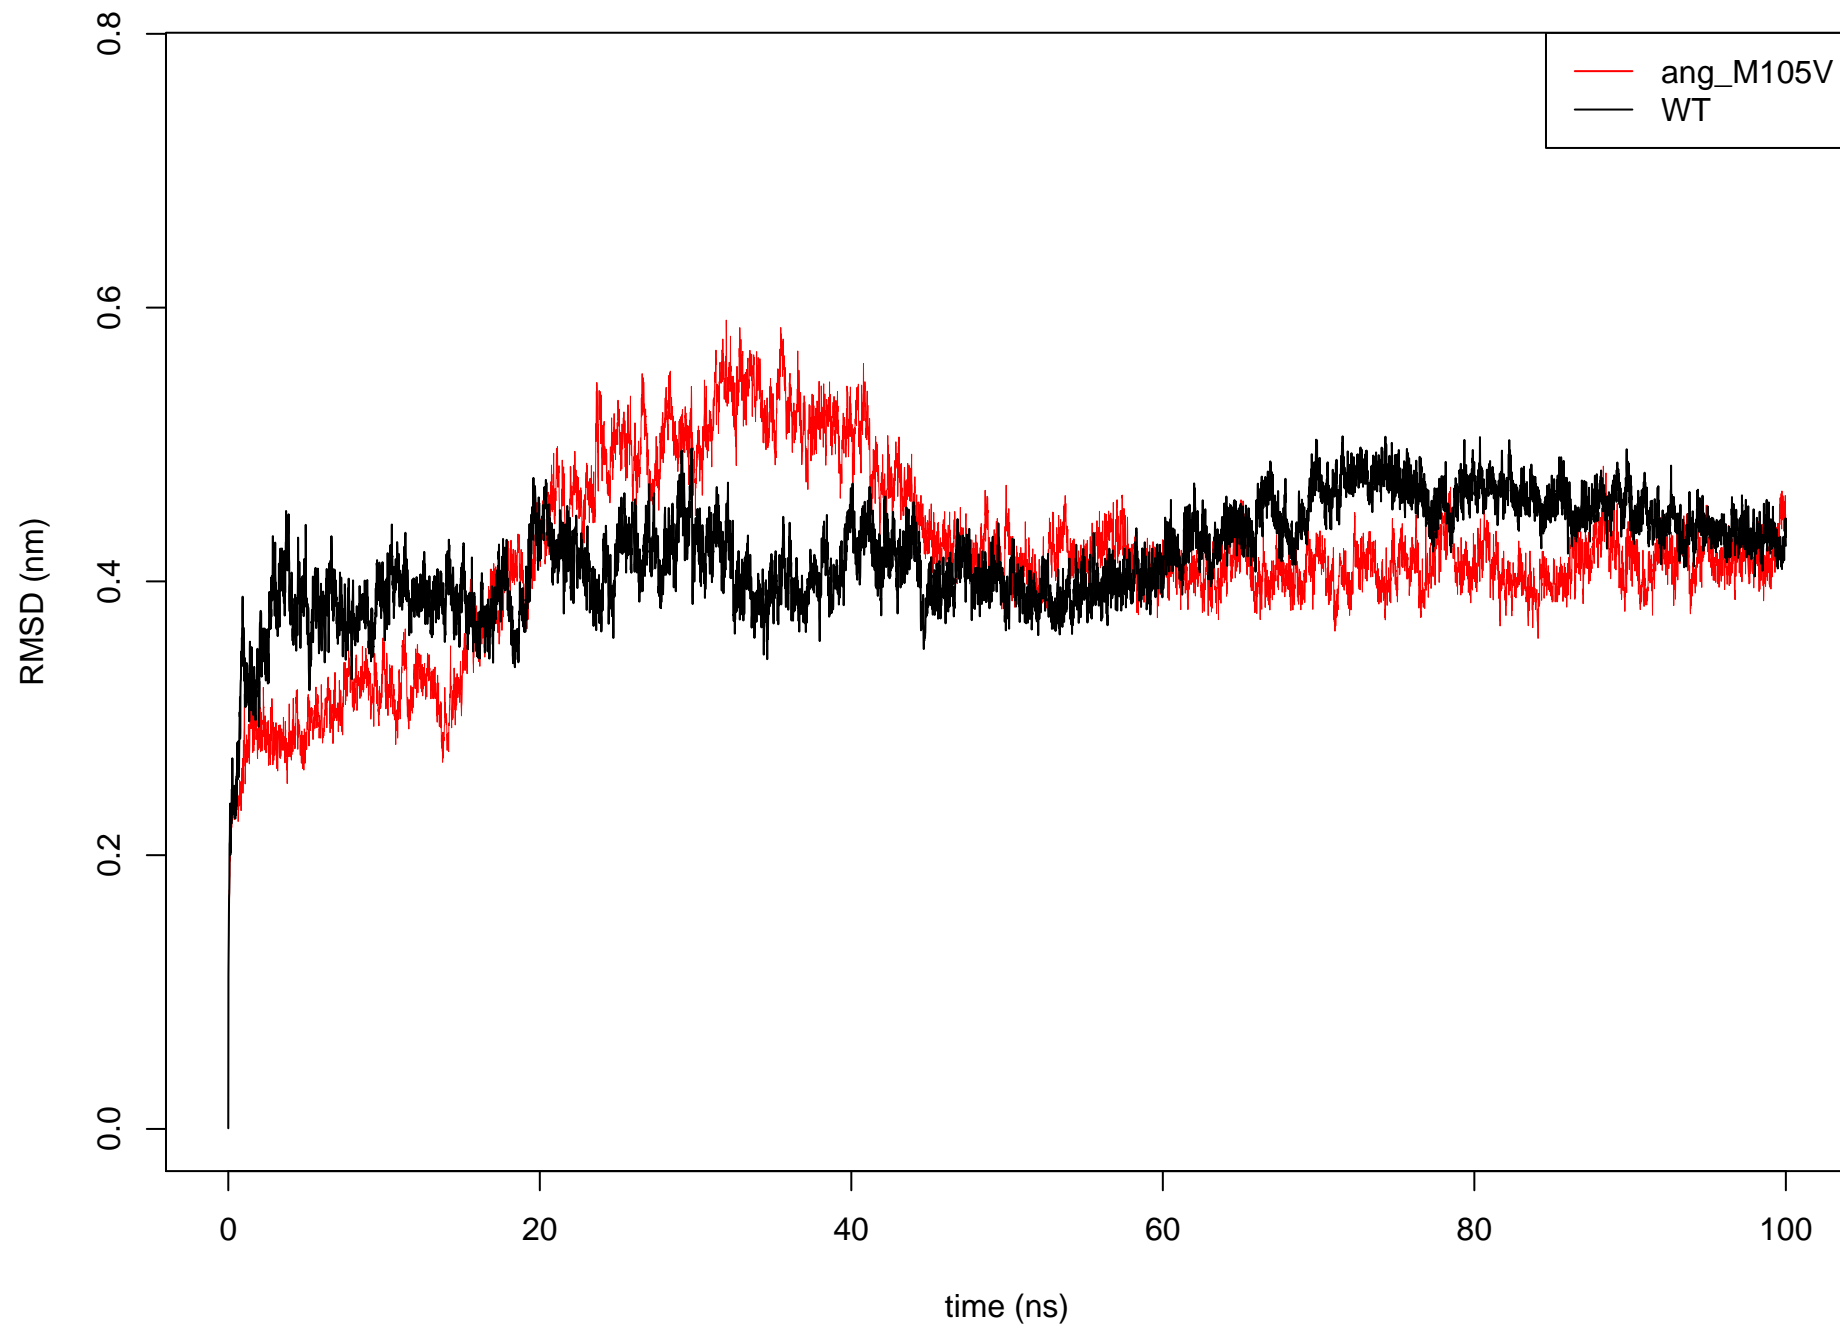

C alpha RMSD: ang\_P40L vs WT

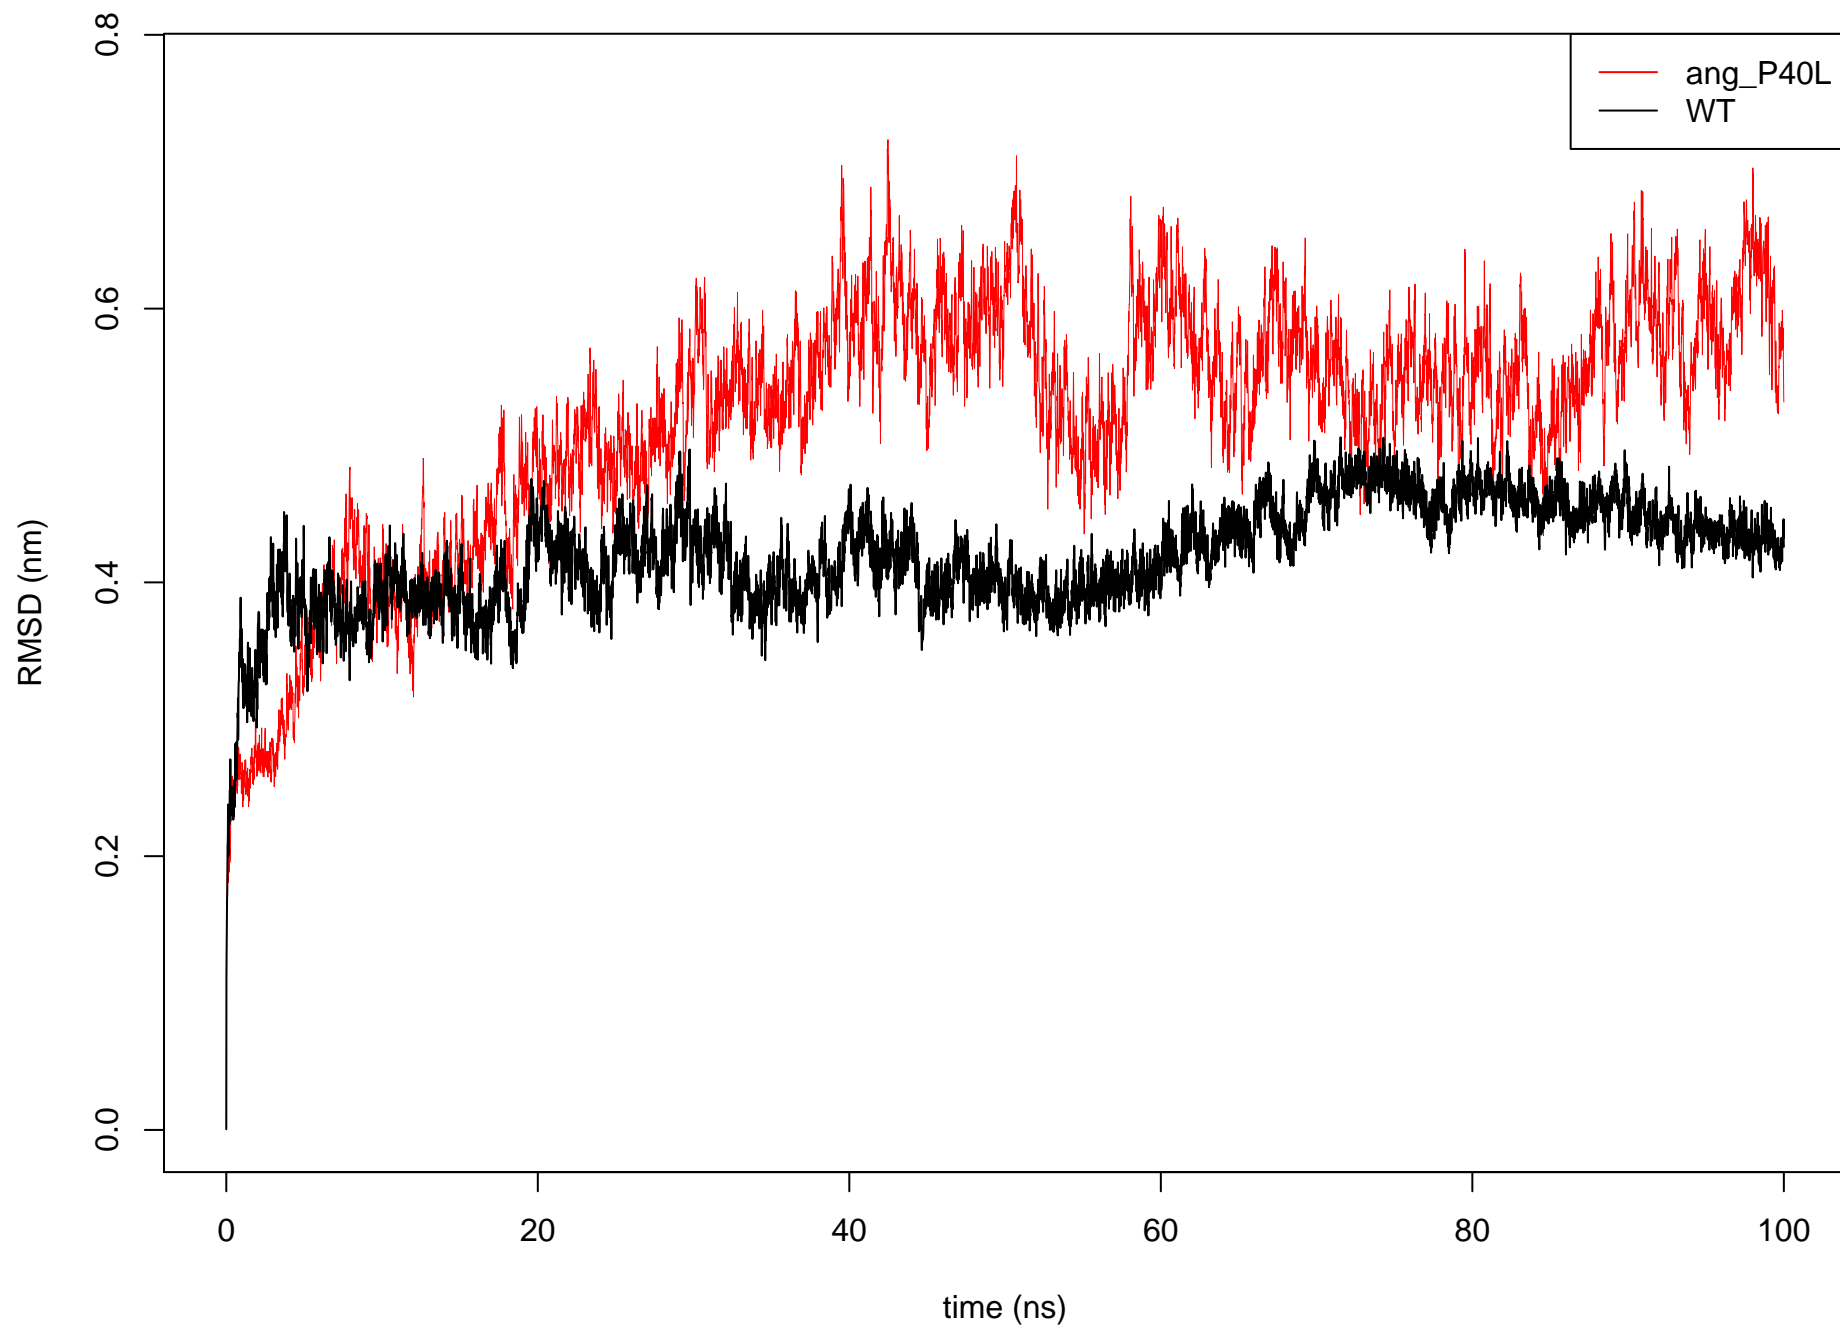

C alpha RMSD: ang\_S49G vs WT

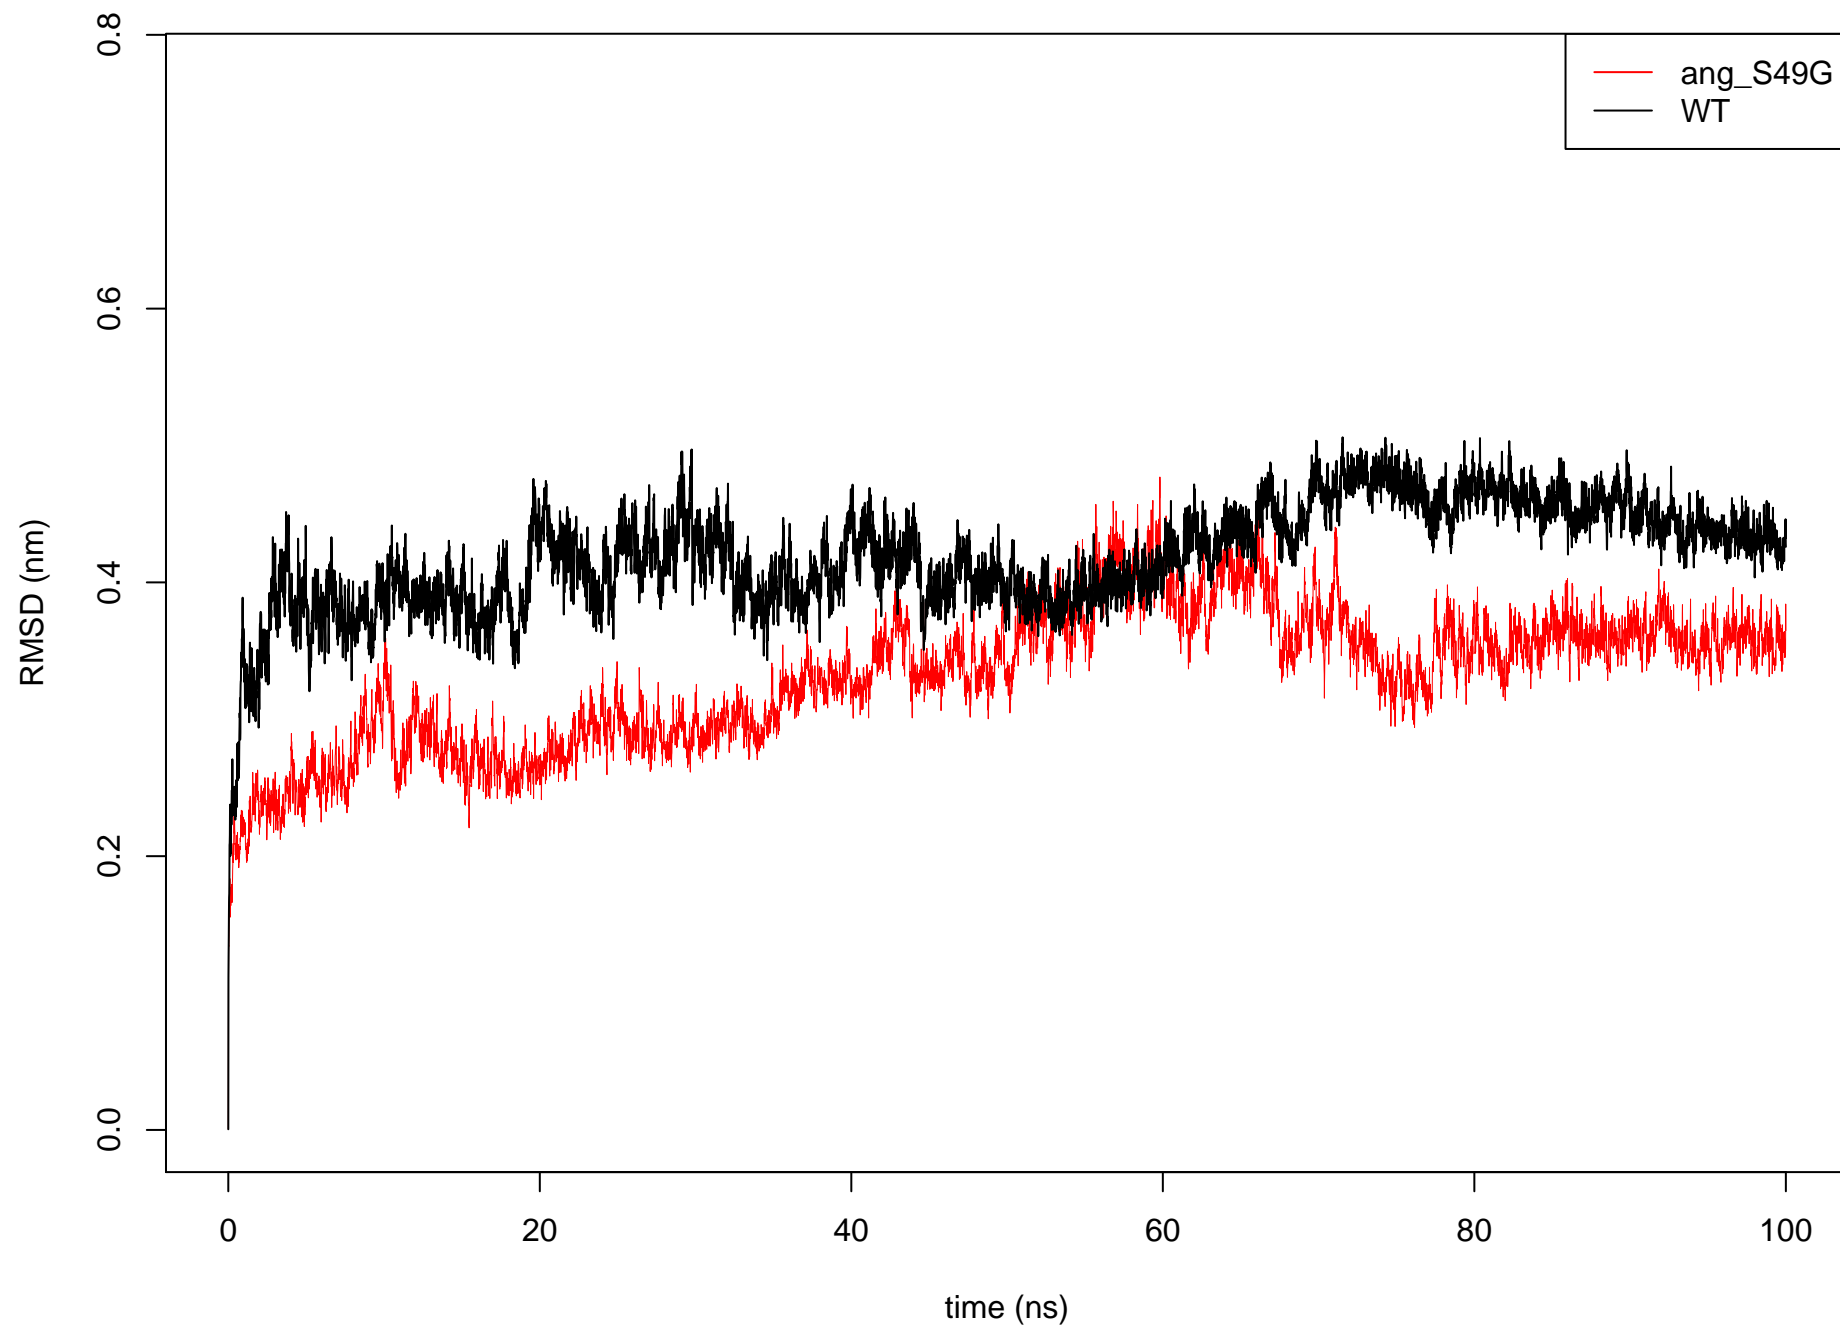



C alpha RMSD: ang\_S49N vs WT

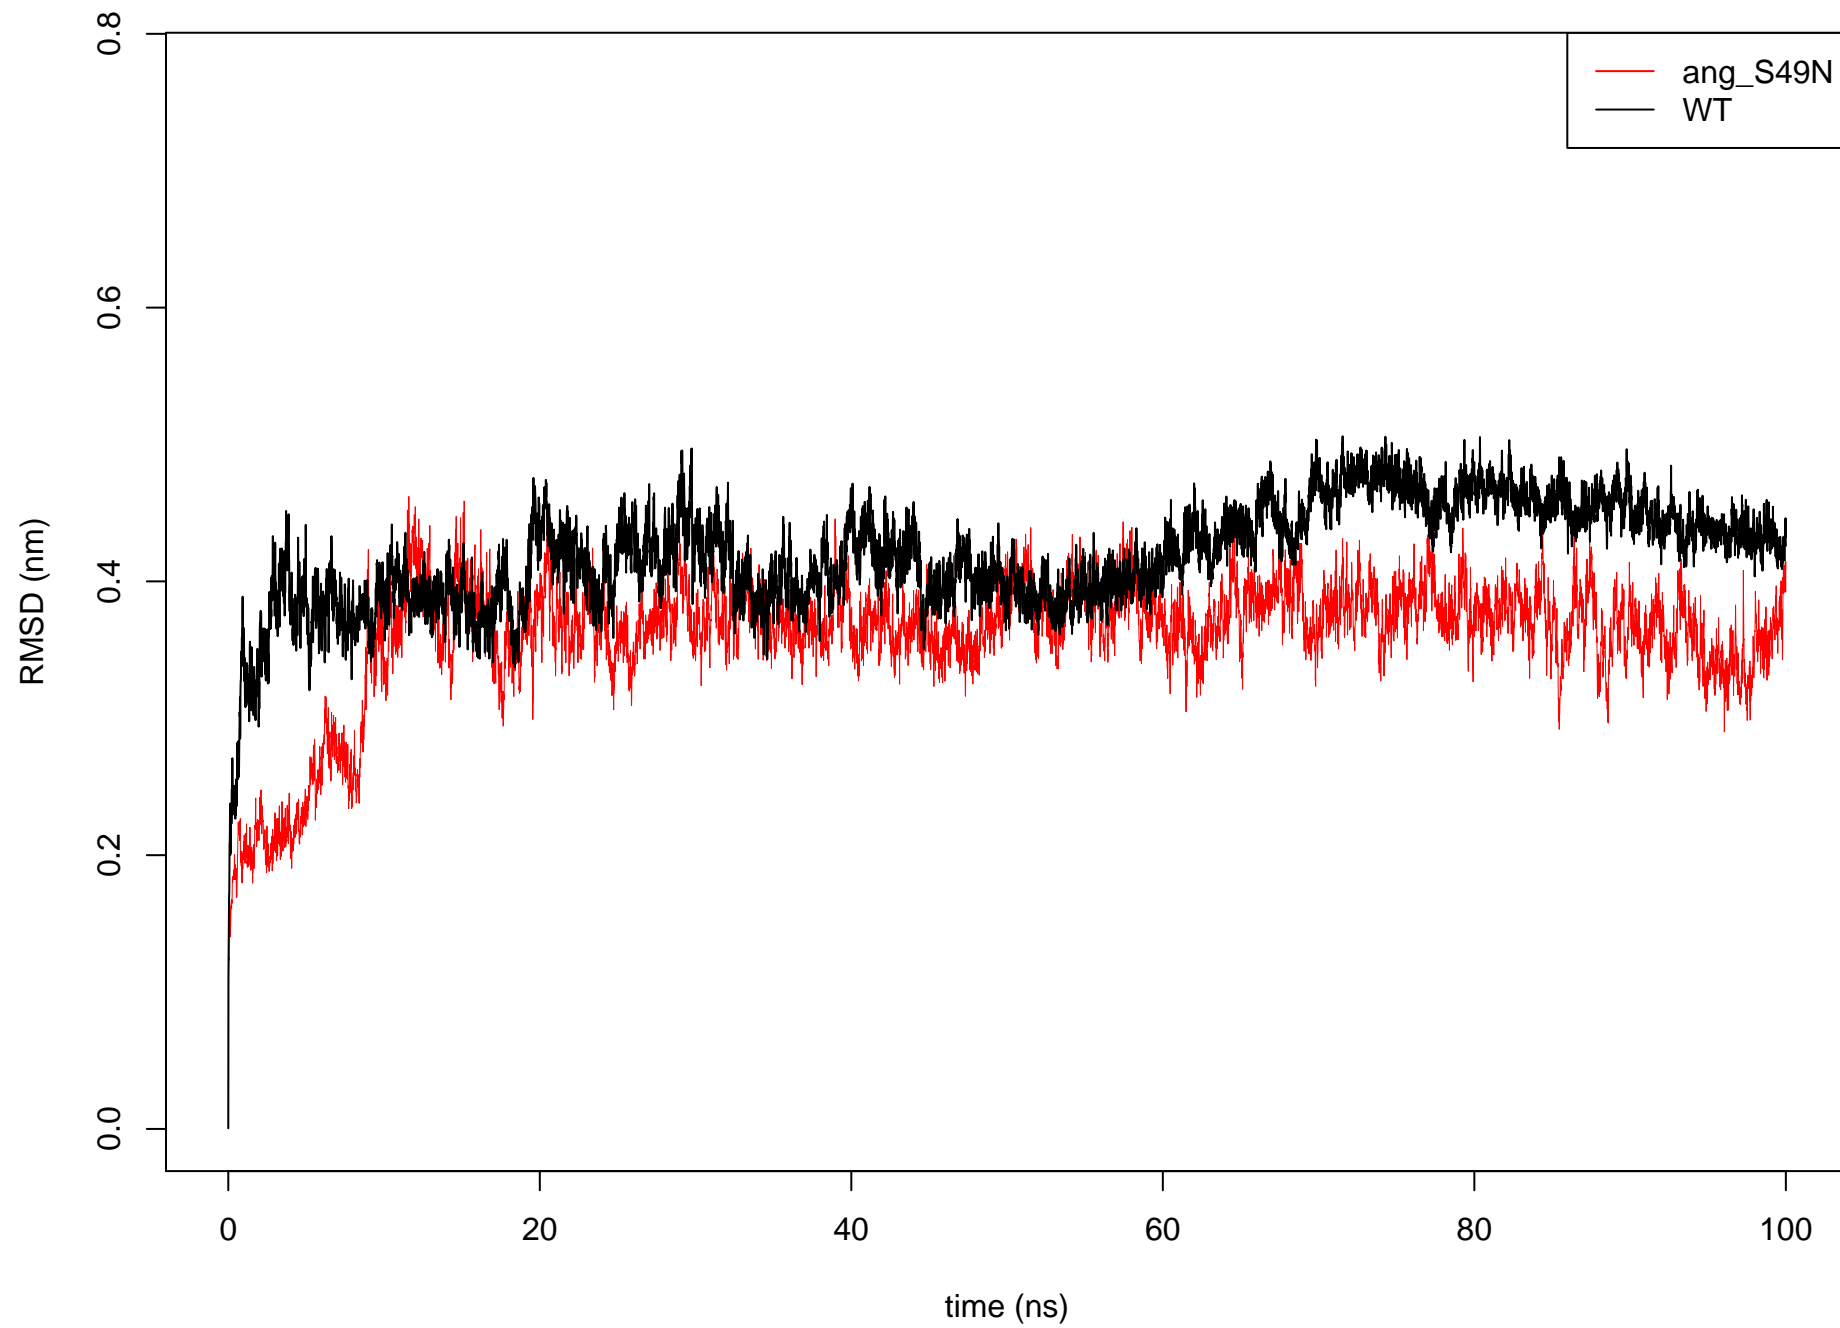

C alpha RMSD: ren\_A188V vs WT

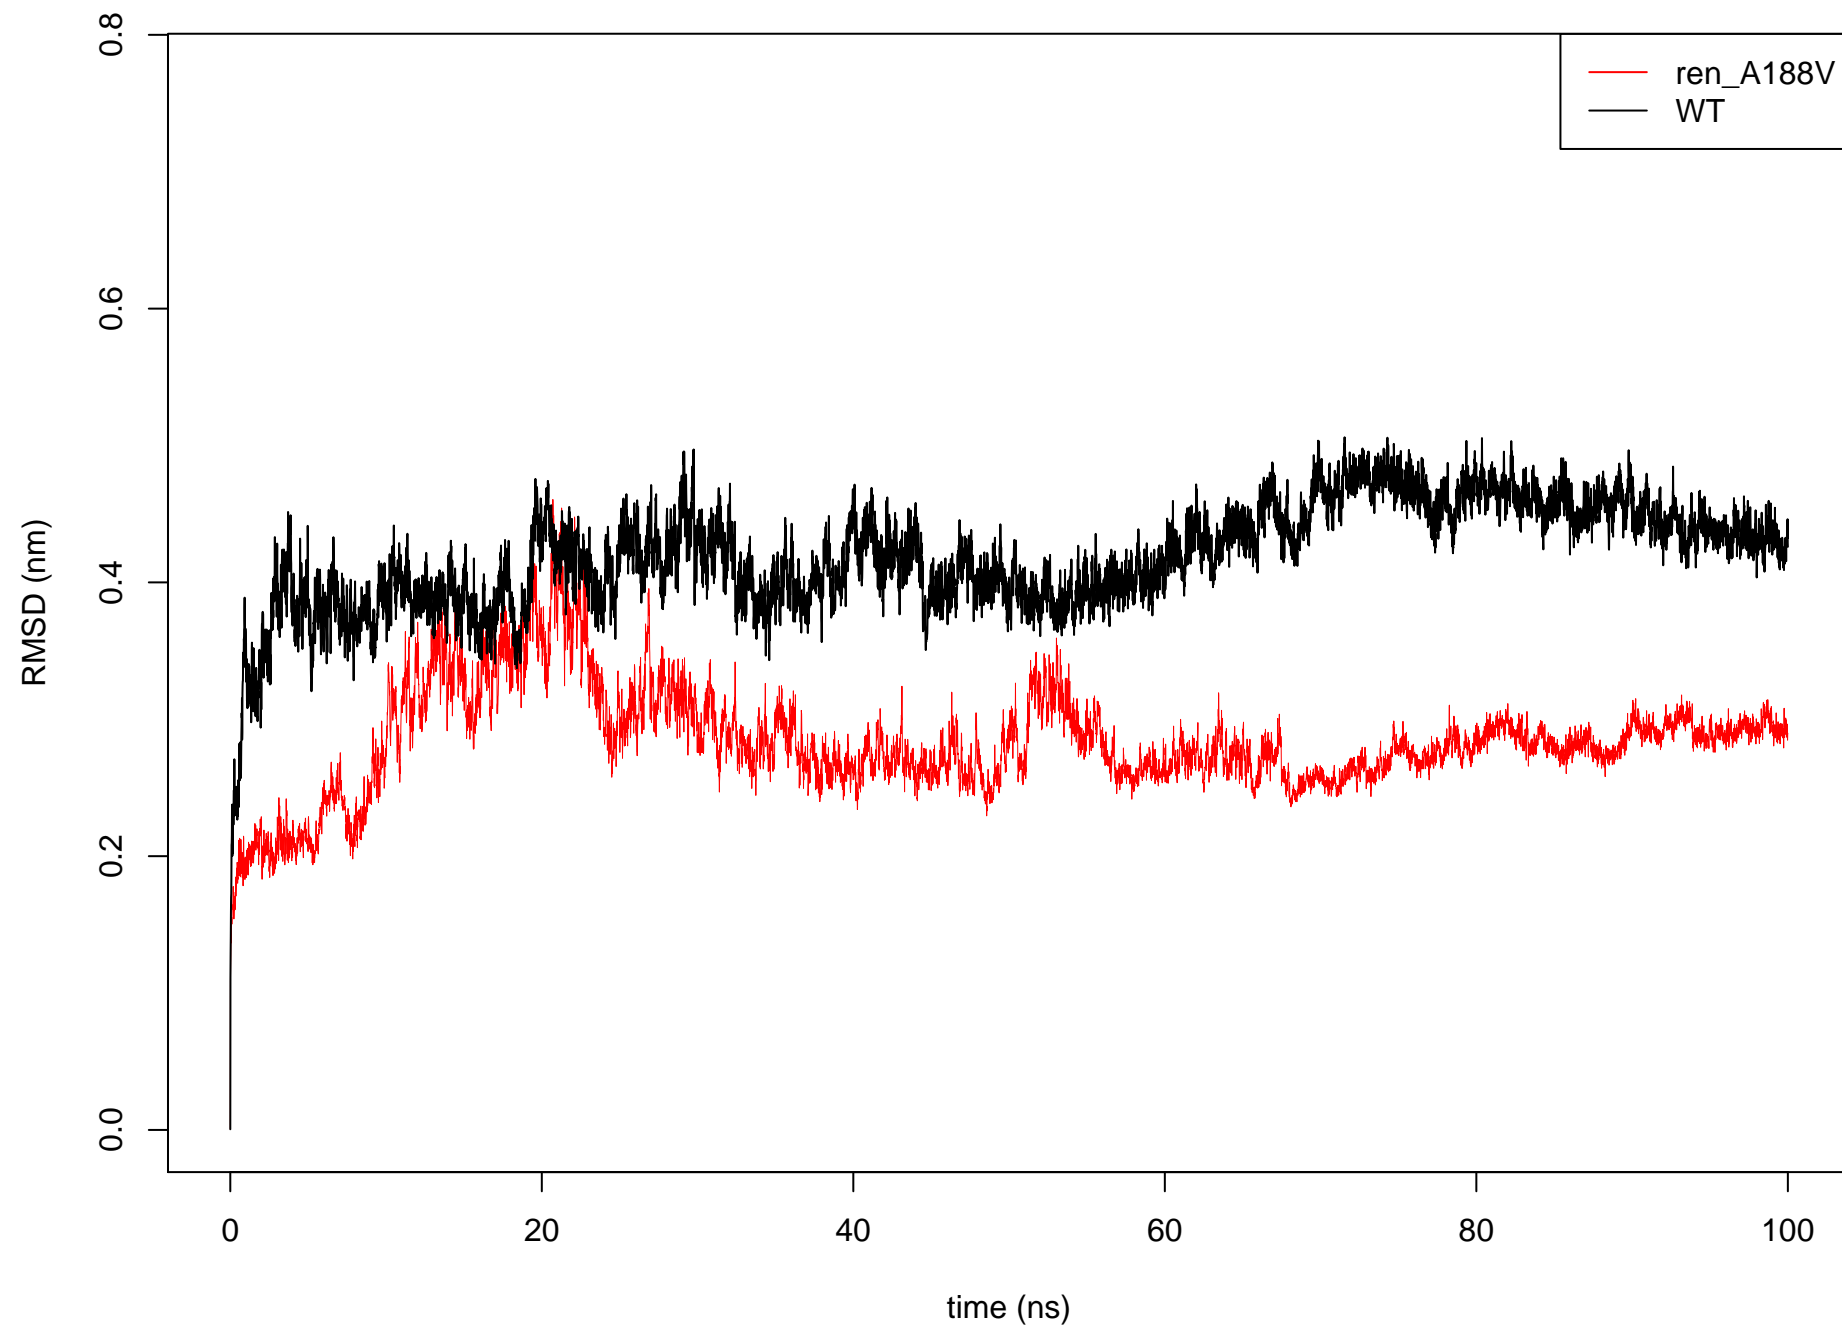

C alpha RMSD: ren\_D104N\_ang\_L43F vs WT

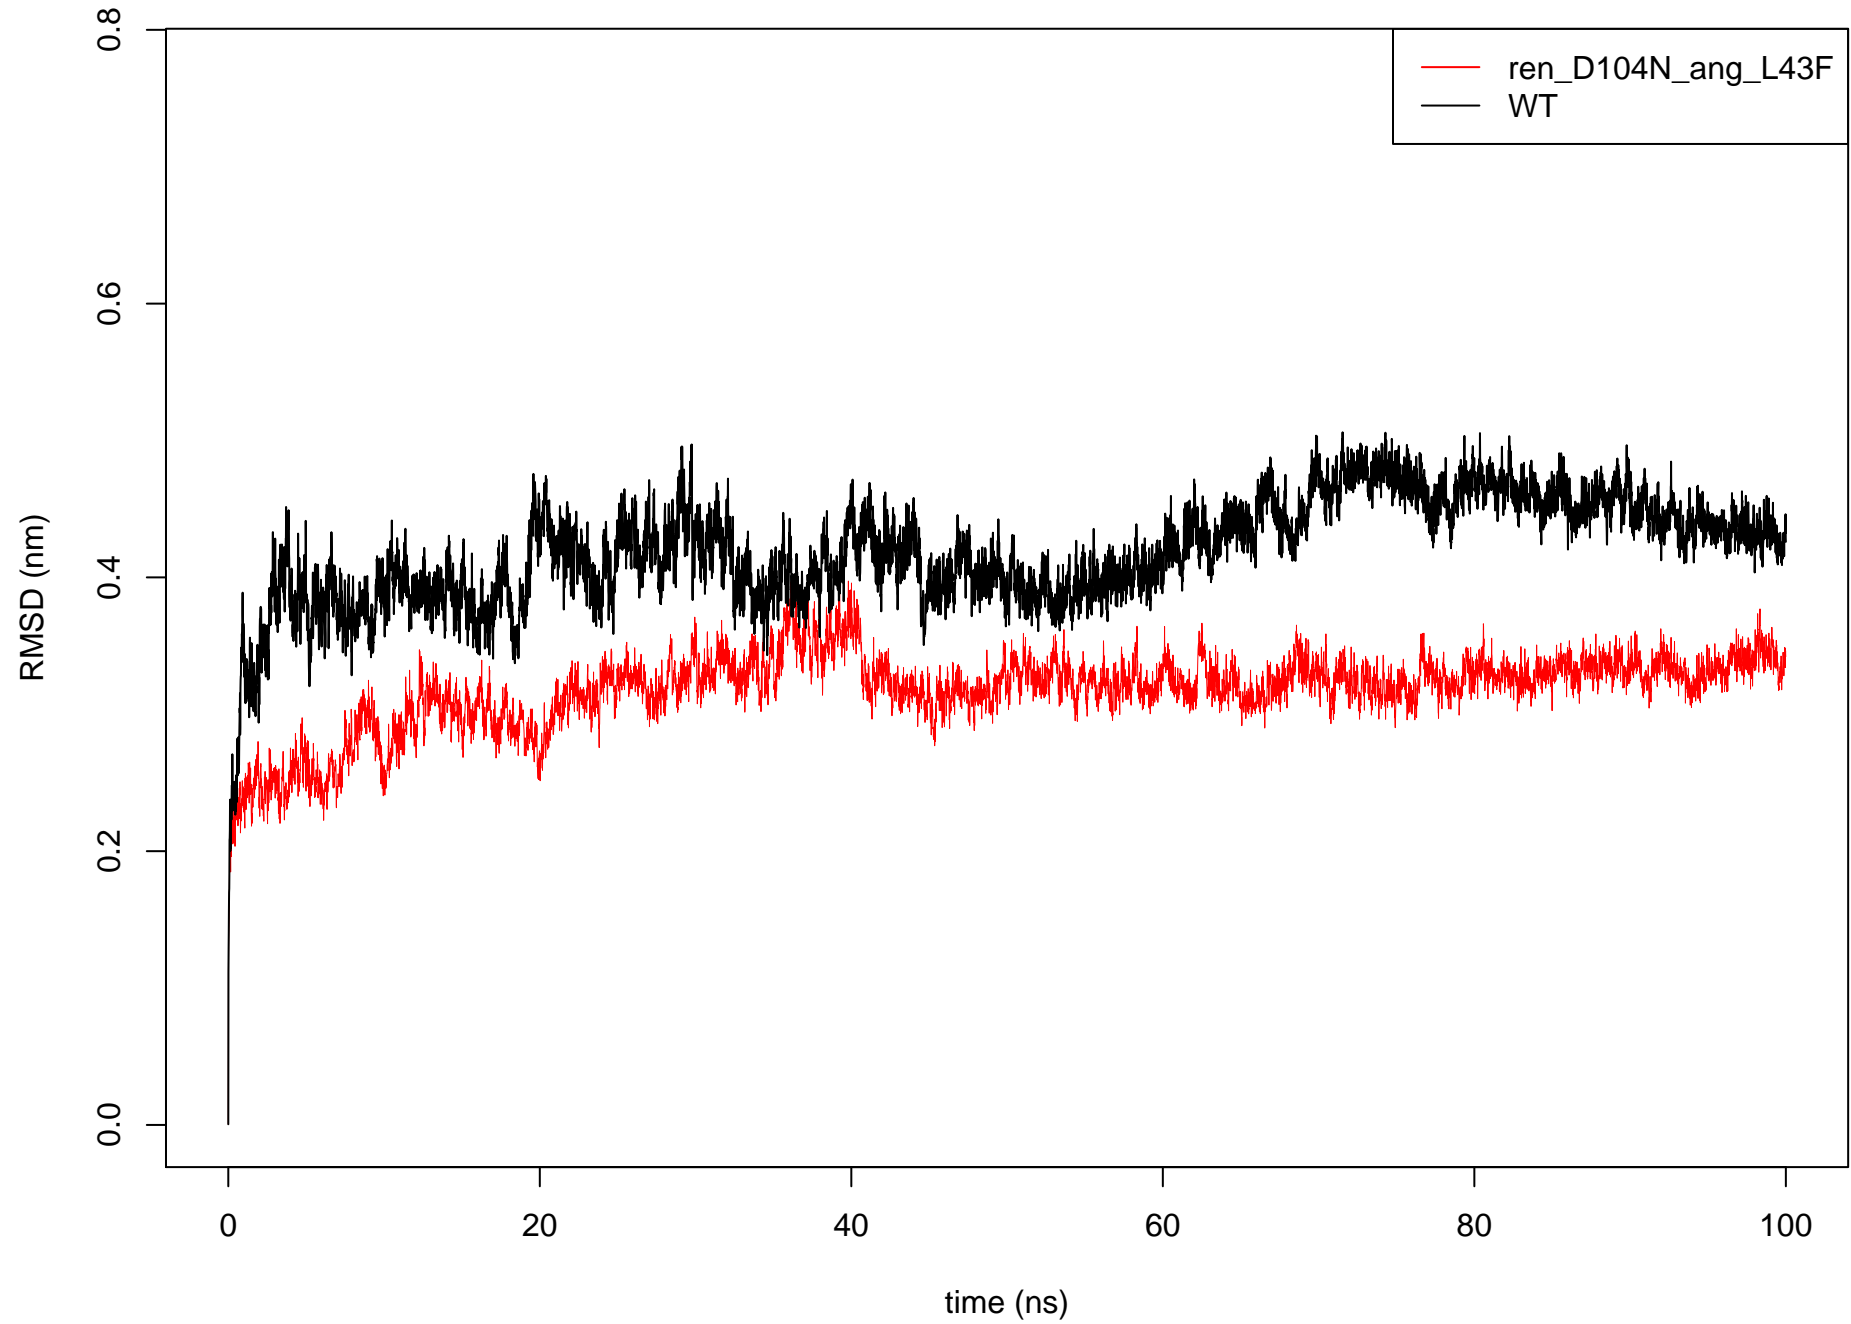

C alpha RMSD: ren\_D104N vs WT

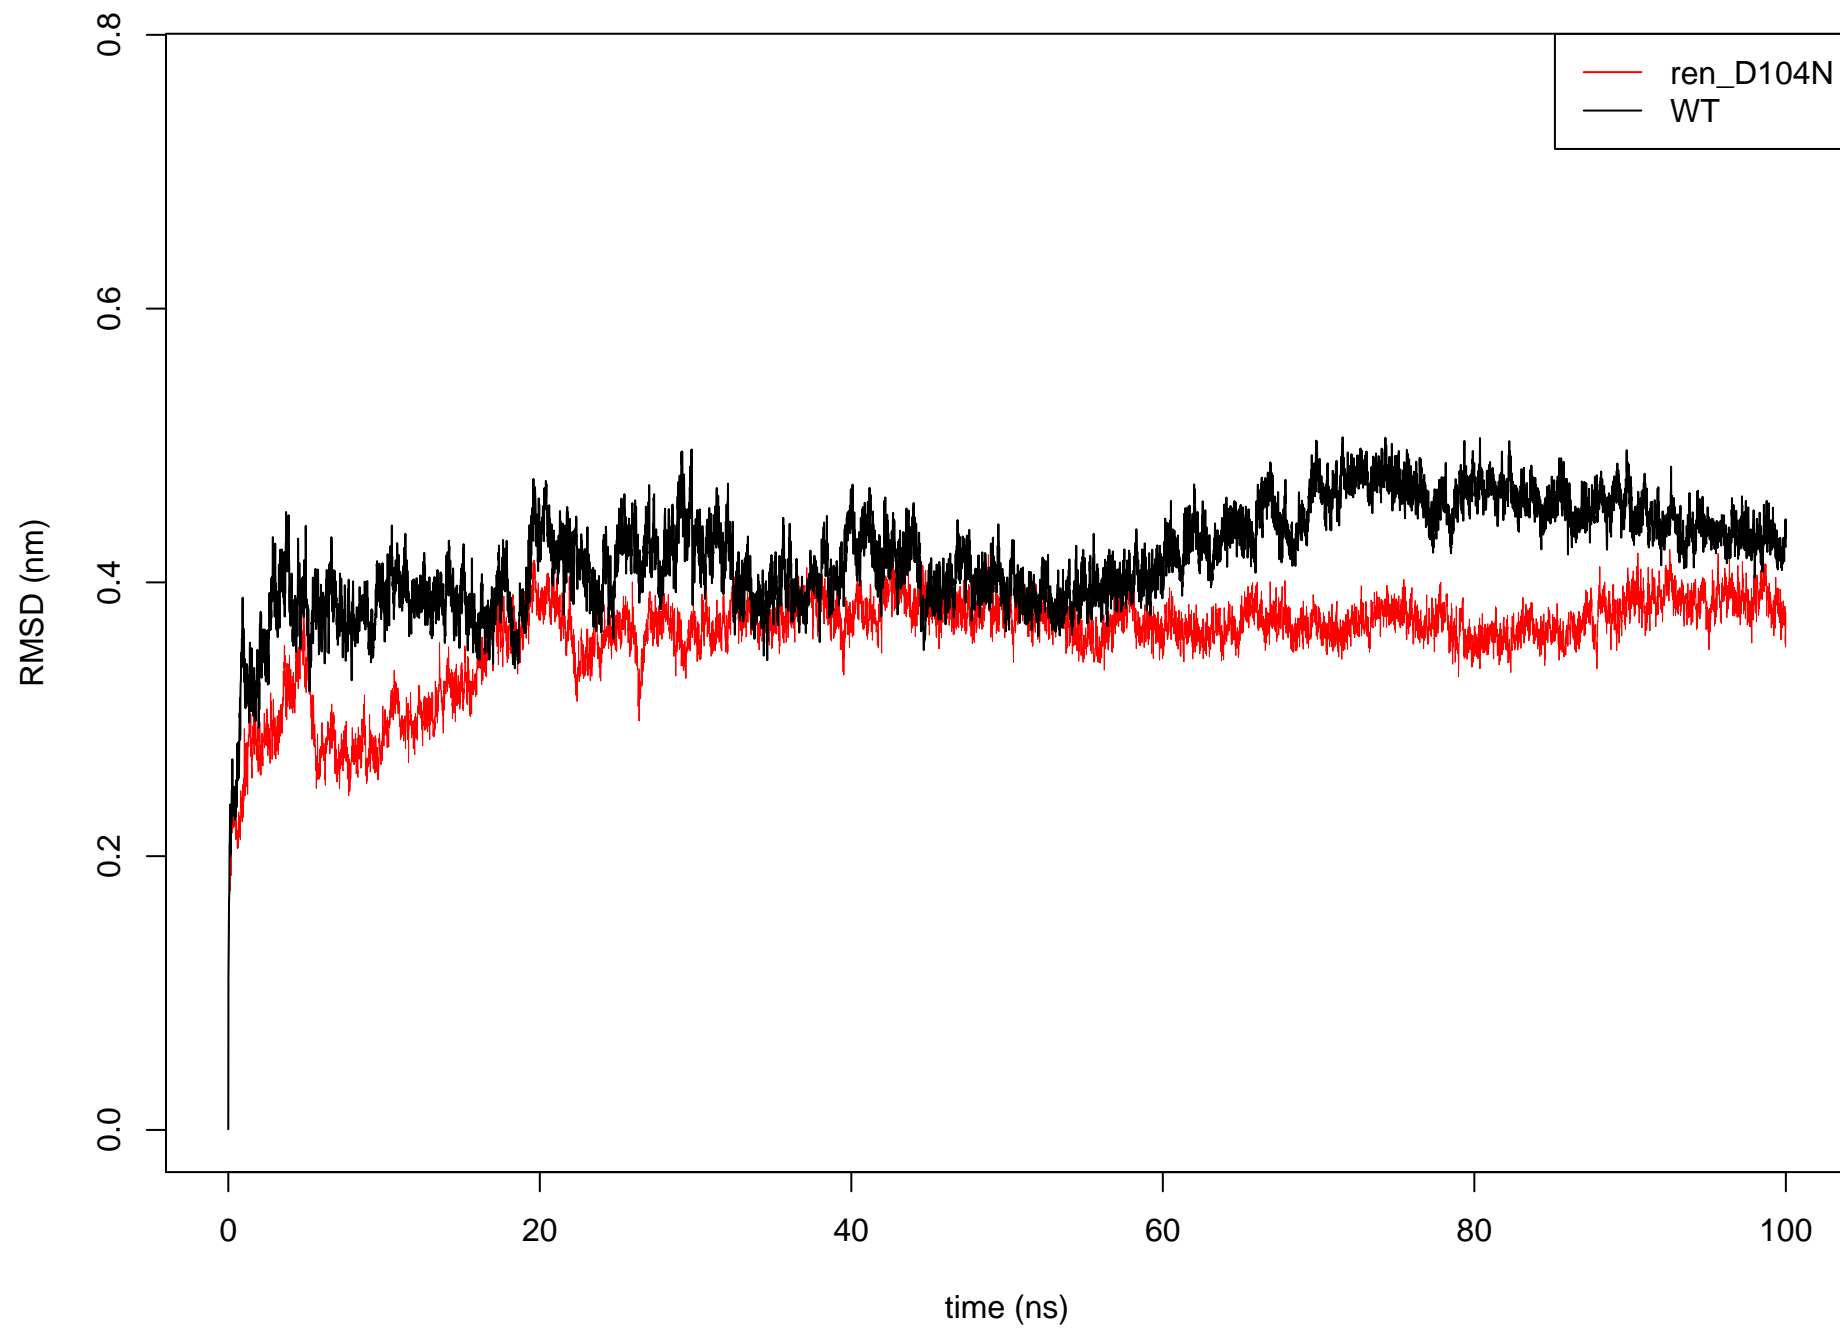

C alpha RMSD: ren\_F319V\_ang\_A104T vs WT

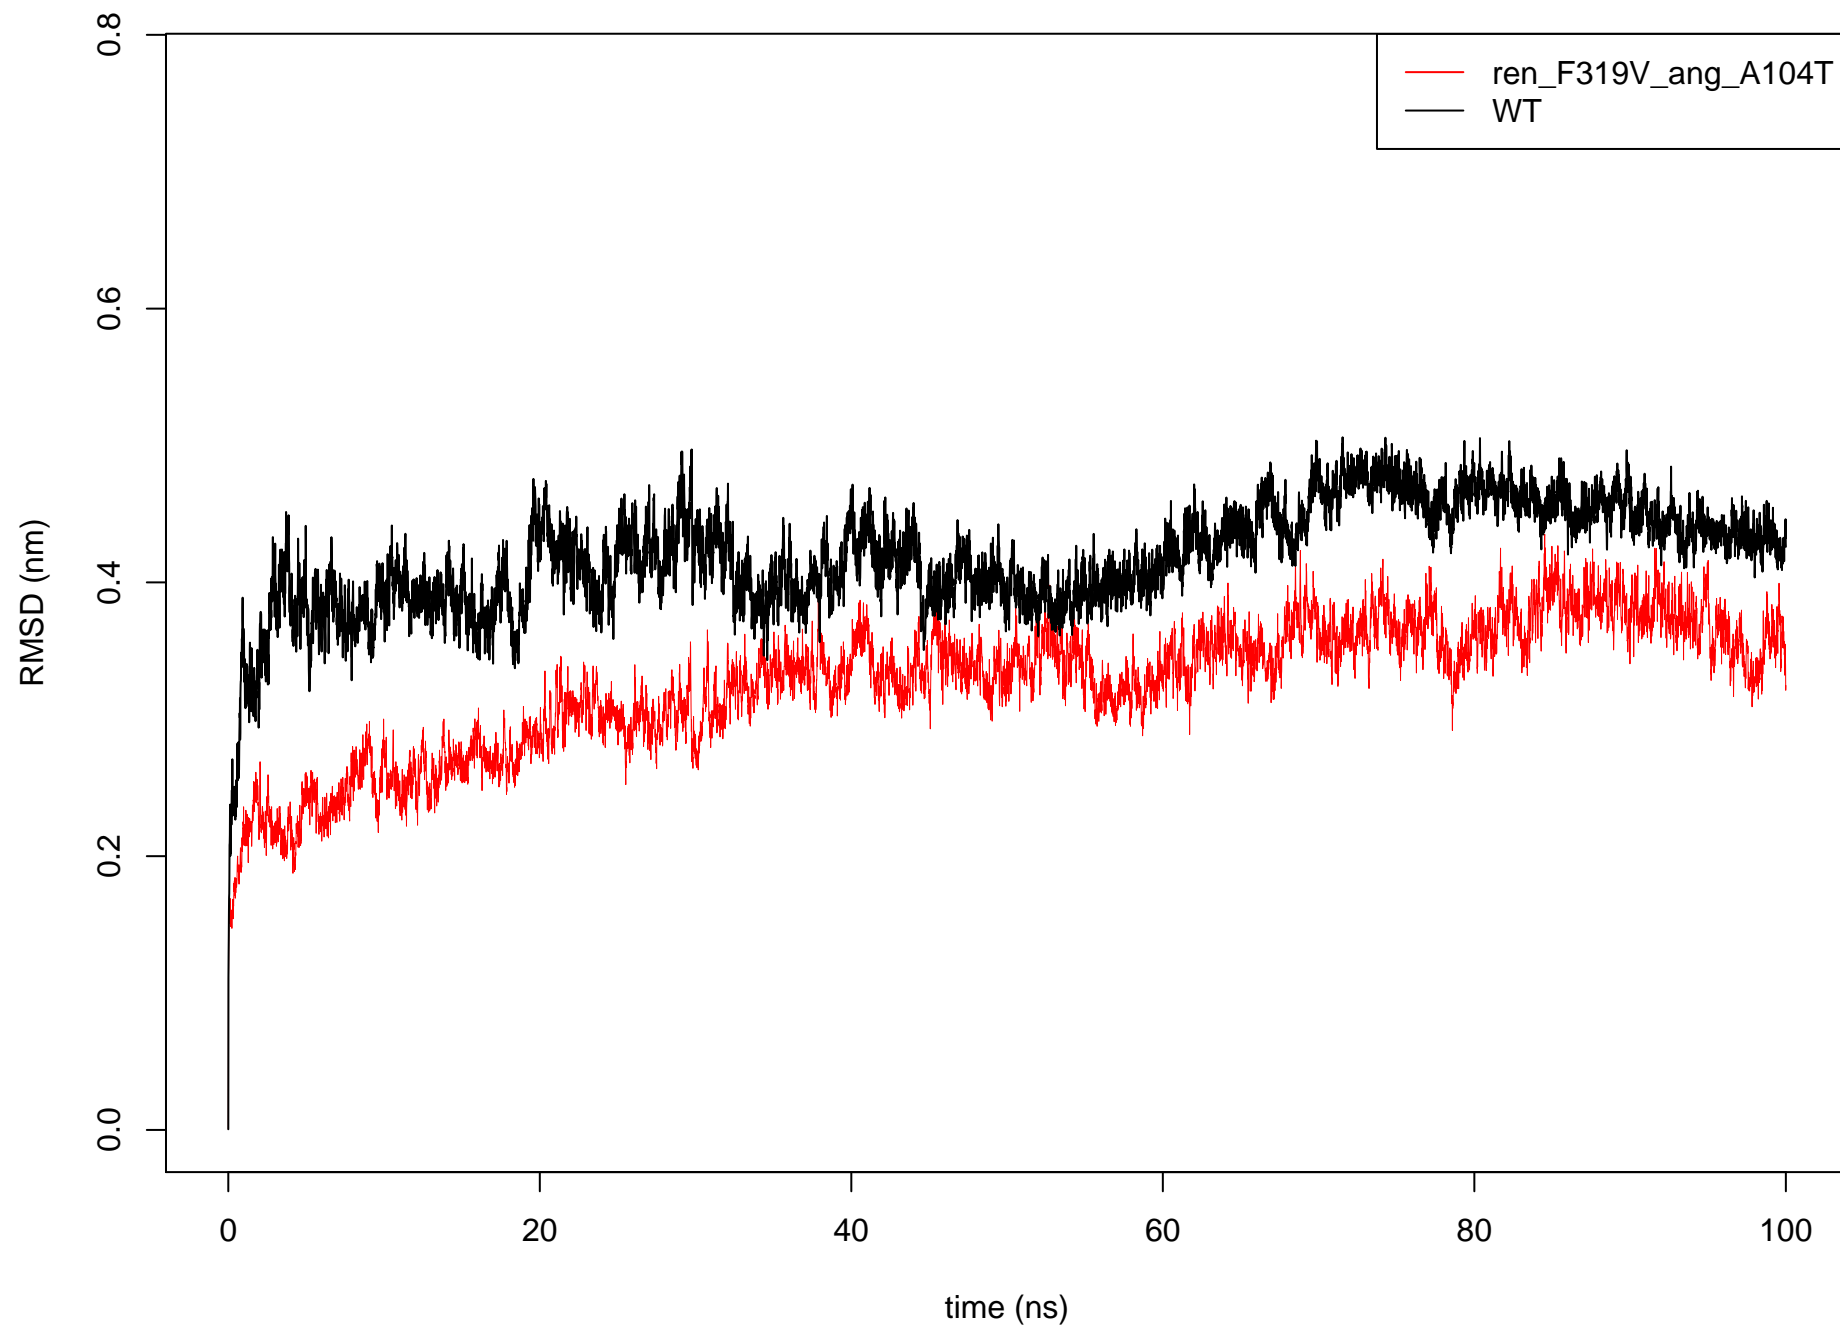

C alpha RMSD: ren\_F319V\_ang\_M105V vs WT

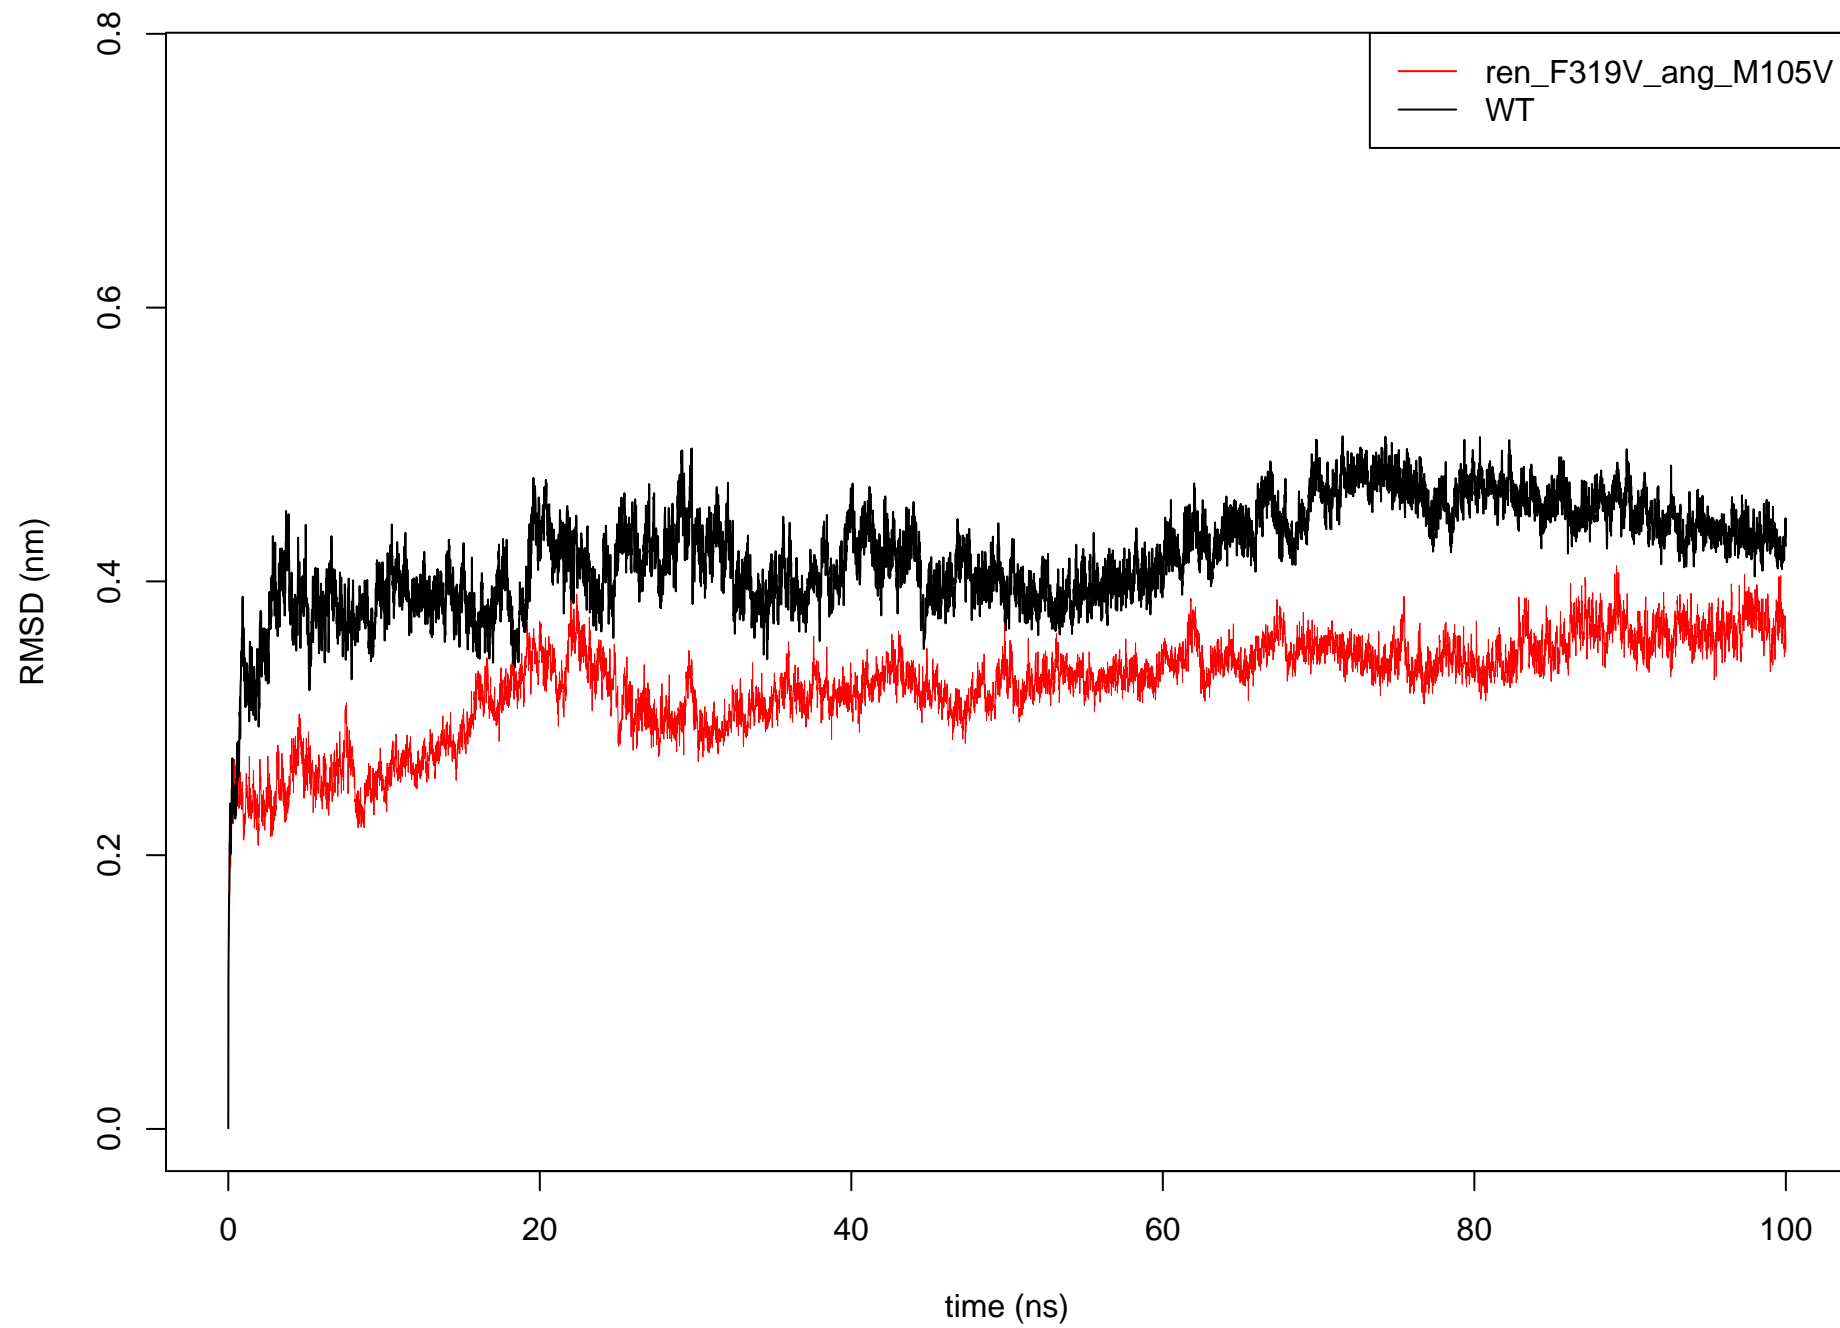

C alpha RMSD: ren\_F319V vs WT

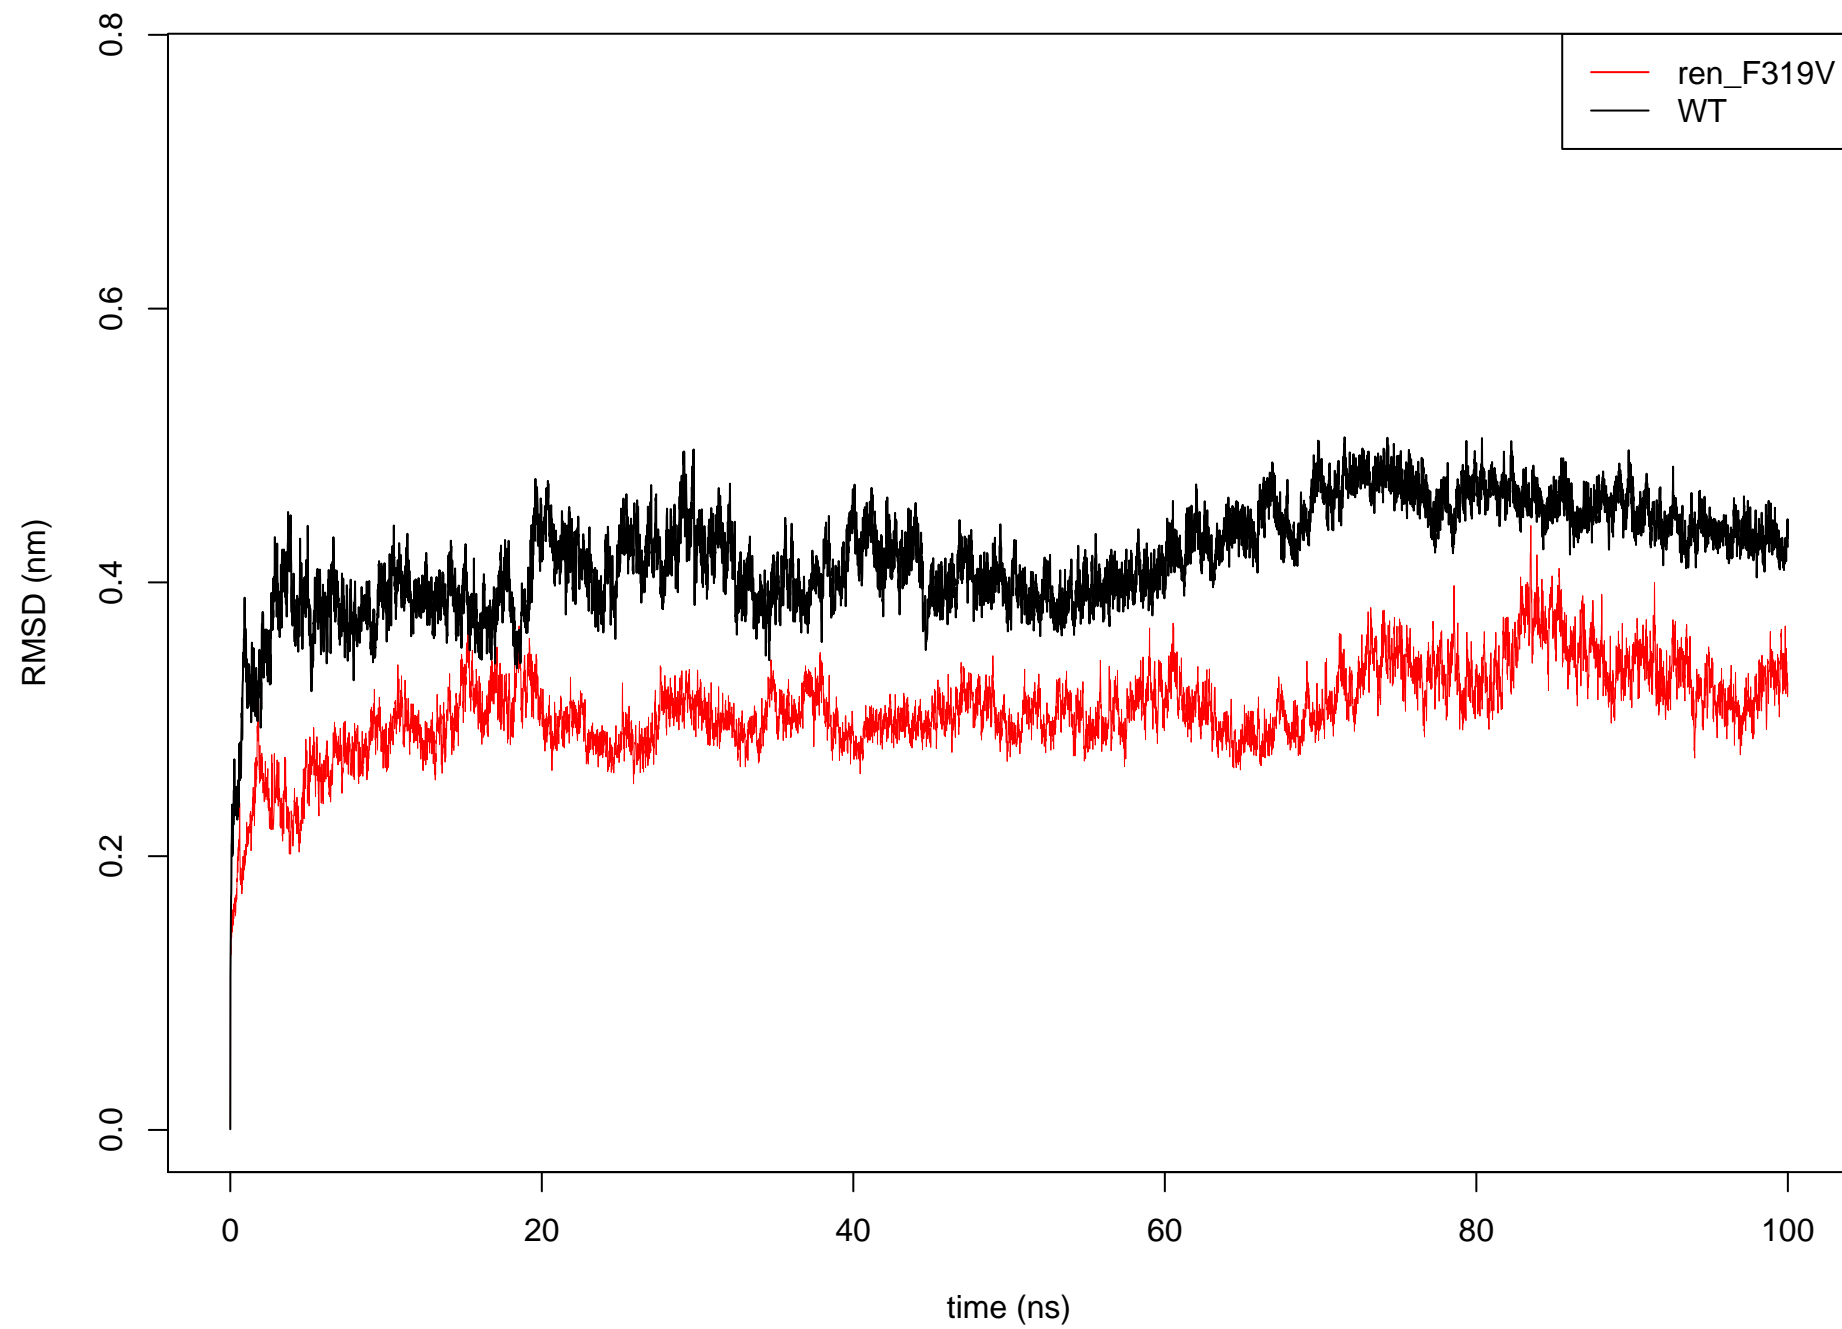

C alpha RMSD: ren\_L318R\_ang\_A104T vs WT

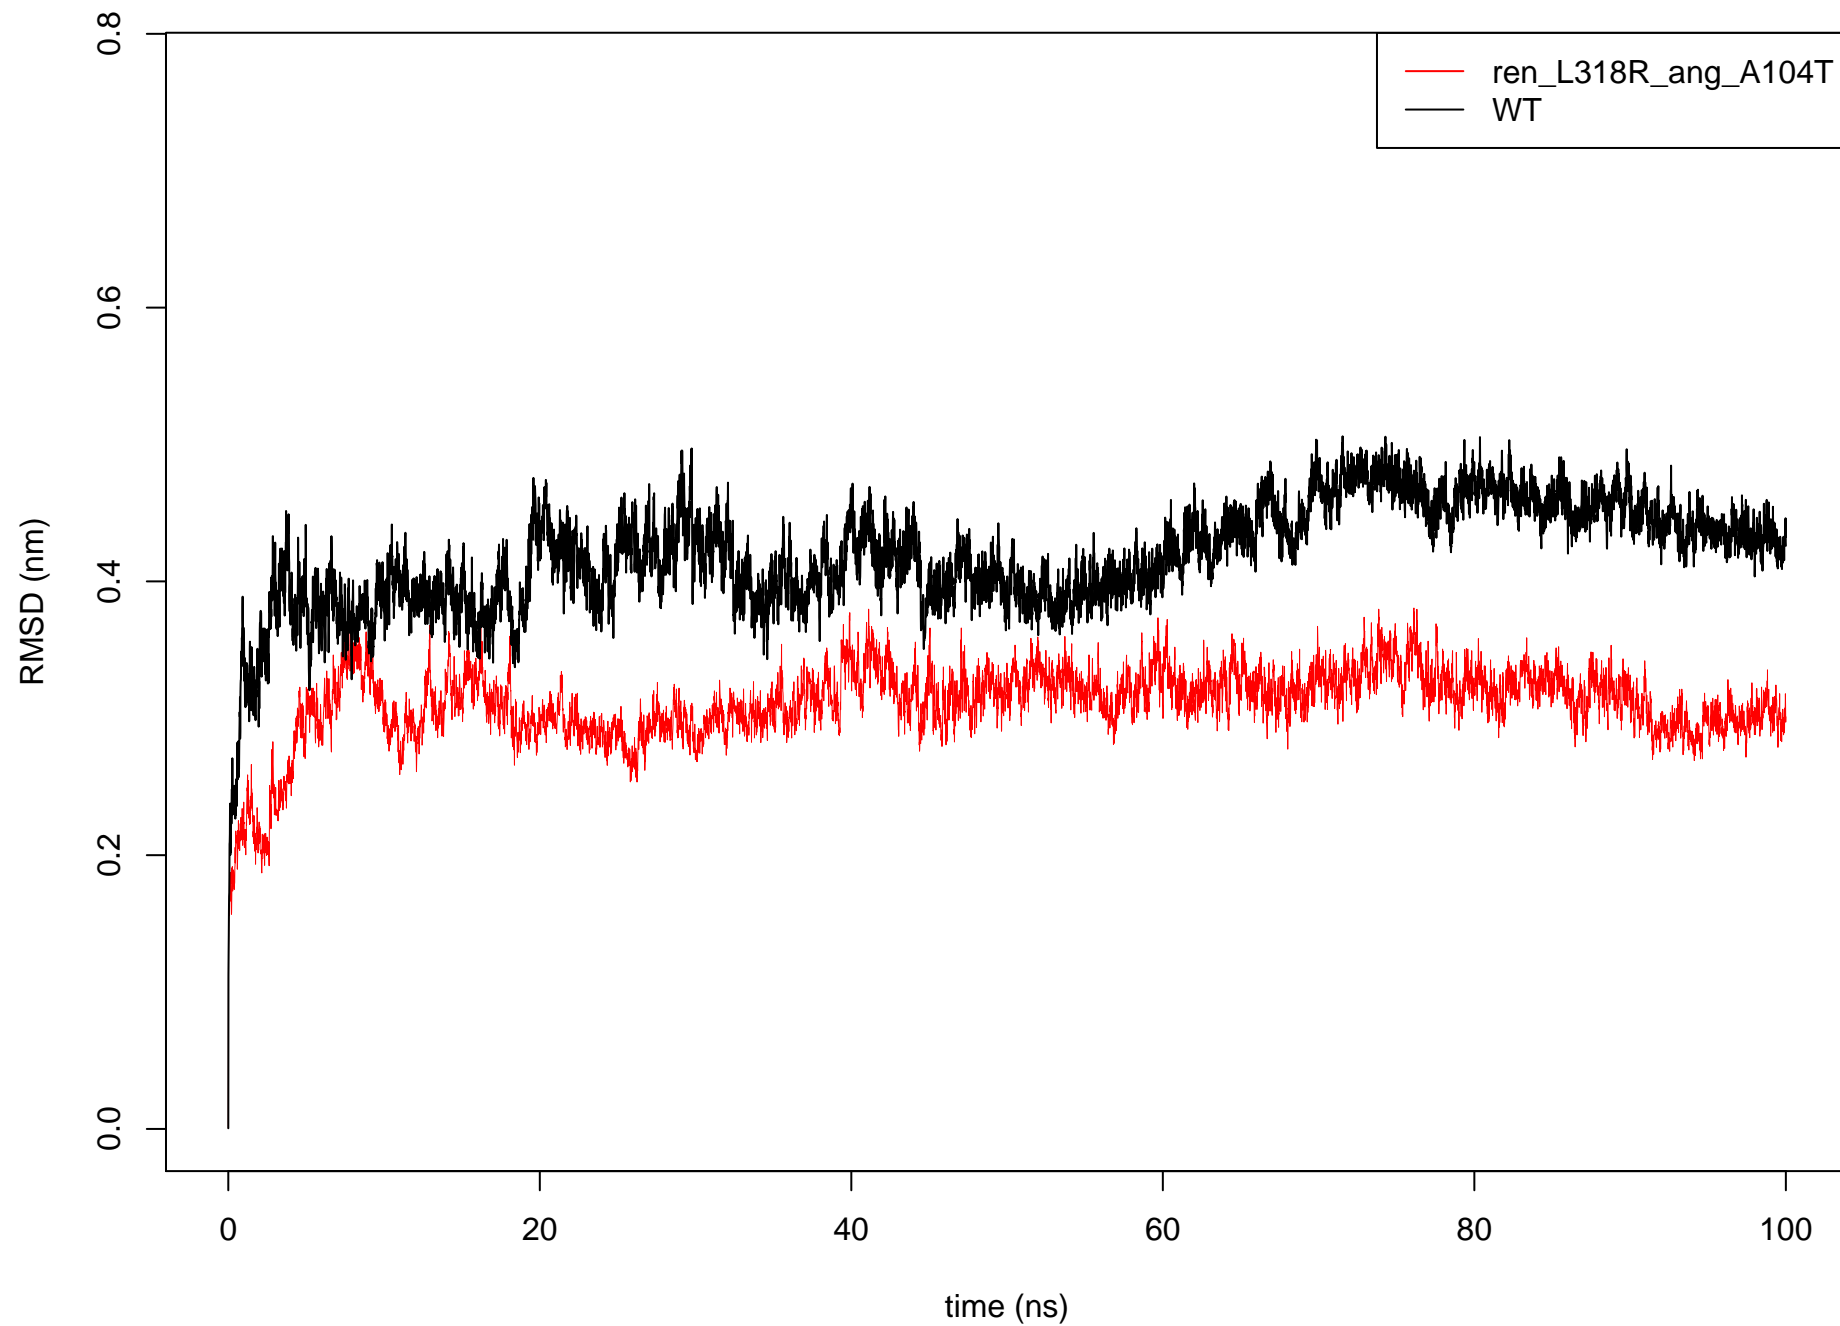



C alpha RMSD: ren\_R148C\_ang\_E48K vs WT

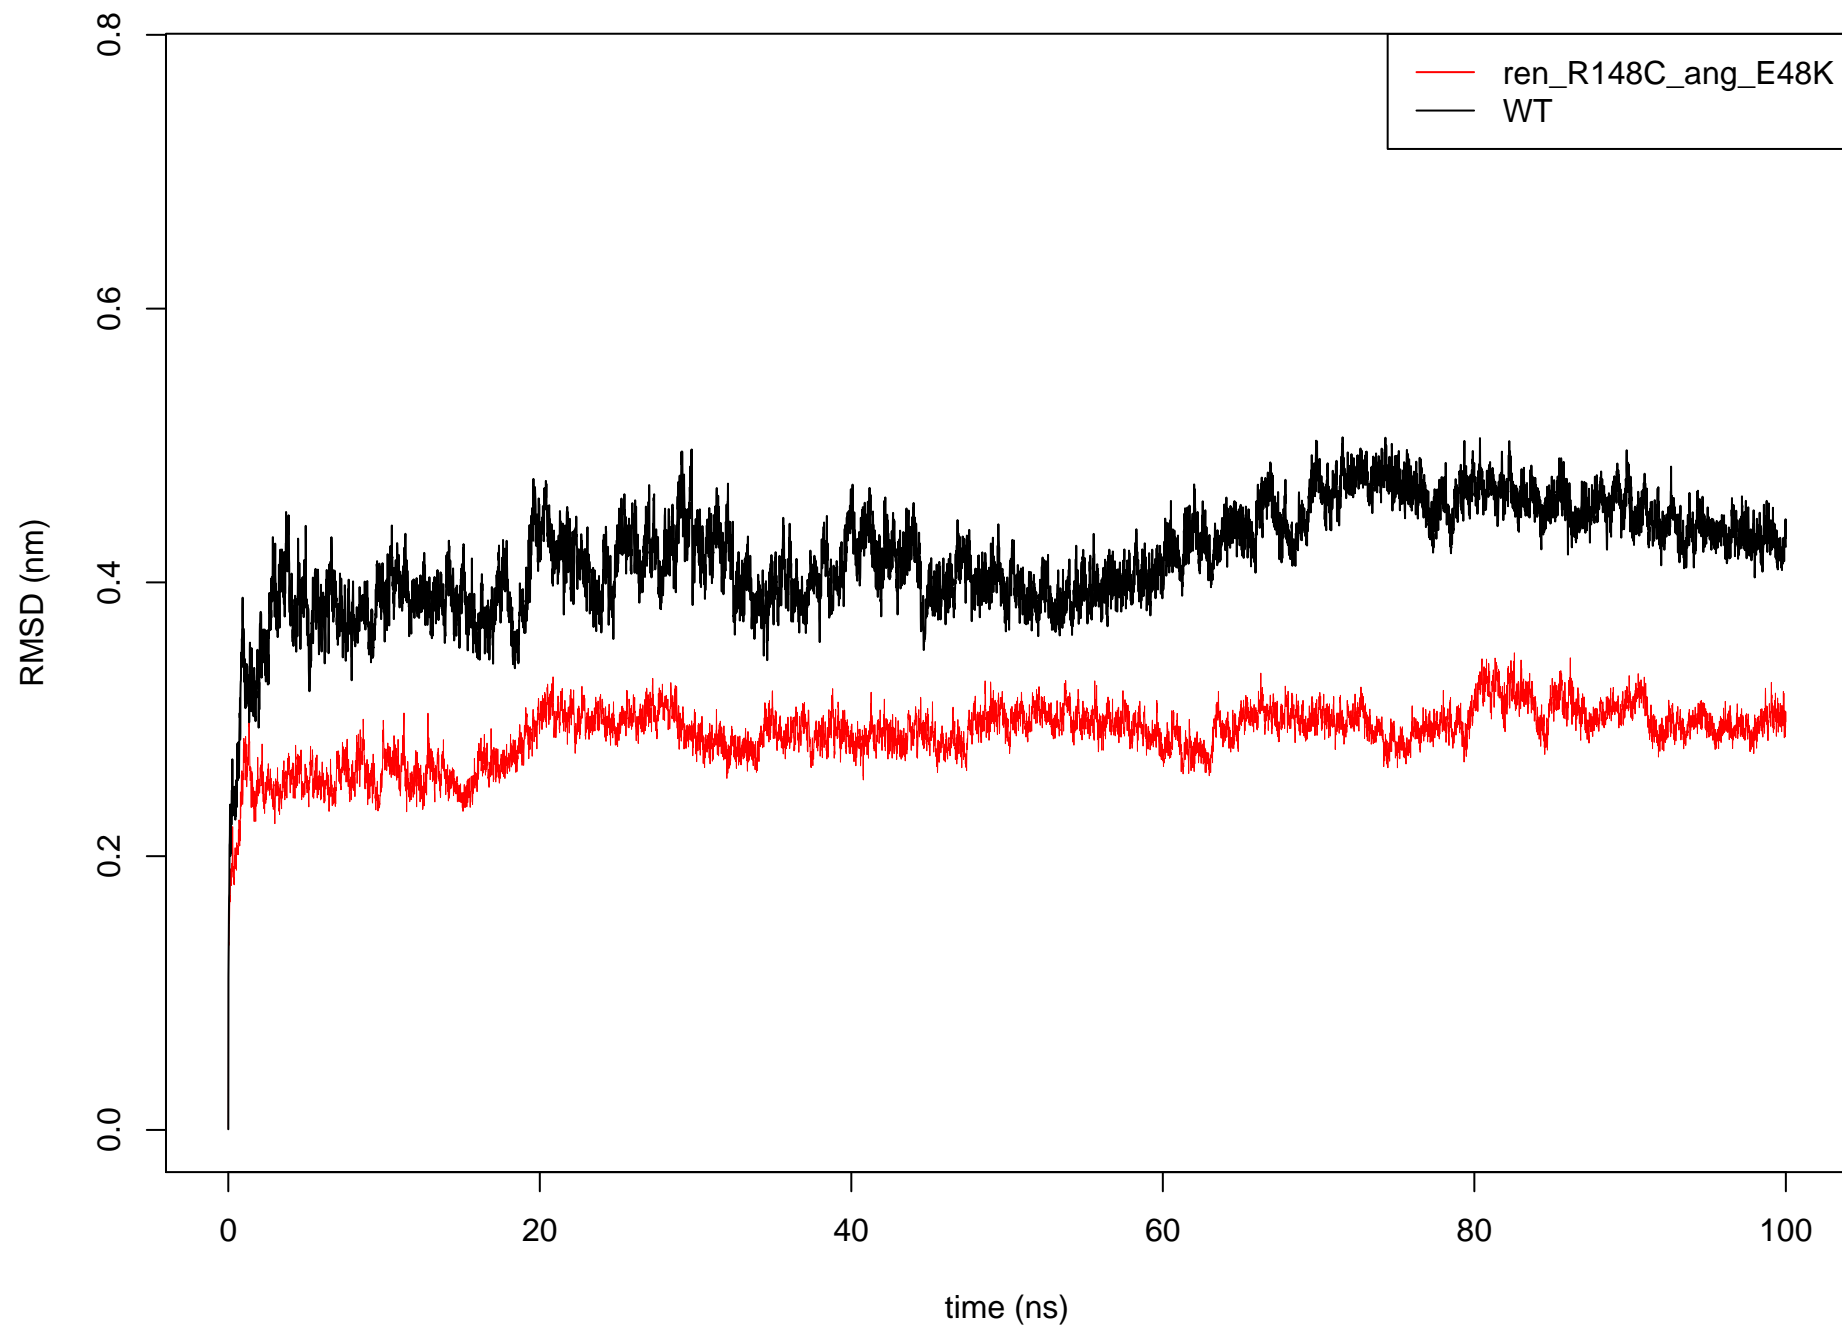

C alpha RMSD: ren\_R148C\_ang\_S49G vs WT

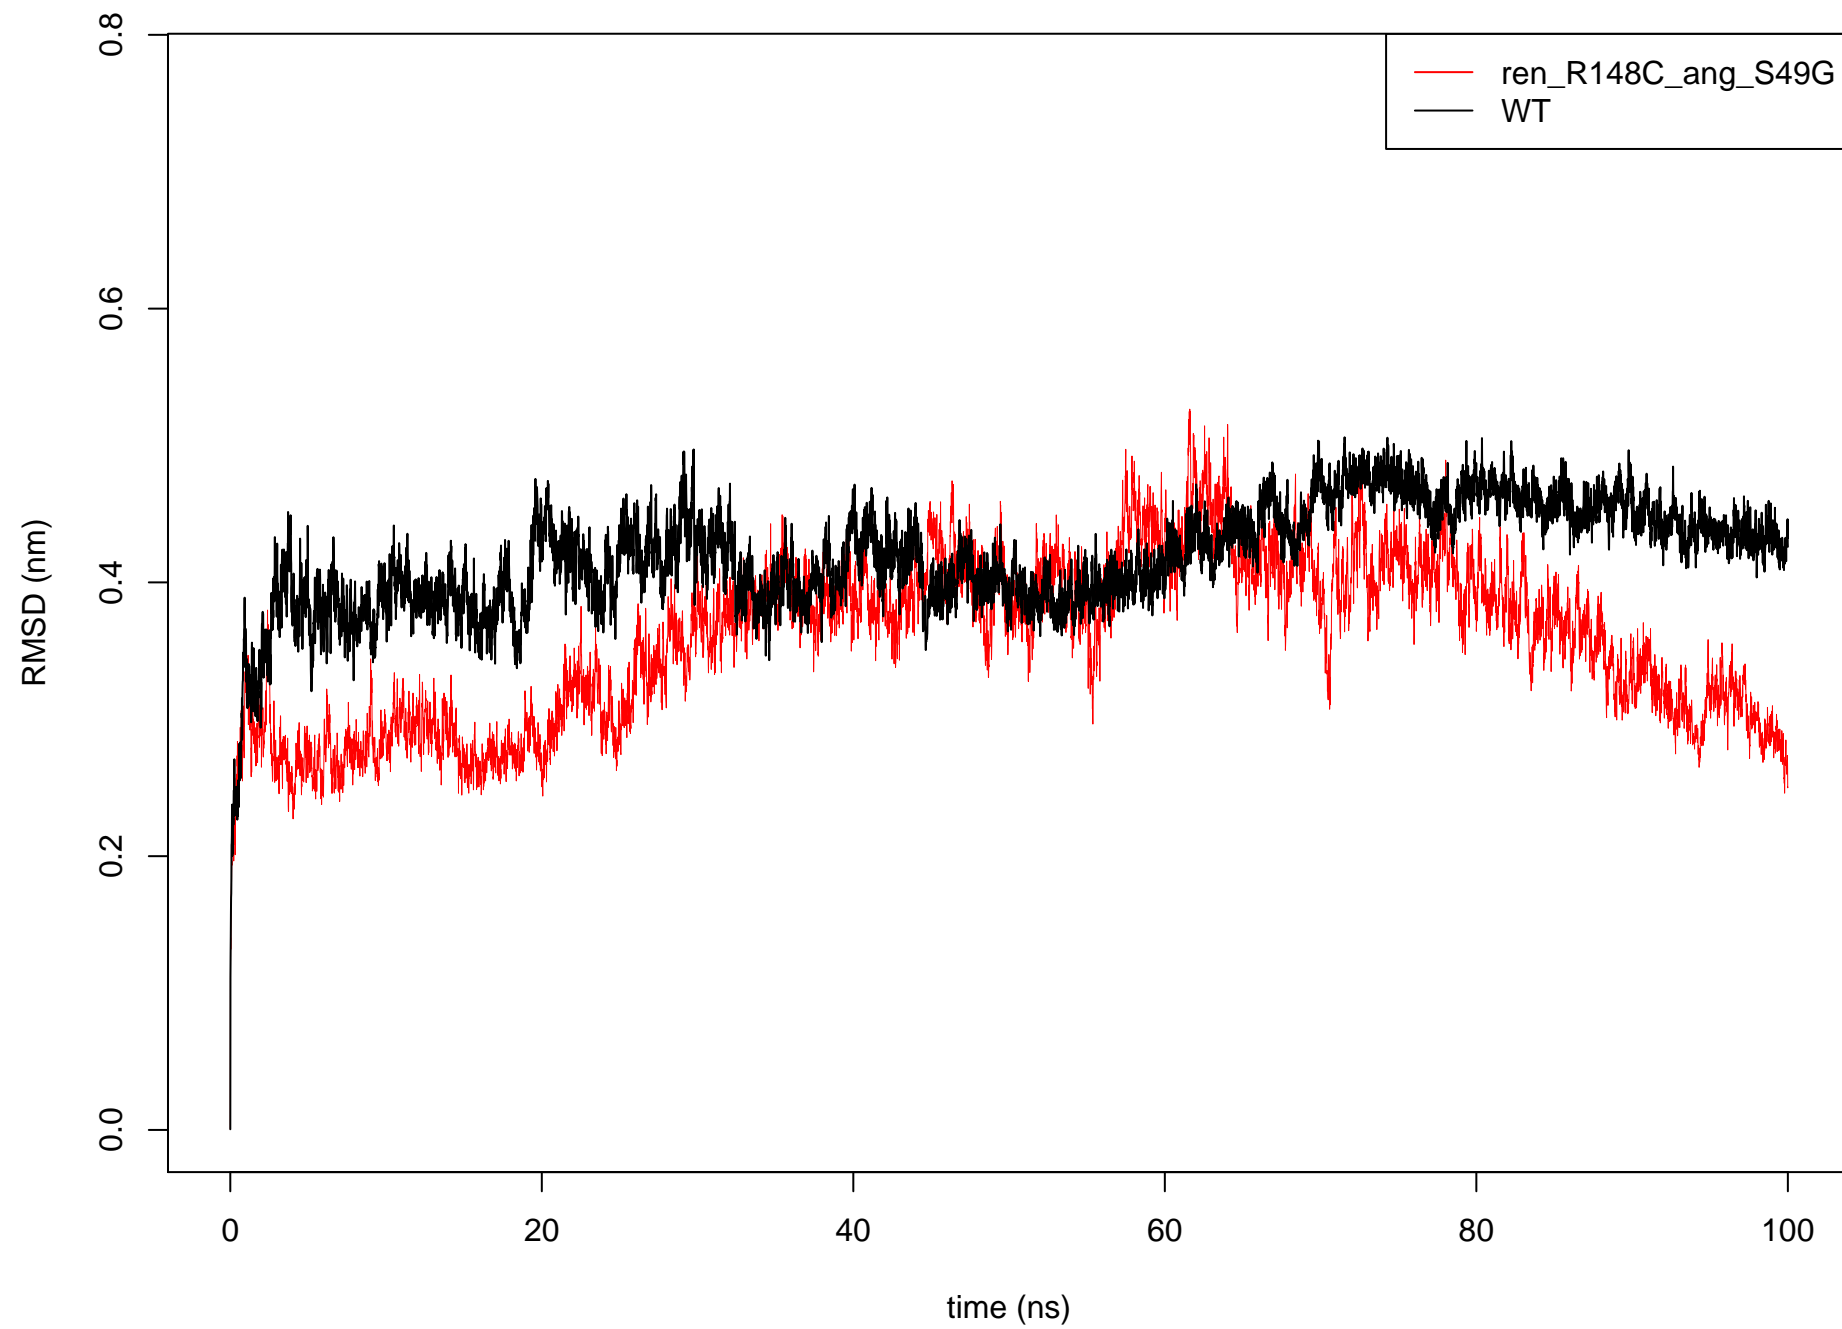

C alpha RMSD: ren\_R148C\_ang\_S49N vs WT

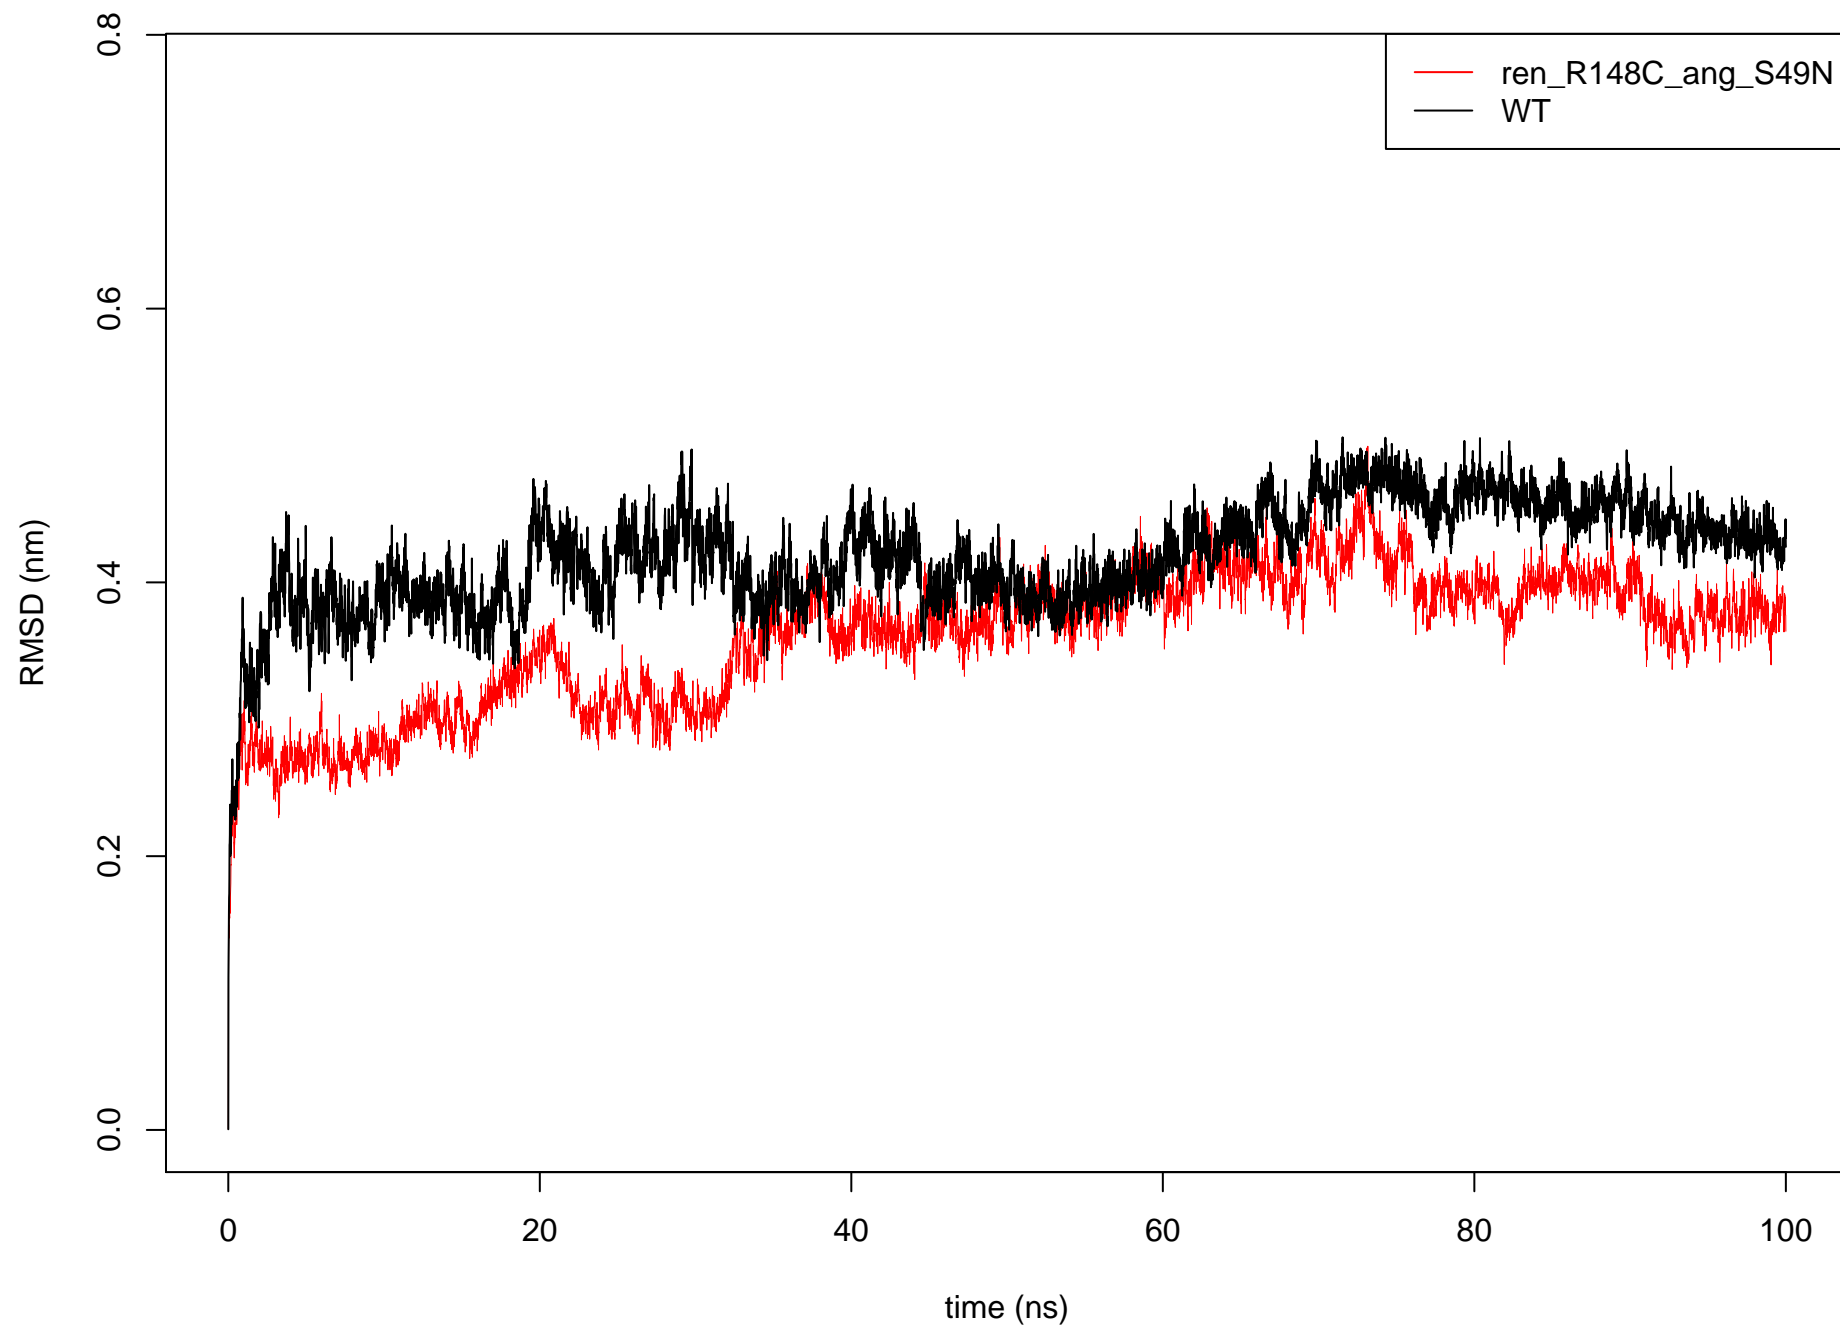

C alpha RMSD: ren\_R148C vs WT

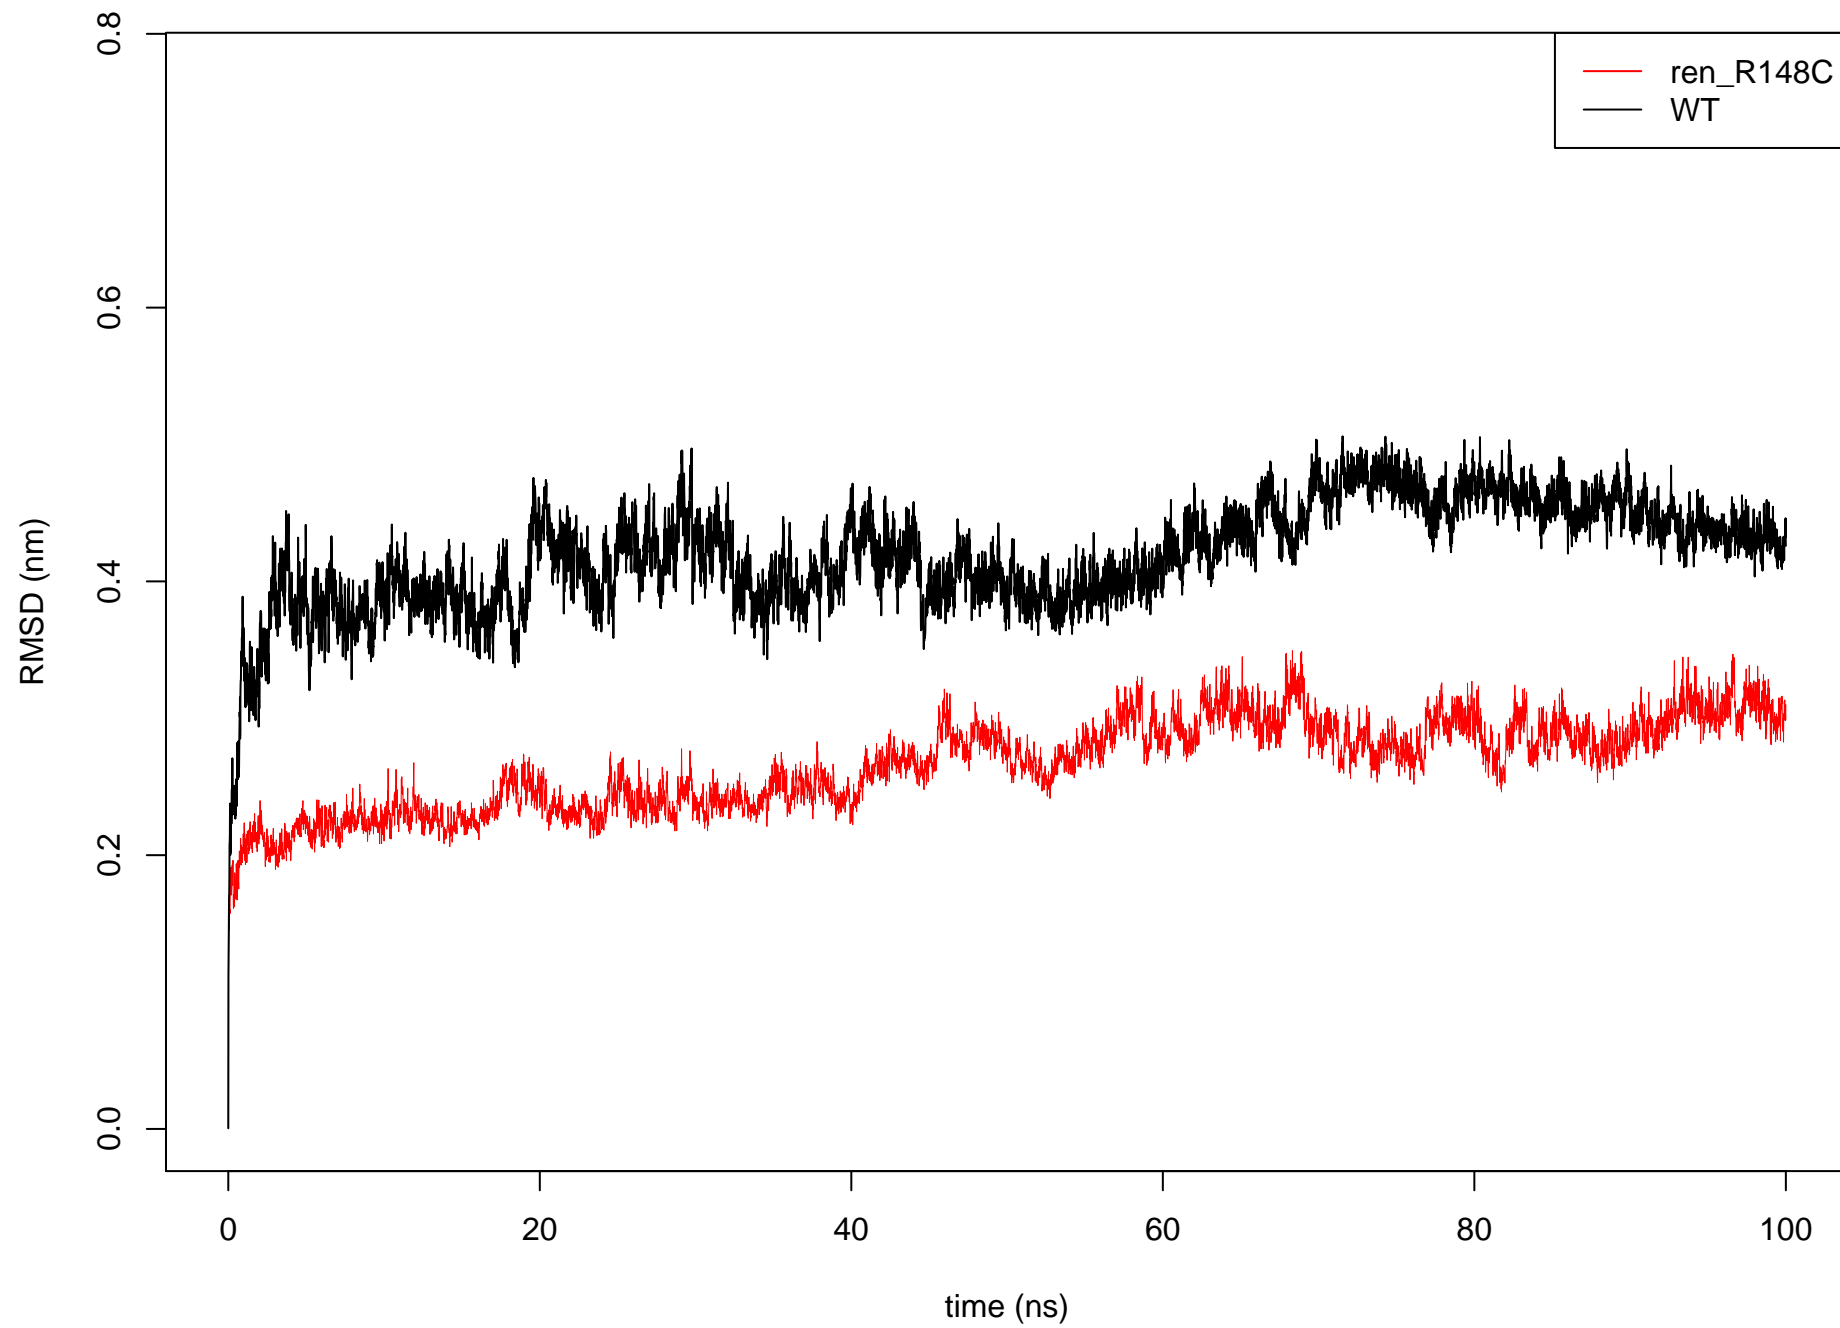

C alpha RMSD: ren\_R148H\_ang\_E48K vs WT

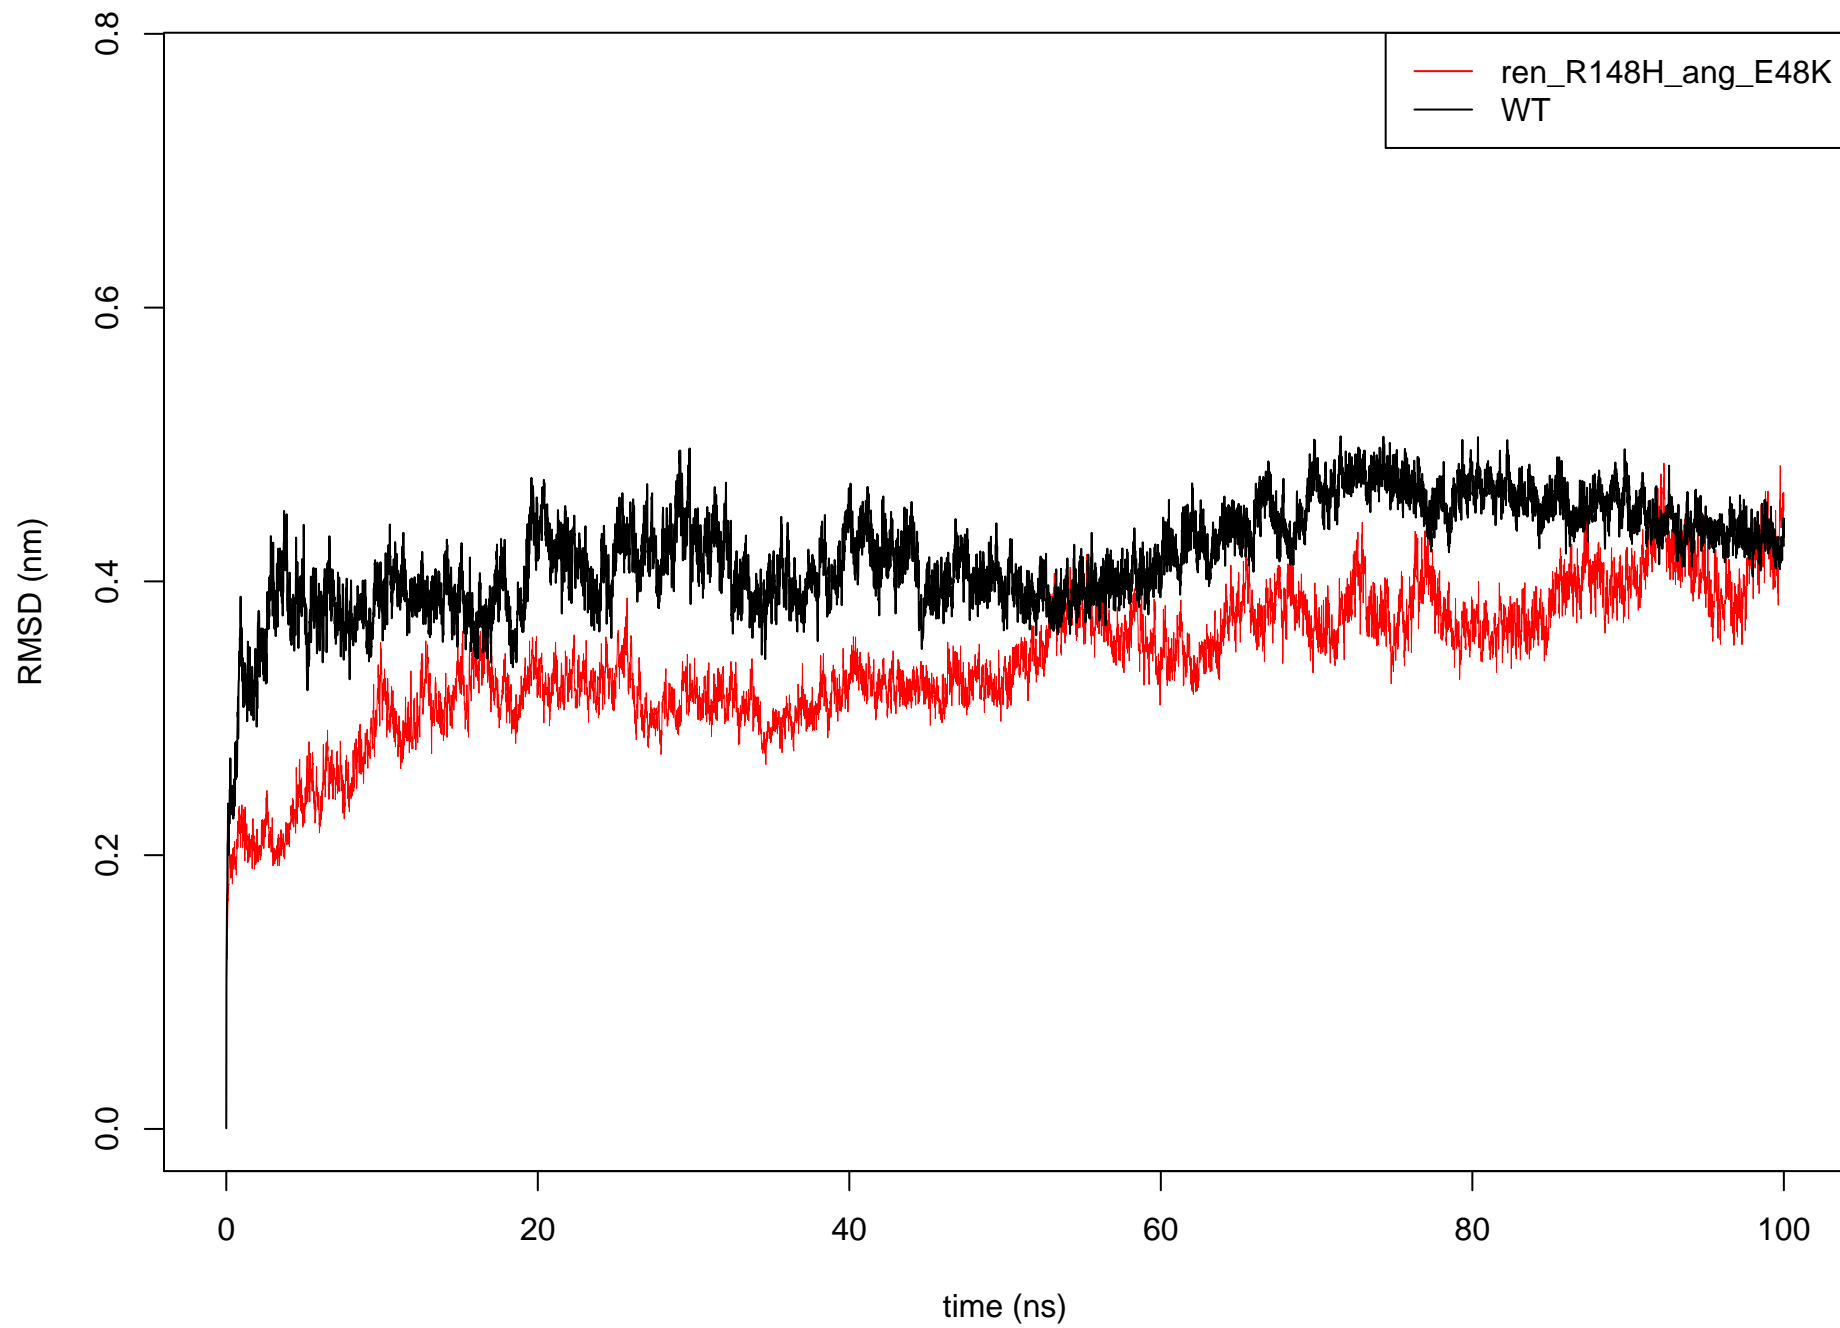

C alpha RMSD: ren\_R148H\_ang\_S49G vs WT

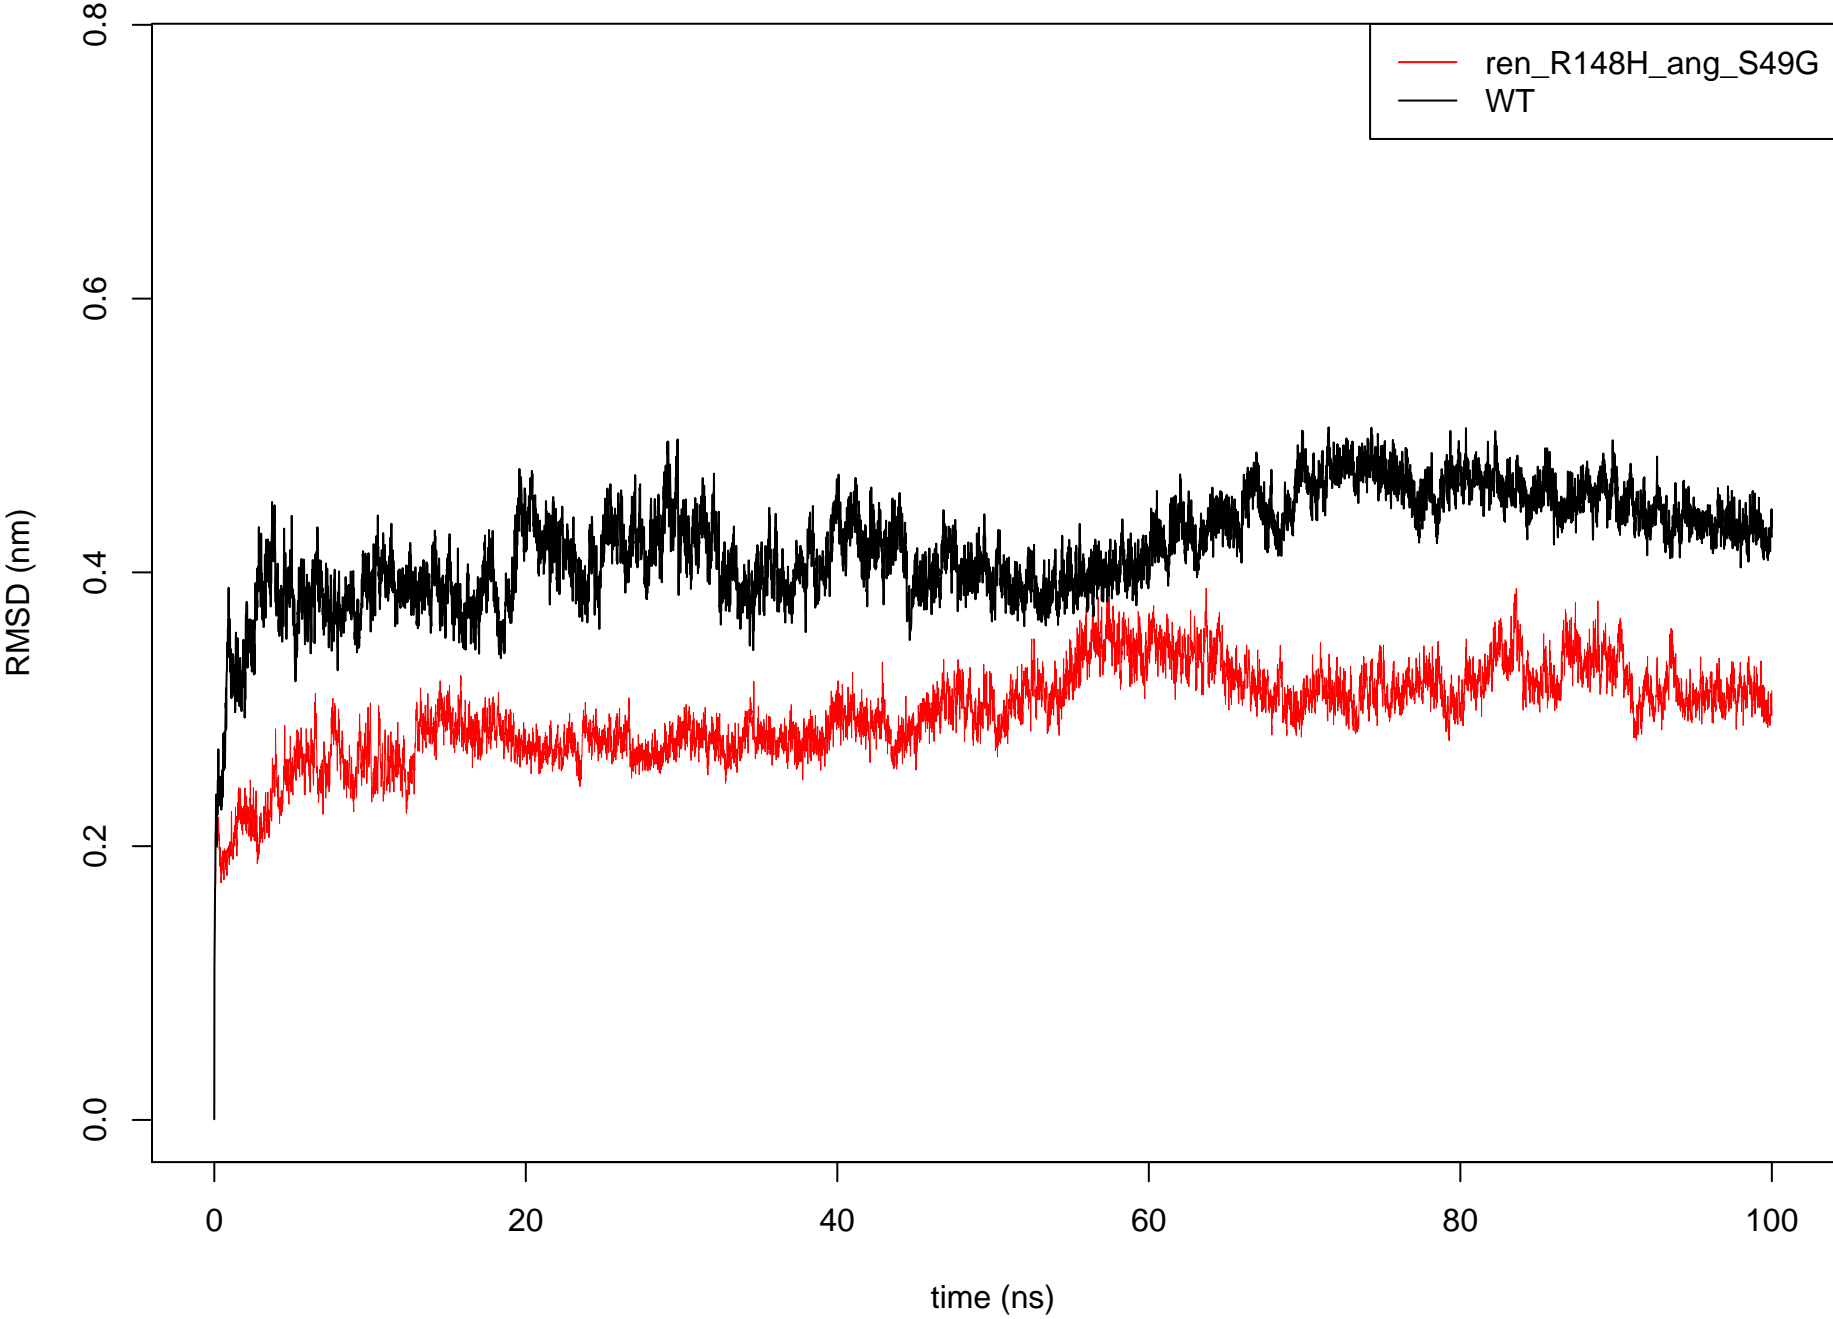

C alpha RMSD: ren\_R148H\_ang\_S49N vs WT

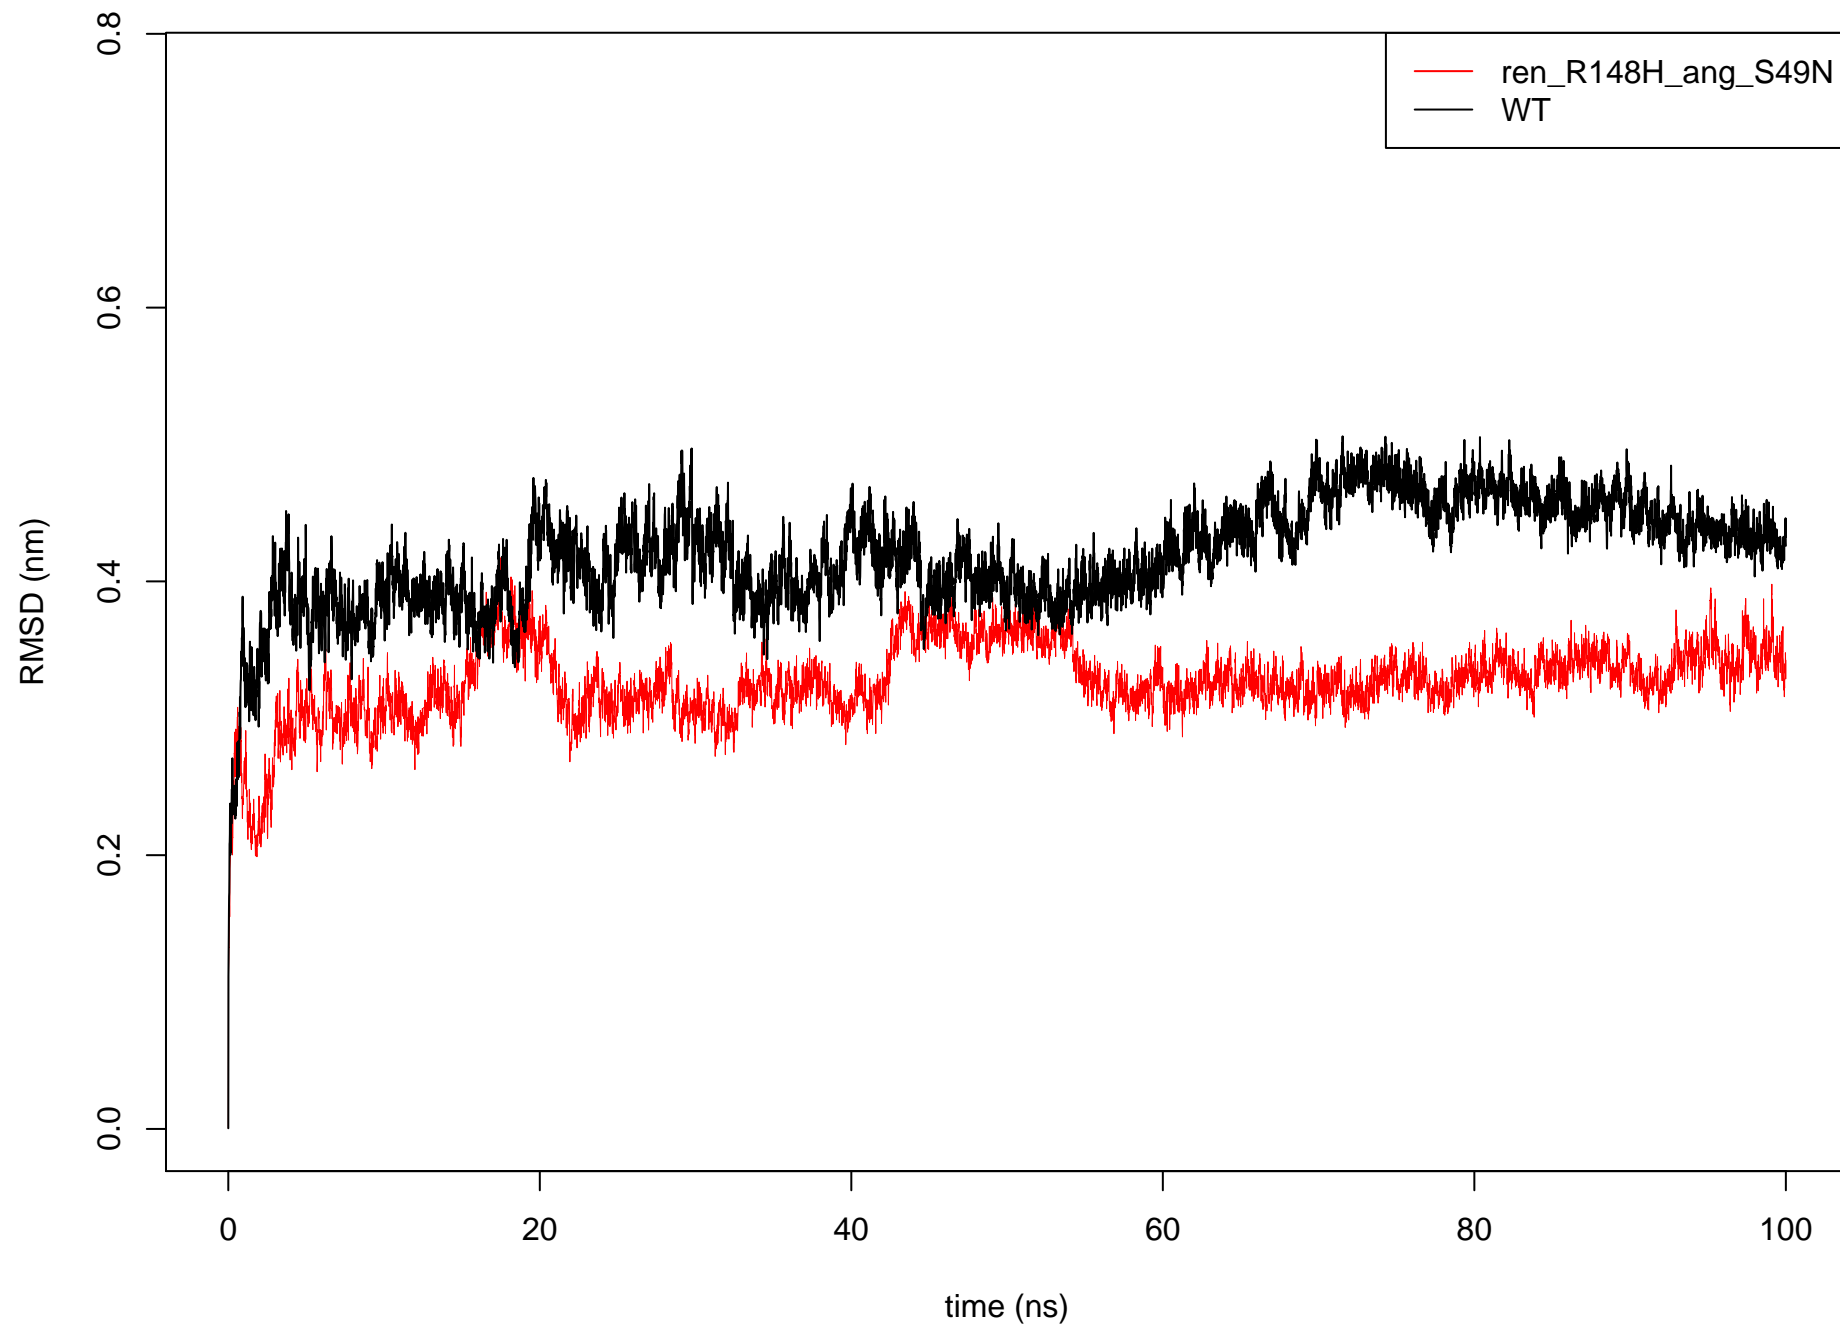

C alpha RMSD: ren\_R148H vs WT

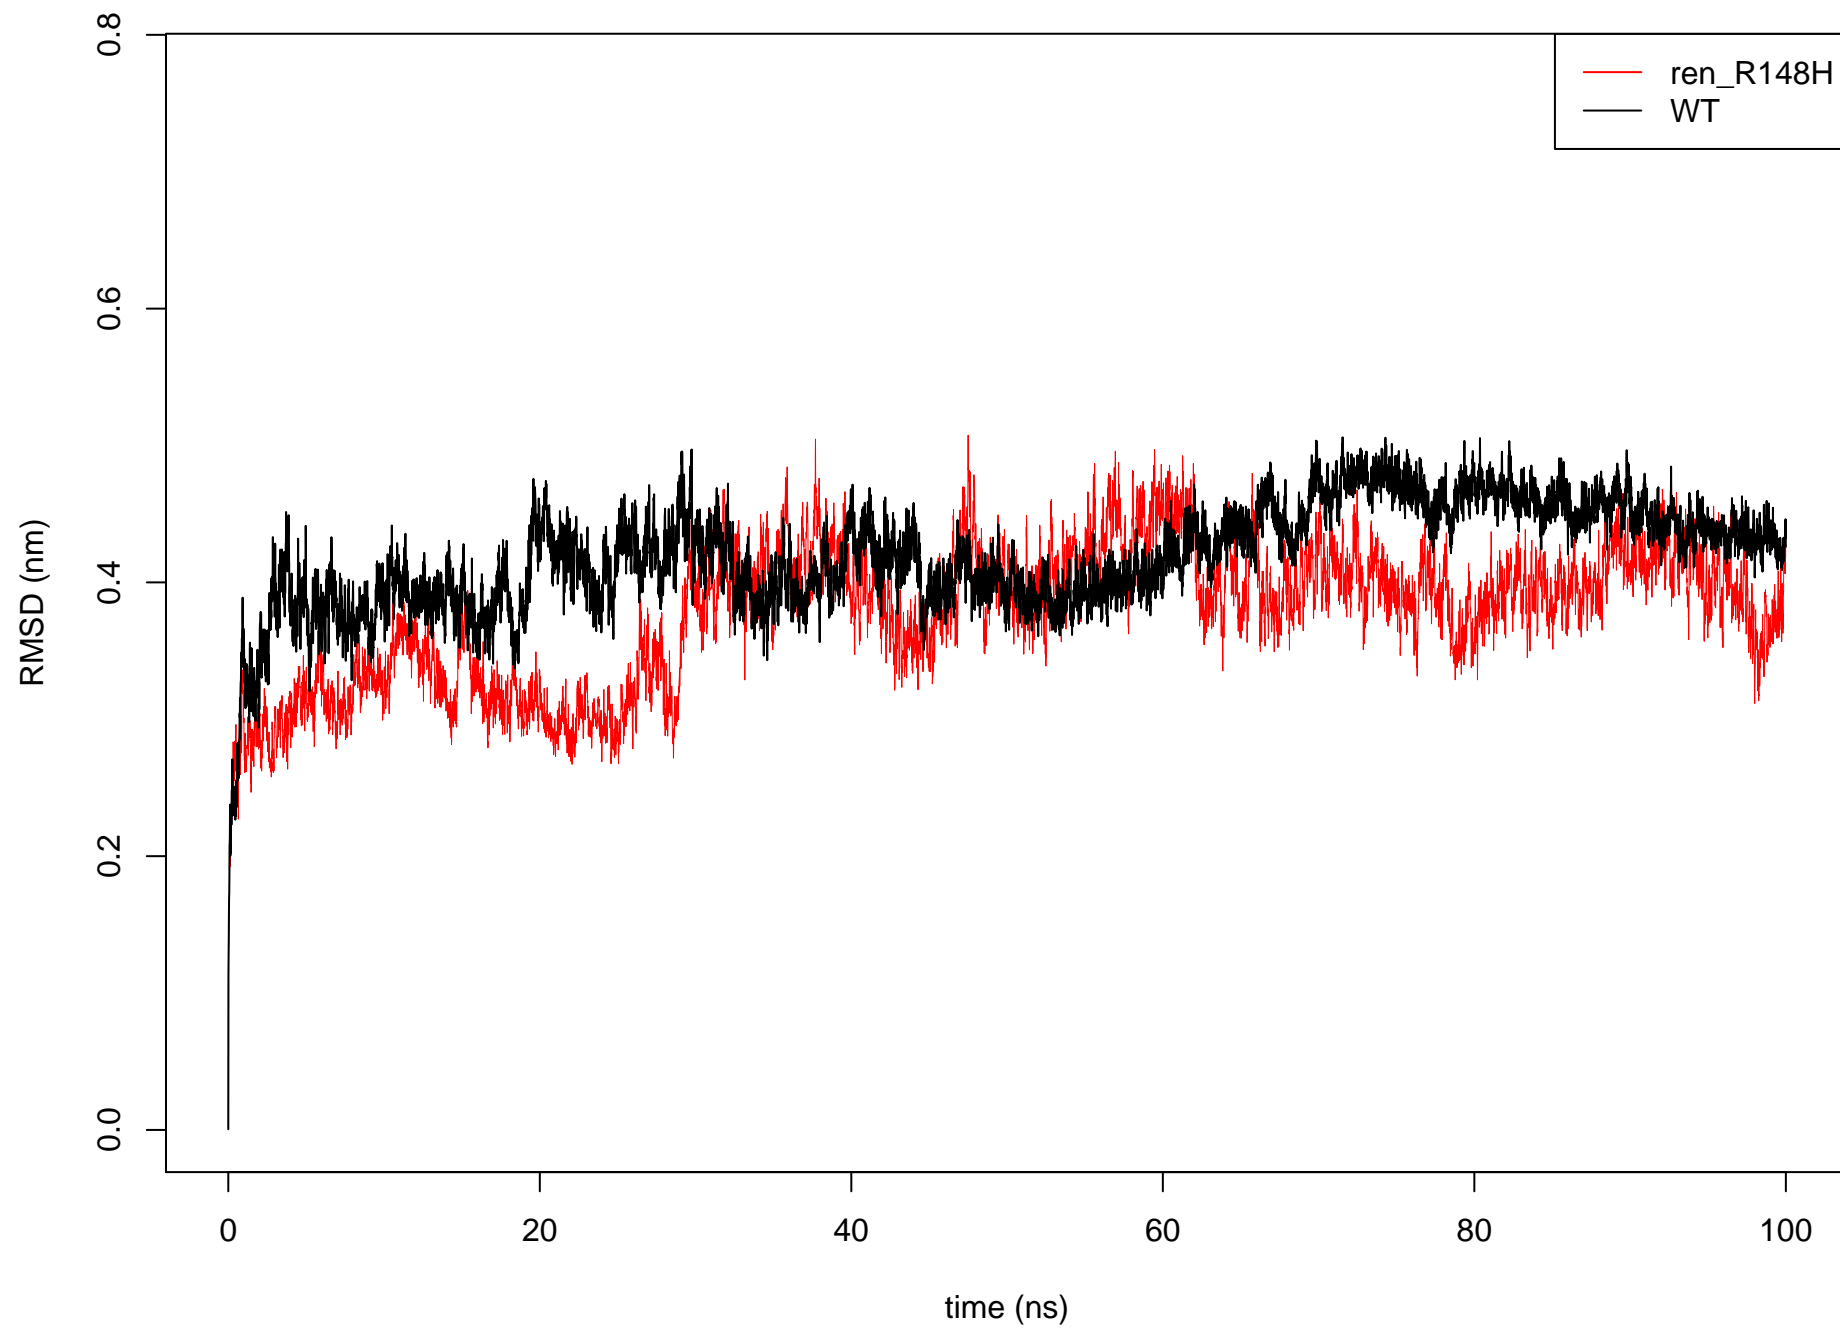

Supplement: NIHMS846845-supplement-3.pdf [file NIHMS846845-supplement-3.pdf]
