# Supplementary material
Source: PubMed Central journal article supplement (PMC5583000)

**RMS fluctuations: ang\_A104T (chain A) vs WT**

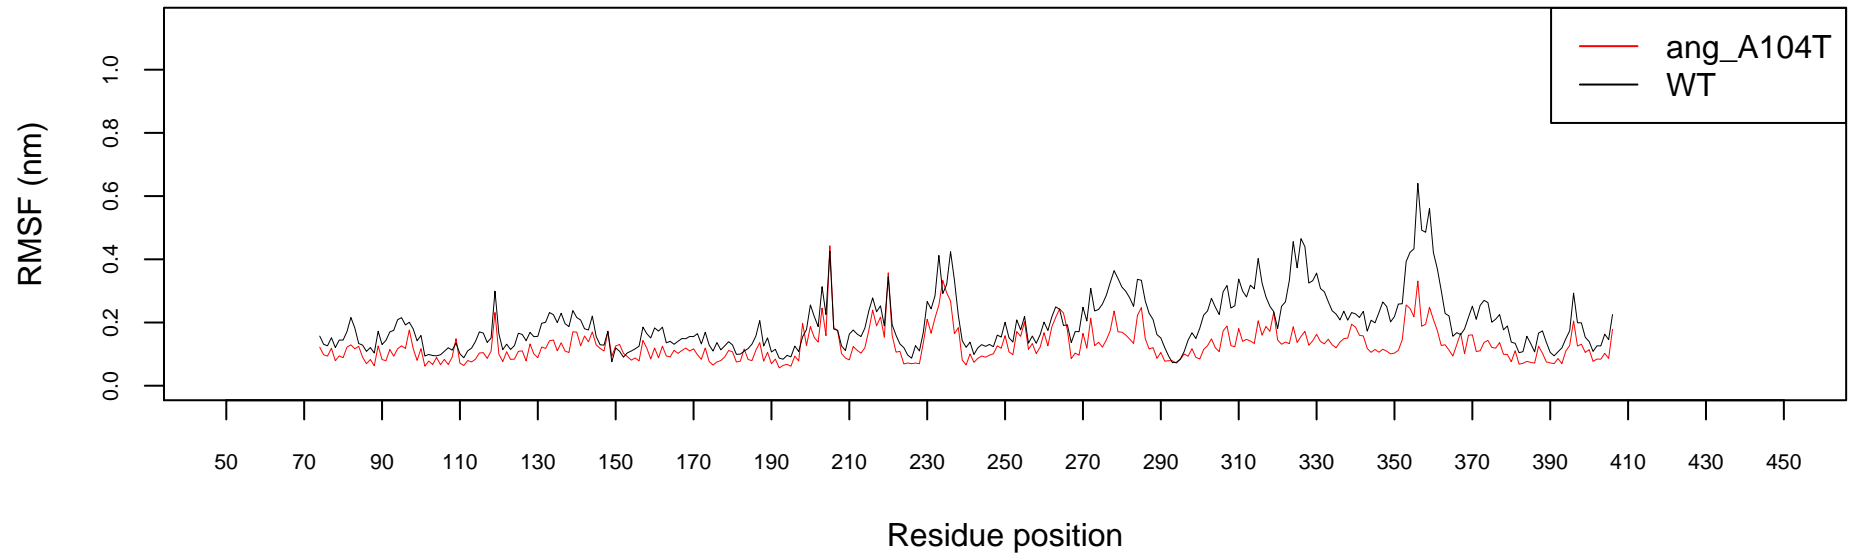

**RMS fluctuations: ang\_A104T (chain B) vs WT**

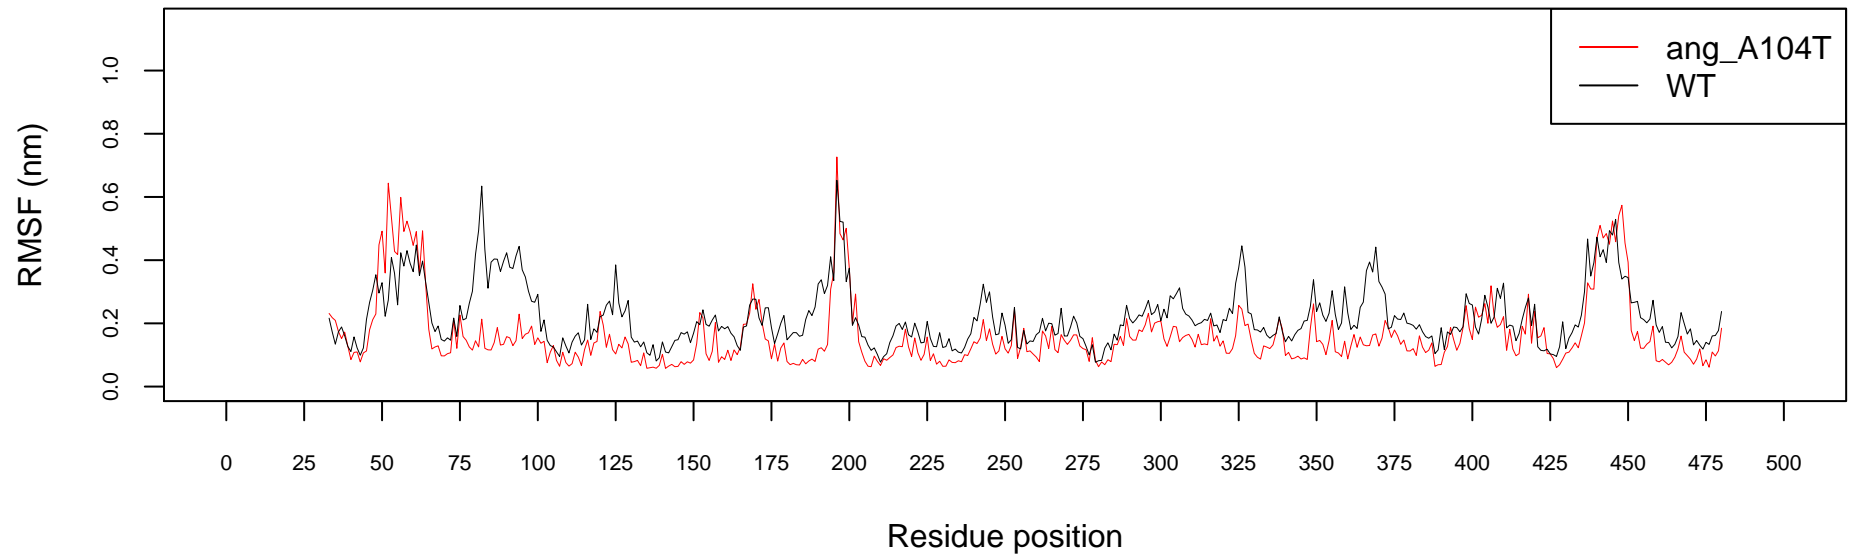

**RMS fluctuations: ang\_D168Y (chain A) vs WT**

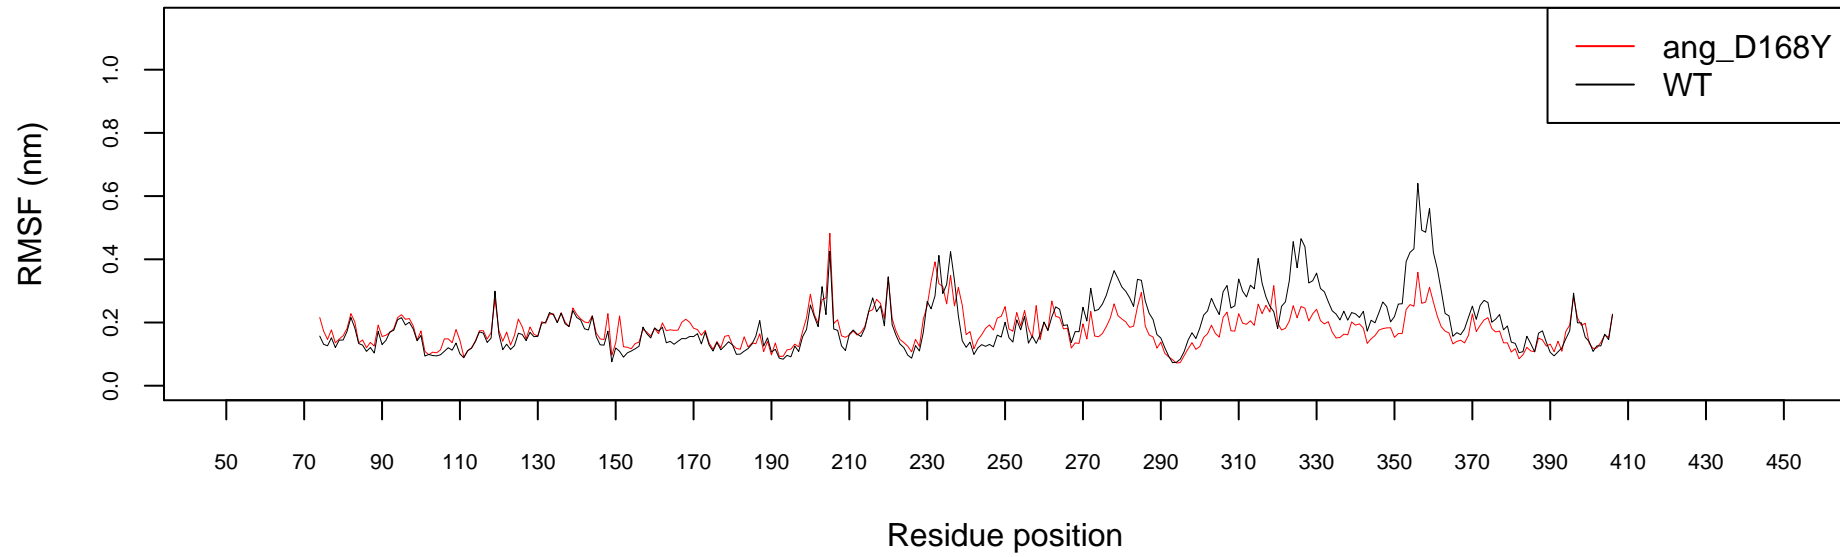

**RMS fluctuations: ang\_D168Y (chain B) vs WT**

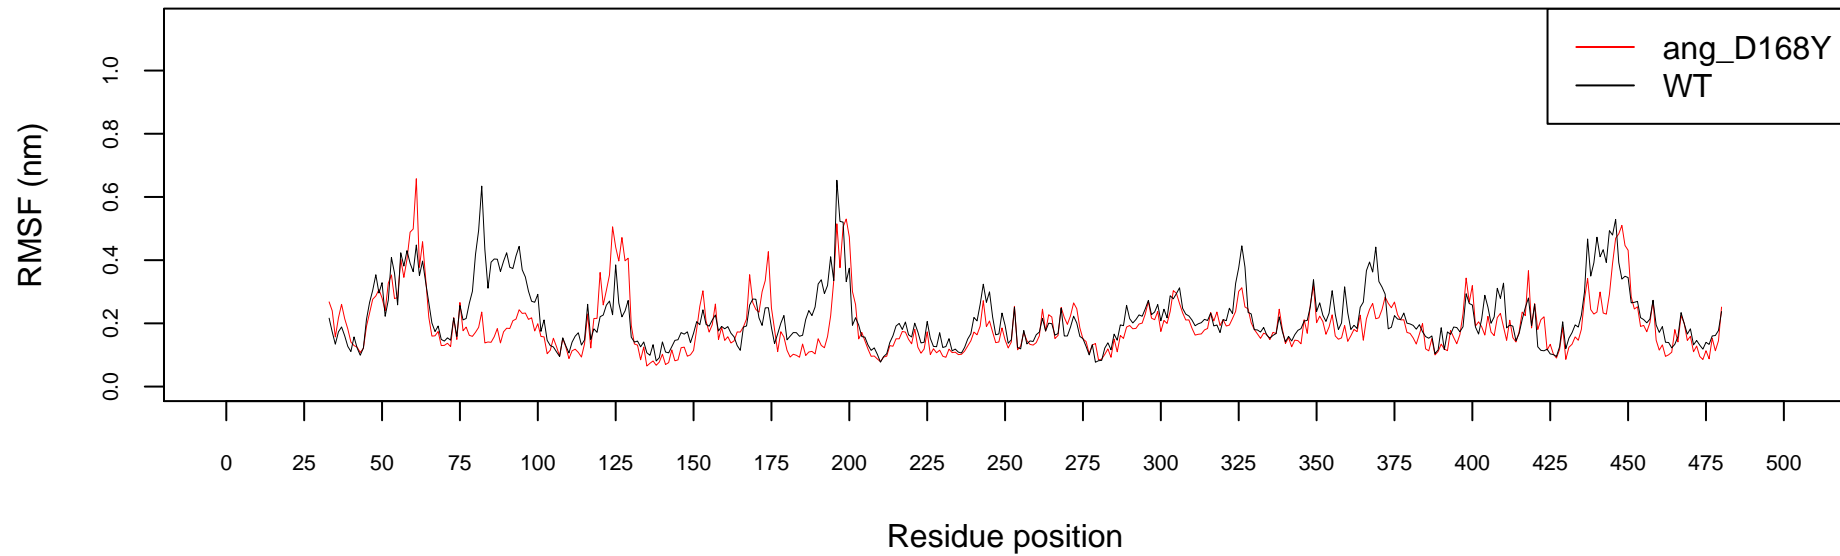

**RMS fluctuations: ang\_E48K (chain A) vs WT**

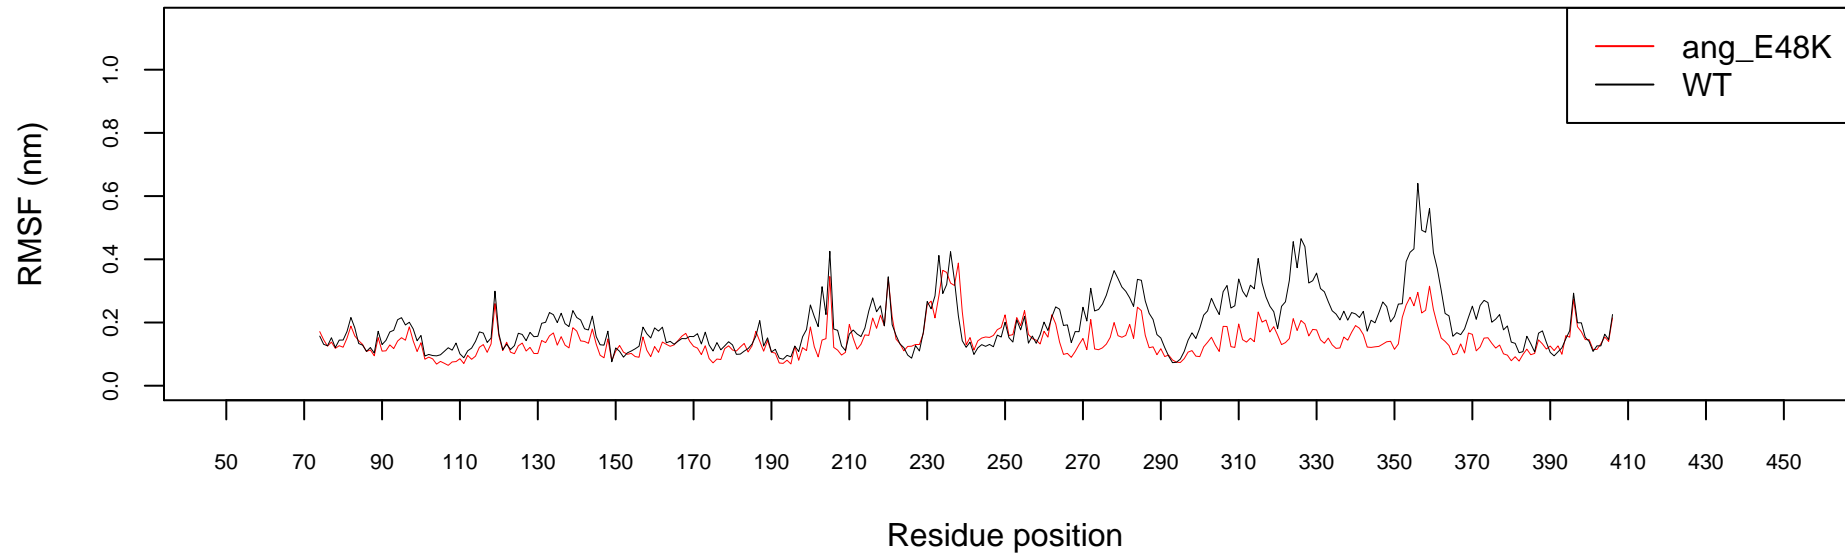

**RMS fluctuations: ang\_E48K (chain B) vs WT**

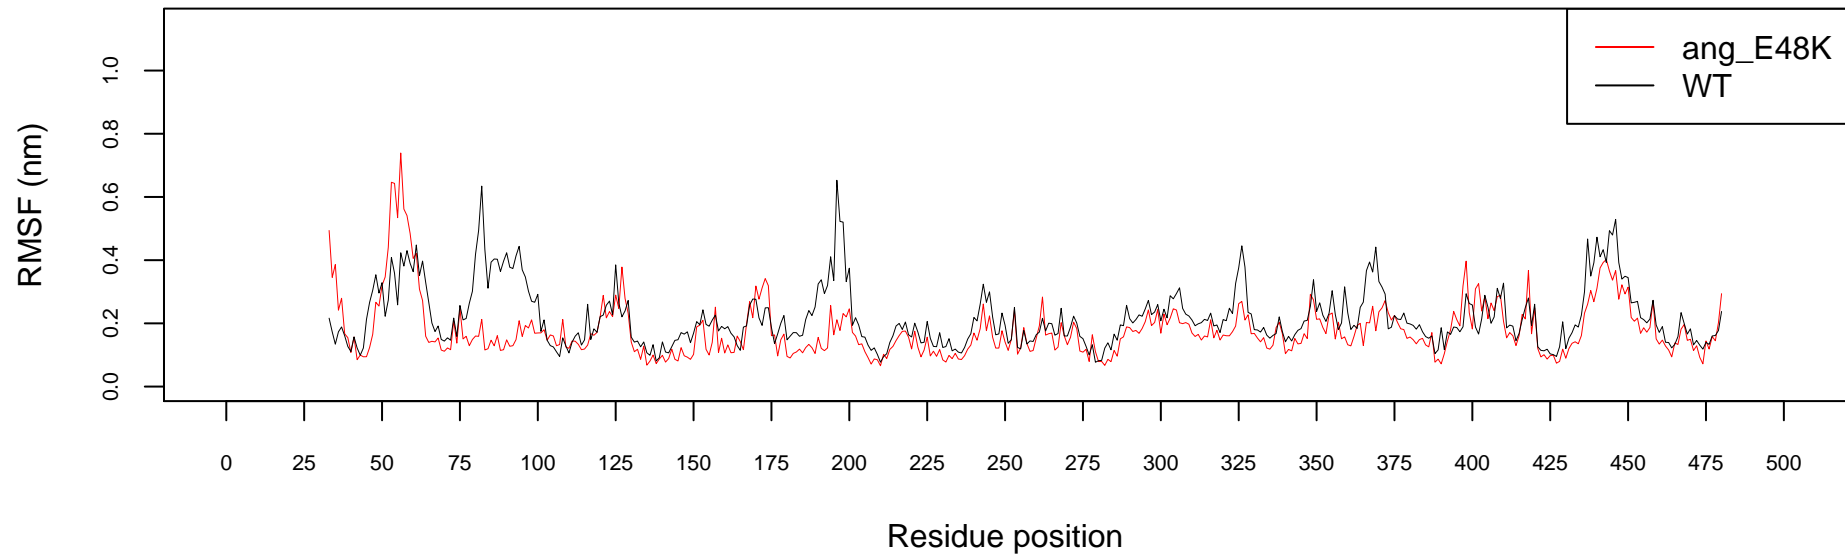

**RMS fluctuations: ang\_H39R (chain A) vs WT**

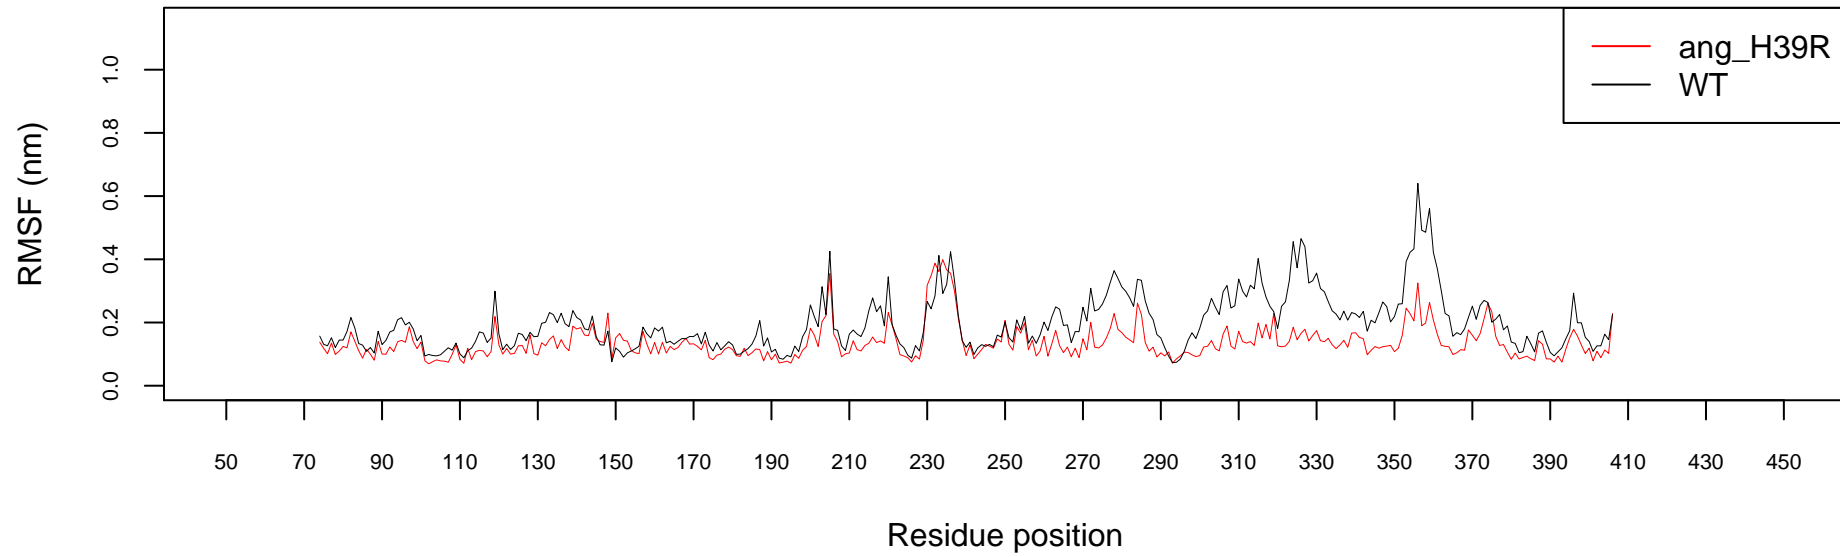

**RMS fluctuations: ang\_H39R (chain B) vs WT**

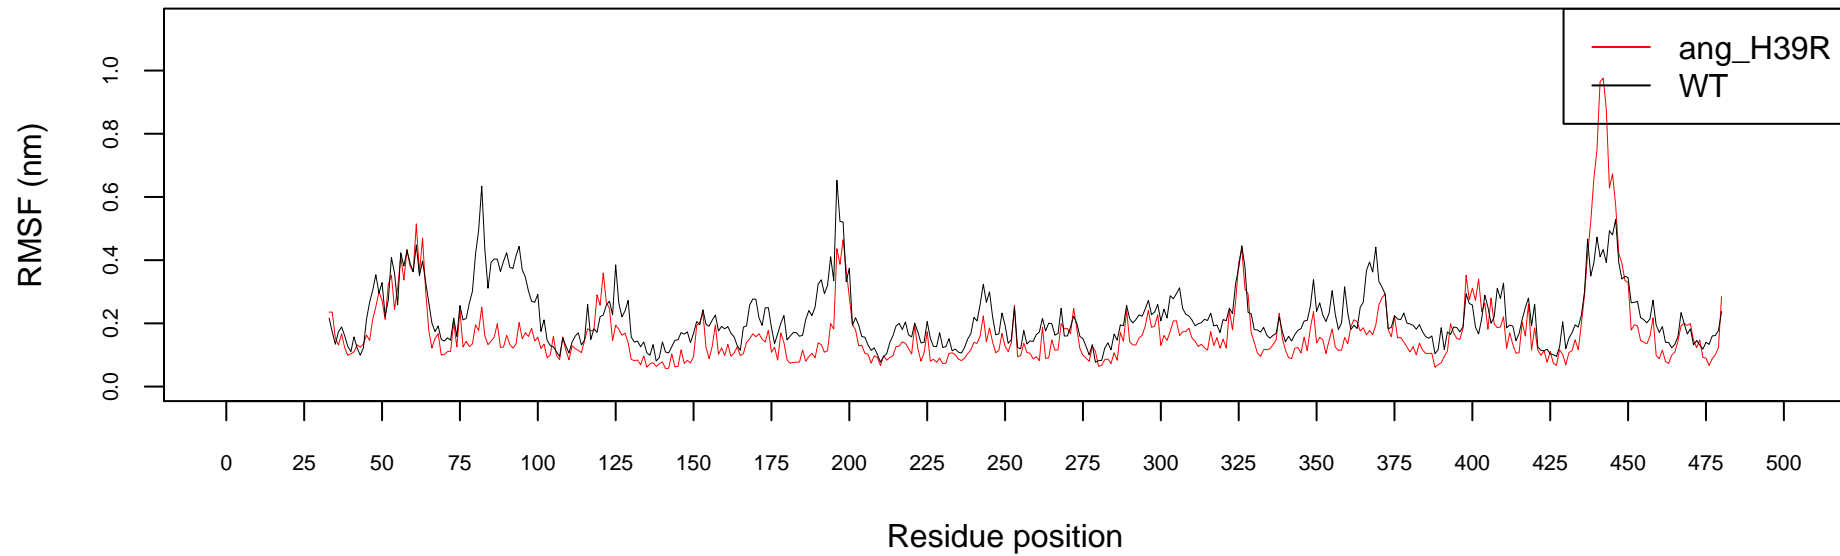

**RMS fluctuations: ang\_L43F (chain A) vs WT**

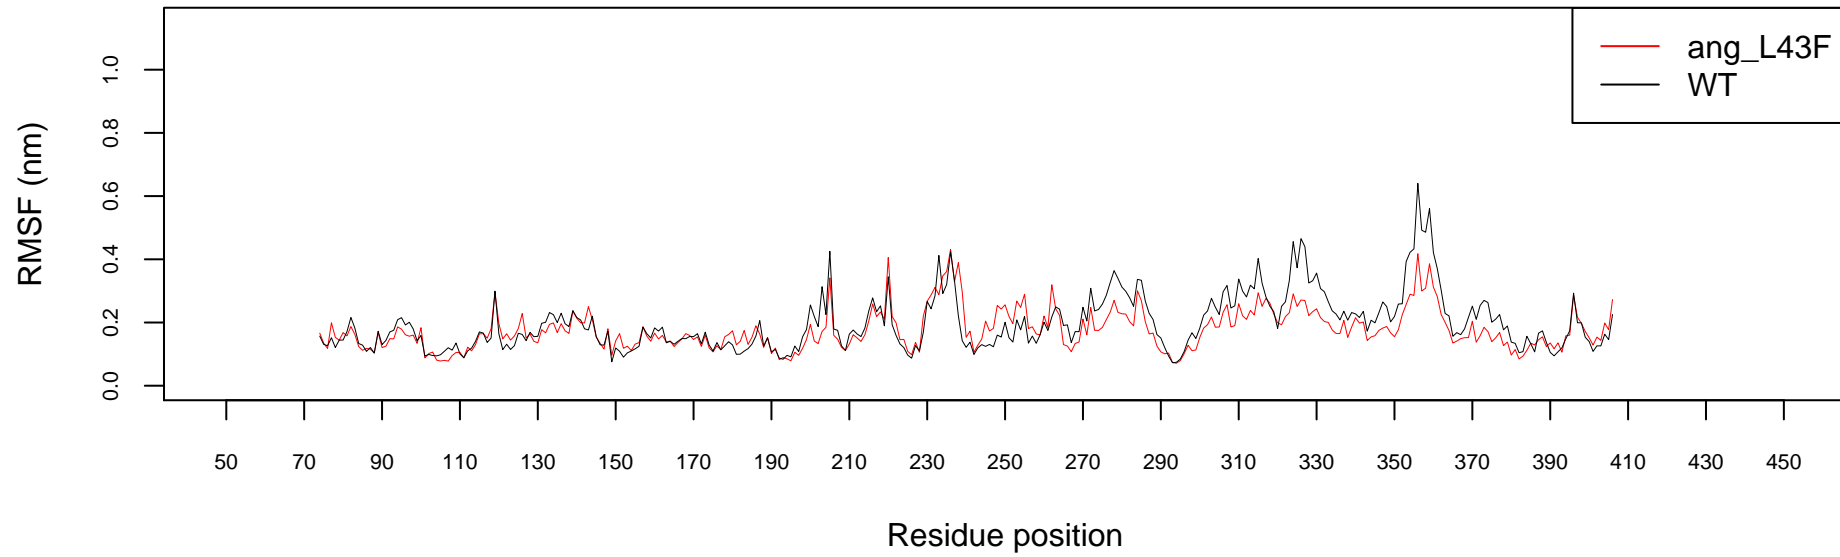

**RMS fluctuations: ang\_L43F (chain B) vs WT**

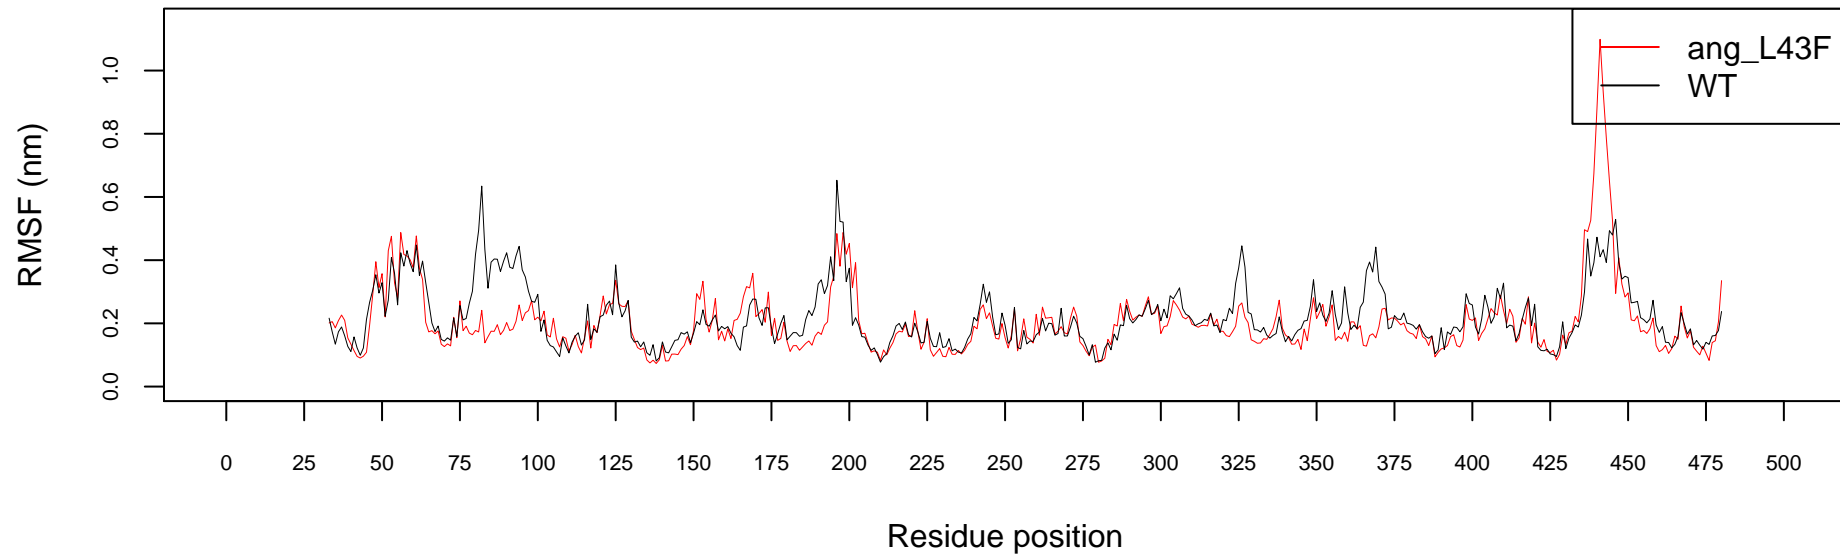

**RMS fluctuations: ang\_M105V (chain A) vs WT**

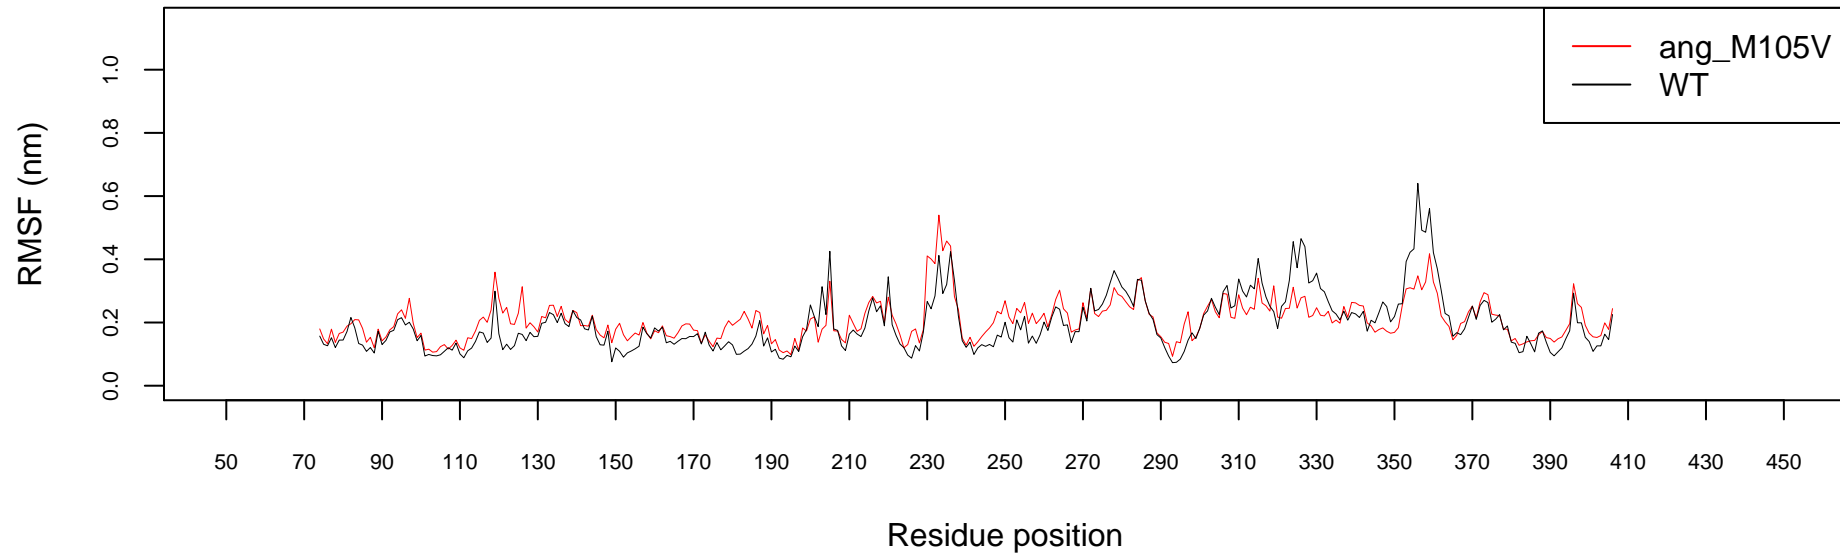

**RMS fluctuations: ang\_M105V (chain B) vs WT**

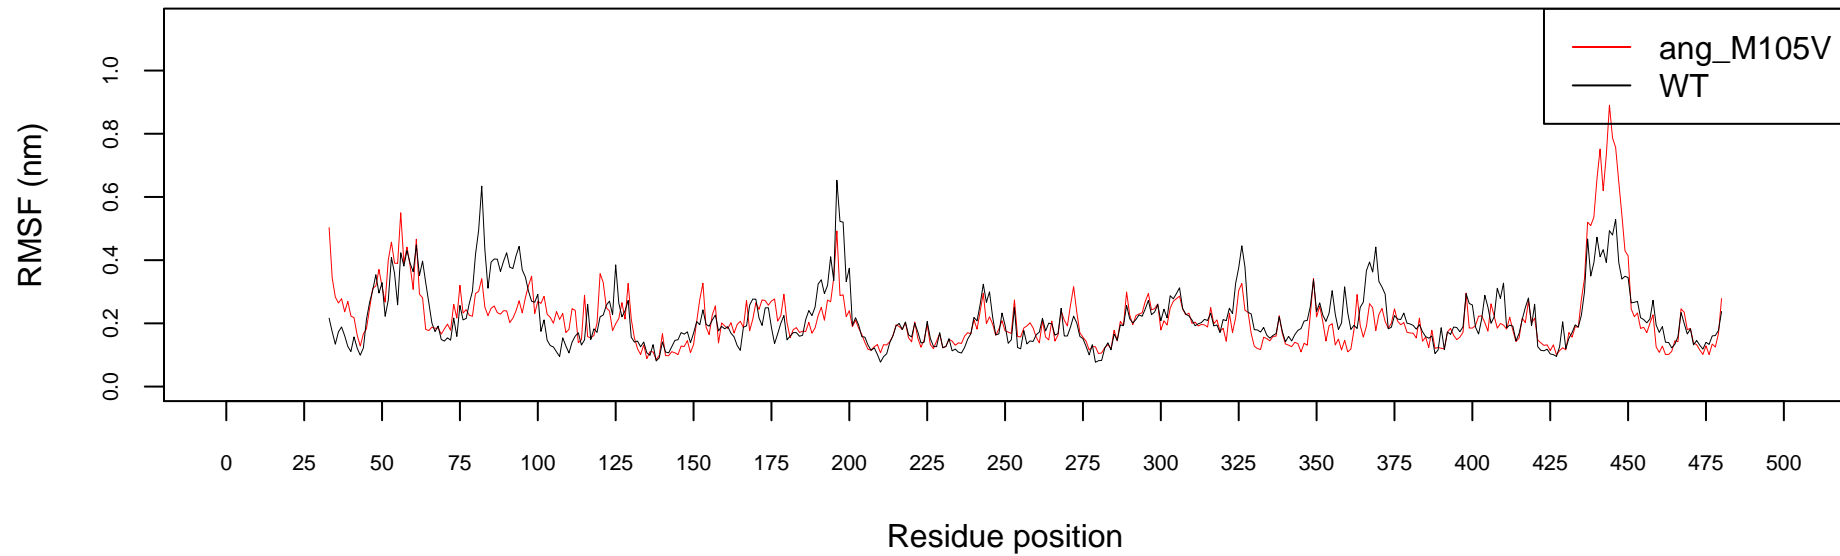

**RMS fluctuations: ang\_P40L (chain A) vs WT**

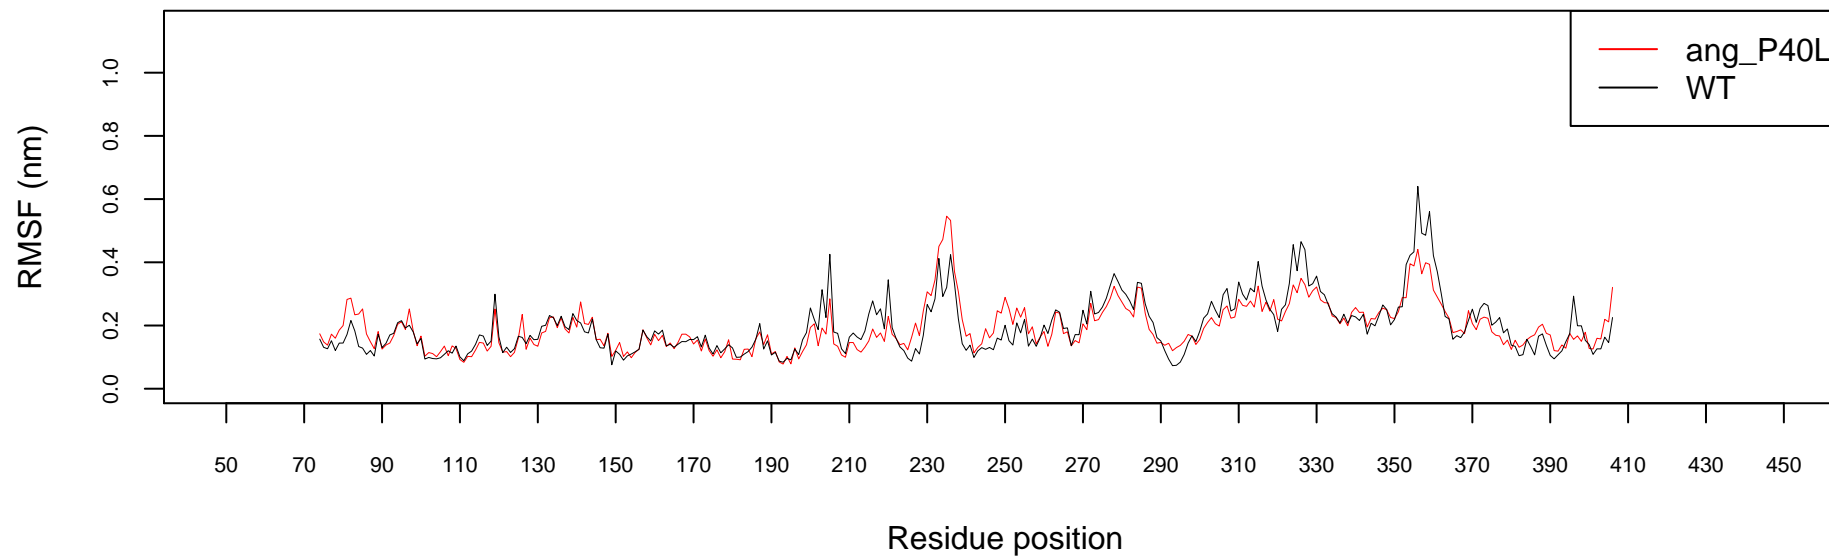

**RMS fluctuations: ang\_P40L (chain B) vs WT**

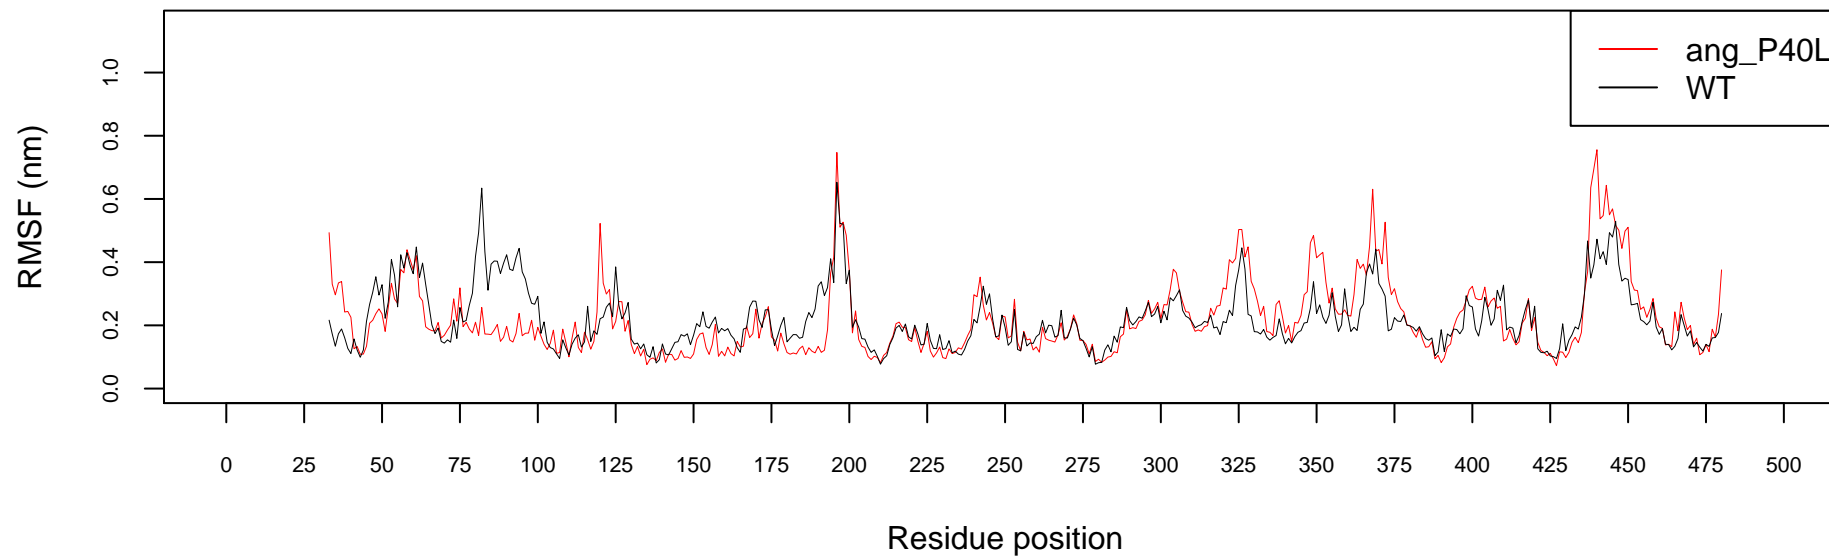

**RMS fluctuations: ang\_S49G (chain A) vs WT**

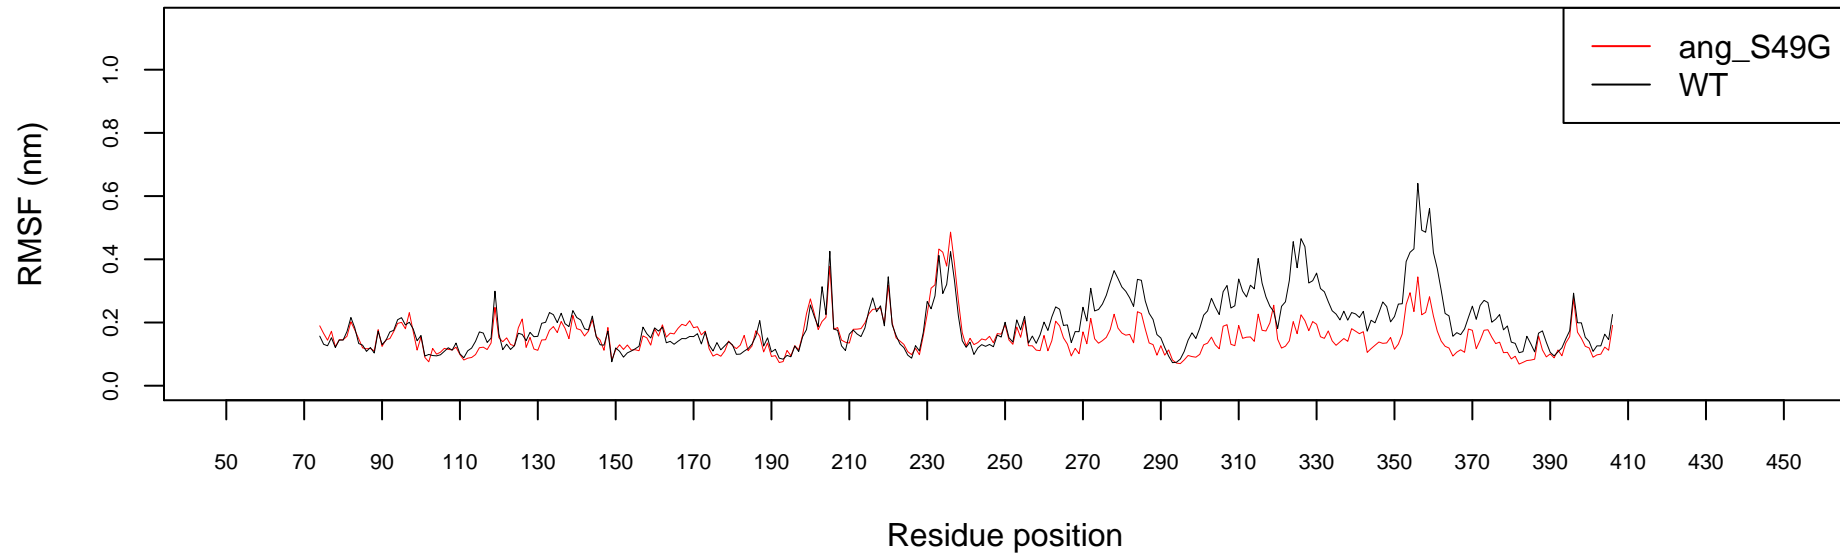

**RMS fluctuations: ang\_S49G (chain B) vs WT**

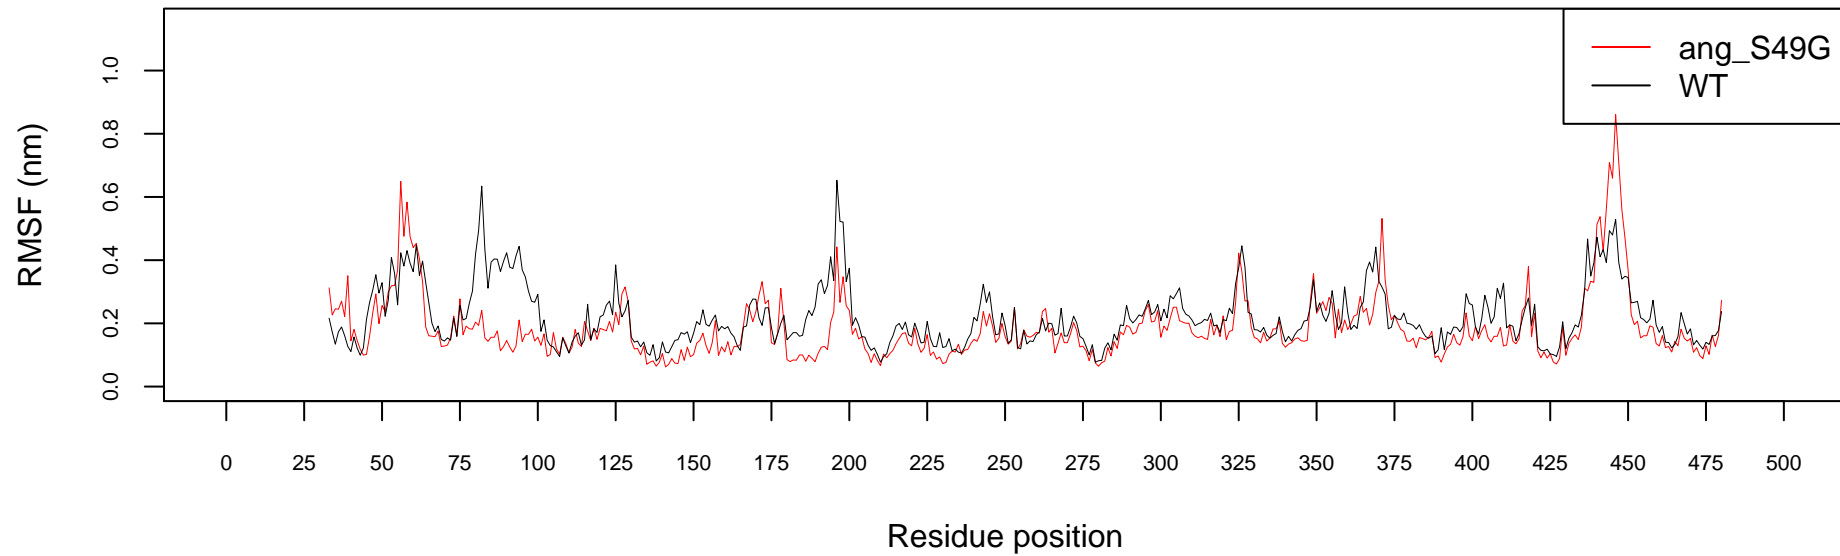



**RMS fluctuations: ang\_S49N (chain A) vs WT**

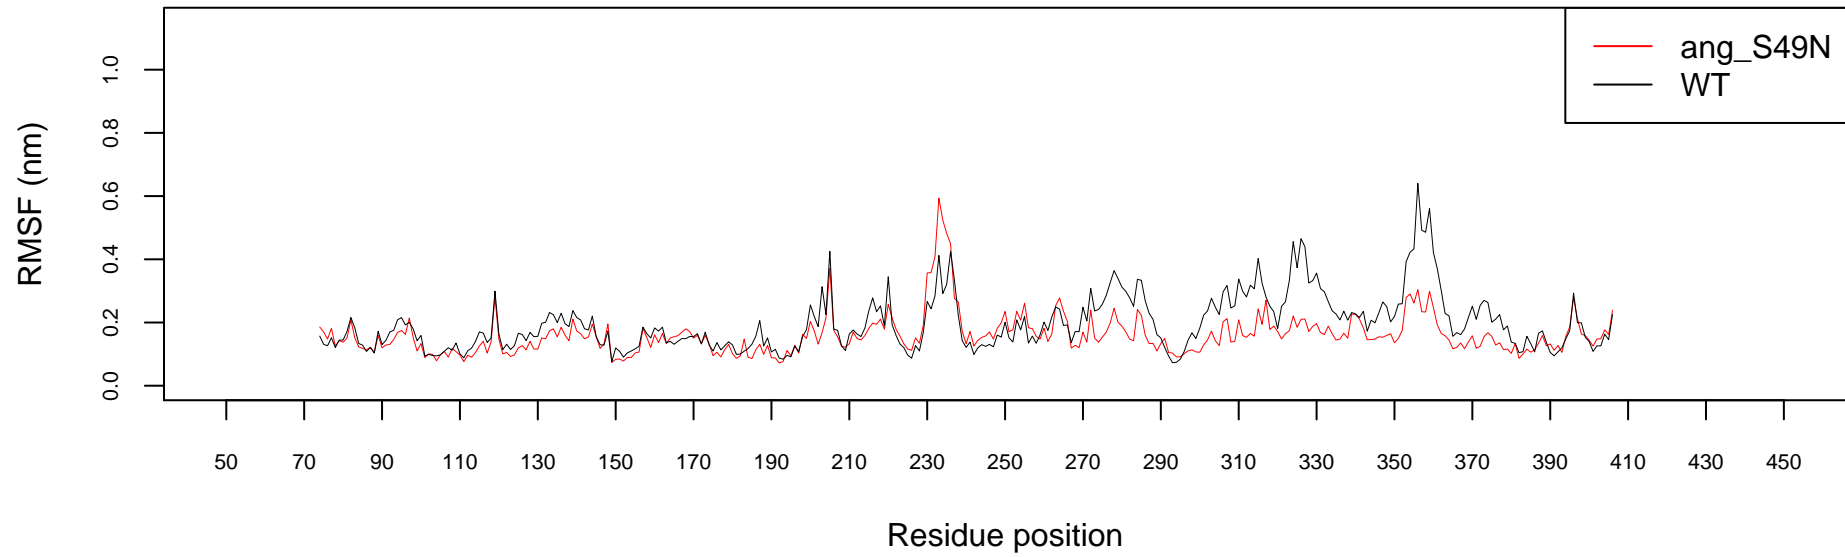

**RMS fluctuations: ang\_S49N (chain B) vs WT**

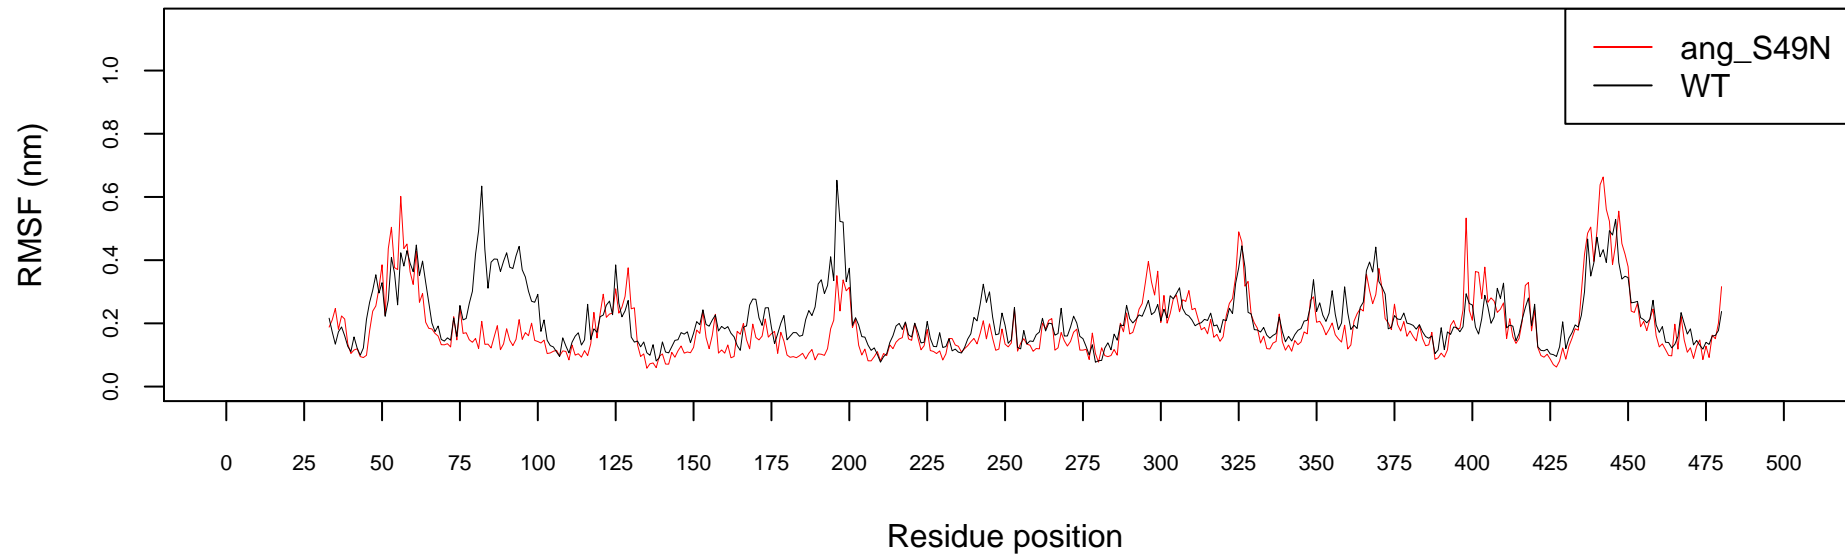

**RMS fluctuations: ren\_A188V (chain A) vs WT**

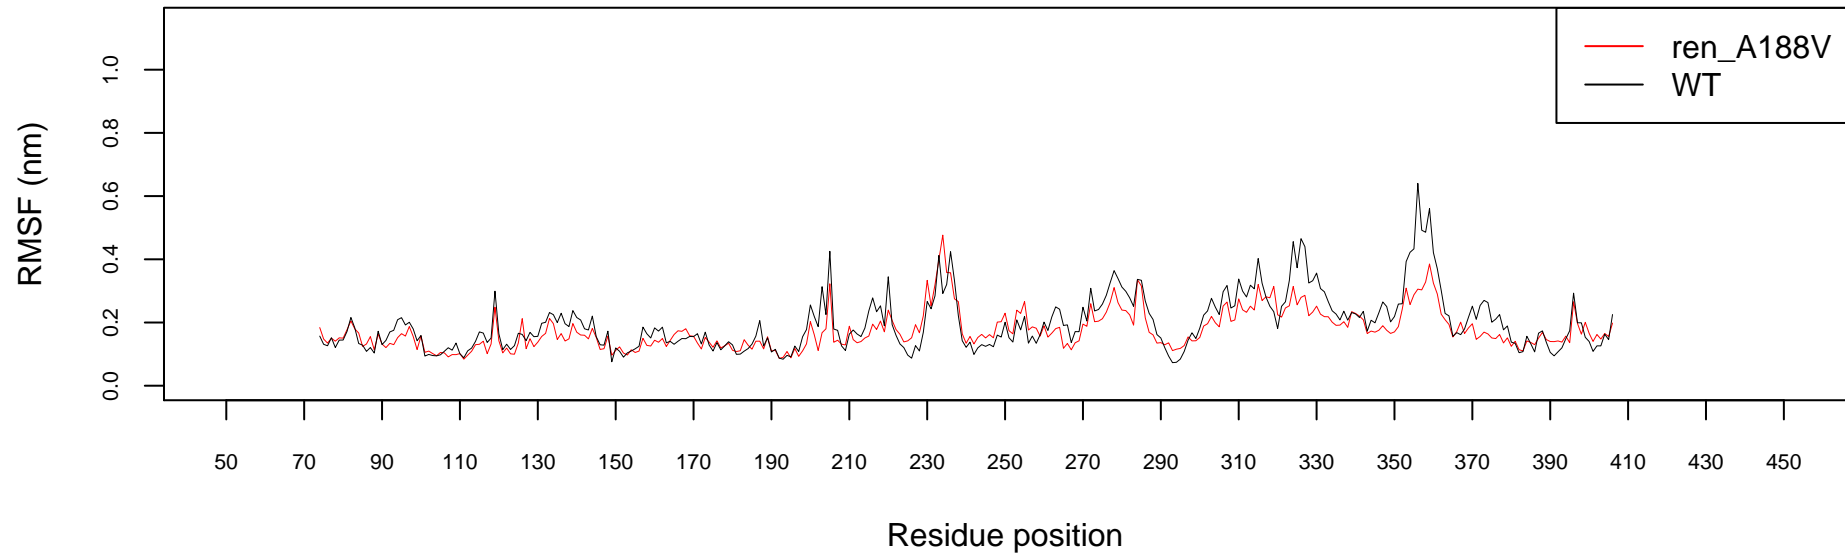

**RMS fluctuations: ren\_A188V (chain B) vs WT**

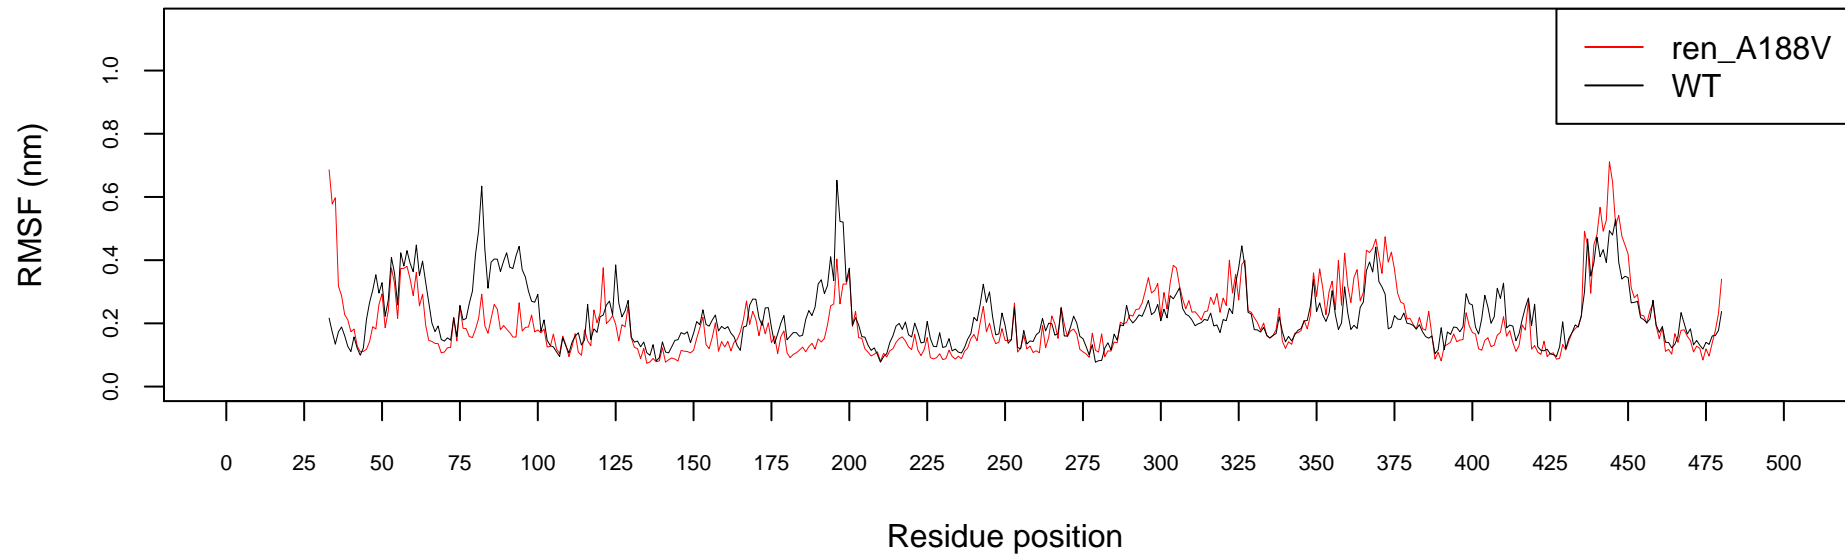

**RMS fluctuations: ren\_D104N\_ang\_L43F (chain A) vs WT**

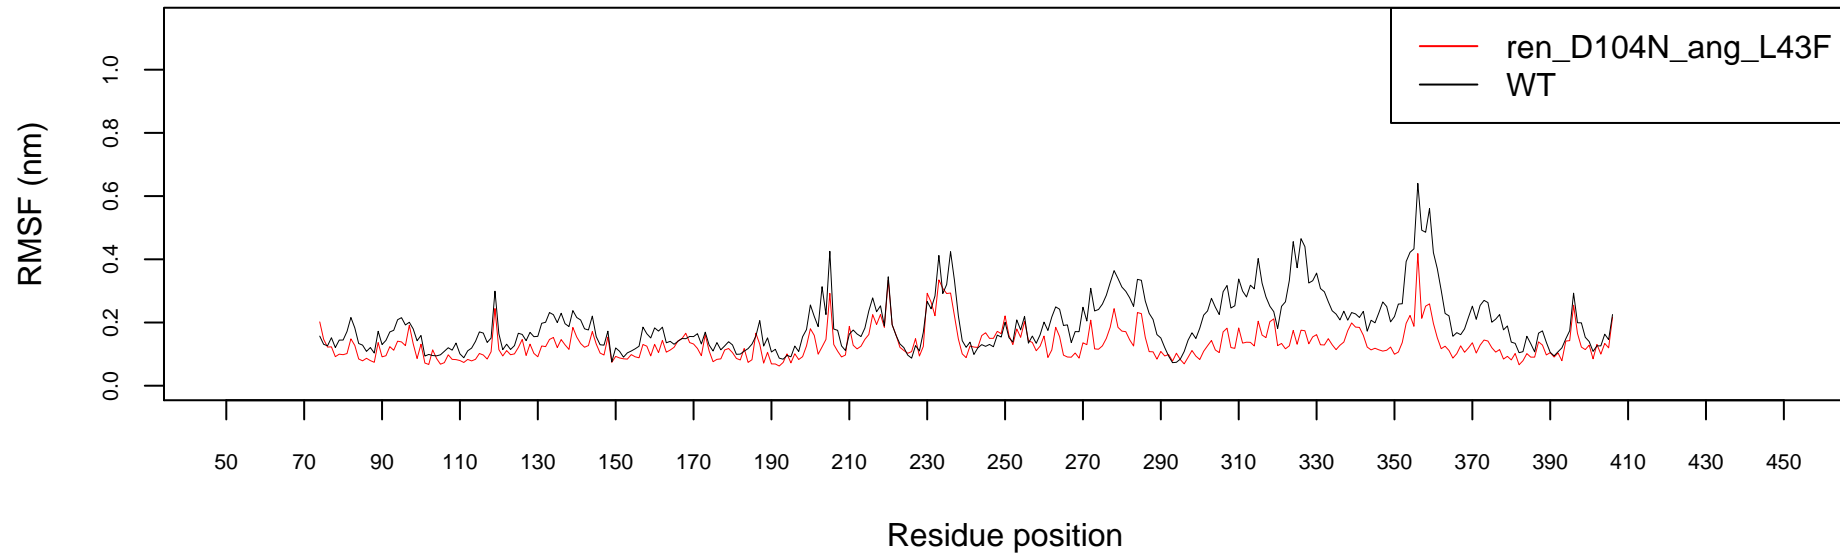

**RMS fluctuations: ren\_D104N\_ang\_L43F (chain B) vs WT**

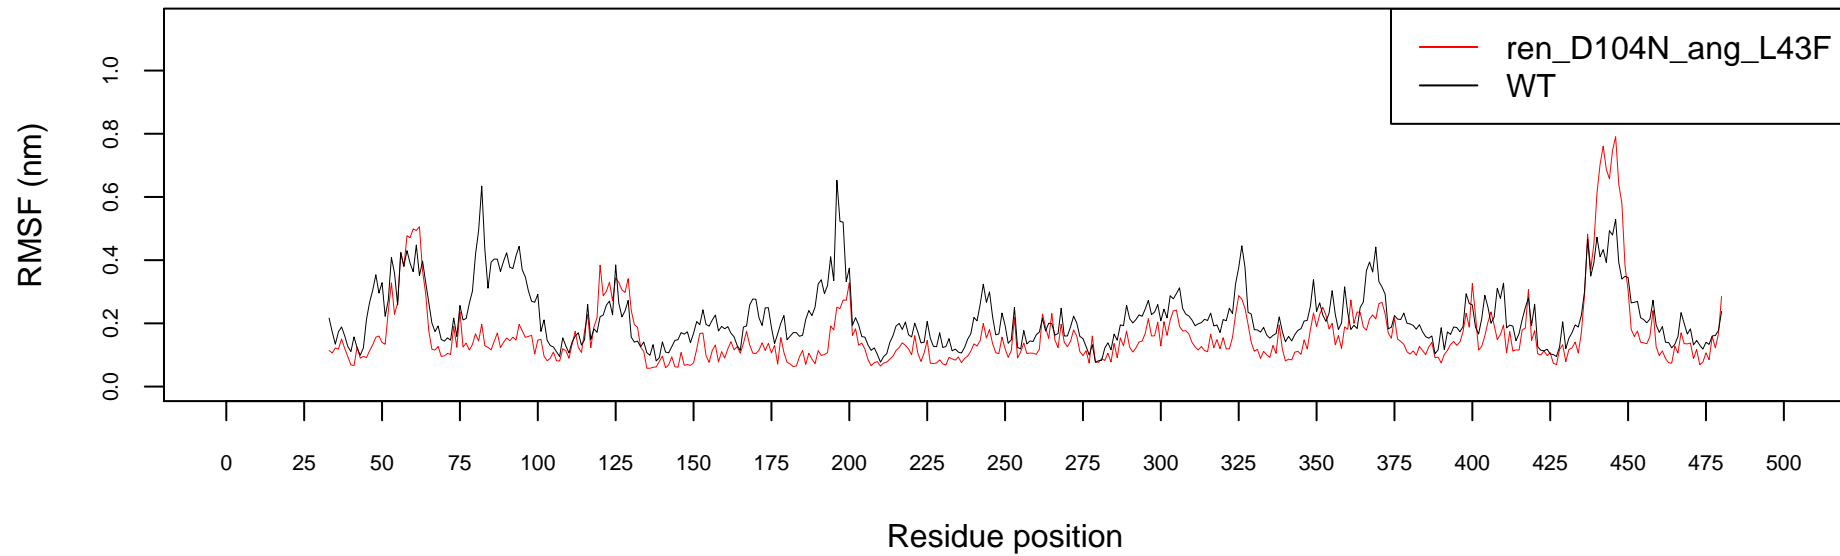

**RMS fluctuations: ren\_D104N (chain A) vs WT**

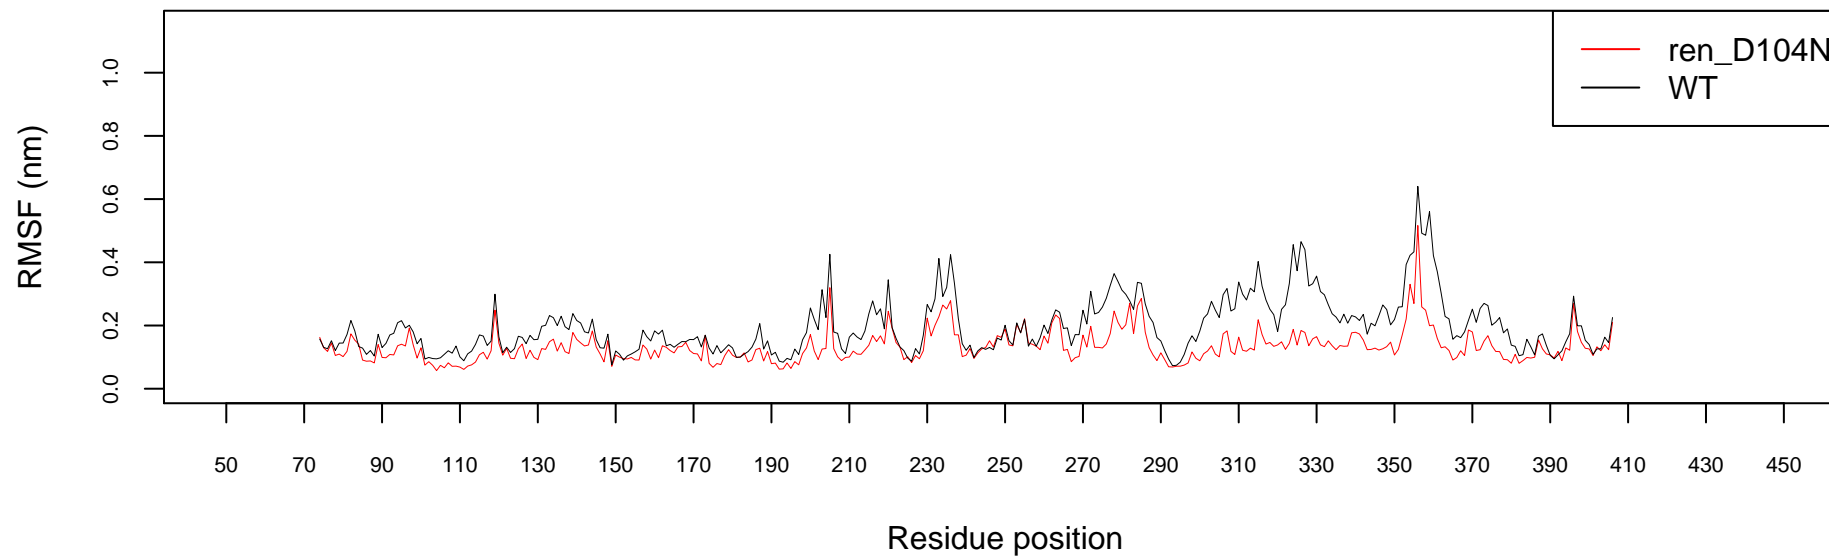

**RMS fluctuations: ren\_D104N (chain B) vs WT**

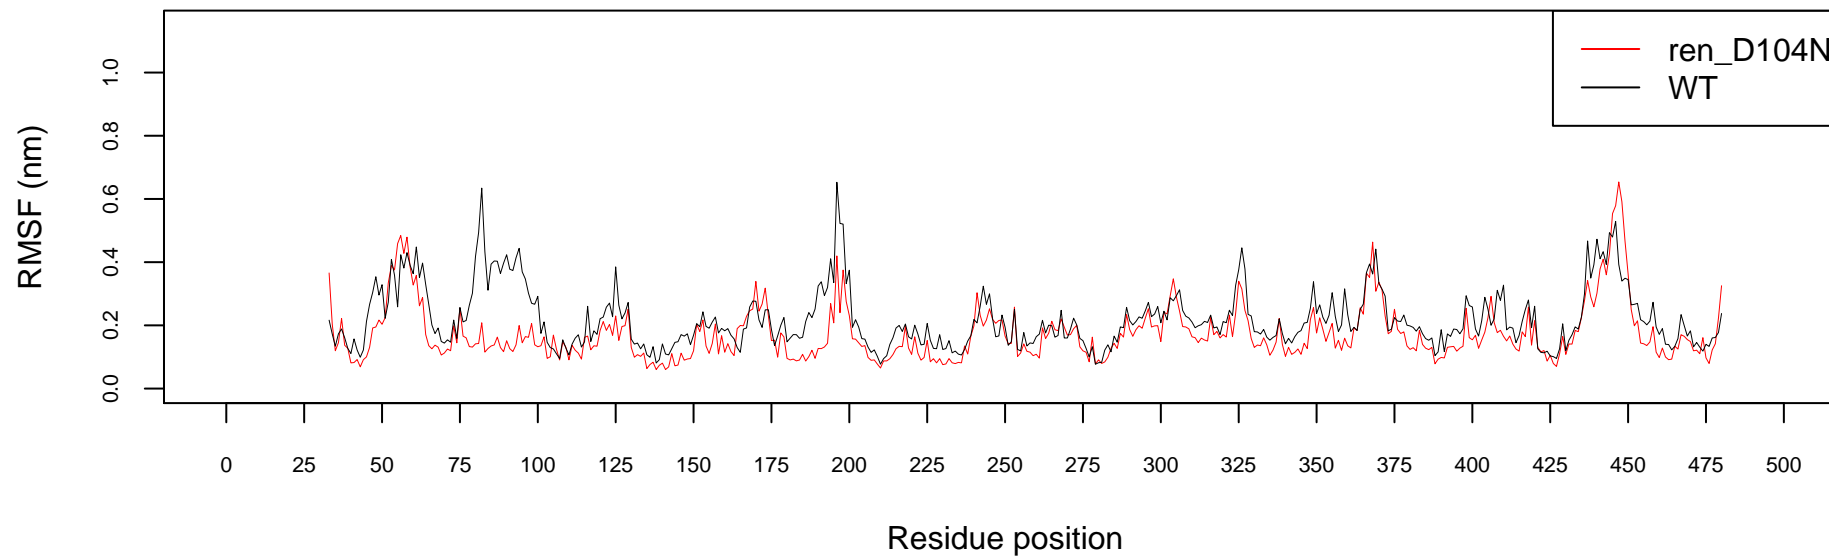

**RMS fluctuations: ren\_F319V\_ang\_A104T (chain A) vs WT**

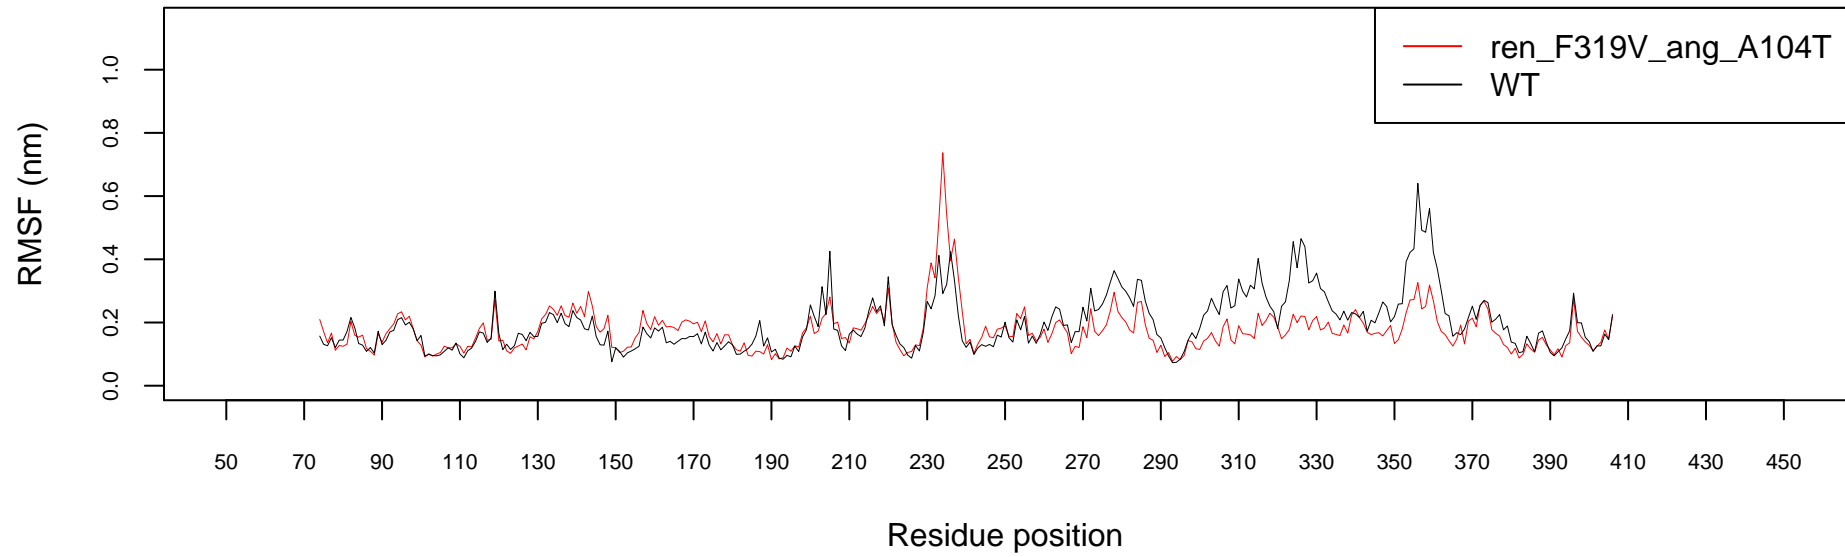

**RMS fluctuations: ren\_F319V\_ang\_A104T (chain B) vs WT**

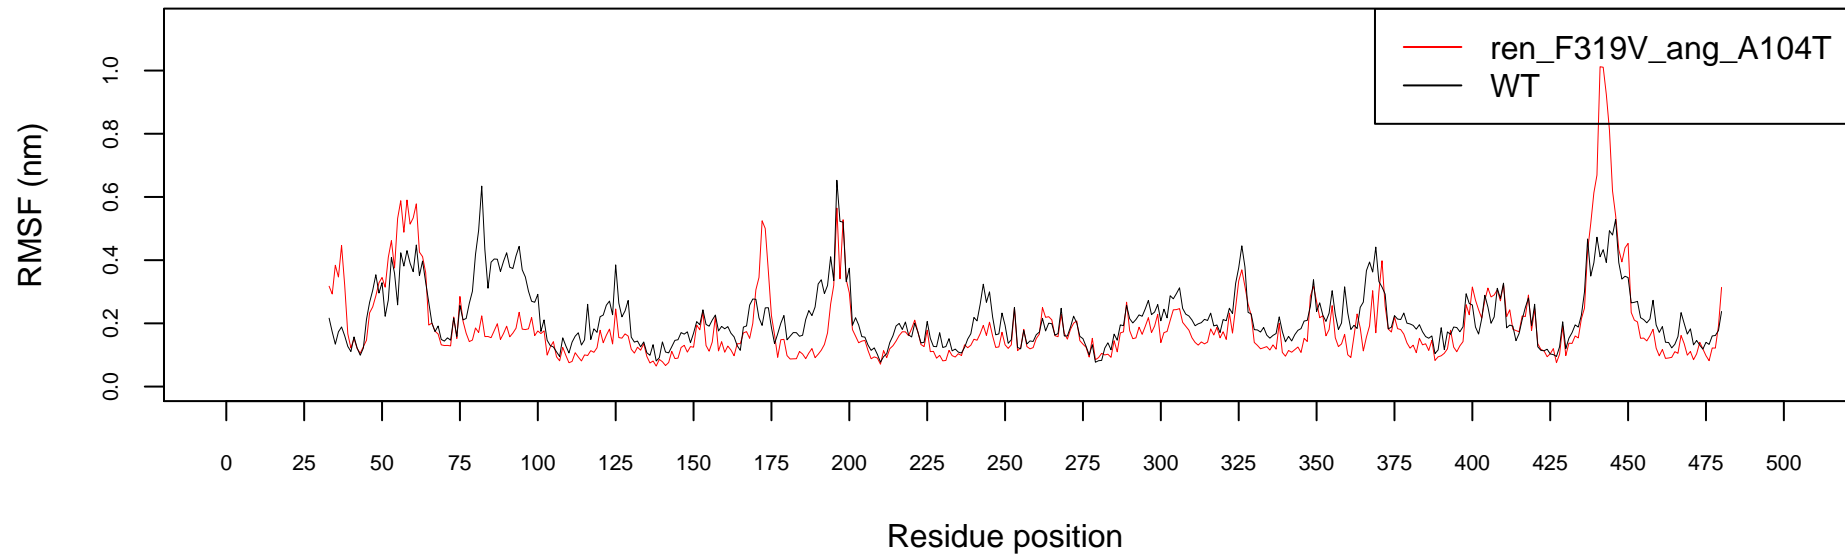

**RMS fluctuations: ren\_F319V\_ang\_M105V (chain A) vs WT**

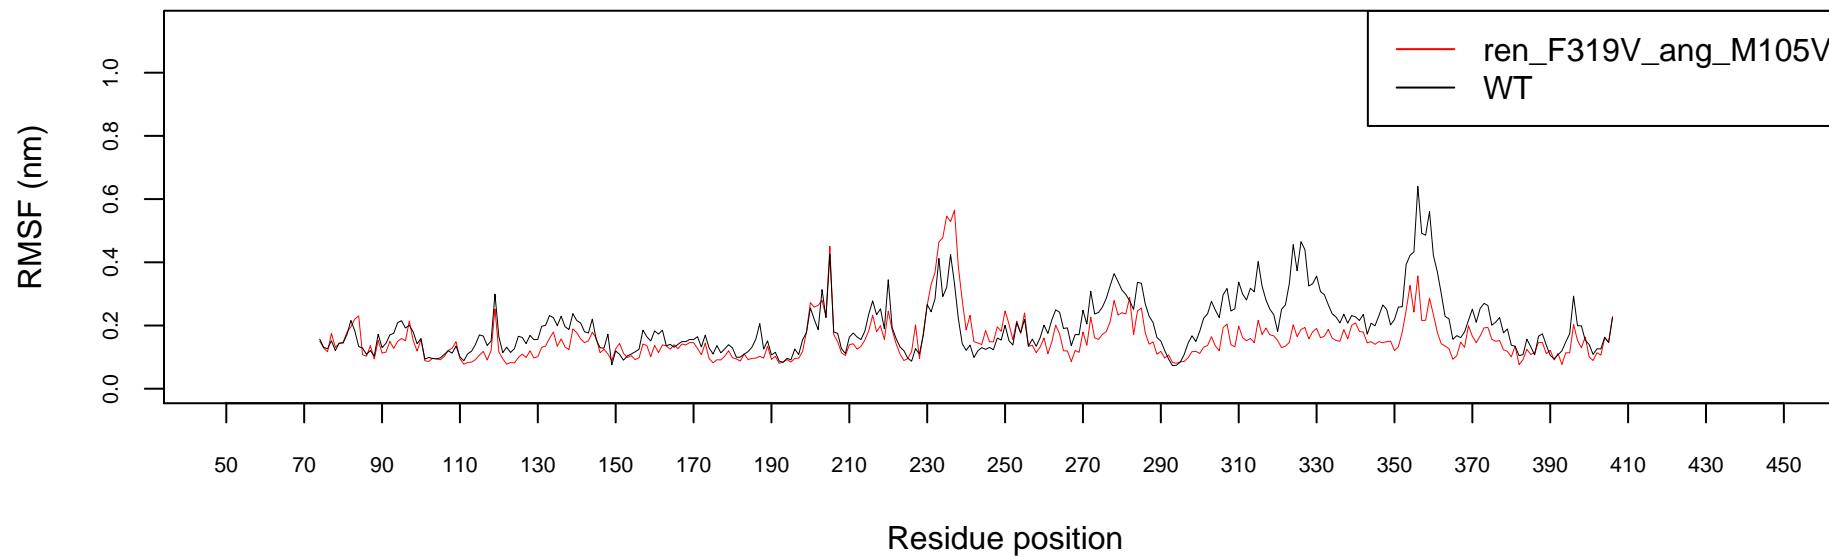

**RMS fluctuations: ren\_F319V\_ang\_M105V (chain B) vs WT**

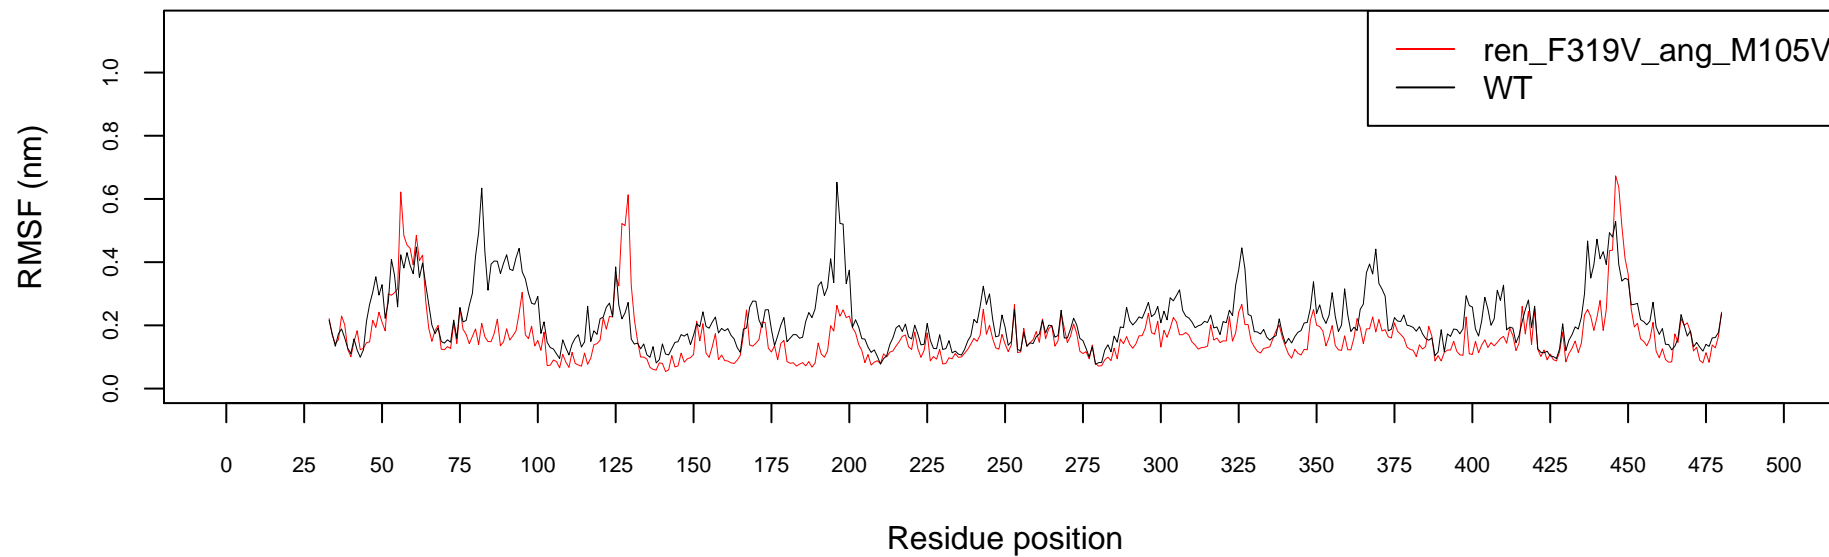

**RMS fluctuations: ren\_F319V (chain A) vs WT**

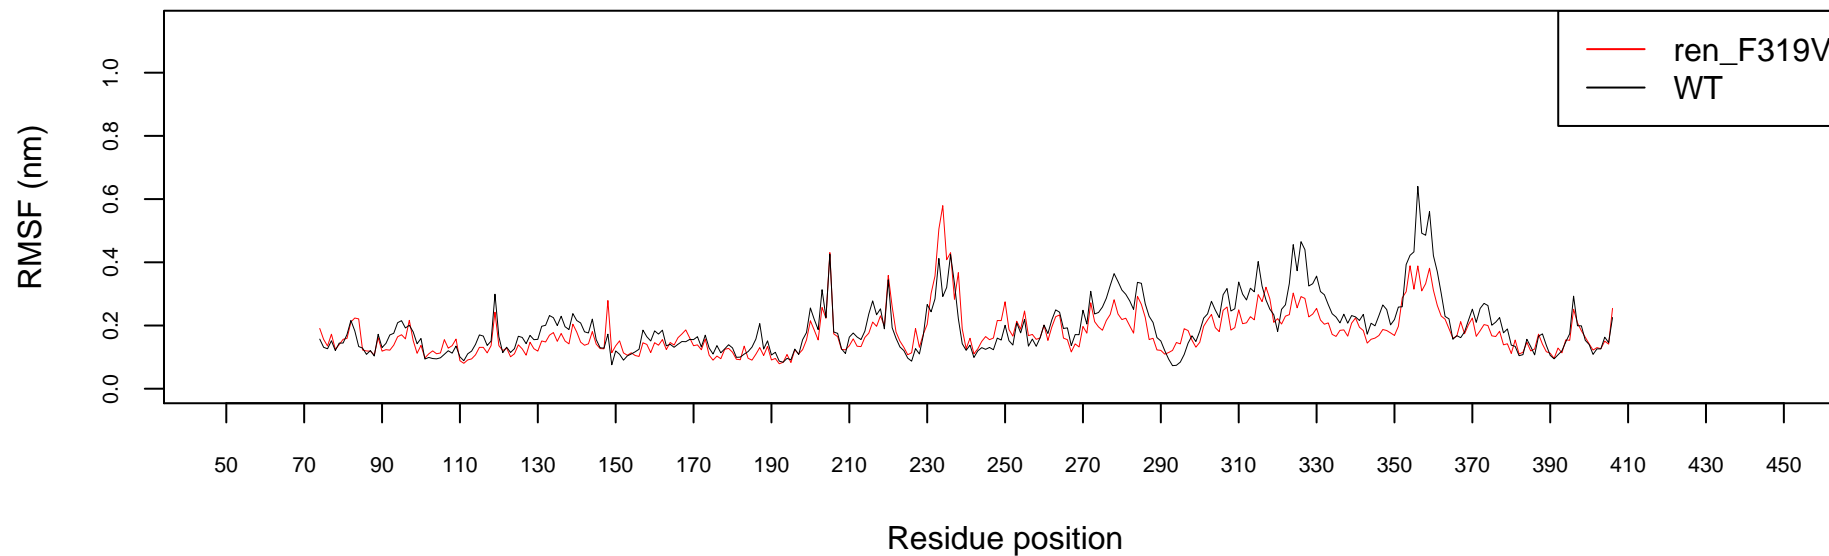

**RMS fluctuations: ren\_F319V (chain B) vs WT**

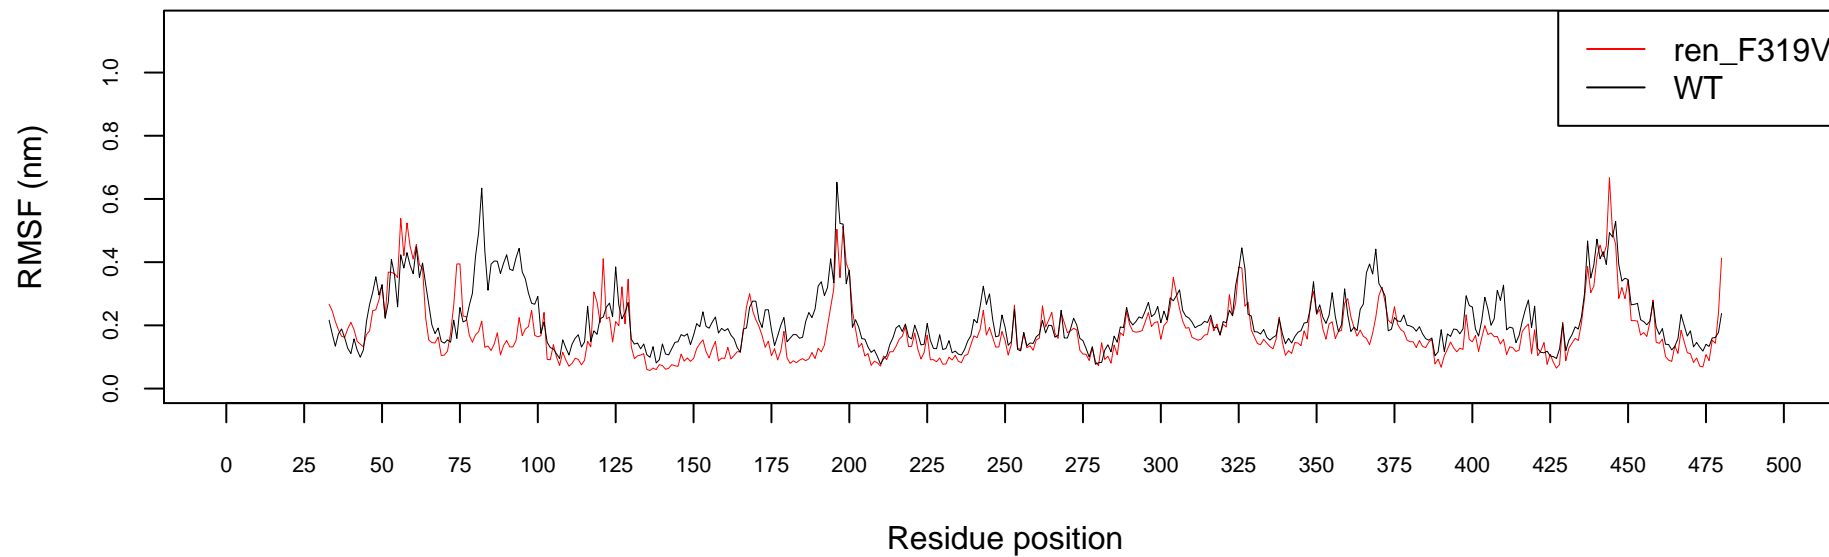

**RMS fluctuations: ren\_L318R\_ang\_A104T (chain A) vs WT**

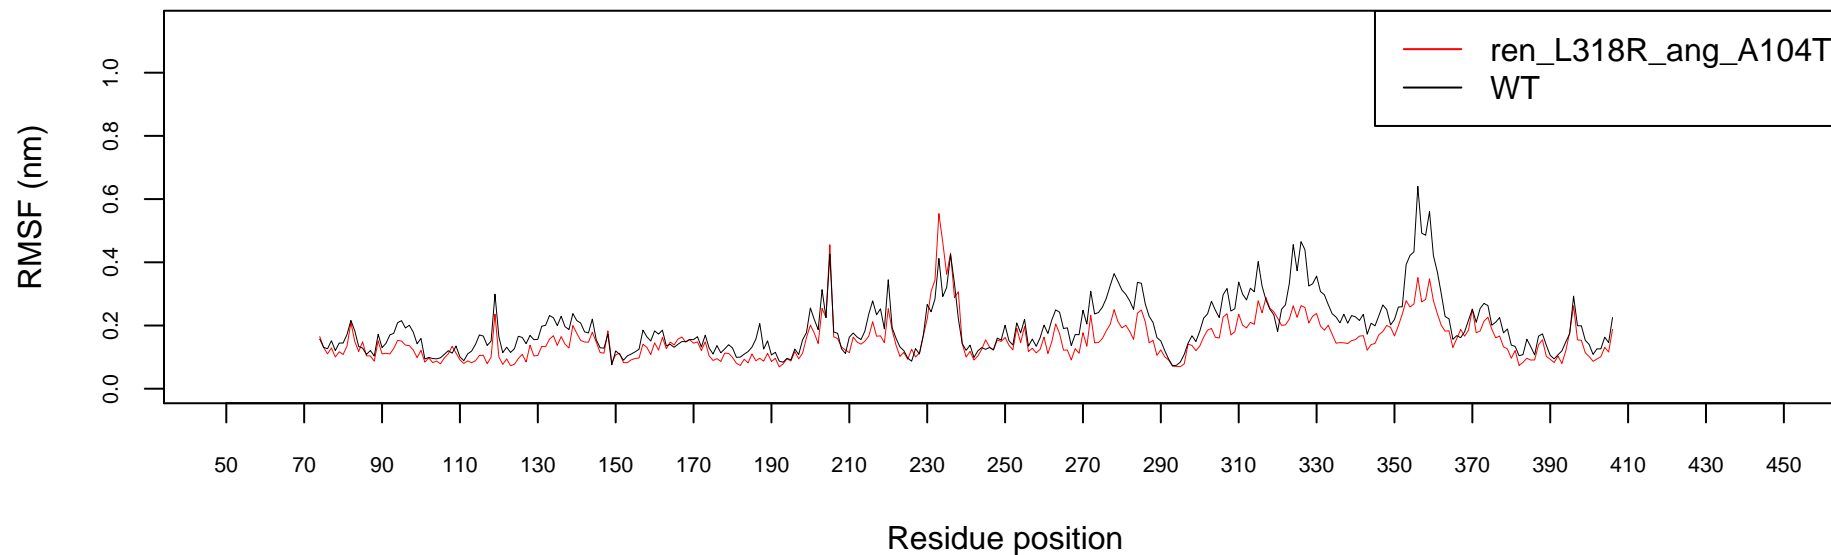

**RMS fluctuations: ren\_L318R\_ang\_A104T (chain B) vs WT**

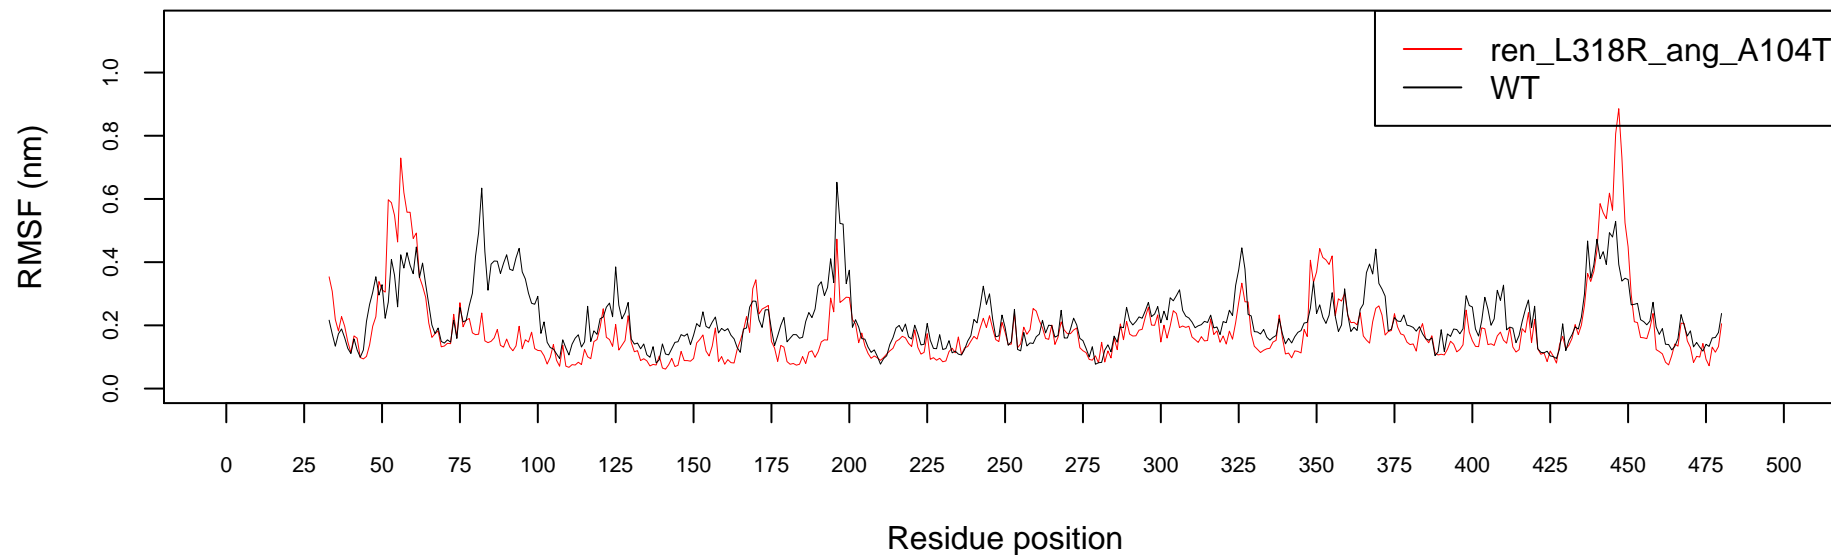



**RMS fluctuations: ren\_R148C\_ang\_E48K (chain A) vs WT**

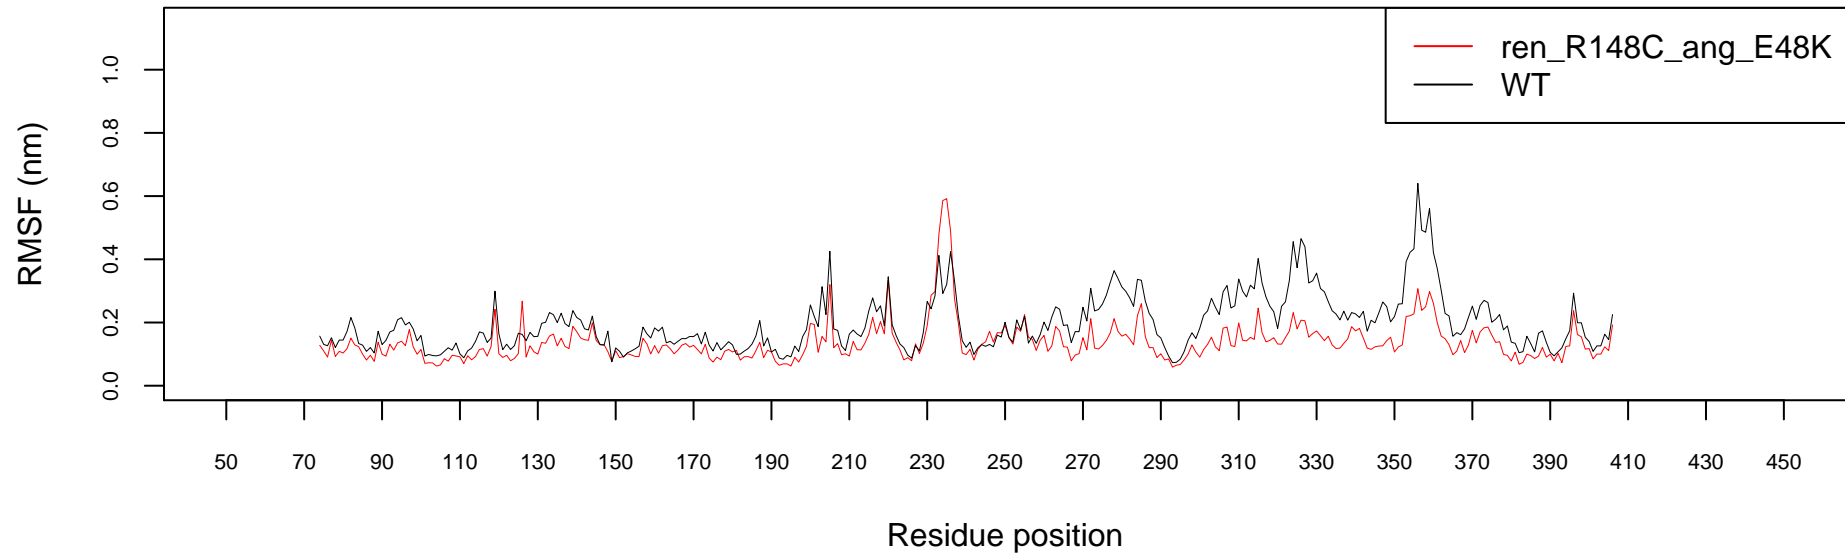

**RMS fluctuations: ren\_R148C\_ang\_E48K (chain B) vs WT**

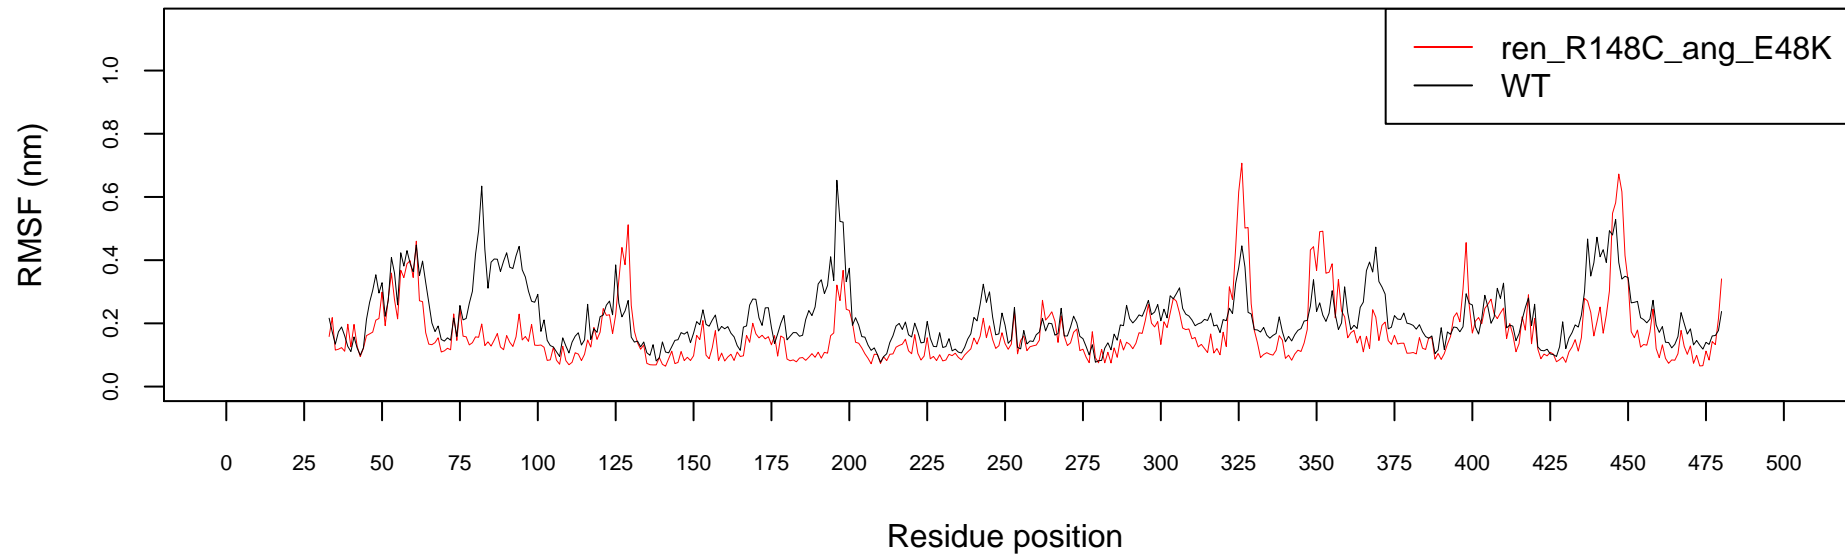

**RMS fluctuations: ren\_R148C\_ang\_S49G (chain A) vs WT**

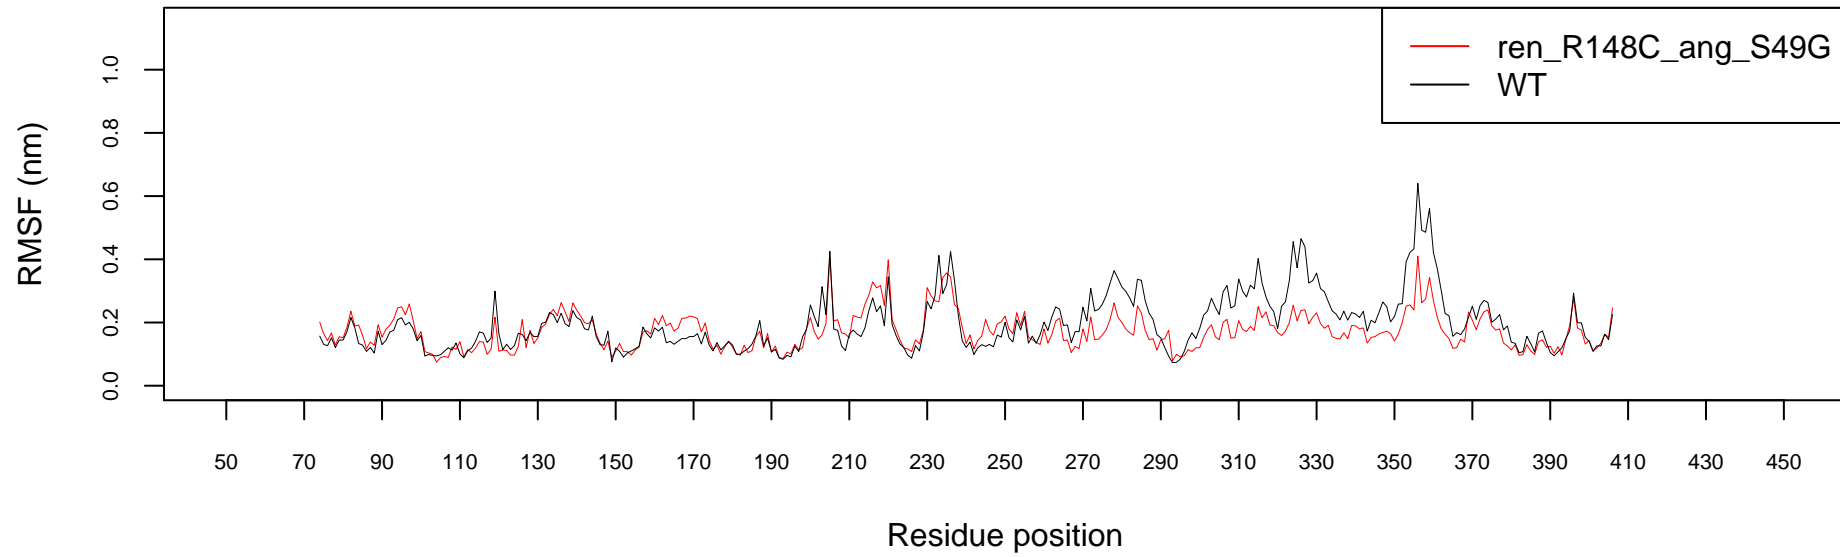

**RMS fluctuations: ren\_R148C\_ang\_S49G (chain B) vs WT**

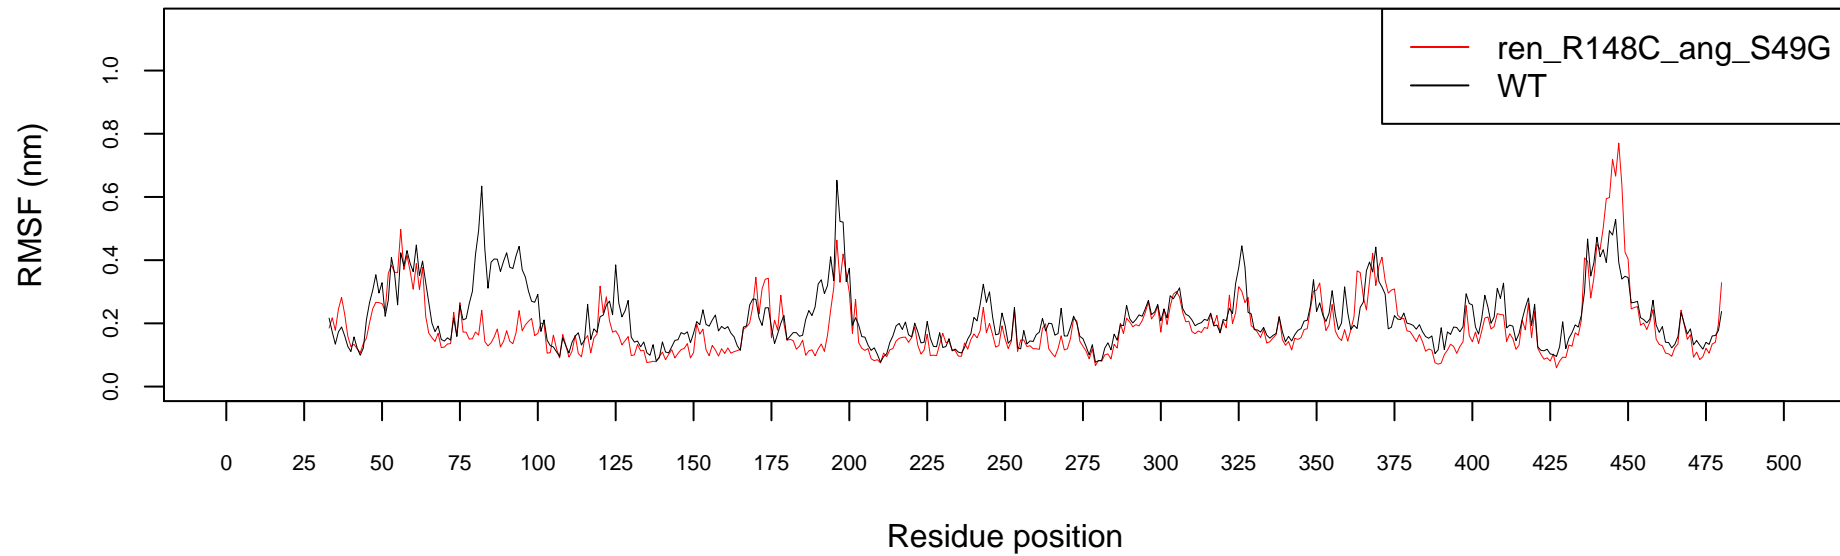

**RMS fluctuations: ren\_R148C\_ang\_S49N (chain A) vs WT**

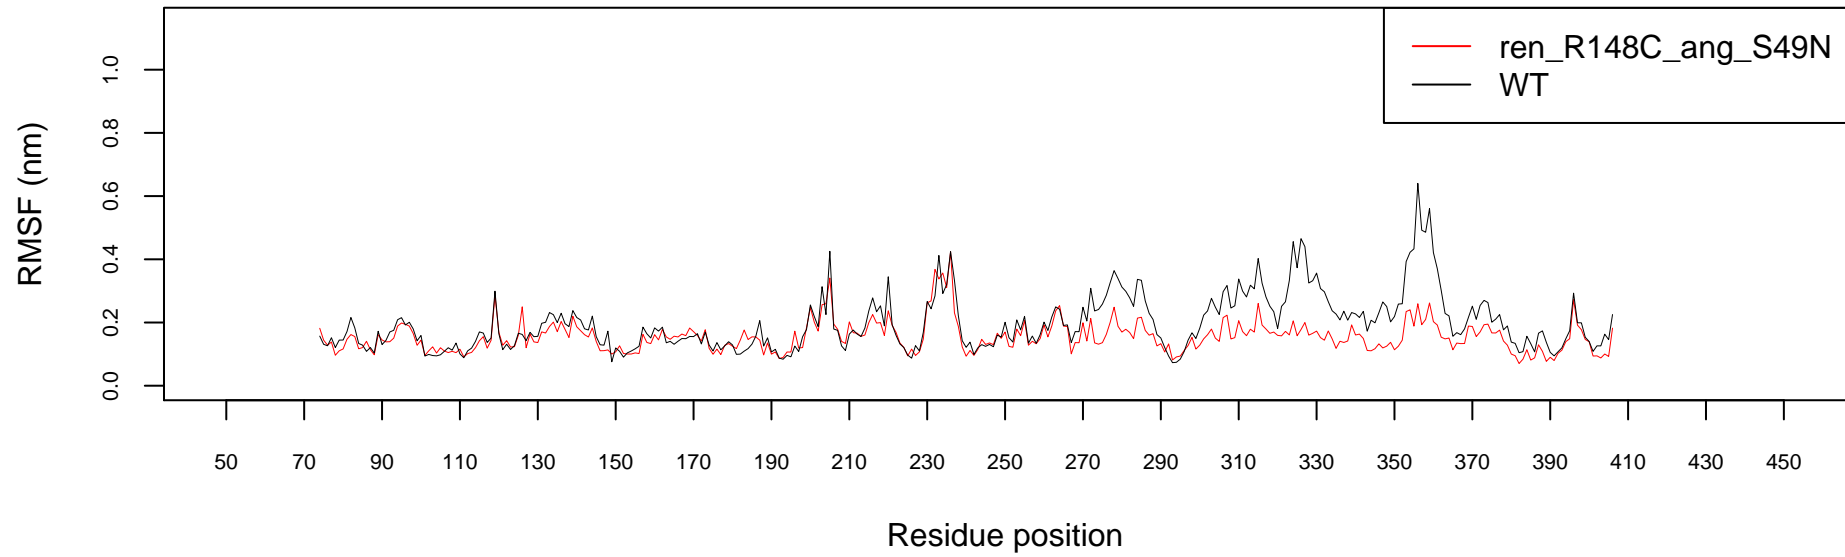

**RMS fluctuations: ren\_R148C\_ang\_S49N (chain B) vs WT**

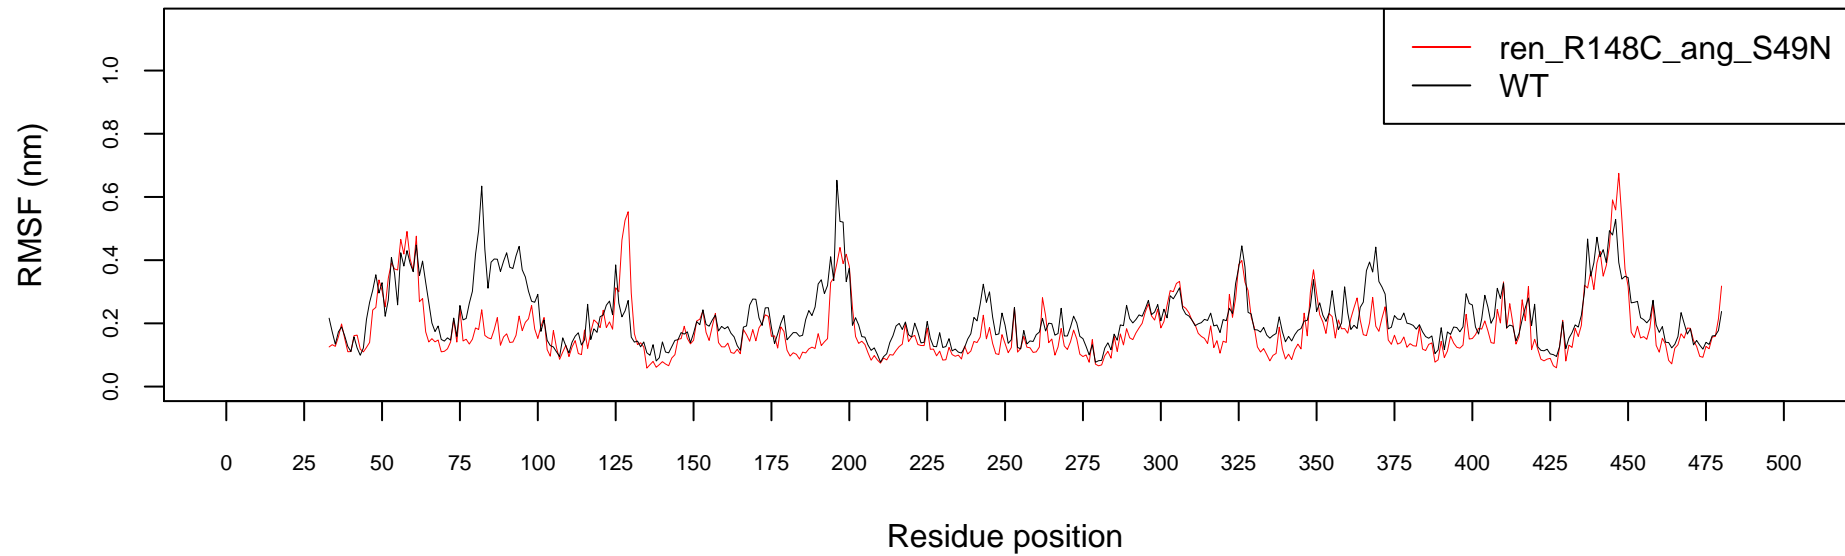

**RMS fluctuations: ren\_R148C (chain A) vs WT**

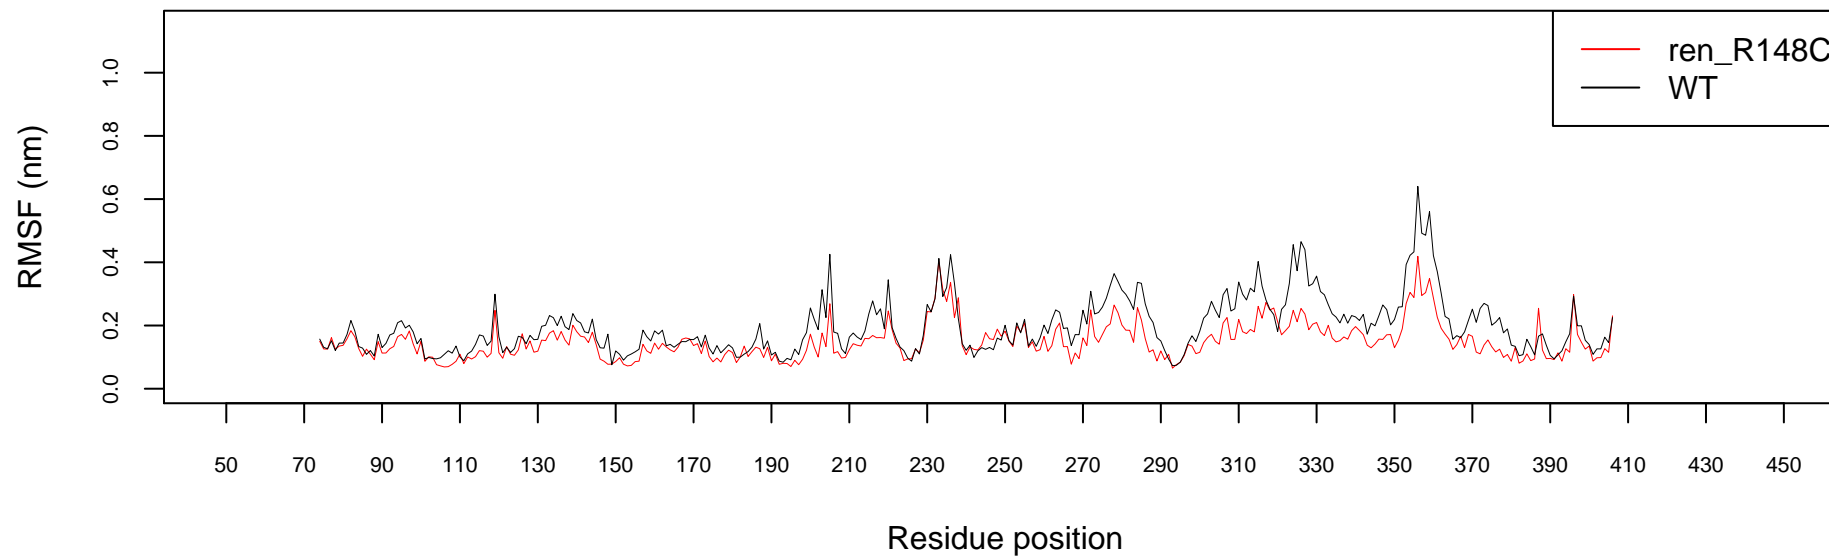

**RMS fluctuations: ren\_R148C (chain B) vs WT**

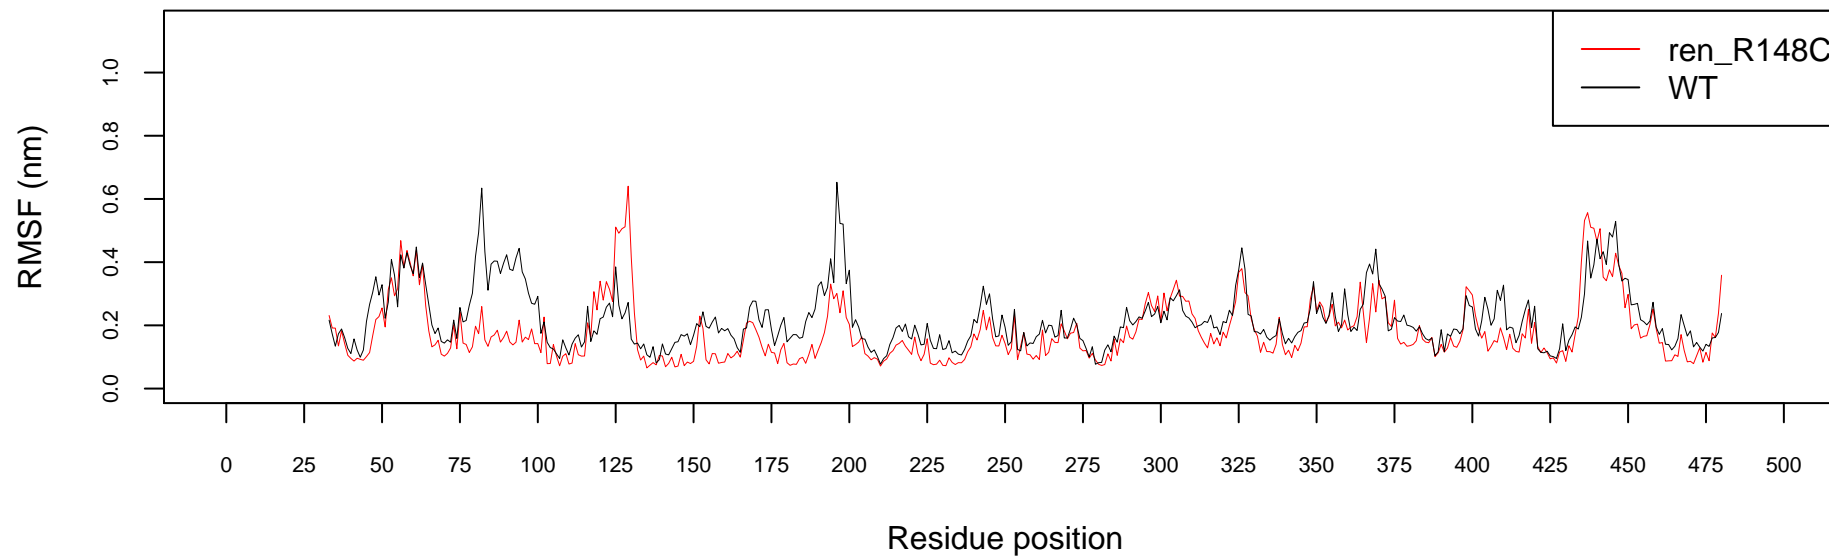

**RMS fluctuations: ren\_R148H\_ang\_E48K (chain A) vs WT**

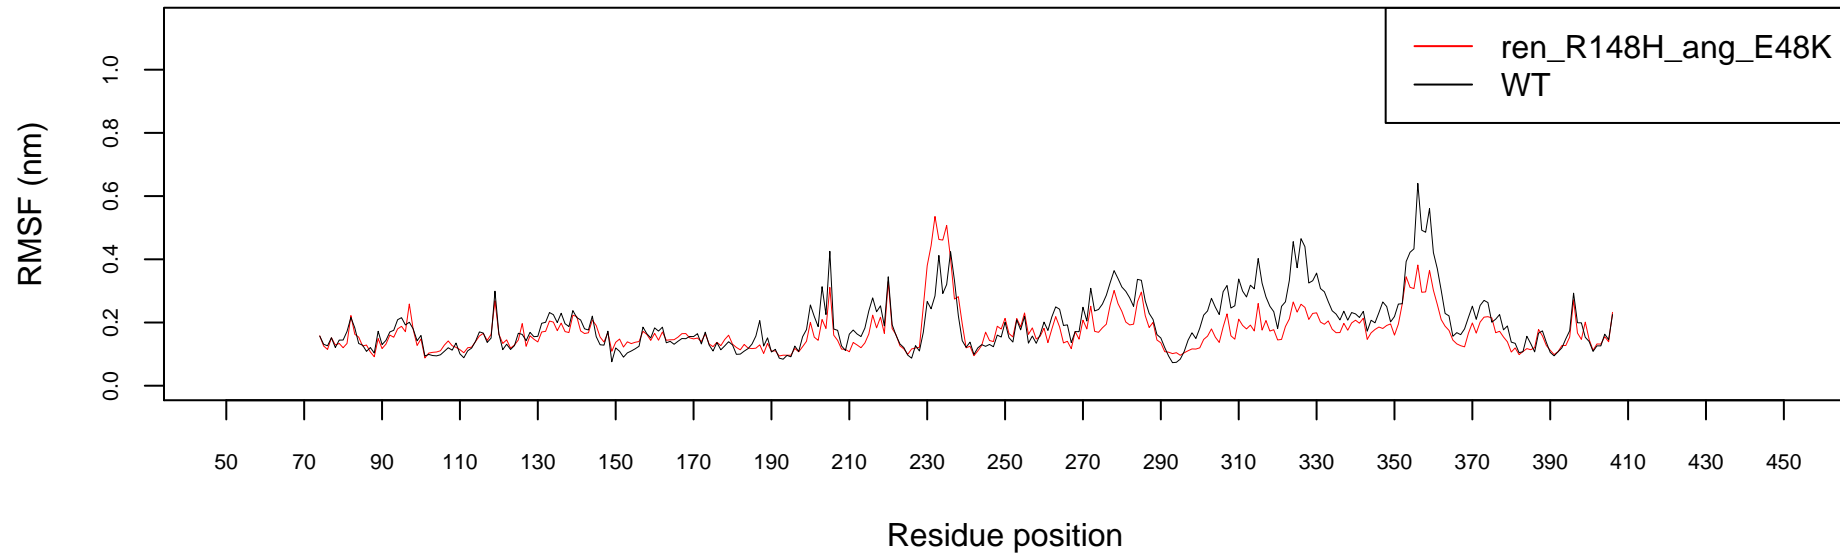

**RMS fluctuations: ren\_R148H\_ang\_E48K (chain B) vs WT**

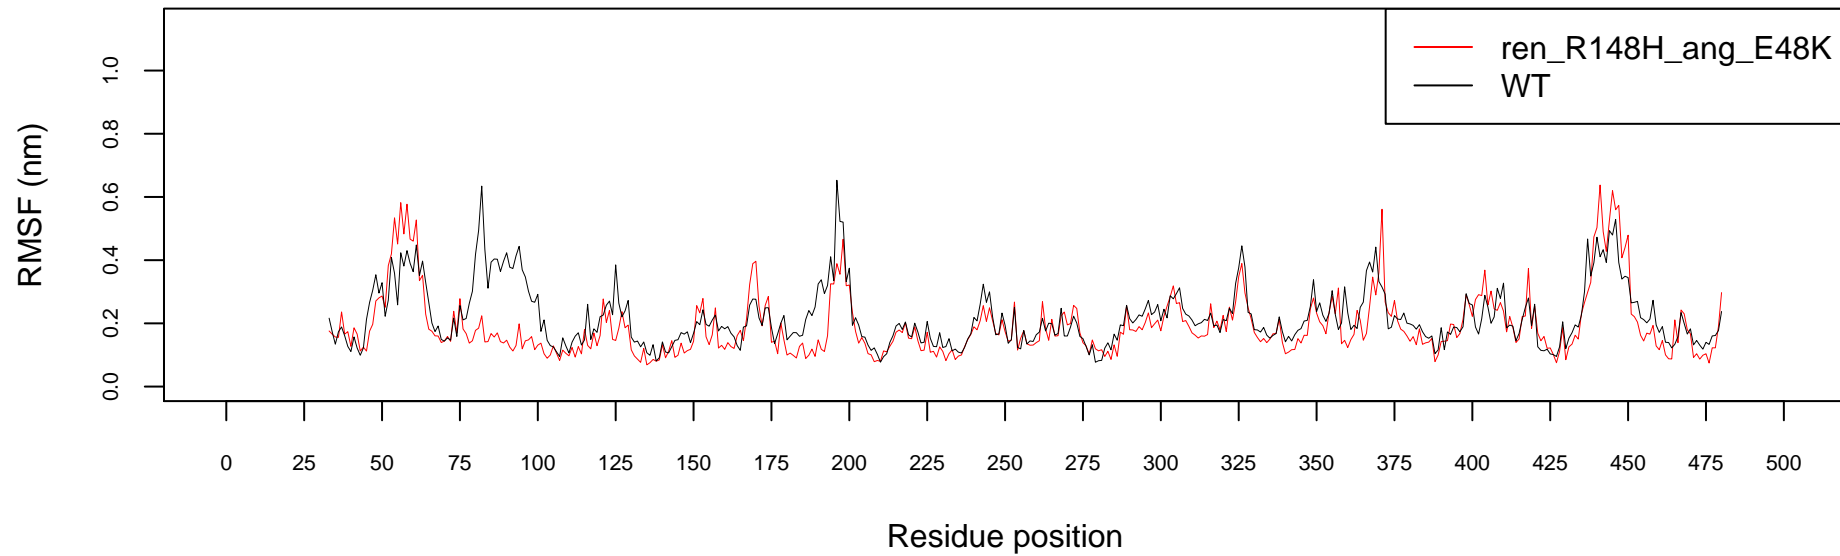

**RMS fluctuations: ren\_R148H\_ang\_S49G (chain A) vs WT**

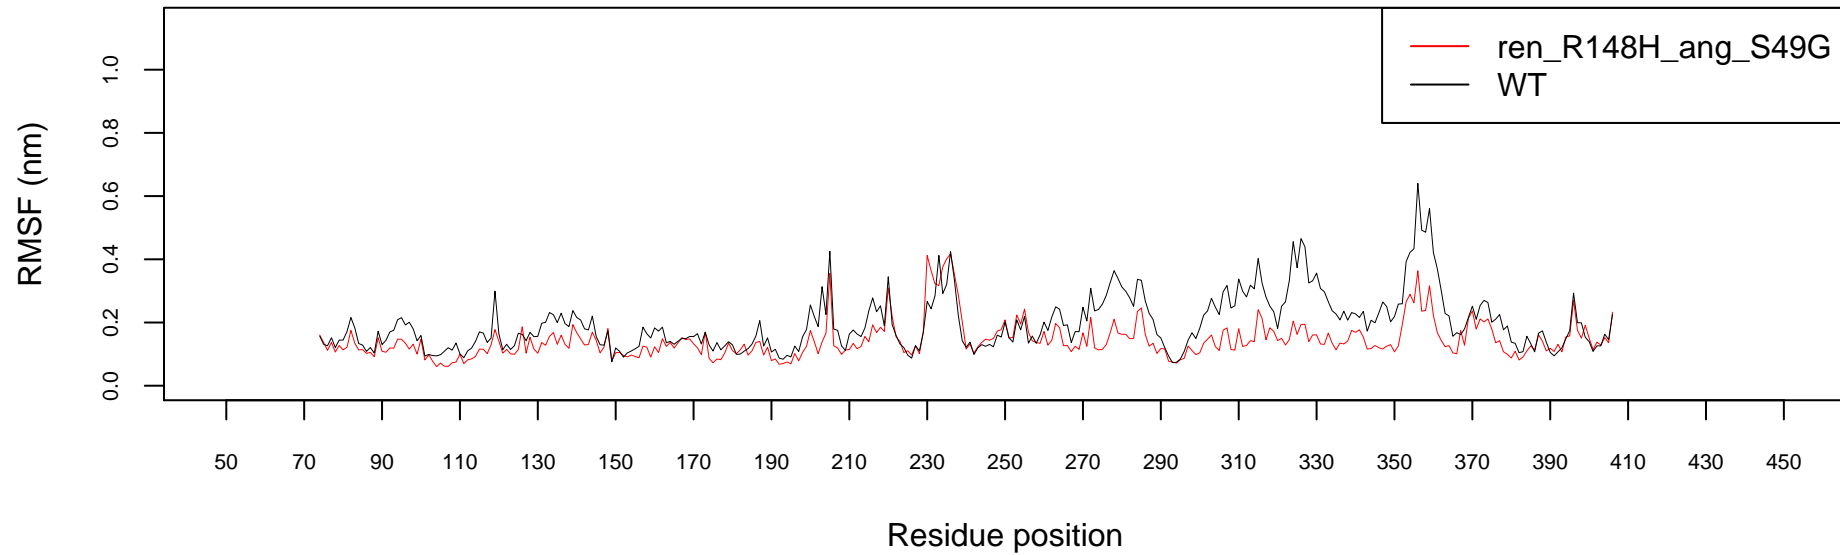

**RMS fluctuations: ren\_R148H\_ang\_S49G (chain B) vs WT**

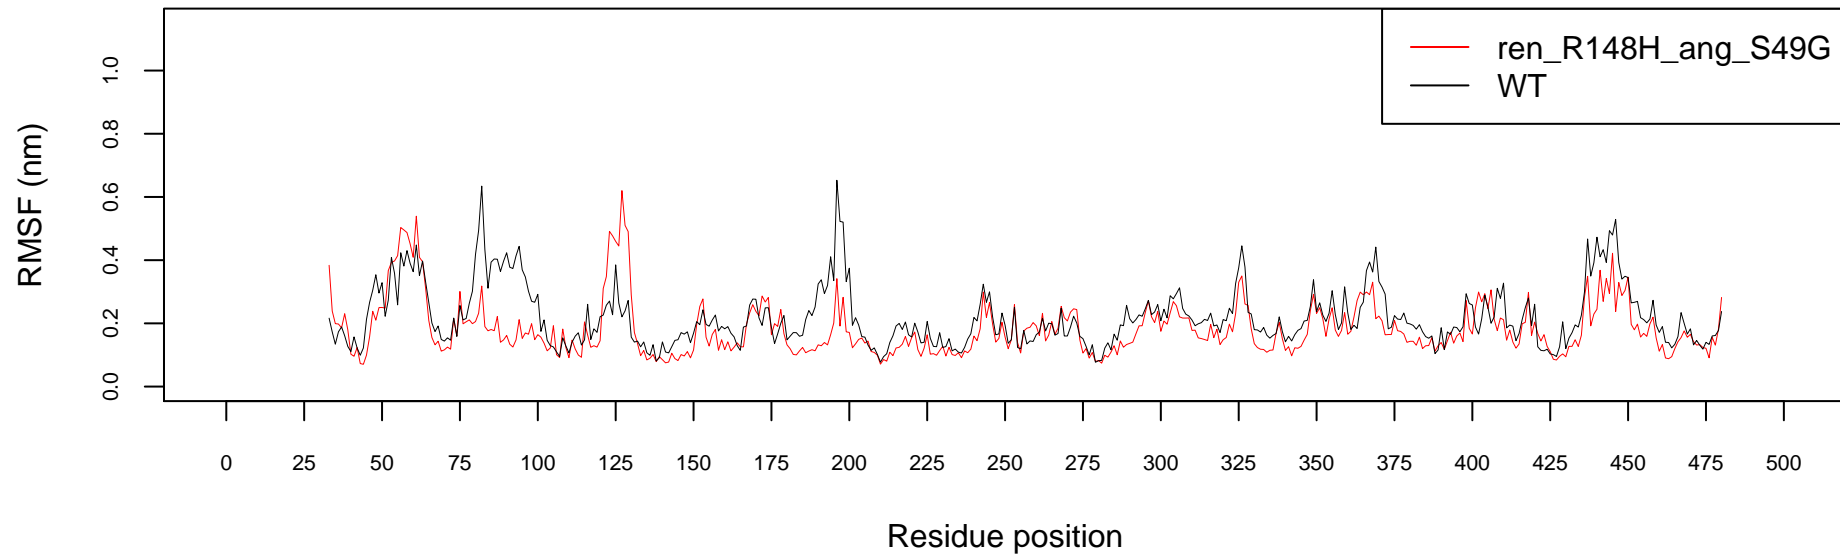

**RMS fluctuations: ren\_R148H\_ang\_S49N (chain A) vs WT**

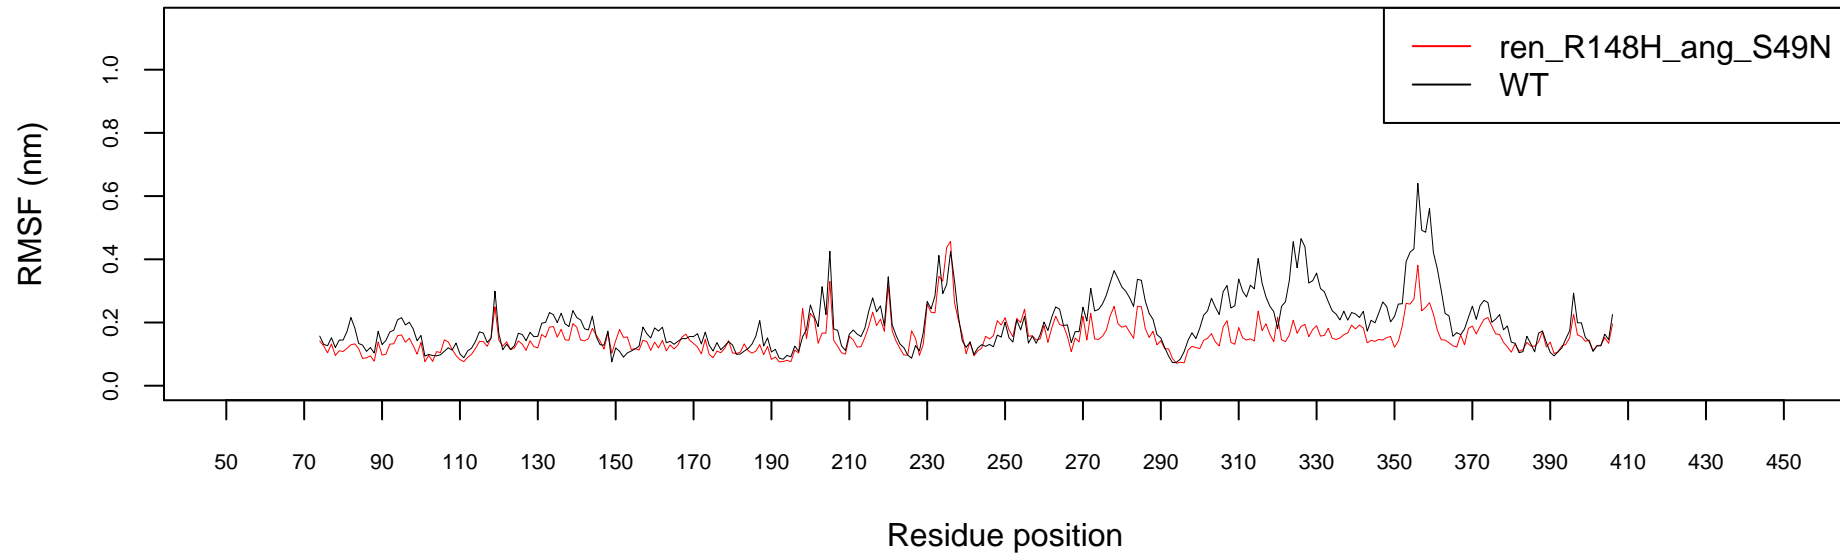

**RMS fluctuations: ren\_R148H\_ang\_S49N (chain B) vs WT**

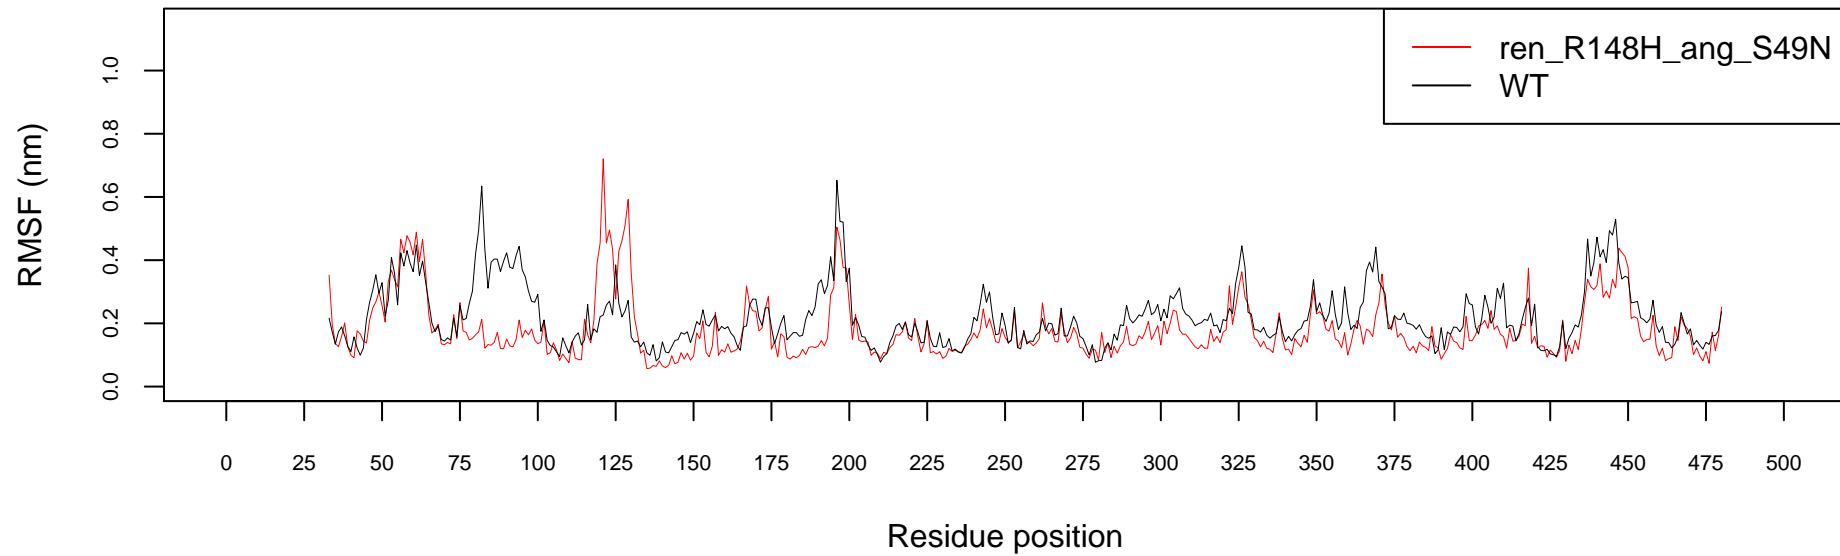

**RMS fluctuations: ren\_R148H (chain A) vs WT**

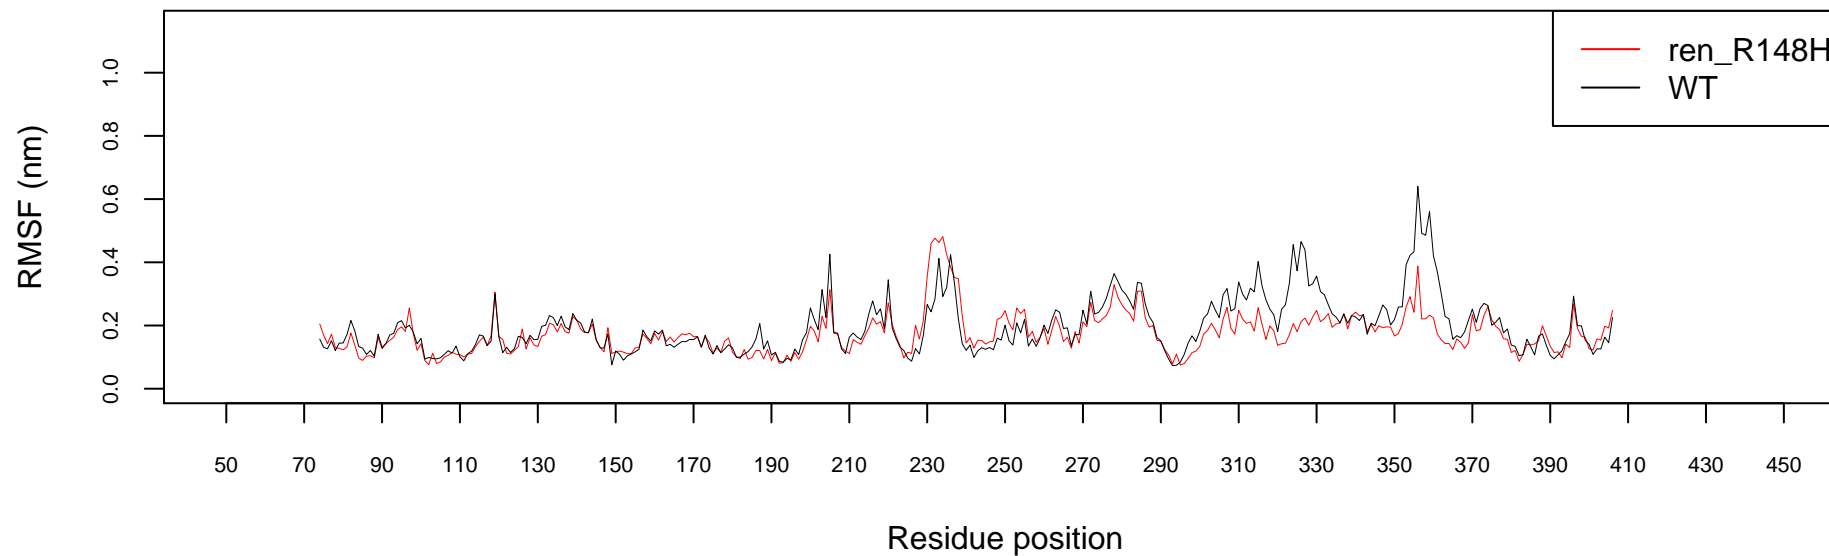

**RMS fluctuations: ren\_R148H (chain B) vs WT**

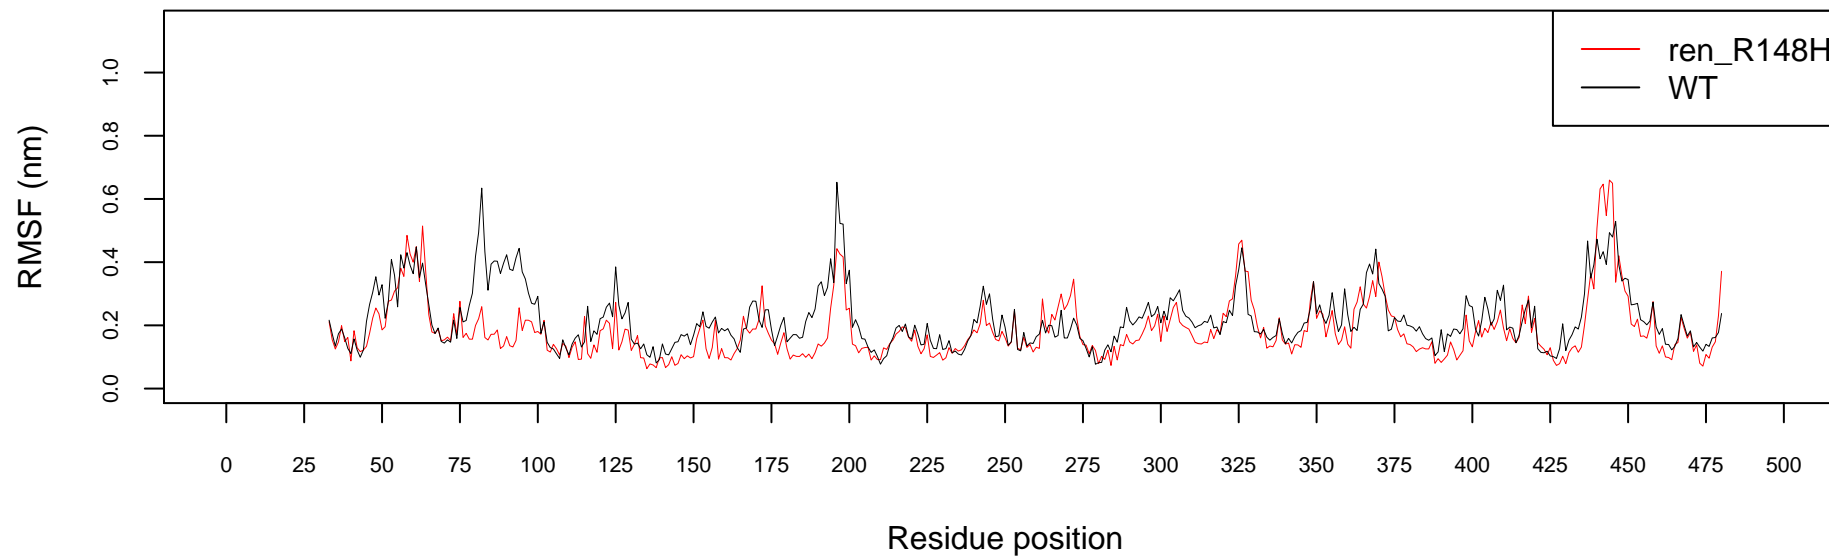

Supplement: NIHMS846845-supplement-4.pdf [file NIHMS846845-supplement-4.pdf]
