# Supplementary material
Source: PubMed Central journal article supplement (PMC5583000)

ang\_A104T (Chain B, position 104)  
6.7A contact network

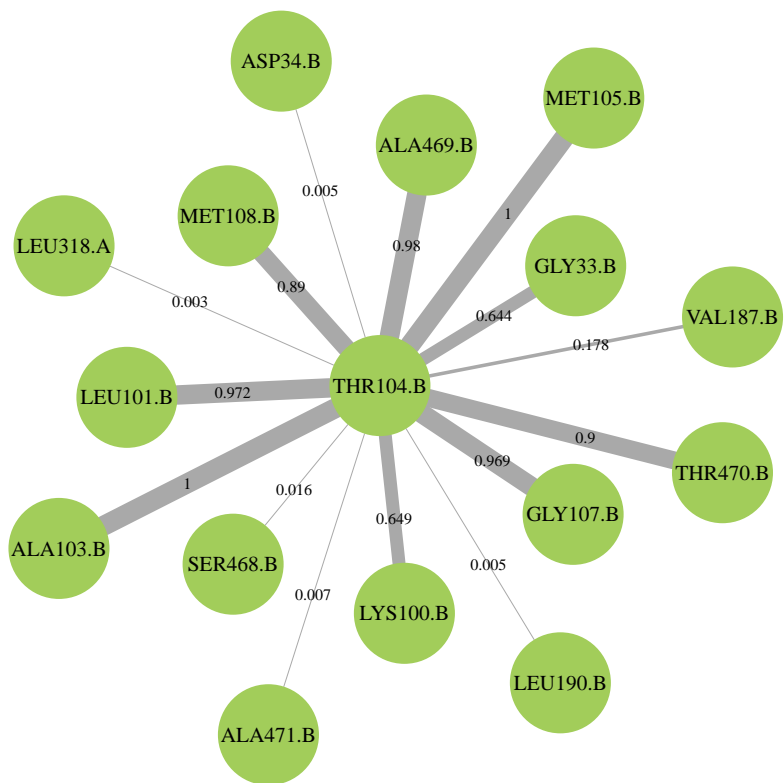

WT  
6.7A contact network

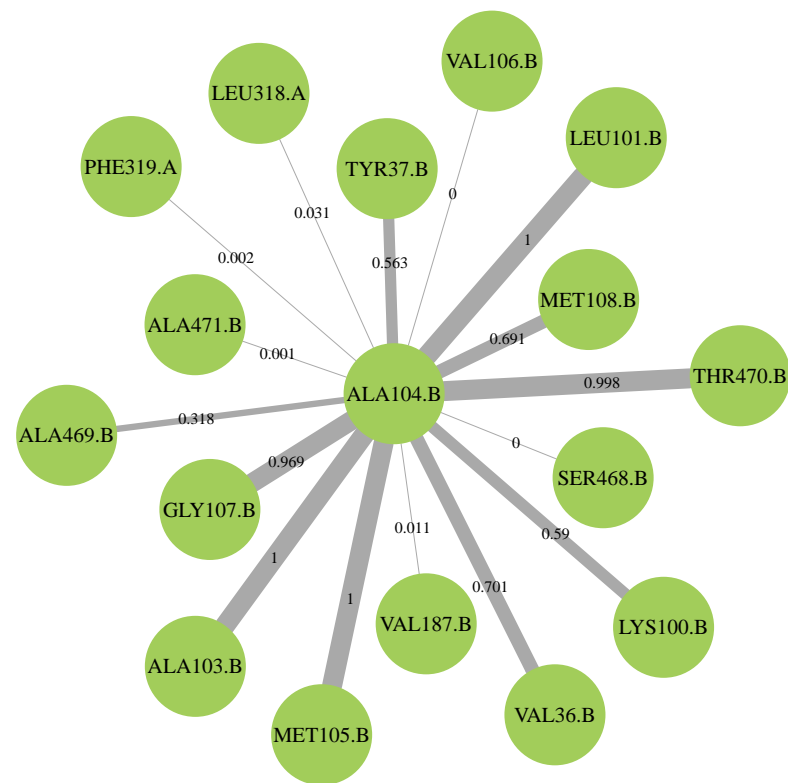

ang\_D168Y (Chain B, position 168)  
6.7A contact network

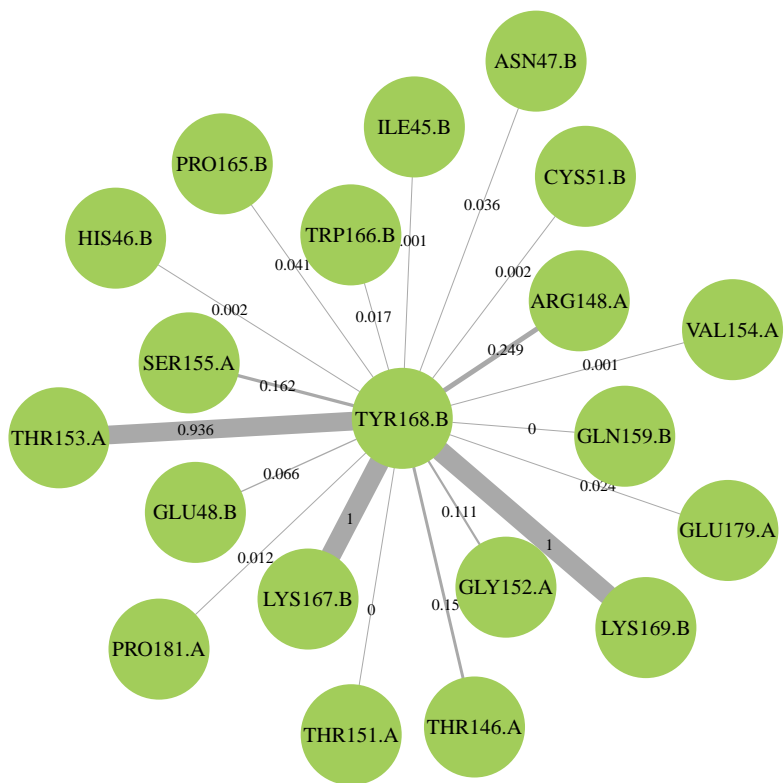

WT  
6.7A contact network

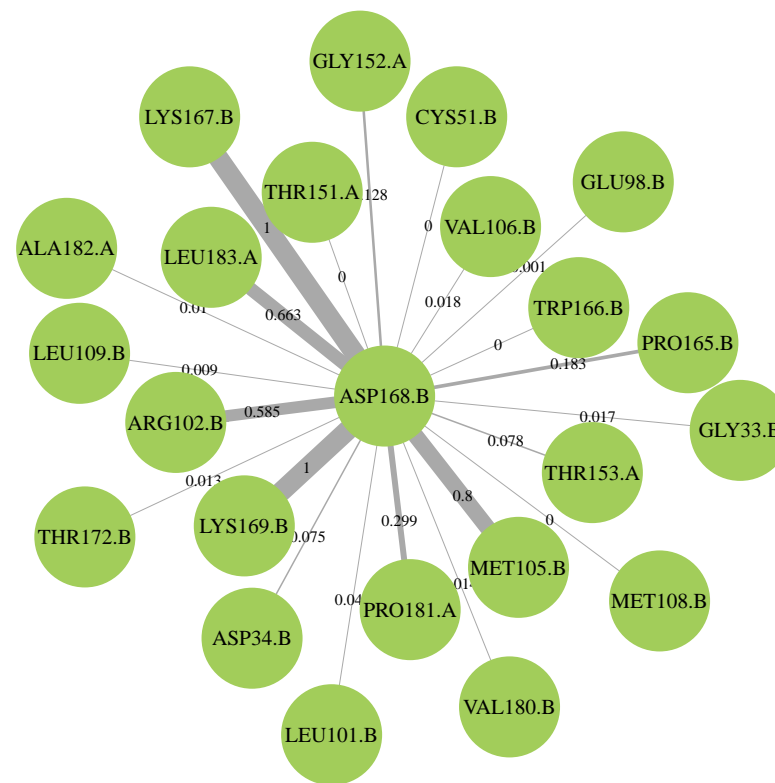

ang\_E48K (Chain B, position 48)  
6.7A contact network

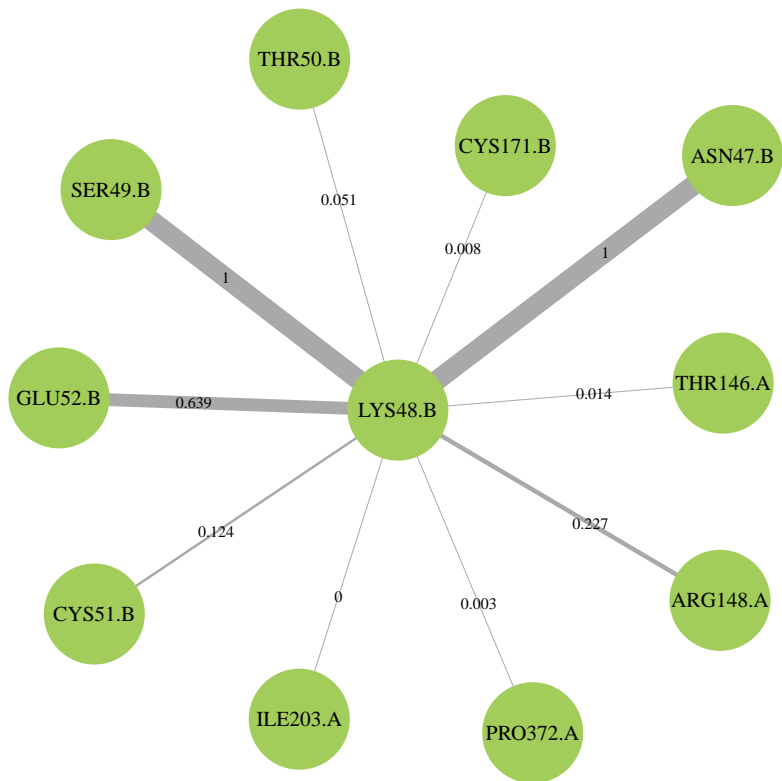

WT  
6.7A contact network

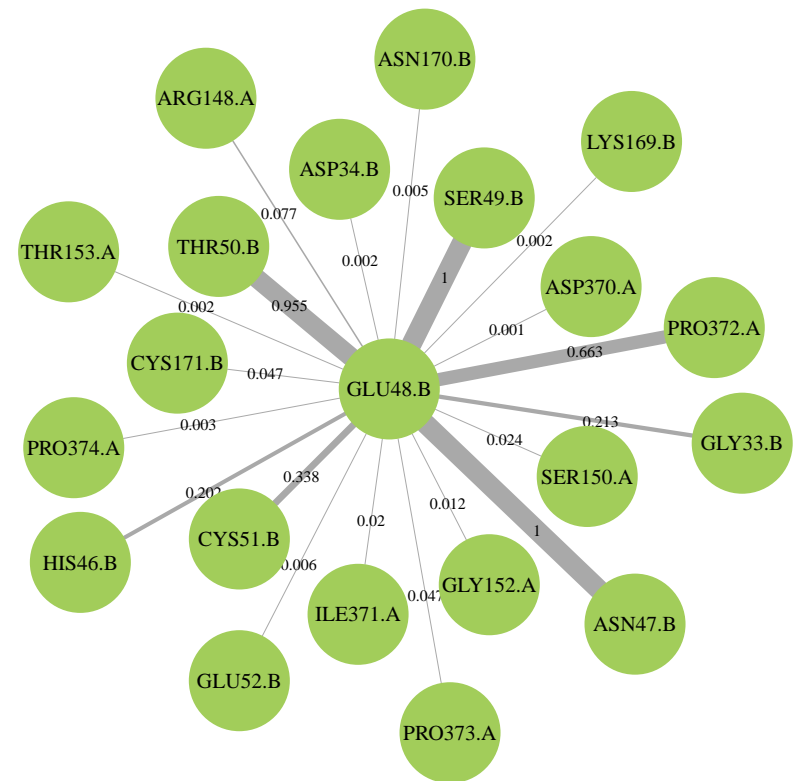

ang\_H39R (Chain B, position 39)  
6.7A contact network

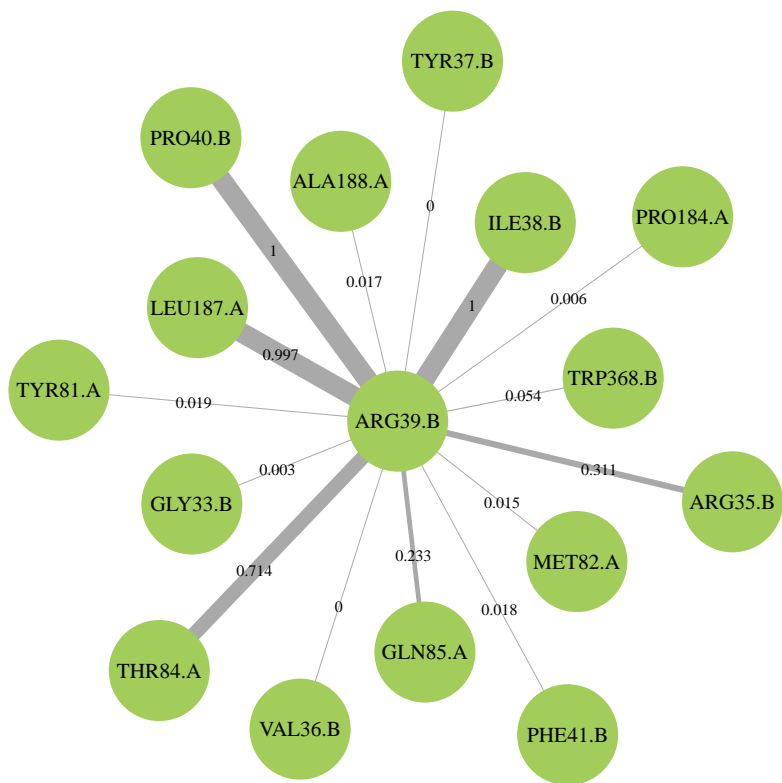

WT  
6.7A contact network

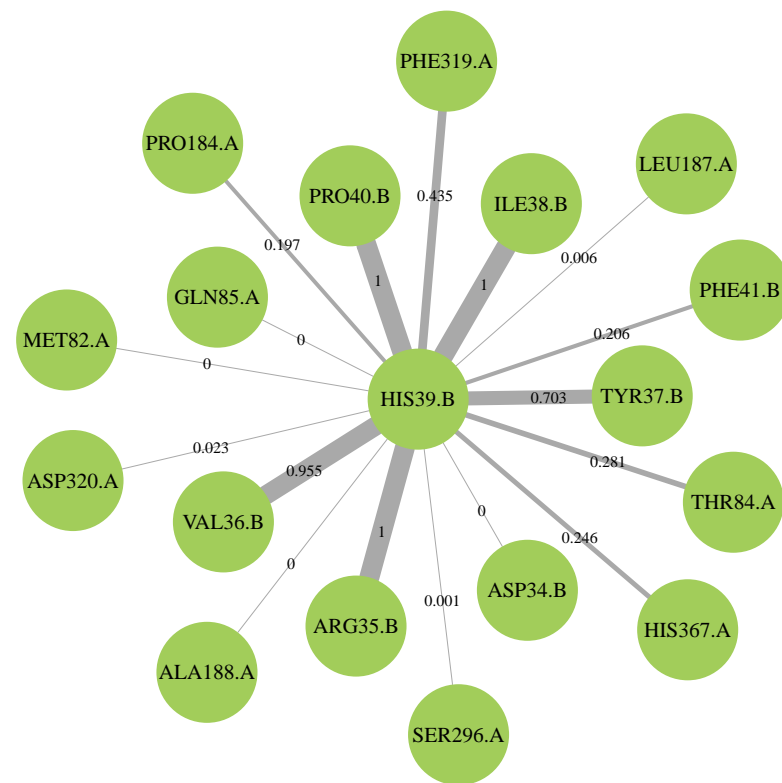

ang\_L43F (Chain B, position 43)  
6.7A contact network

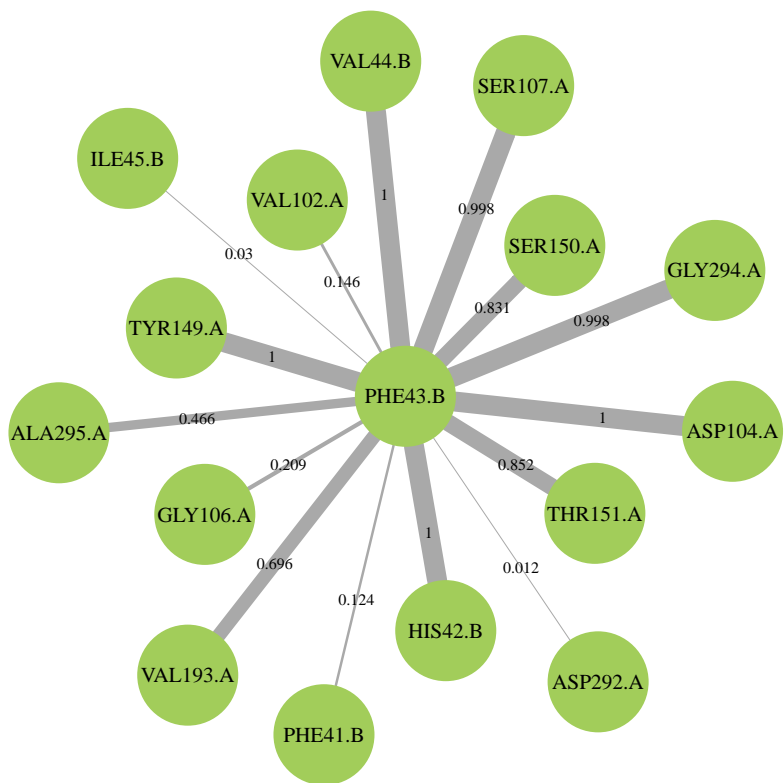

WT  
6.7A contact network

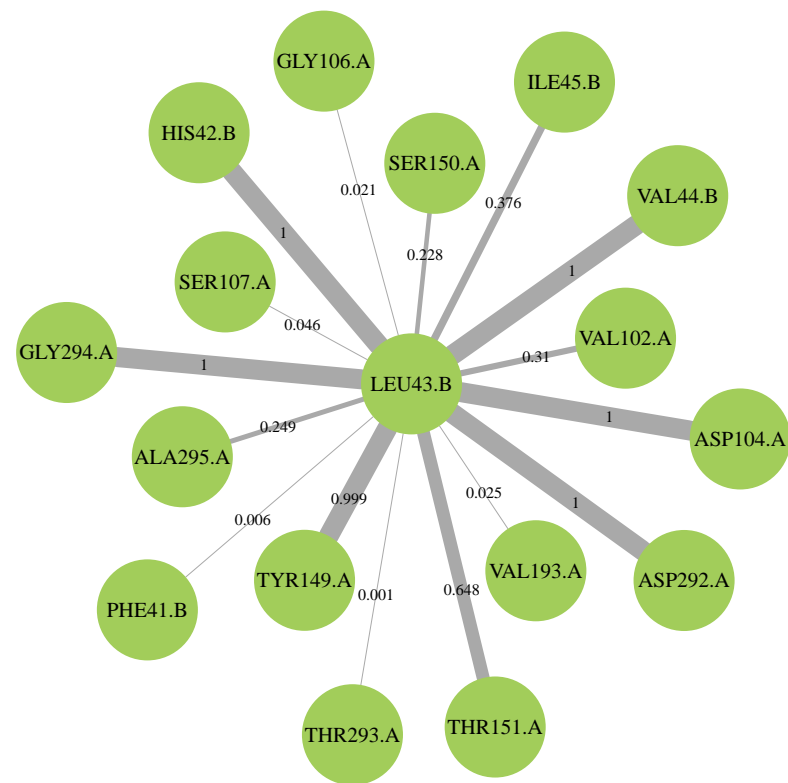

ang\_M105V (Chain B, position 105)  
6.7A contact network

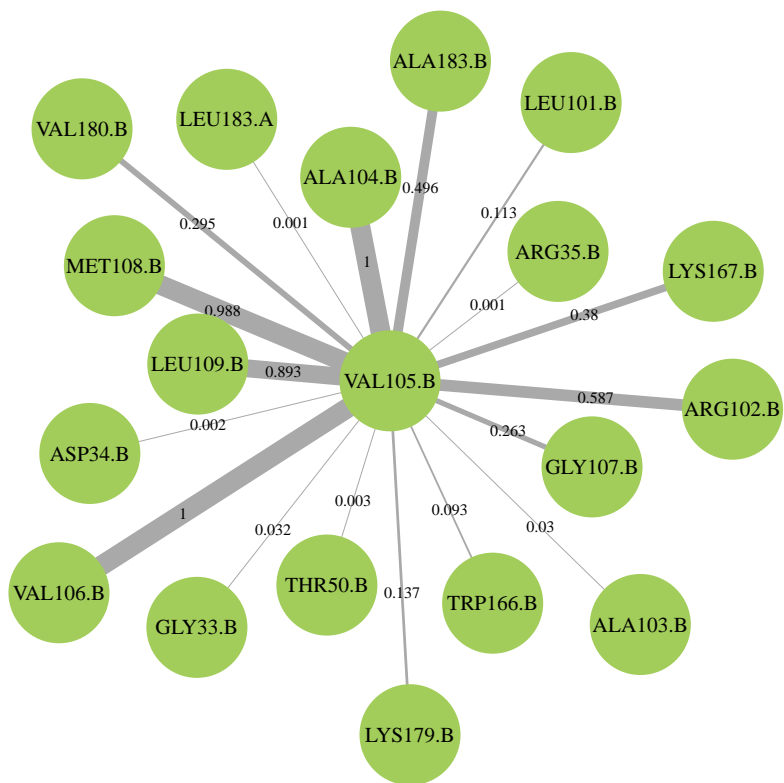

WT  
6.7A contact network

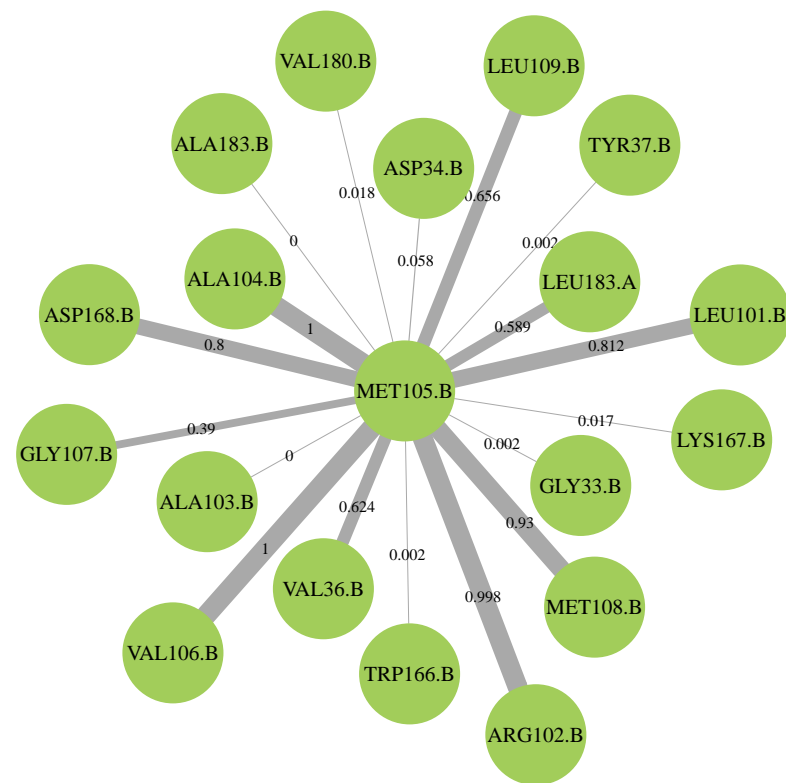

ang\_P40L (Chain B, position 40)  
6.7A contact network

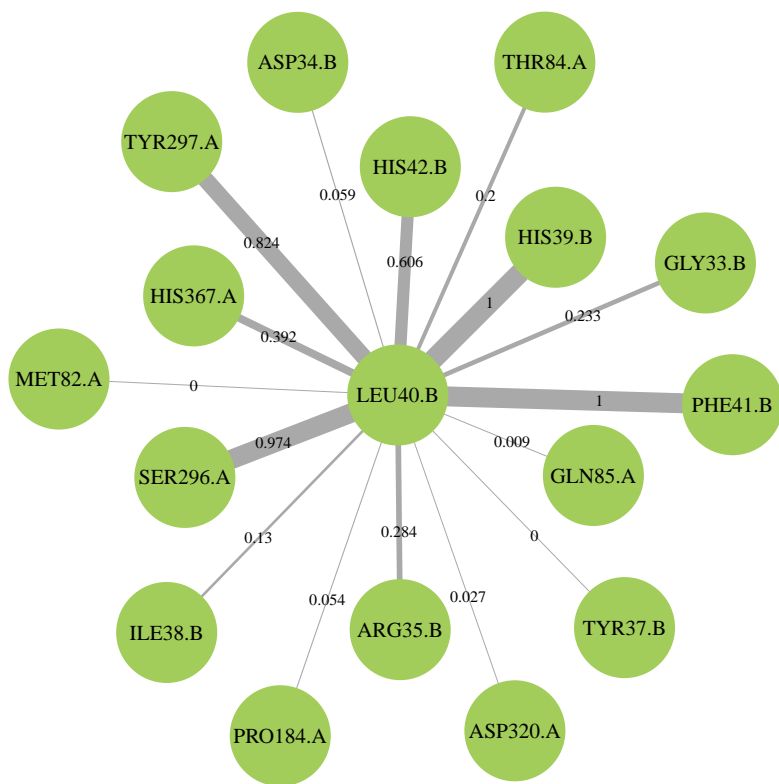

WT  
6.7A contact network

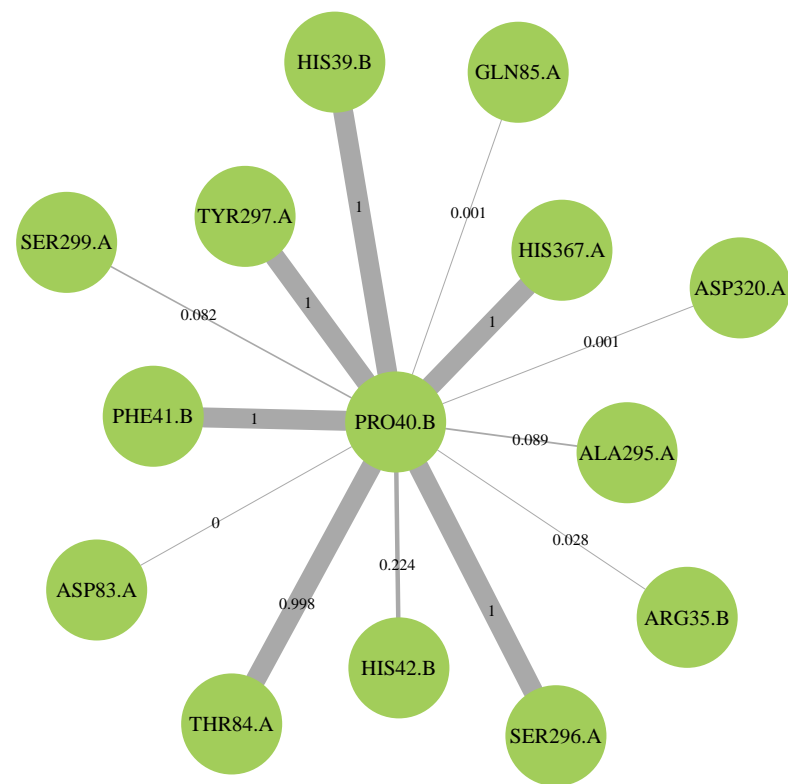

ang\_S49G (Chain B, position 49)  
6.7A contact network

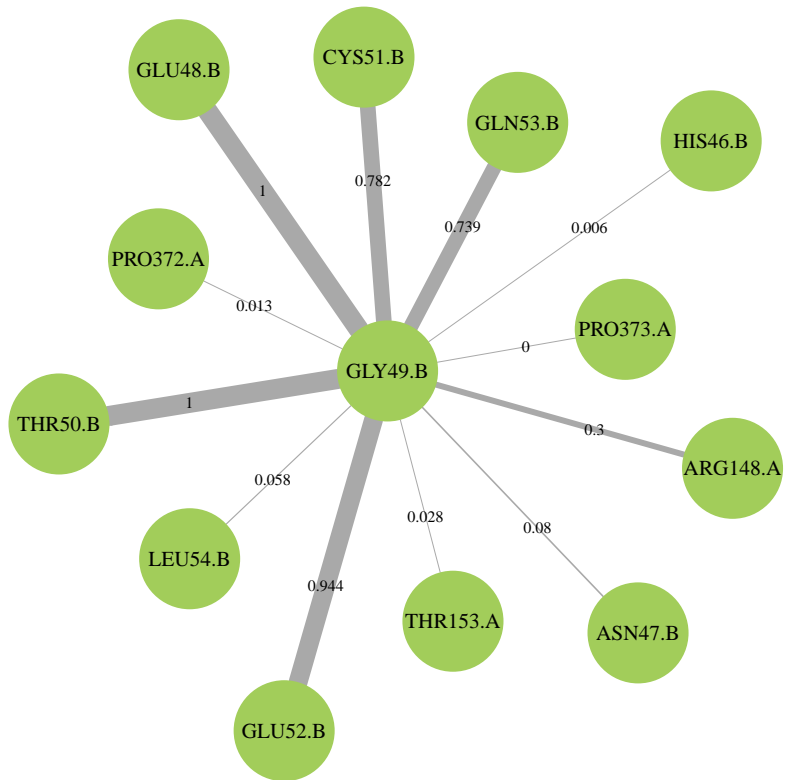

WT  
6.7A contact network

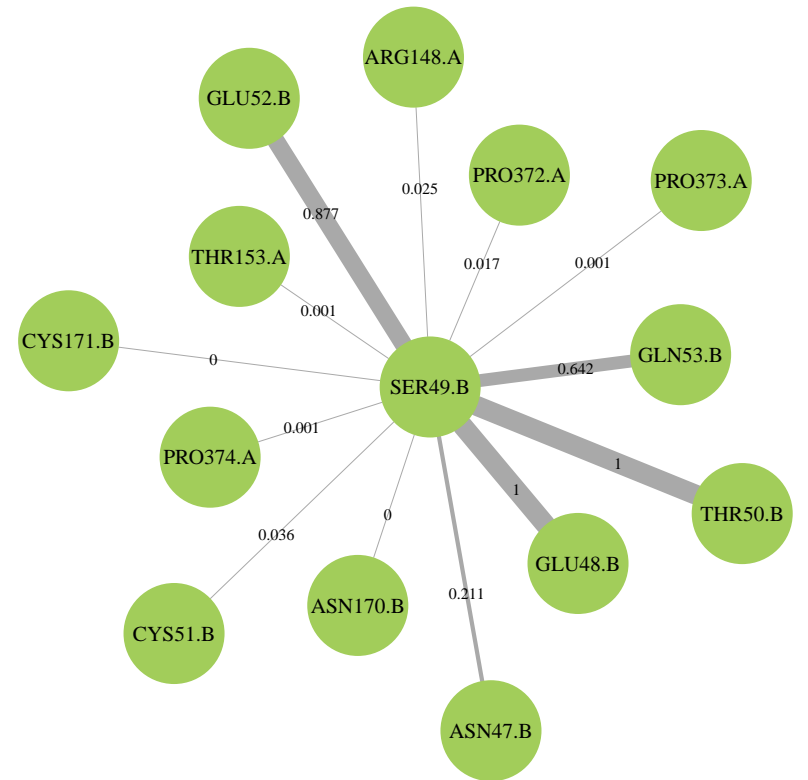



ang\_S49N (Chain B, position 49)  
6.7A contact network

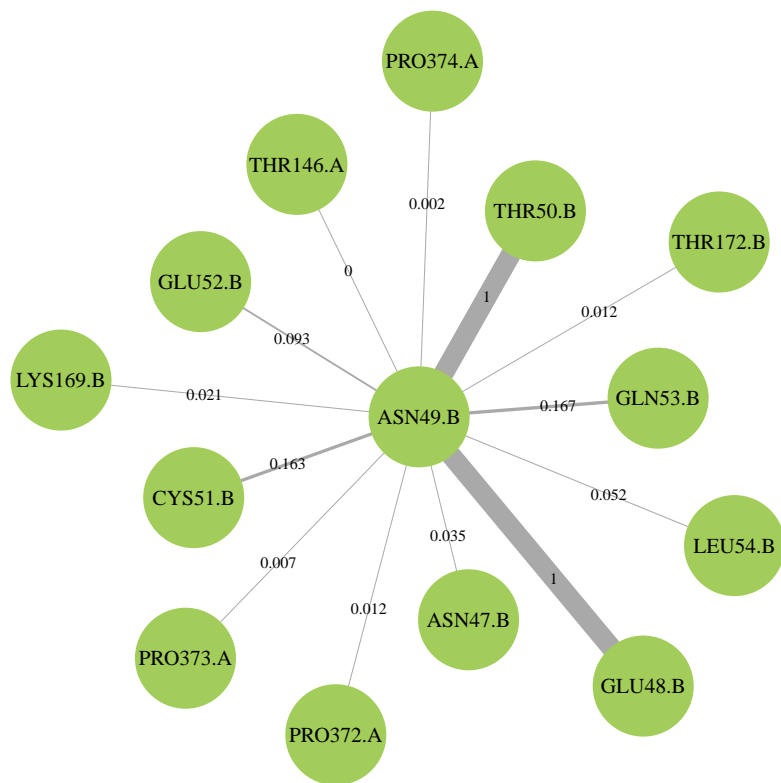

WT  
6.7A contact network

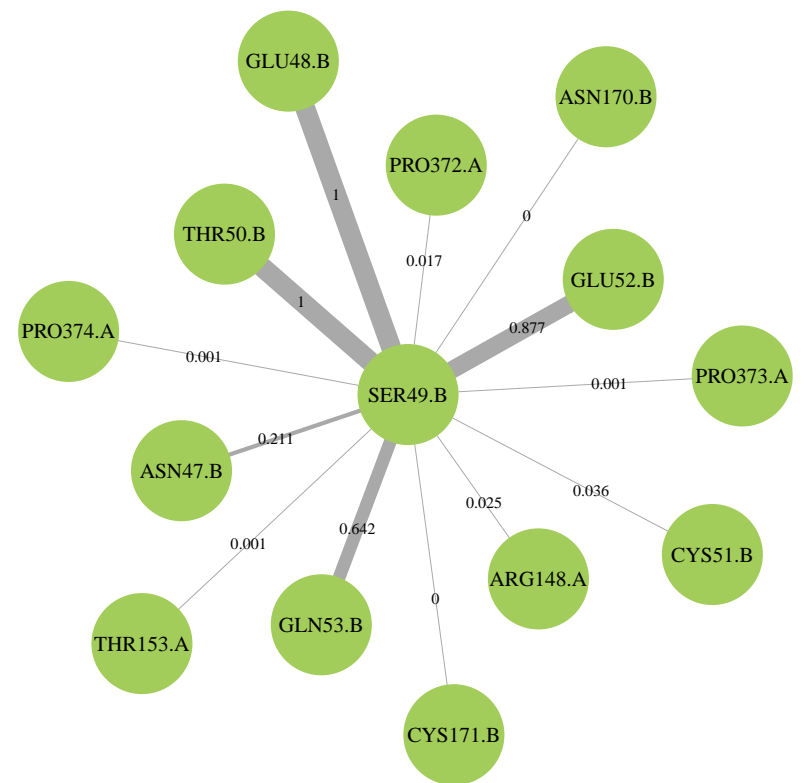

ren\_A188V (Chain A, position 188)  
6.7A contact network

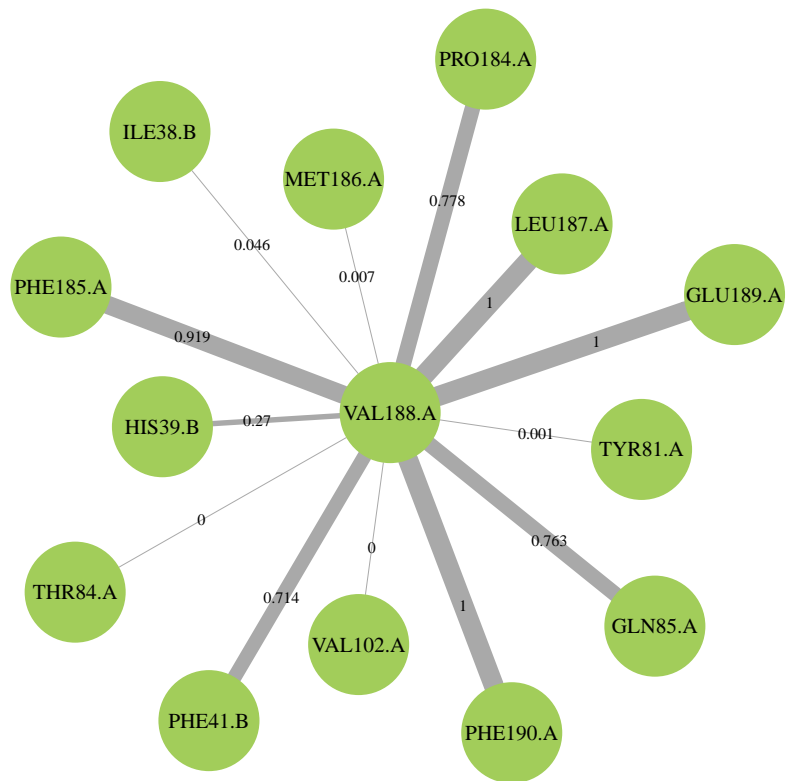

WT  
6.7A contact network

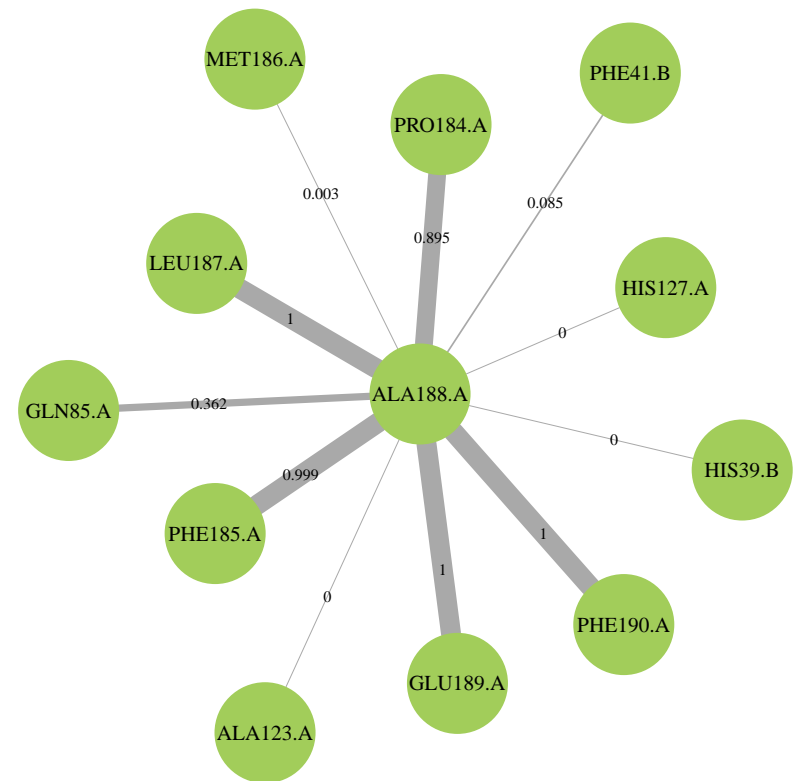

ren\_D104N\_ang\_L43F (Chain A, position 104)  
6.7Å contact network

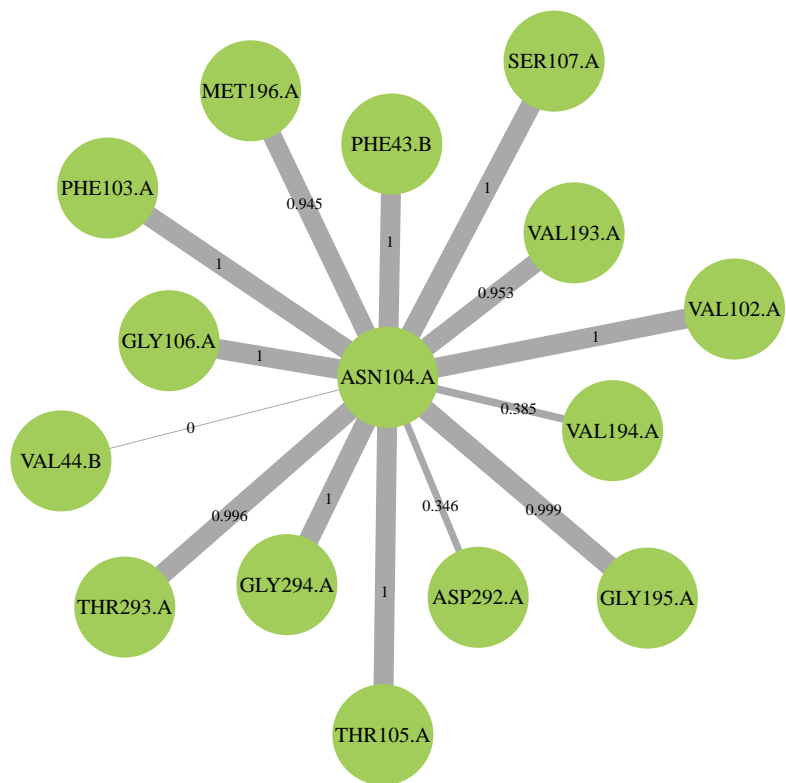

WT  
6.7Å contact network

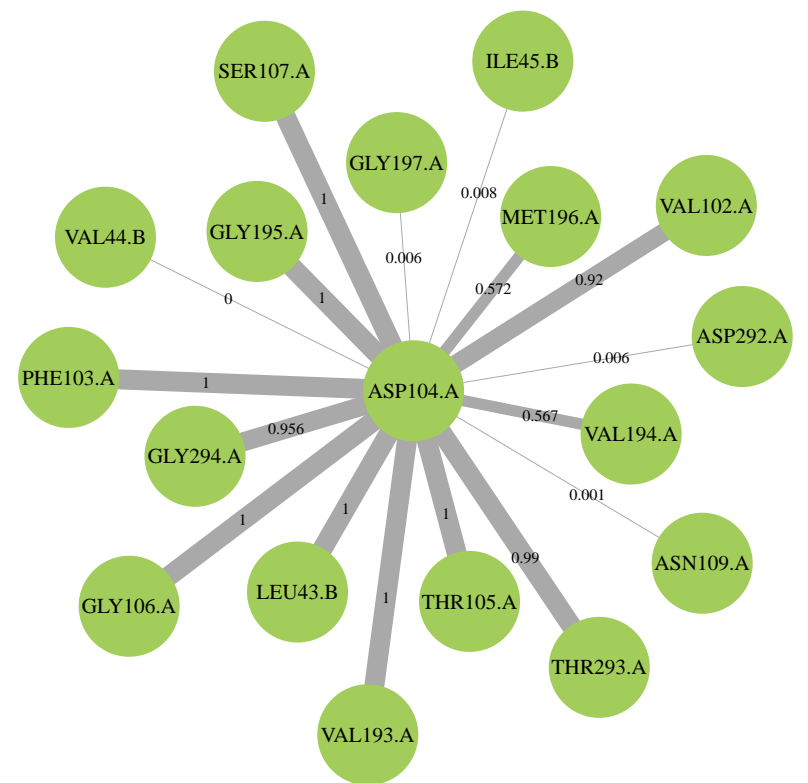

ren\_D104N\_ang\_L43F (Chain B, position 43)  
6.7A contact network

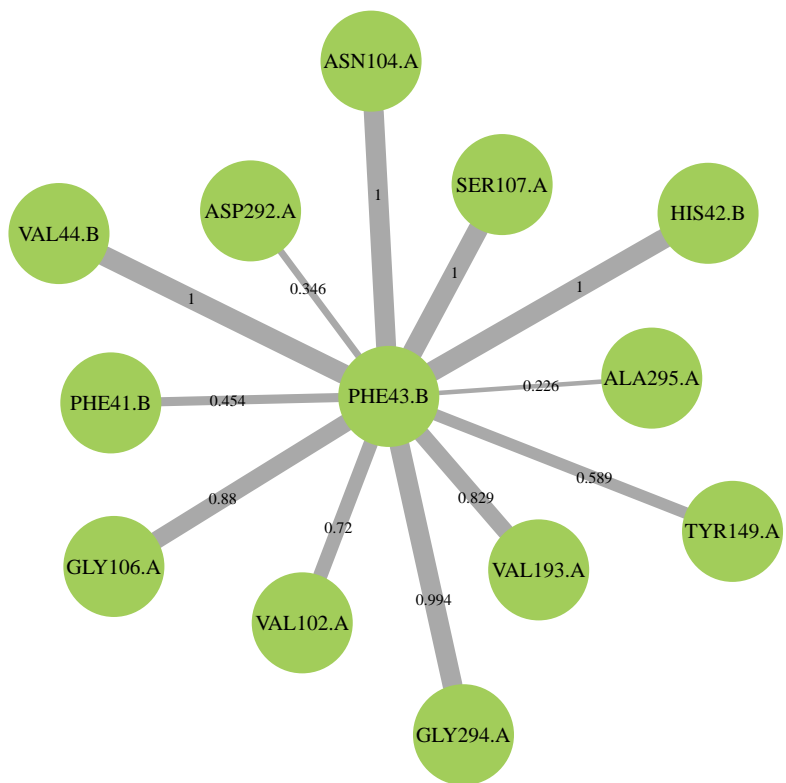

WT  
6.7A contact network

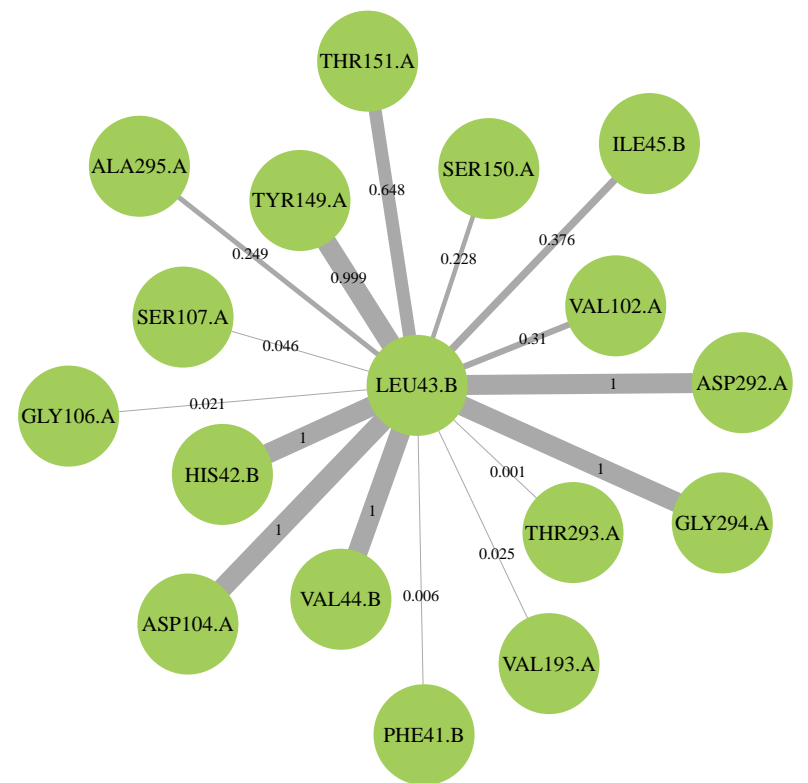

ren\_D104N (Chain A, position 104)  
6.7A contact network

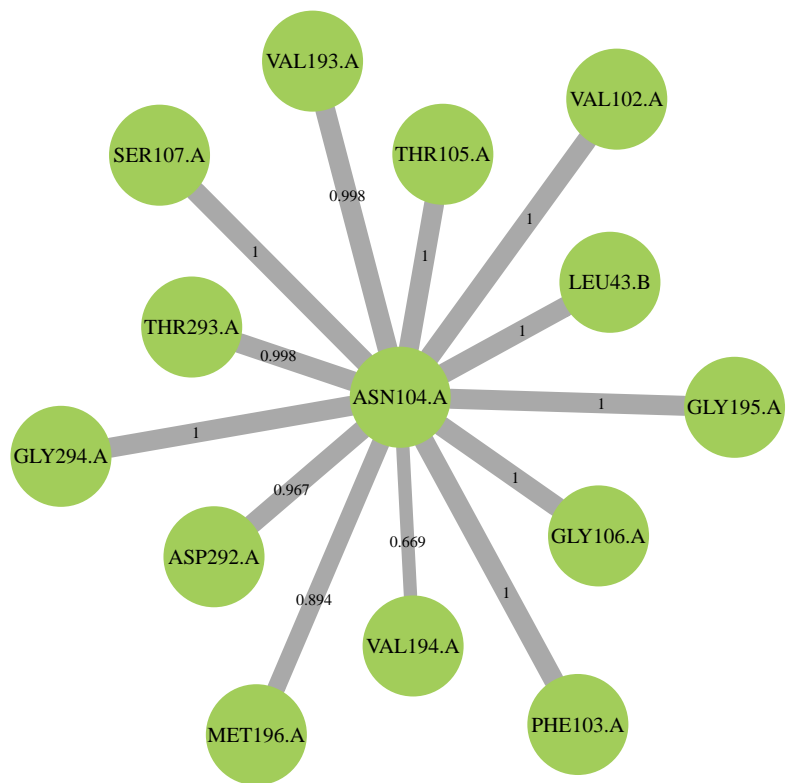

WT  
6.7A contact network

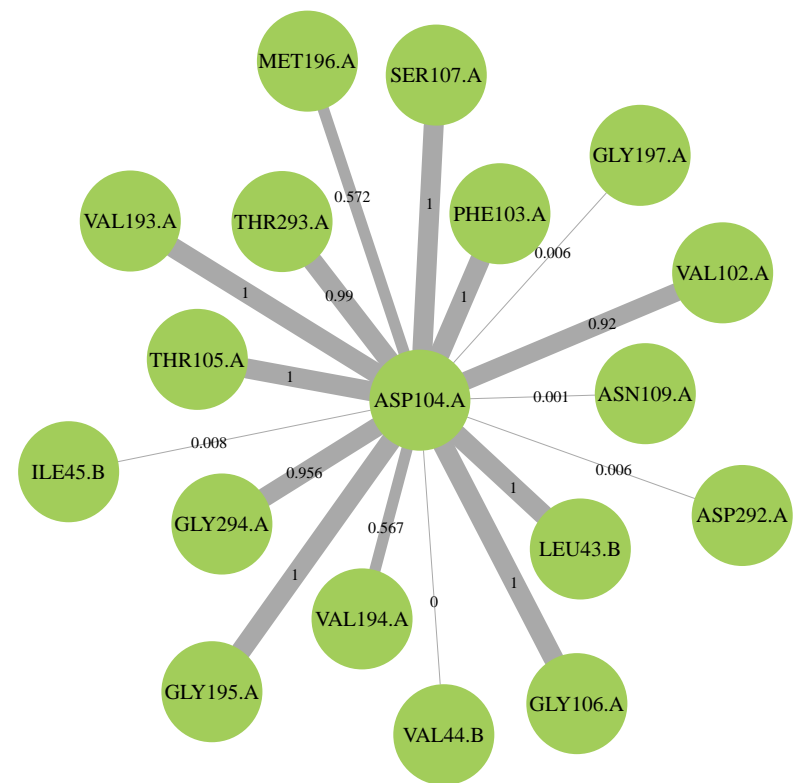

ren\_F319V\_ang\_A104T (Chain A, position 319)  
6.7A contact network

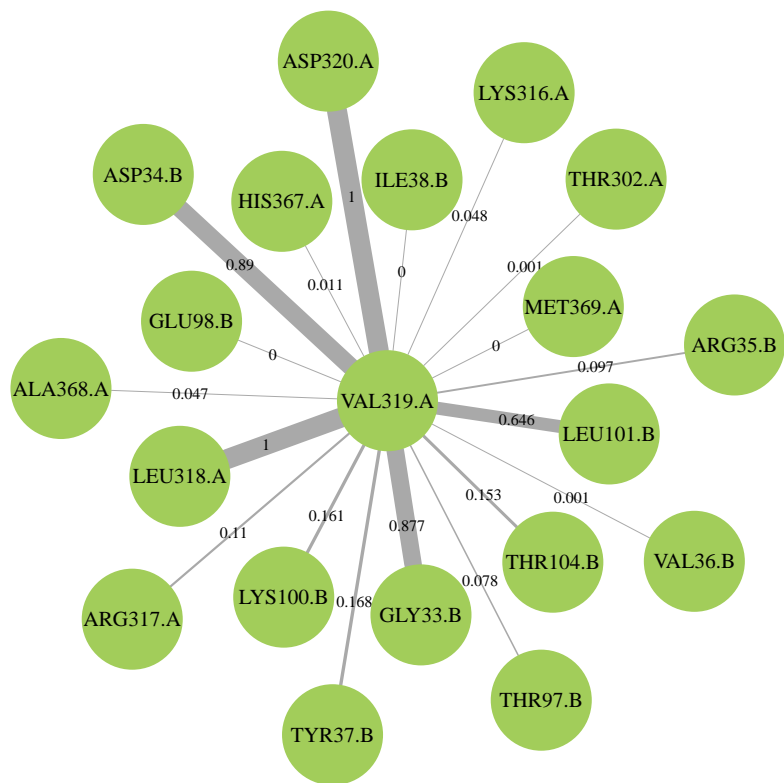

WT  
6.7A contact network

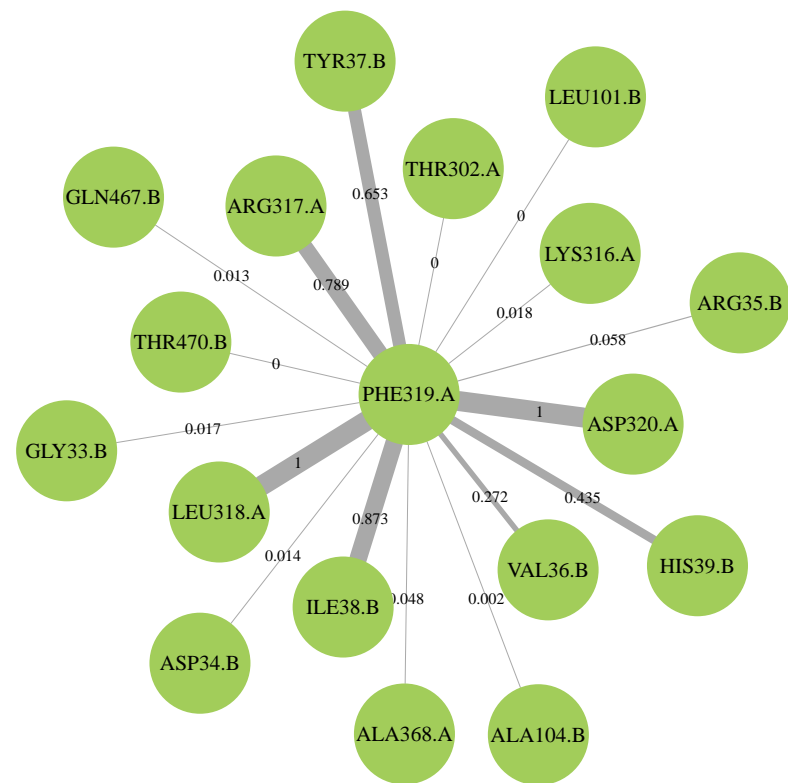

ren\_F319V\_ang\_A104T (Chain B, position 104)  
6.7A contact network

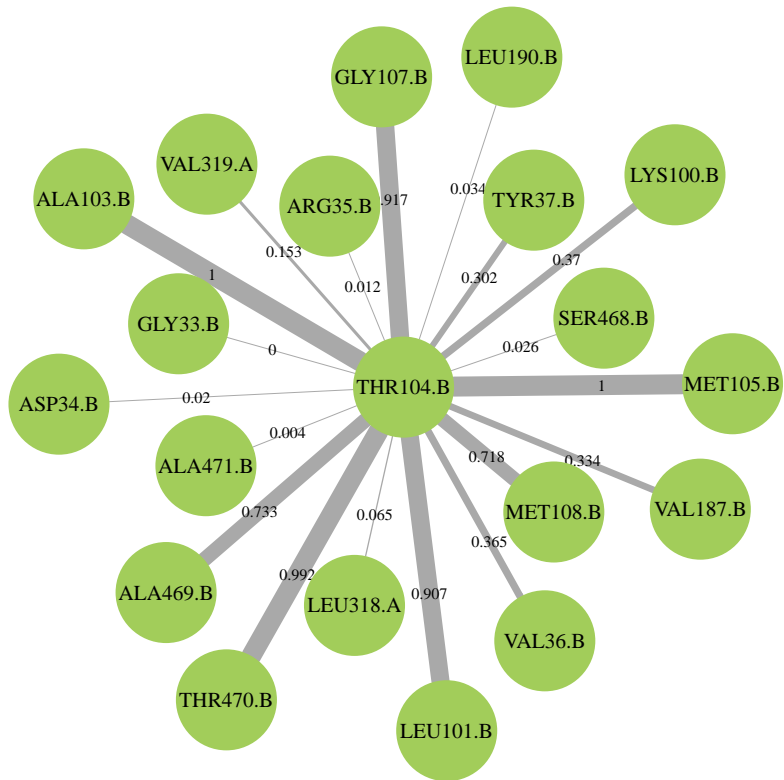

WT  
6.7A contact network

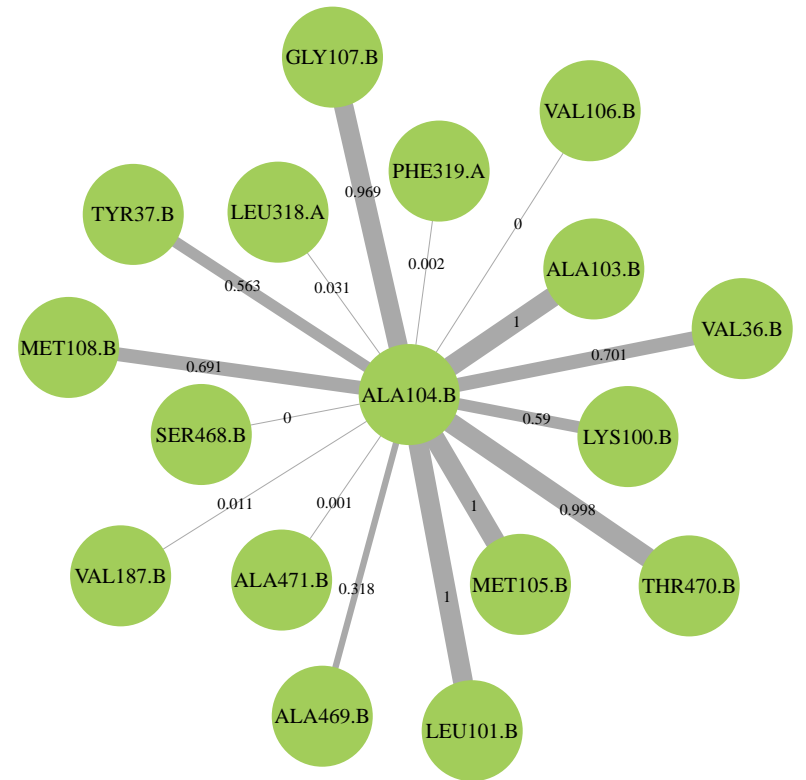

ren\_F319V\_ang\_M105V (Chain A, position 319)  
6.7Å contact network

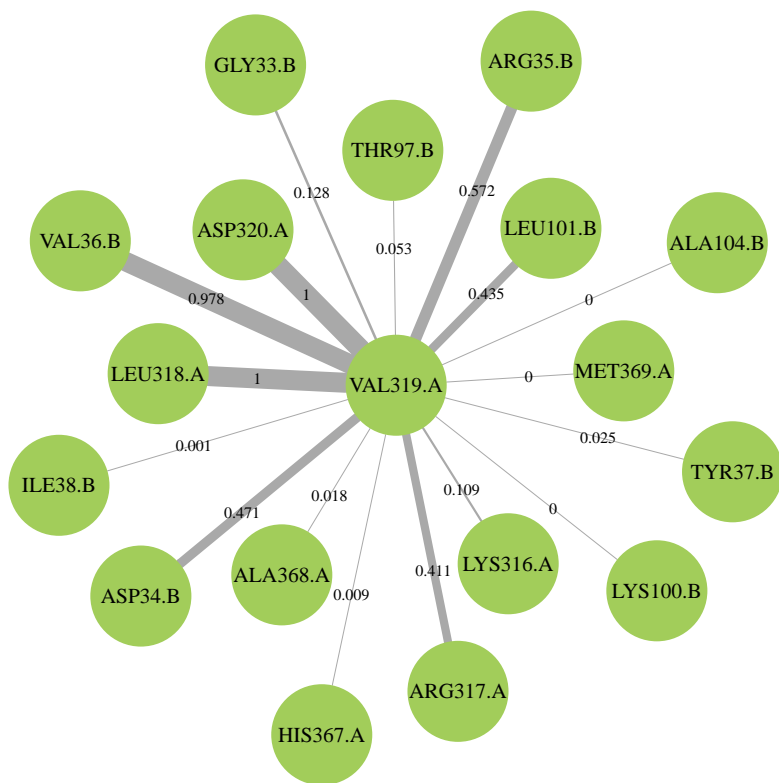

WT  
6.7Å contact network

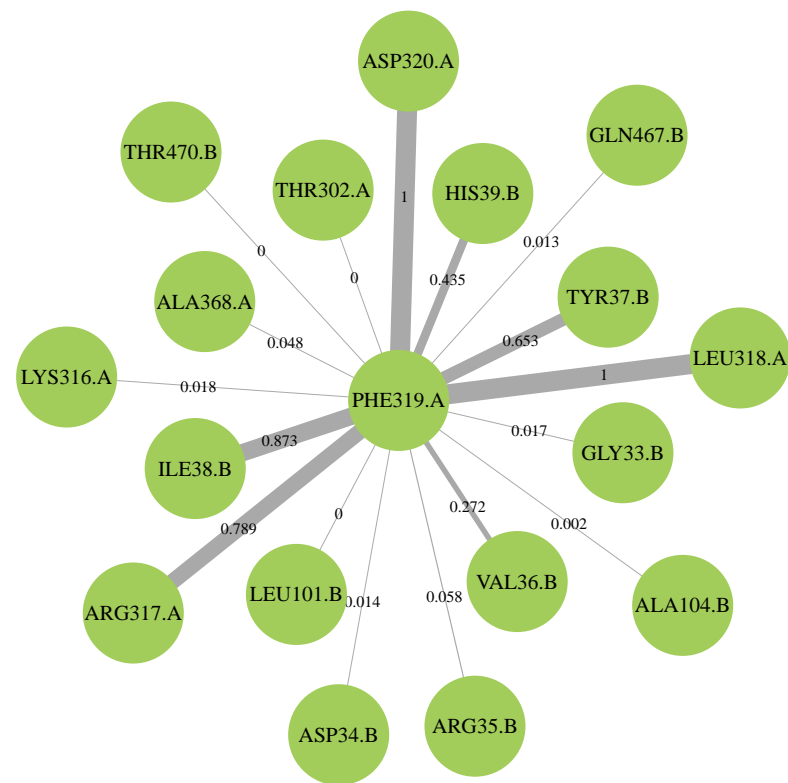



ren\_F319V\_ang\_M105V (Chain B, position 105)  
6.7A contact network

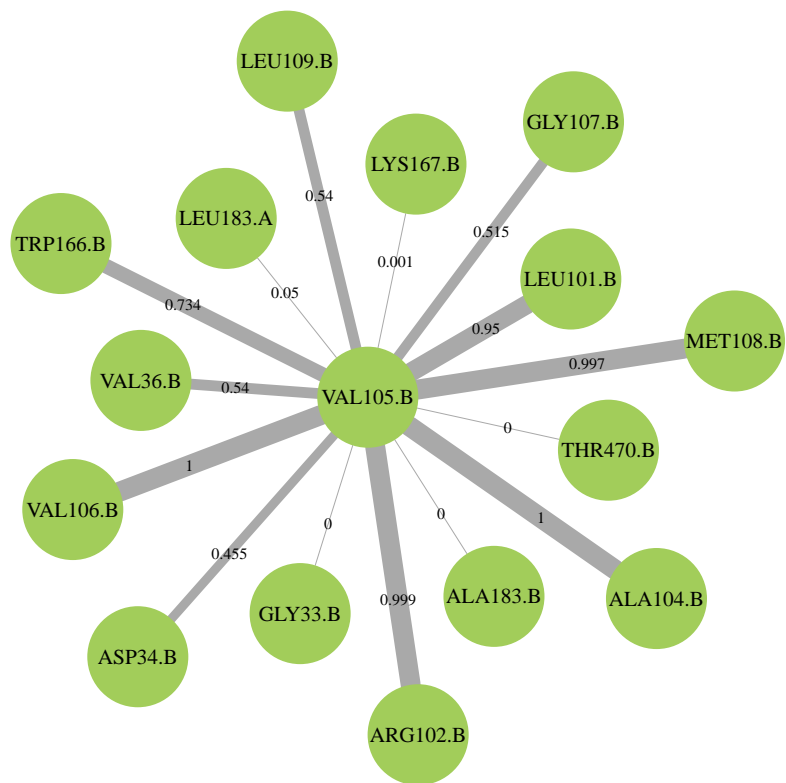

WT  
6.7A contact network

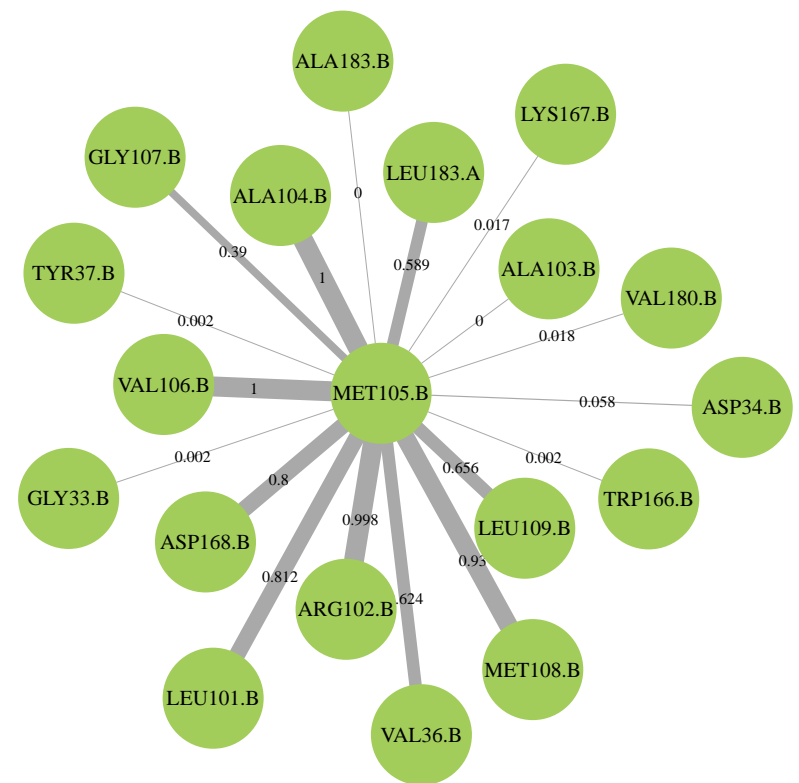

ren\_F319V (Chain A, position 319)  
6.7A contact network

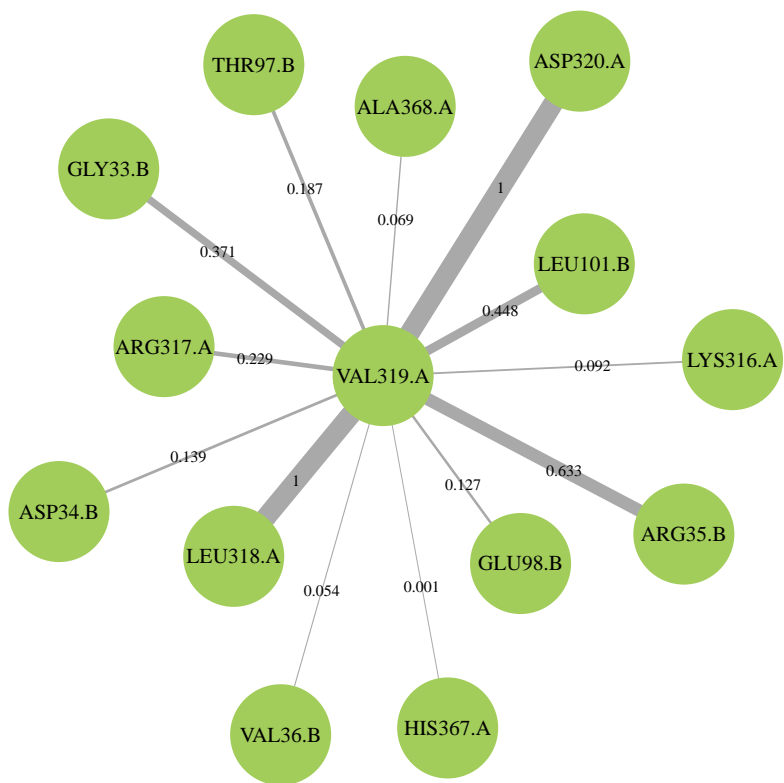

WT  
6.7A contact network

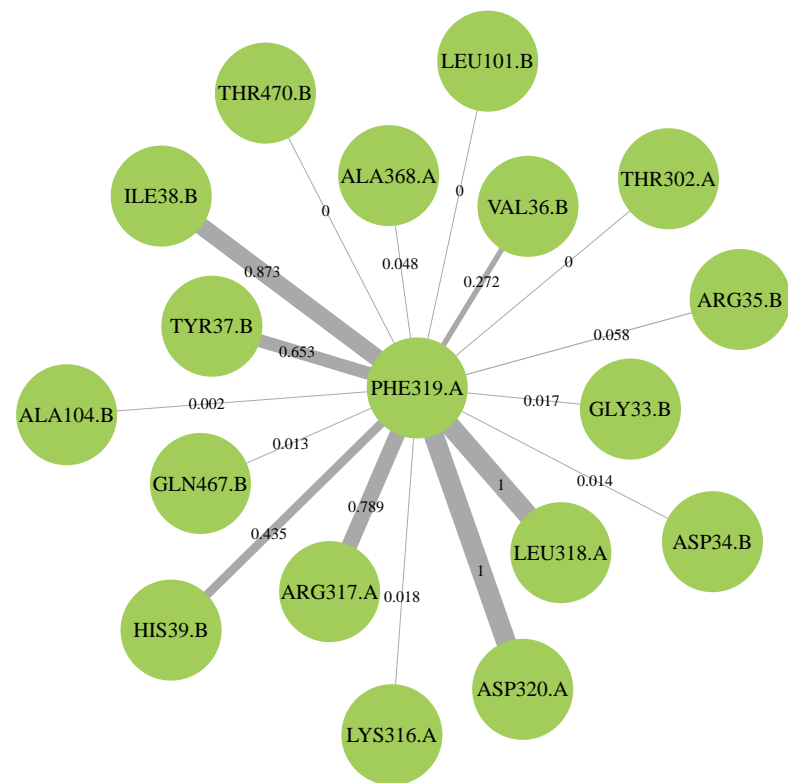

ren\_L318R\_ang\_A104T (Chain A, position 318)  
6.7A contact network

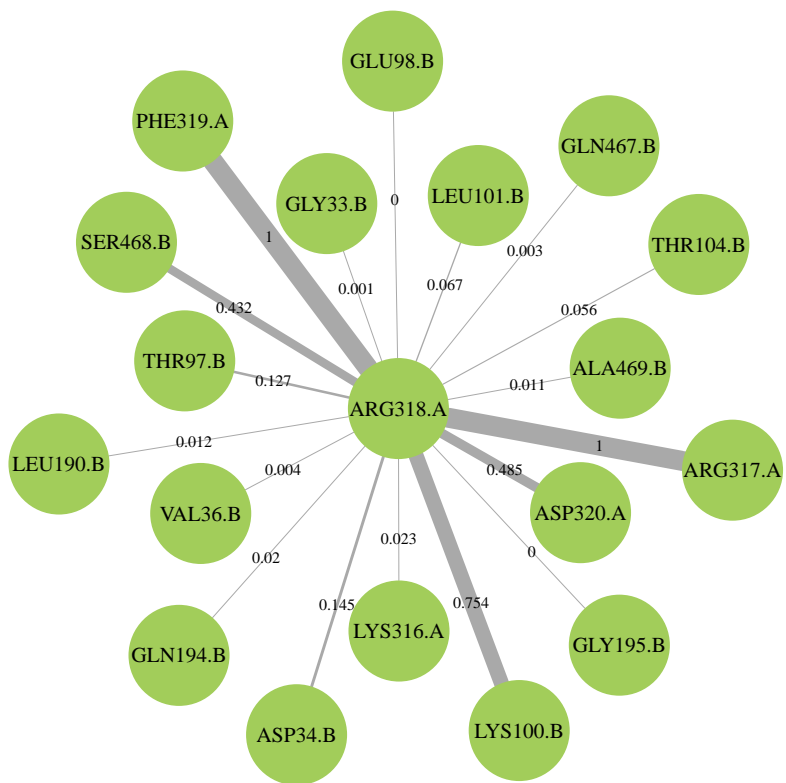

WT  
6.7A contact network

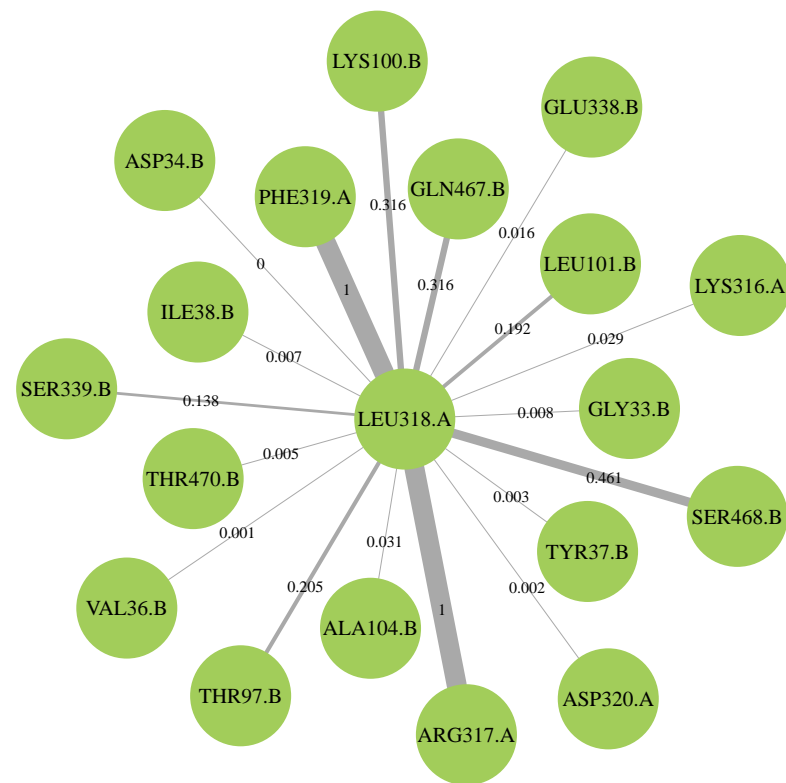

ren\_L318R\_ang\_A104T (Chain B, position 104)  
6.7A contact network

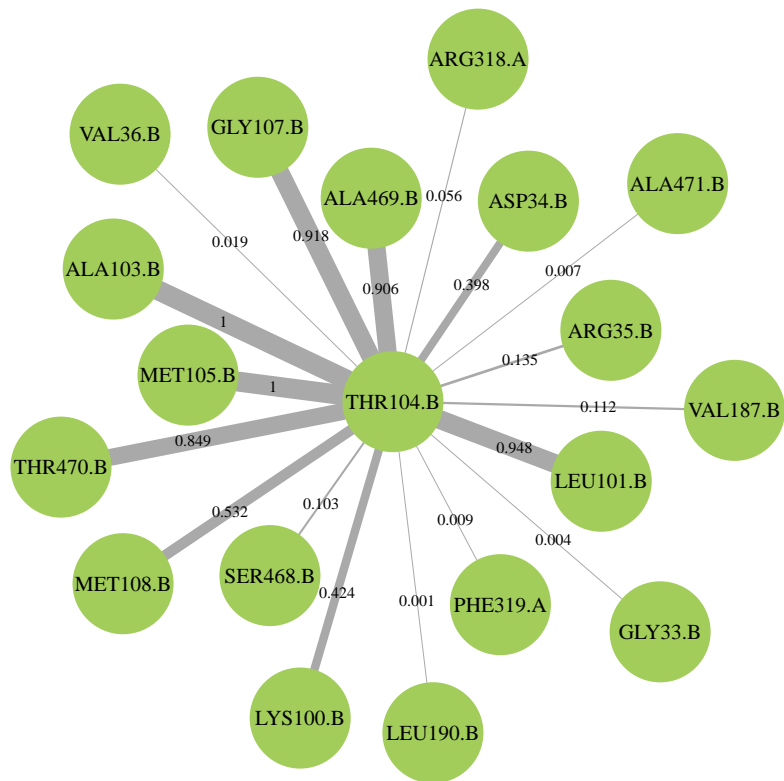

WT  
6.7A contact network

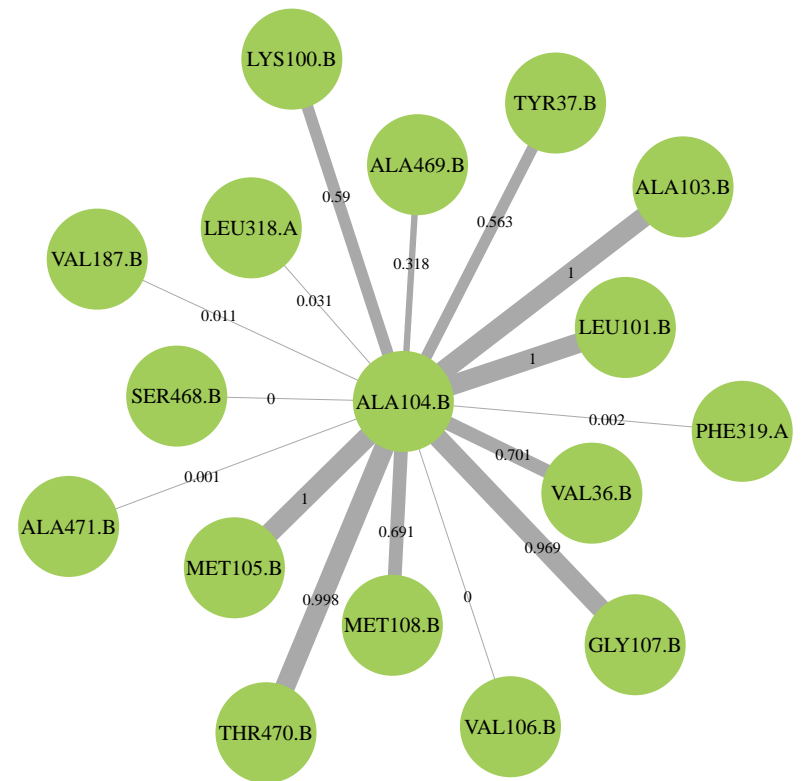

ren\_R148C\_ang\_E48K (Chain A, position 148)  
6.7Å contact network

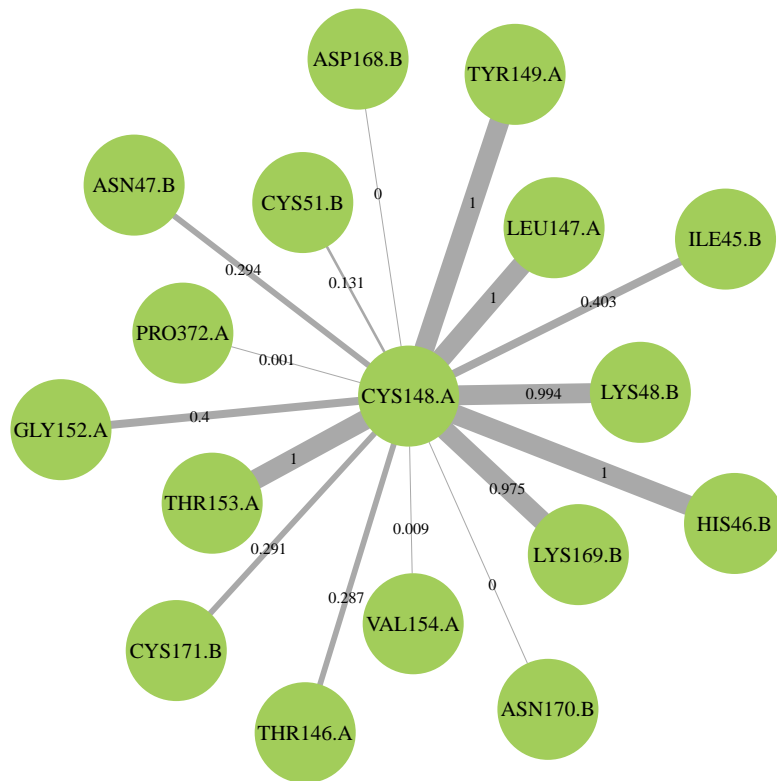

WT  
6.7Å contact network

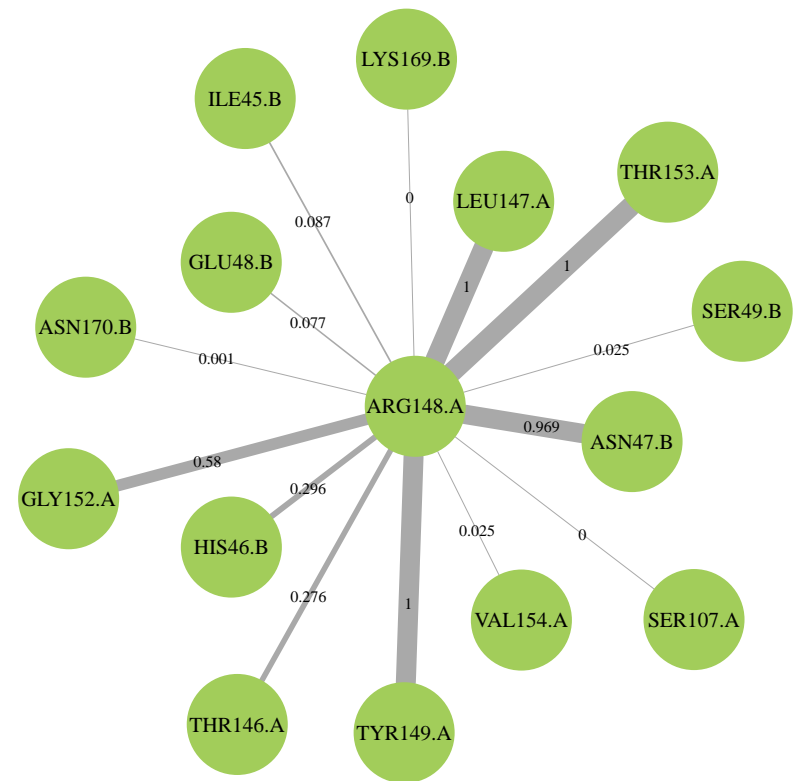

ren\_R148C\_ang\_E48K (Chain B, position 48)  
6.7A contact network

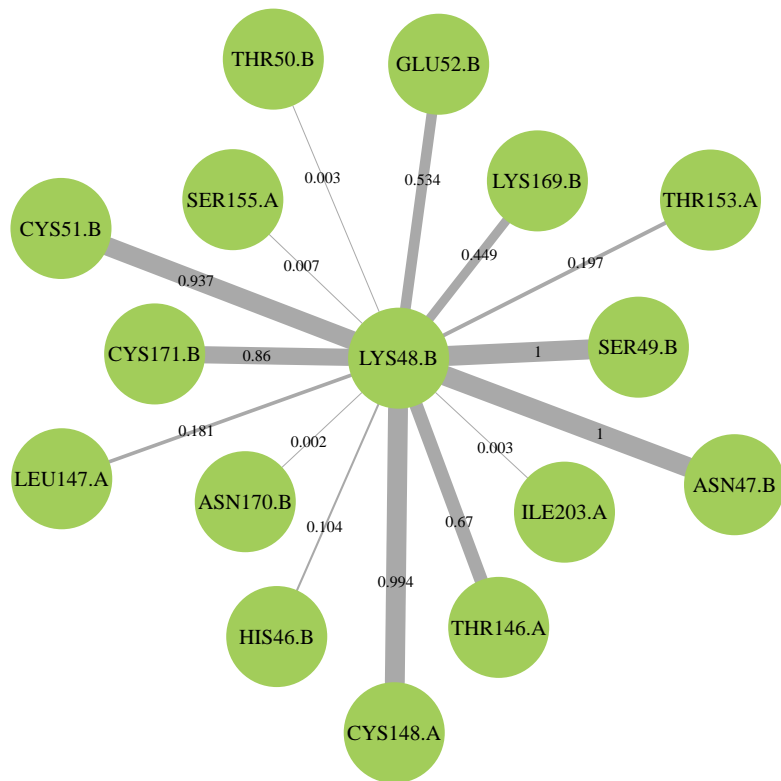

WT  
6.7A contact network

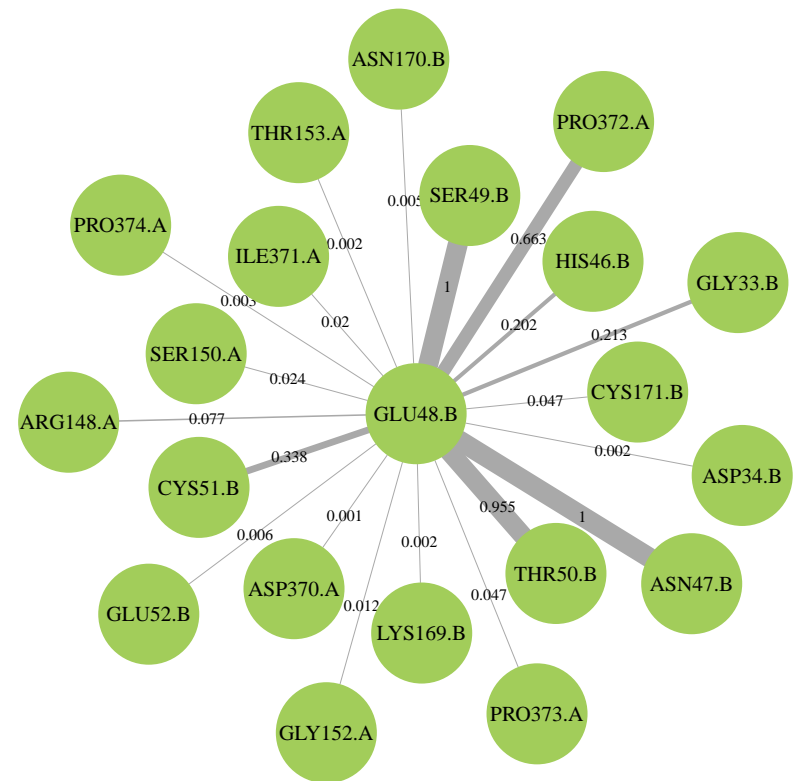

ren\_R148C\_ang\_S49G (Chain A, position 148)  
6.7A contact network

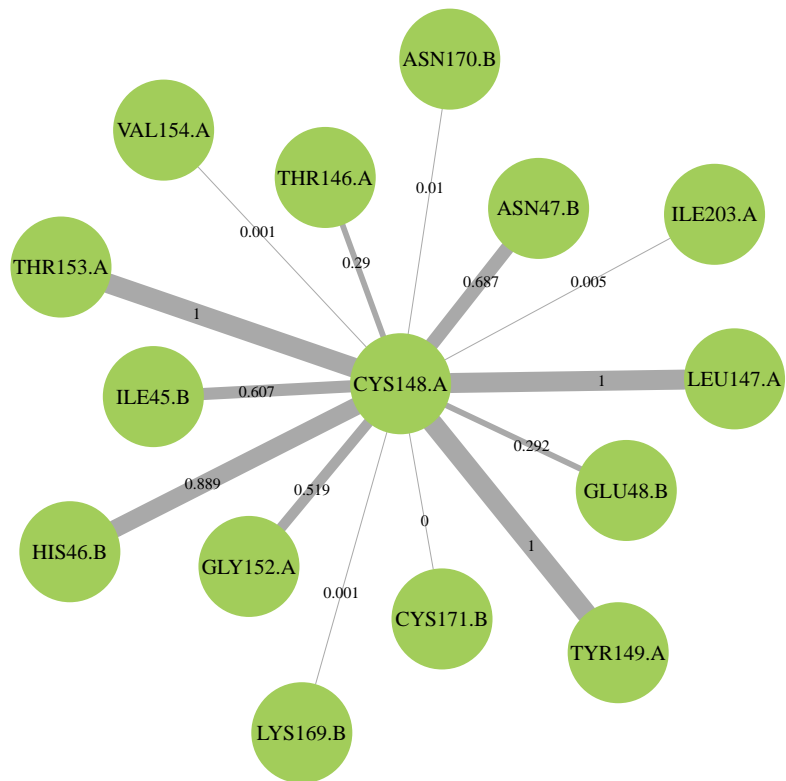

WT  
6.7A contact network

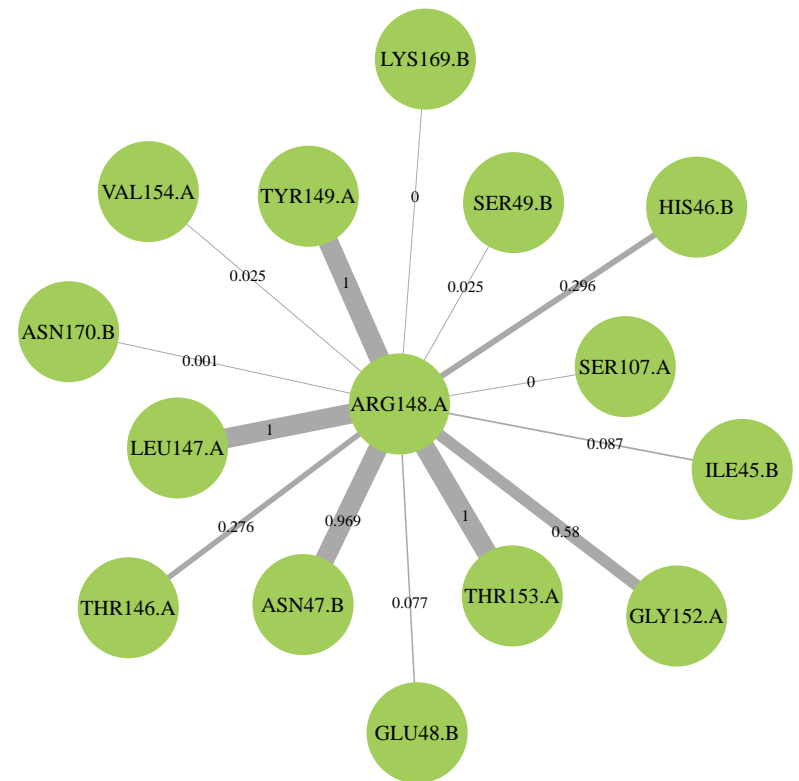

ren\_R148C\_ang\_S49G (Chain B, position 49)  
6.7A contact network

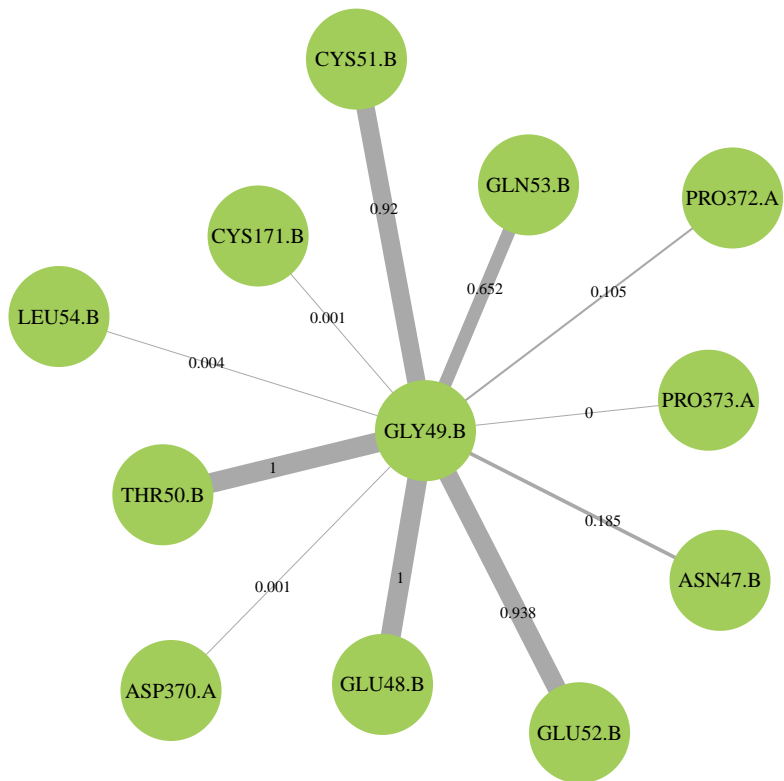

WT  
6.7A contact network

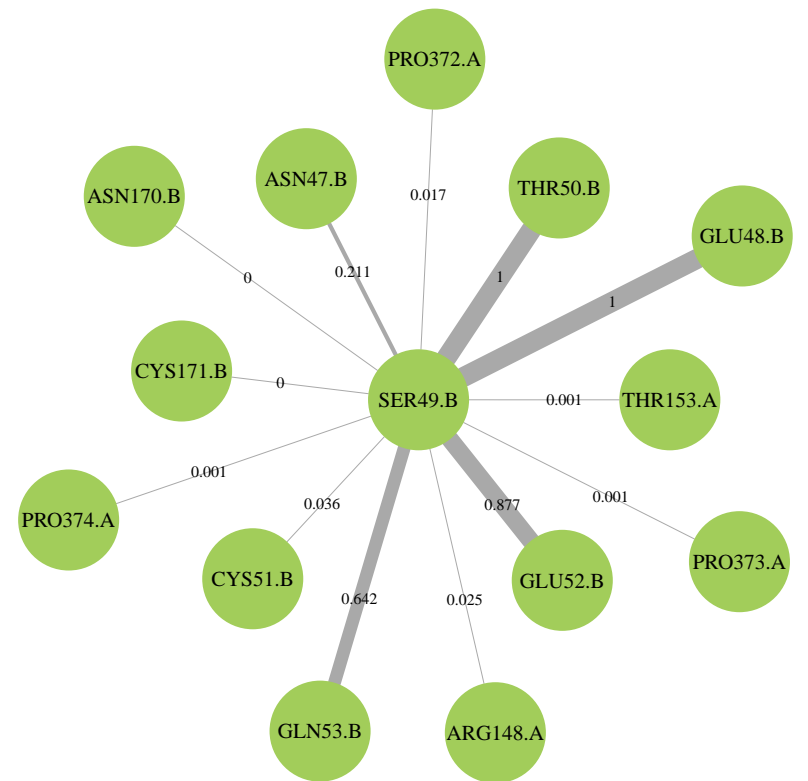



ren\_R148C\_ang\_S49N (Chain A, position 148)  
6.7Å contact network

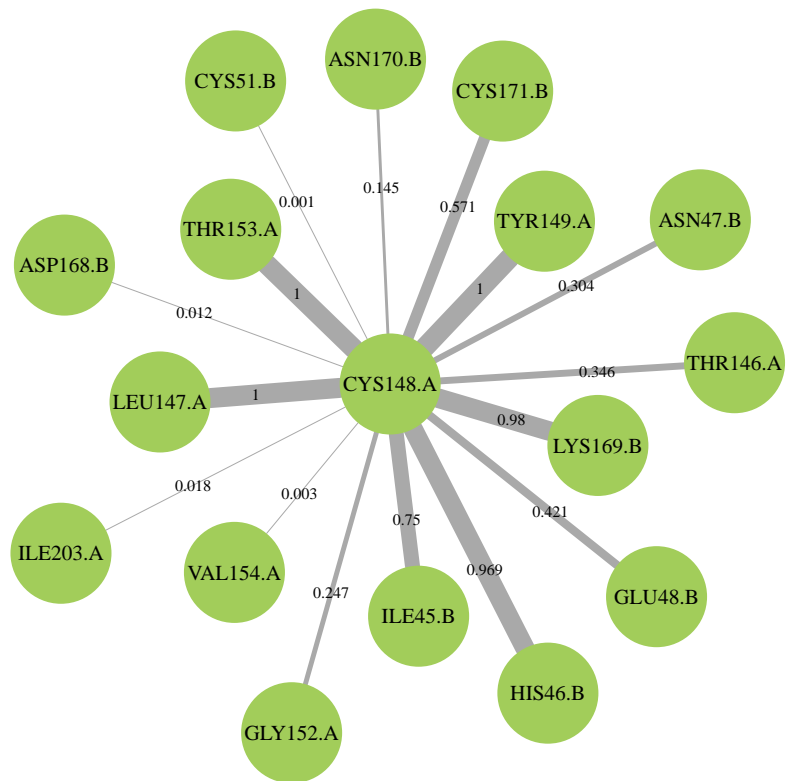

WT  
6.7Å contact network

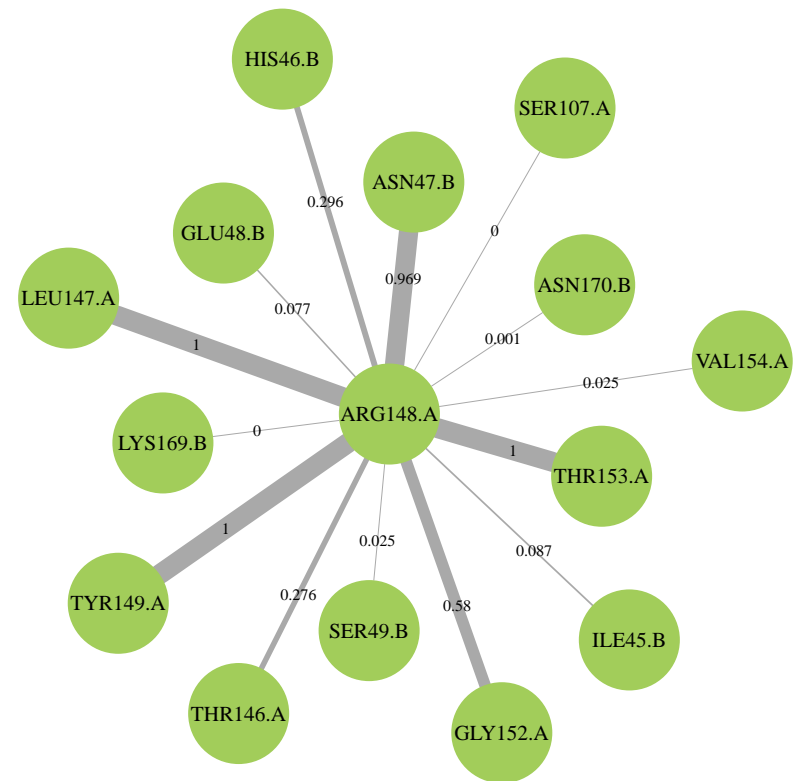

ren\_R148C\_ang\_S49N (Chain B, position 49)  
6.7A contact network

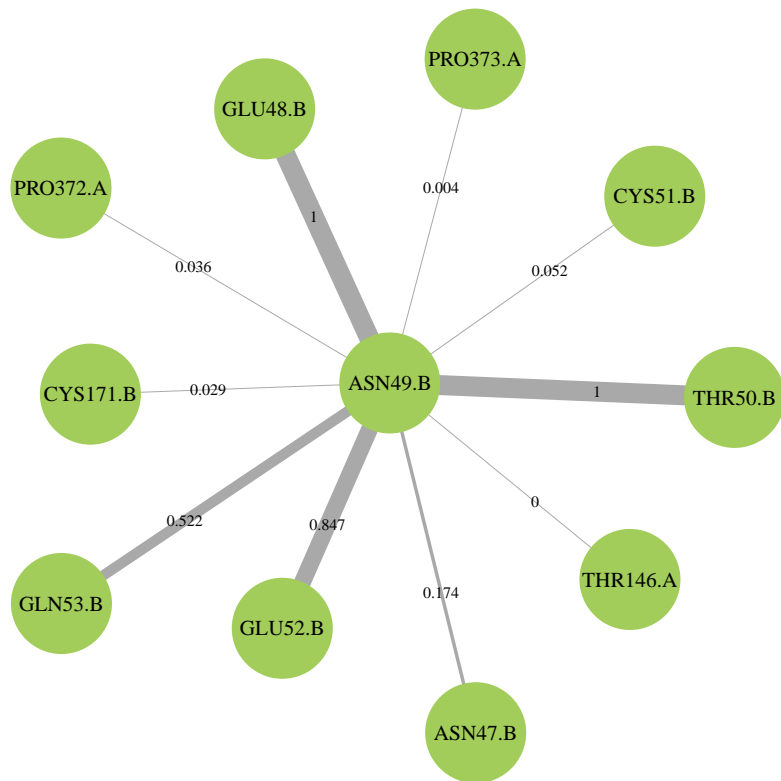

WT  
6.7A contact network

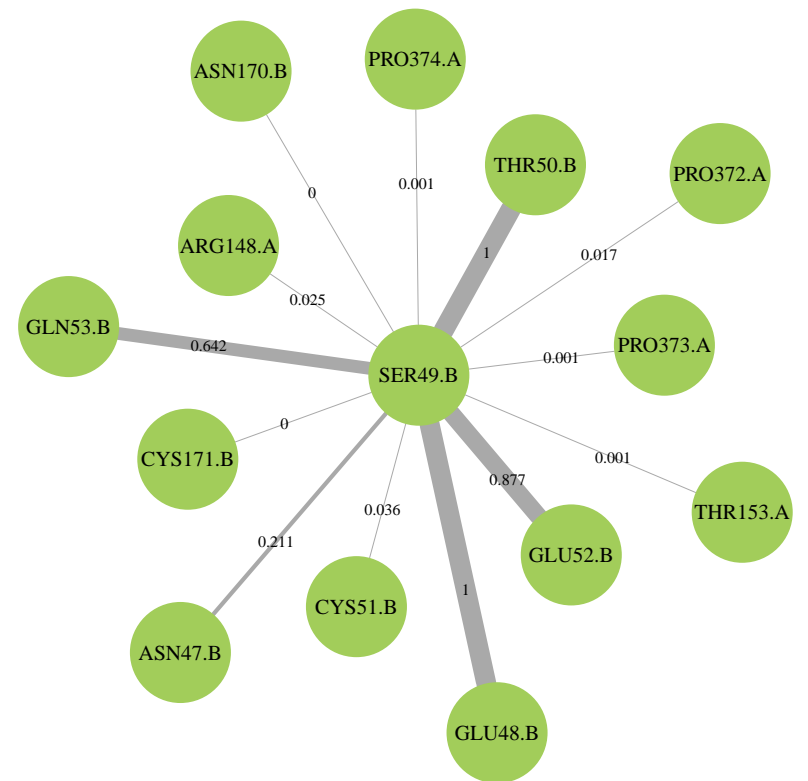

ren\_R148C (Chain A, position 148)  
6.7A contact network

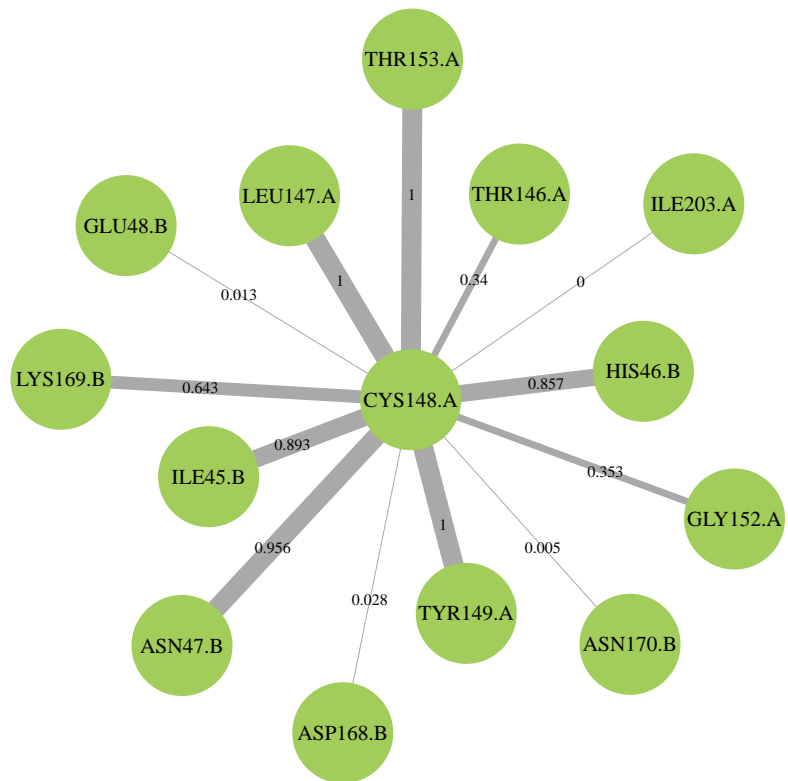

WT  
6.7A contact network

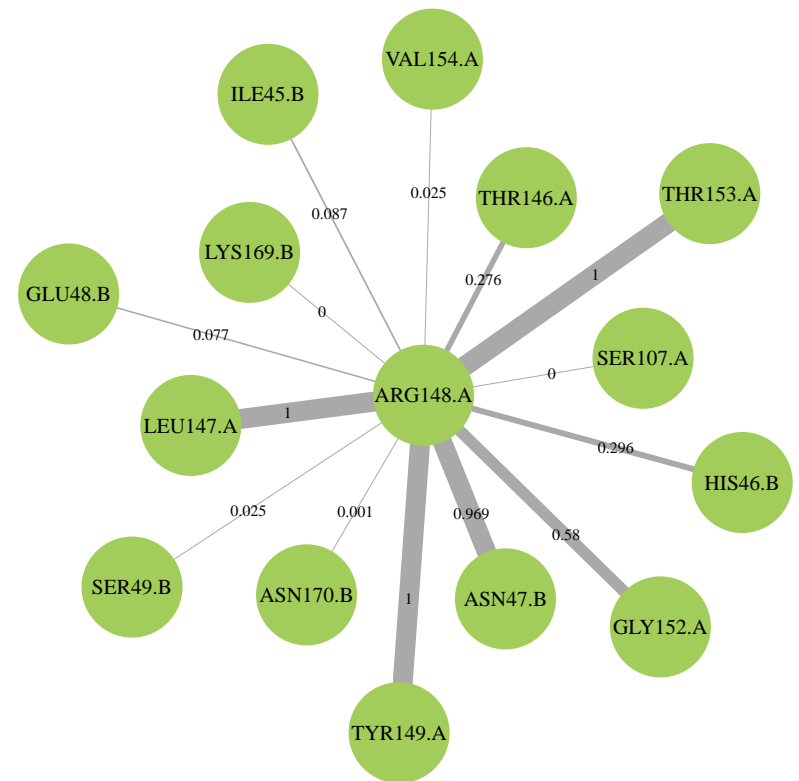

ren\_R148H\_ang\_E48K (Chain A, position 148)  
6.7Å contact network

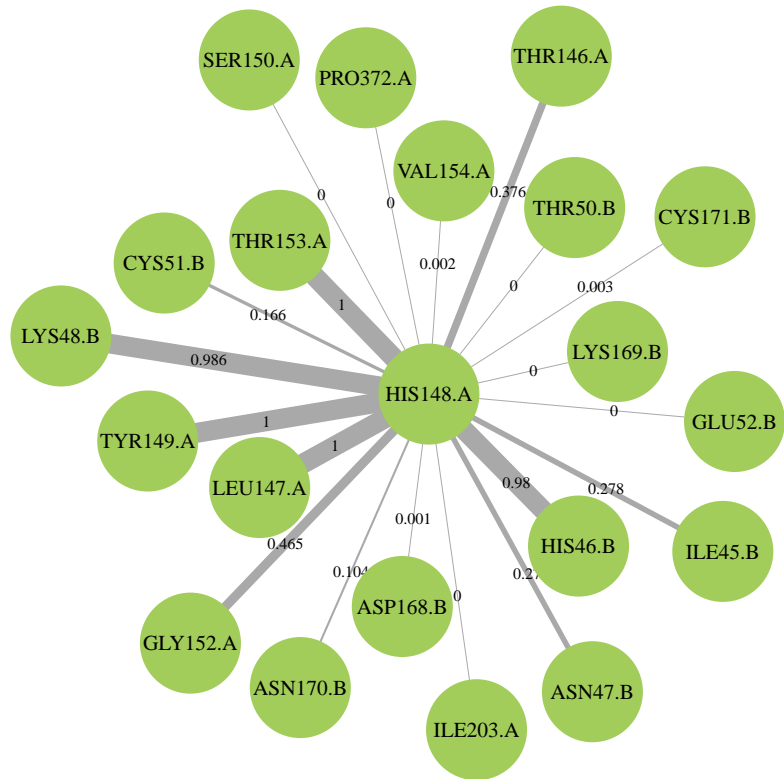

WT  
6.7Å contact network

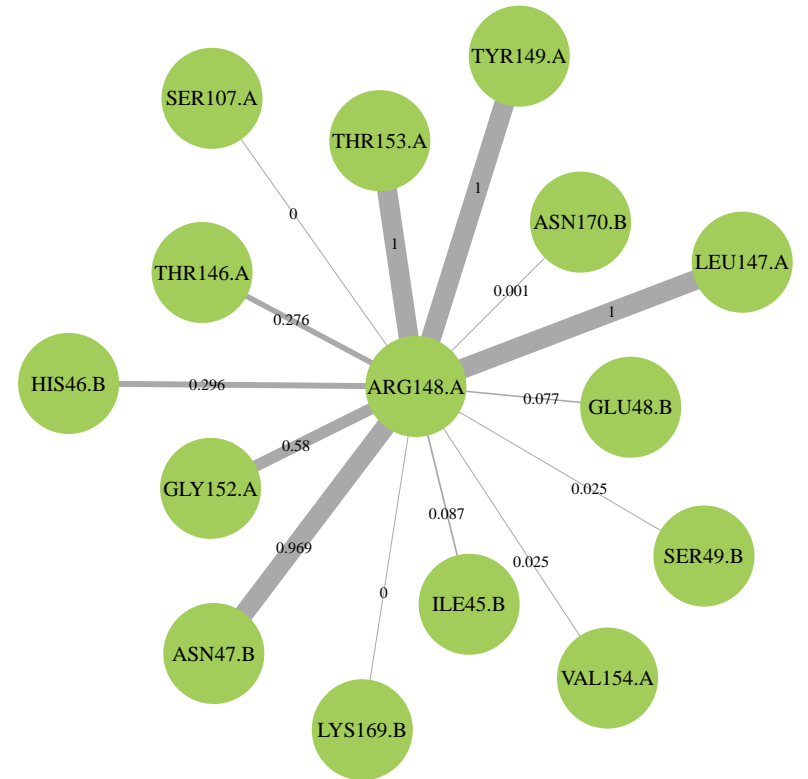

ren\_R148H\_ang\_E48K (Chain B, position 48)  
6.7A contact network

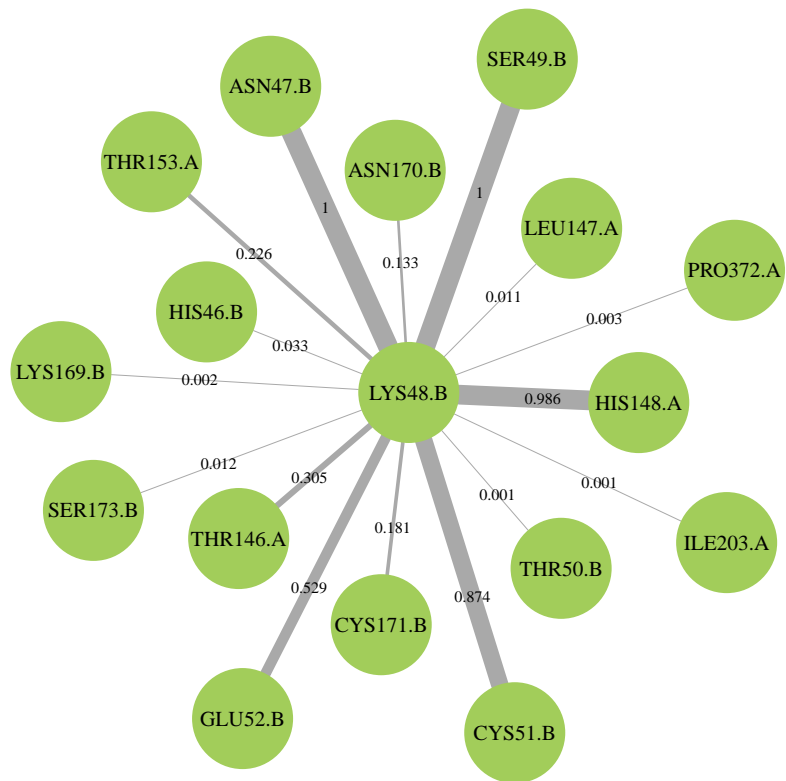

WT  
6.7A contact network

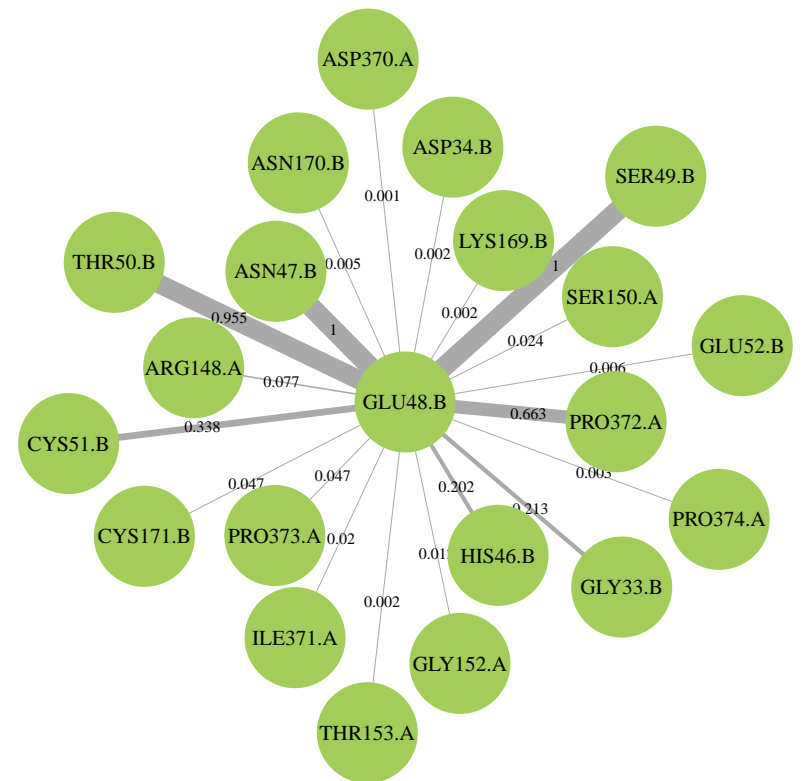

ren\_R148H\_ang\_S49G (Chain A, position 148)  
6.7A contact network

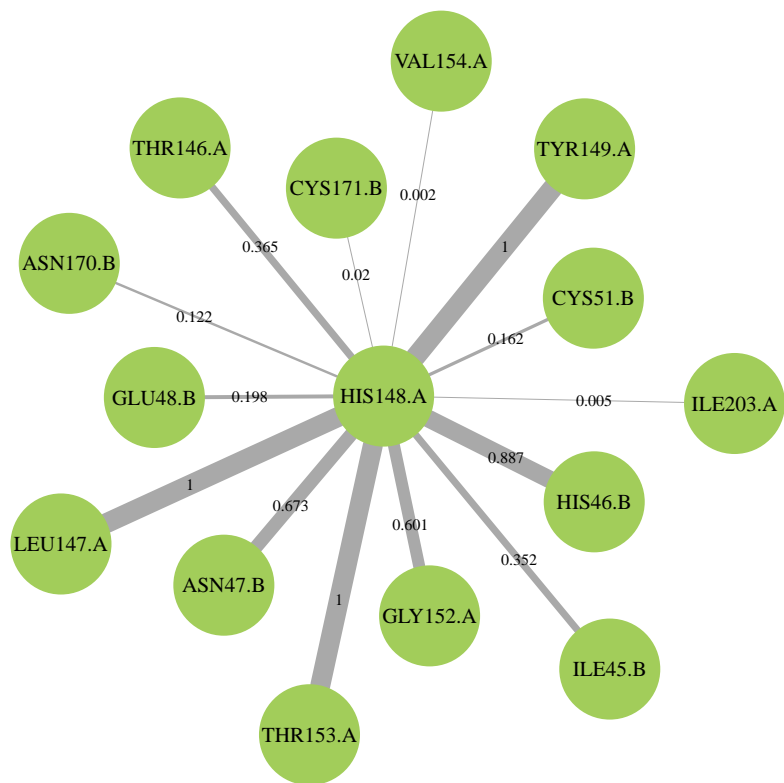

WT  
6.7A contact network

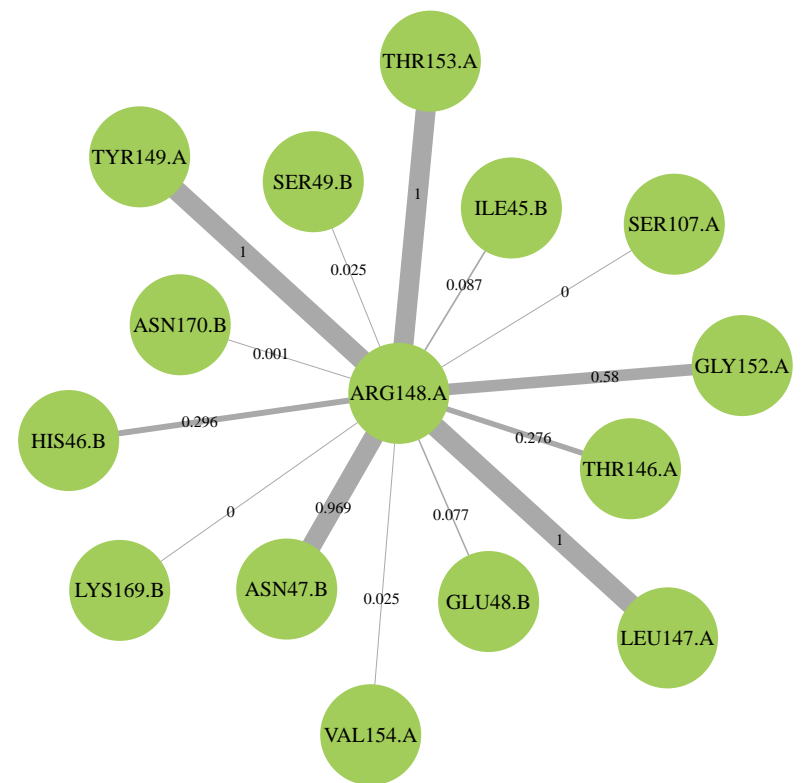

ren\_R148H\_ang\_S49G (Chain B, position 49)  
6.7A contact network

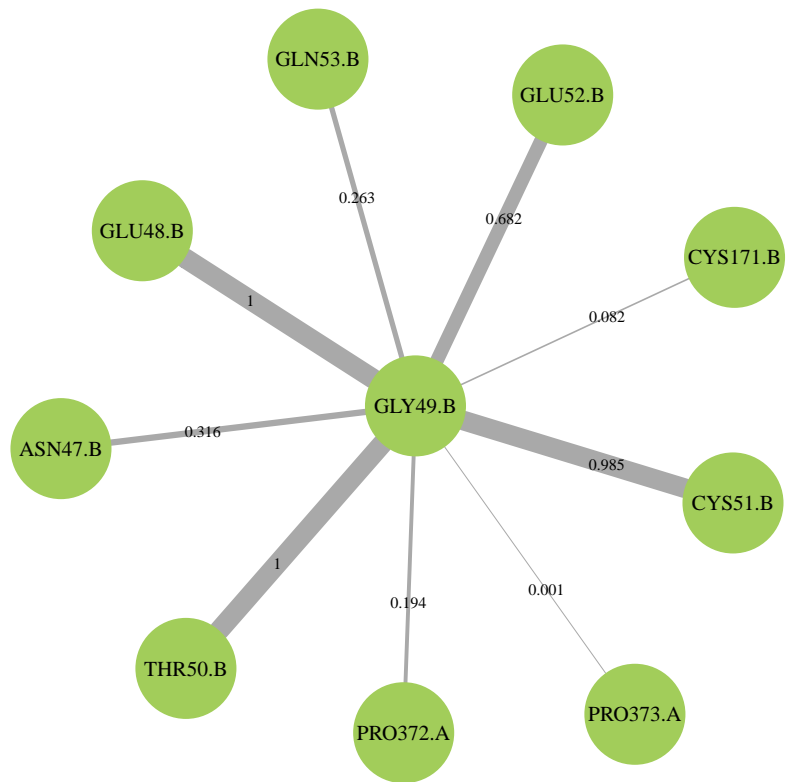

WT  
6.7A contact network

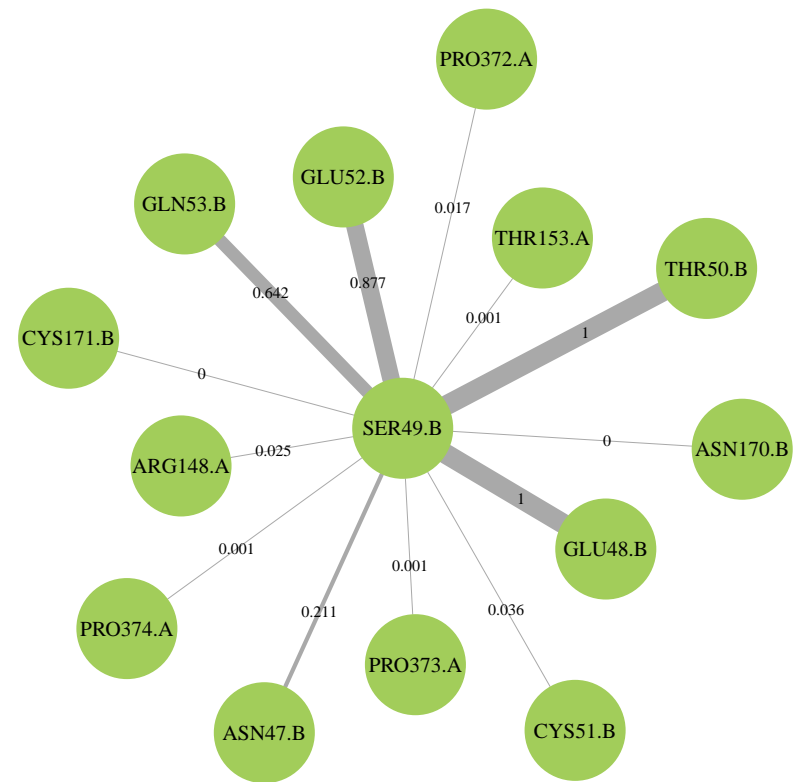

ren\_R148H\_ang\_S49N (Chain A, position 148)  
6.7A contact network

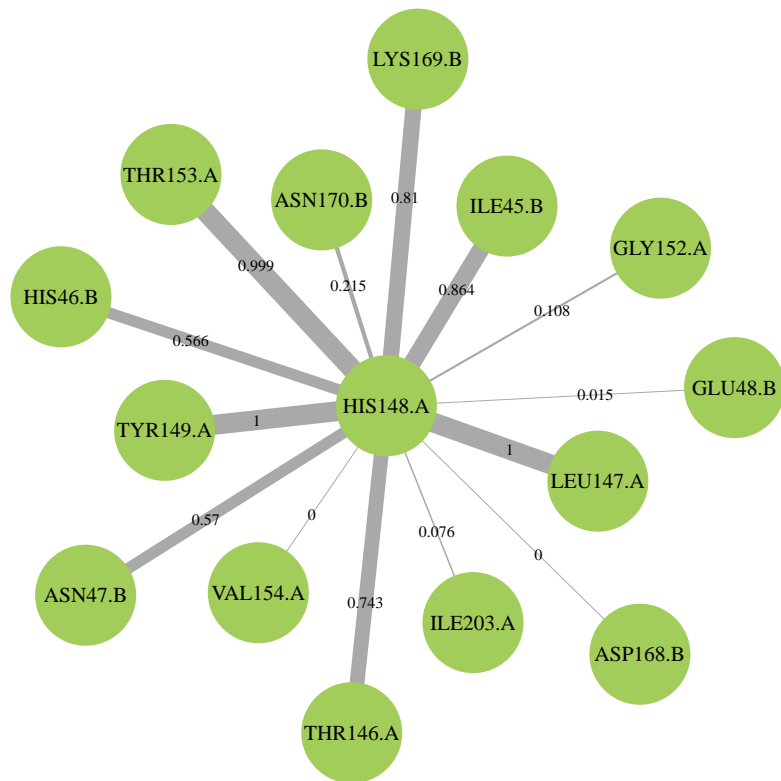

WT  
6.7A contact network

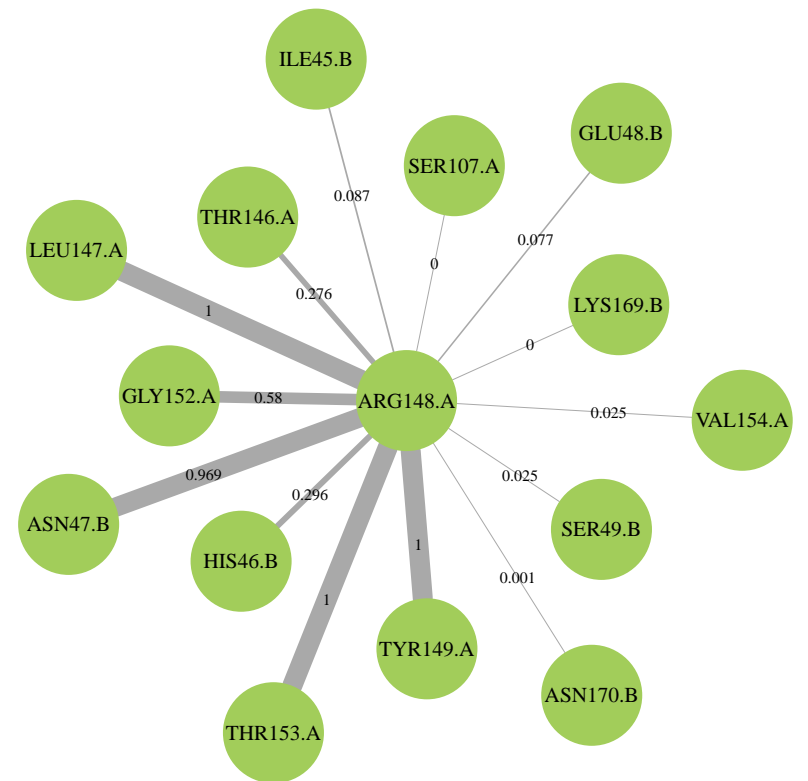



ren\_R148H\_ang\_S49N (Chain B, position 49)  
6.7A contact network

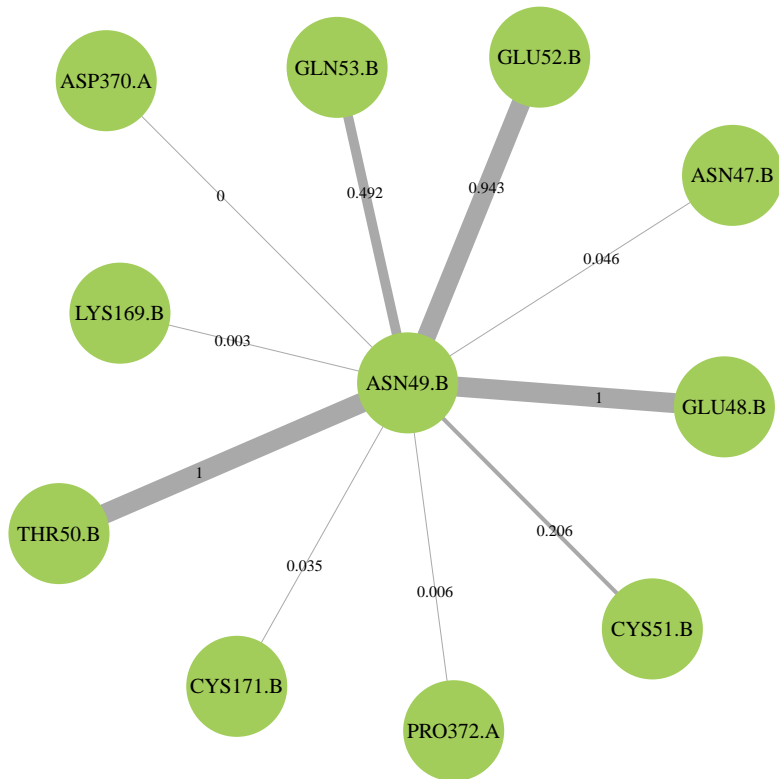

WT  
6.7A contact network

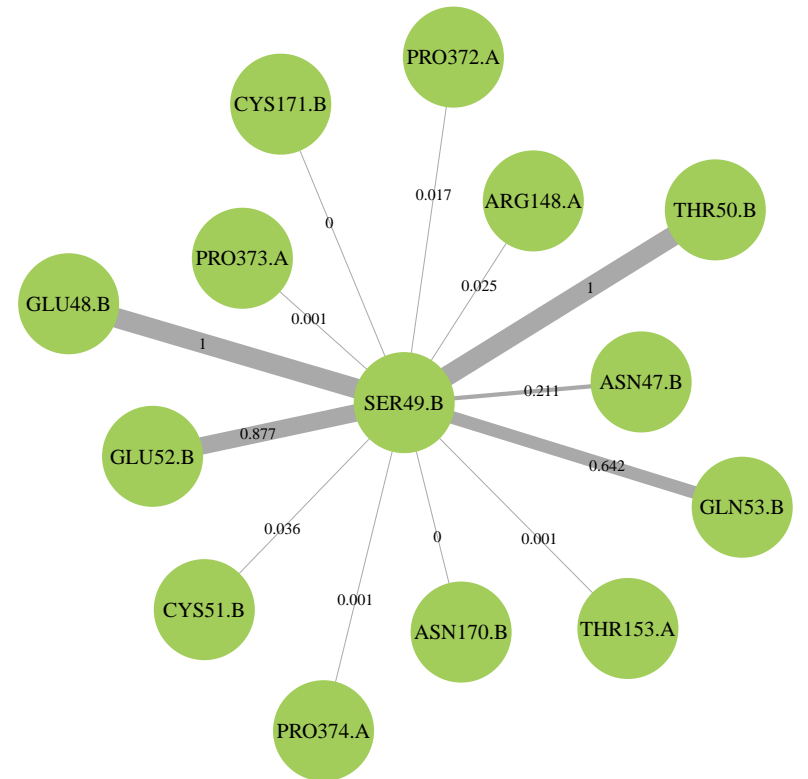

ren\_R148H (Chain A, position 148)  
6.7A contact network

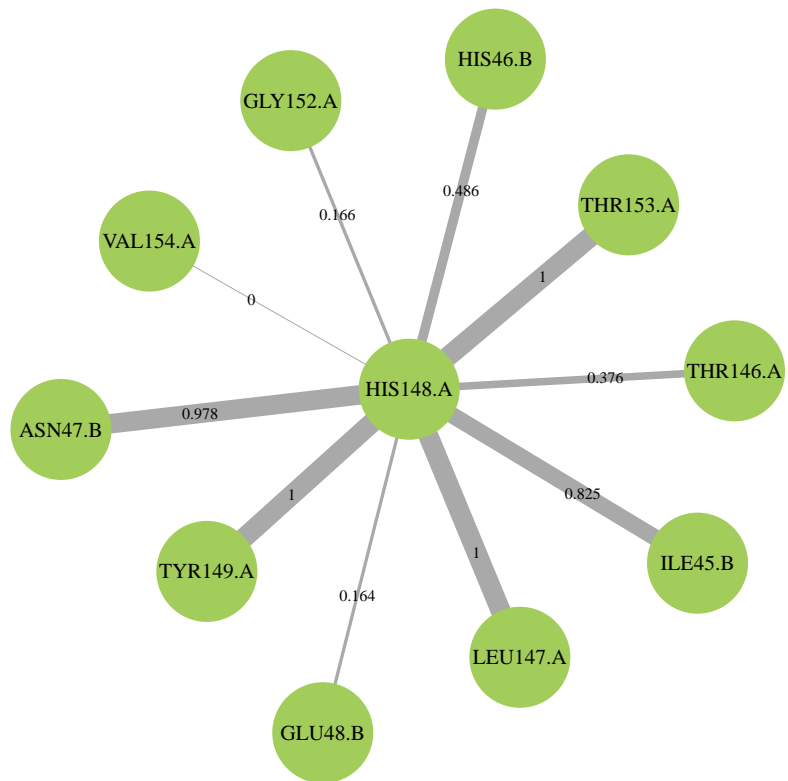

WT  
6.7A contact network

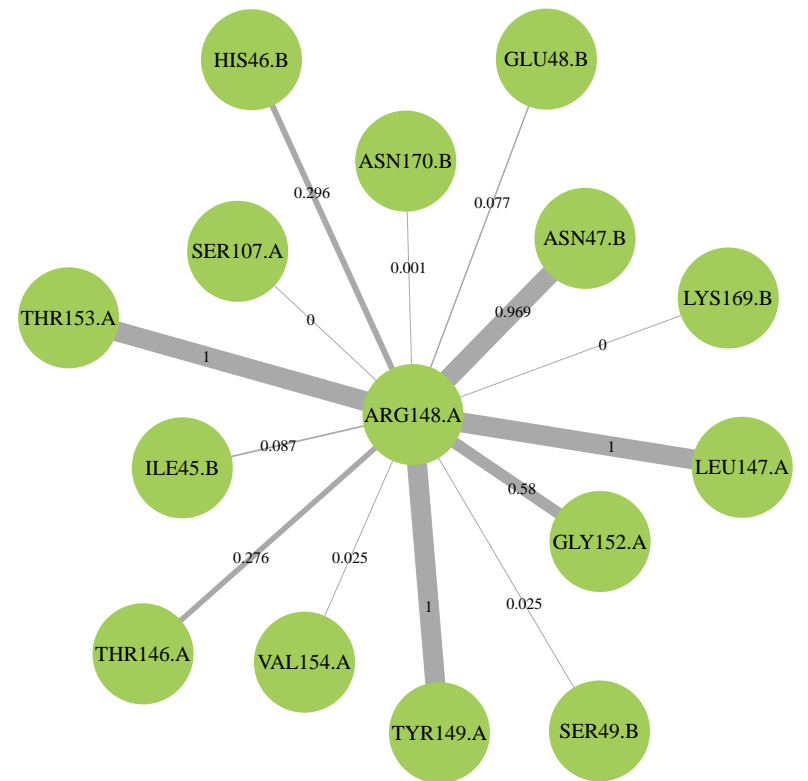

Supplement: NIHMS846845-supplement-7.pdf [file NIHMS846845-supplement-7.pdf]
