# Supplementary material
Source: PubMed Central journal article supplement (PMC5583000)
Supplement: NIHMS846845-supplement-1.pdf [file NIHMS846845-supplement-1.pdf]

All SNPs - Angiotensinogen

| SNP Details |         | Provean | PolyPhen-2        |             | PhD-SNP    |                   | FATHMM     |           | PANTHER-PSEP      |            | HUMA               |
|-------------|---------|---------|-------------------|-------------|------------|-------------------|------------|-----------|-------------------|------------|--------------------|
| SNP         | Seq Pos | Score   | Prediction        | Probability | Prediction | Reliability Index | Prediction | Score     | Preservation Time | Prediction | Associated Disease |
| R4*         | 4       | None    | None              | None        | None       | None              |            |           |                   |            |                    |
| P6R         | 6       | -0.965  | possibly damaging | 0.764       | Neutral    |                   | 8          | DAMAGING  | -1.5              | 176        | probably begin     |
| M10I        | 10      | -2.556  | probably damaging | 0.981       | Disease    |                   | 5          | TOLERATED | -1.41             | 176        | probably begin     |
| M10L        | 10      | -1.948  | possibly damaging | 0.904       | Disease    |                   | 4          | TOLERATED | -1.28             | 176        | probably begin     |
| G14S        | 14      | -2.378  | benign            | 0.001       | Disease    |                   | 4          | TOLERATED | -1.49             | 30         | probably begin     |
| T20P        | 20      | -3.337  | probably damaging | 0.966       | Disease    |                   | 2          | DAMAGING  | -1.55             | 220        | possibly damaging  |
| L22F        | 22      | -2.965  | benign            | 0.125       | Neutral    |                   | 0          | DAMAGING  | -2.06             | 455        | probably damaging  |
| C23S        | 23      | -8.37   | probably damaging | 0.966       | Disease    |                   | 9          | DAMAGING  | -1.53             | 455        | probably damaging  |
| A28P        | 28      | -3.172  | probably damaging | 0.991       | Disease    |                   | 9          | DAMAGING  | -1.58             | 220        | possibly damaging  |
| G29D        | 29      | -3.519  | probably damaging | 0.961       | Disease    |                   | 8          | DAMAGING  | -1.51             | 176        | probably begin     |
| A31G        | 31      | -3.088  | possibly damaging | 0.799       | Disease    |                   | 3          | DAMAGING  | -1.65             | 176        | probably begin     |
| A31T        | 31      | -1.969  | benign            | 0.051       | Disease    |                   | 1          | DAMAGING  | -1.6              | 176        | probably begin     |
| G33S        | 33      | -1.018  | benign            | 0.022       | Disease    |                   | 0          | TOLERATED | -1.45             | 176        | probably begin     |
| R35Q        | 35      | -3.713  | probably damaging | 1           | Disease    |                   | 9          | DAMAGING  | -2.39             | 455        | probably damaging  |
| R35W        | 35      | -7.426  | probably damaging | 1           | Disease    |                   | 9          | DAMAGING  | -2.44             | 455        | probably damaging  |
| H39R        | 39      | -7.426  | probably damaging | 1           | Disease    |                   | 9          | DAMAGING  | -2.31             | 456        | probably damaging  |
| P40L        | 40      | -9.282  | probably damaging | 1           | Disease    |                   | 9          | DAMAGING  | -2.75             | 456        | probably damaging  |
| L43F        | 43      | -3.161  | possibly damaging | 0.927       | Disease    |                   | 6          | DAMAGING  | -2.41             | 220        | possibly damaging  |
| V44I        | 44      | 0.756   | benign            | 0.025       | Neutral    |                   | 4          | DAMAGING  | -2.25             | 91         | probably begin     |
| N47H        | 47      | -2.88   | probably damaging | 0.998       | Disease    |                   | 7          | DAMAGING  | -2.26             | 91         | probably begin     |
| E48K        | 48      | 1.673   | benign            |             | Neutral    |                   | 0          | DAMAGING  | -2.25             | 91         | probably begin     |
| S49N        | 49      | -2.59   | possibly damaging | 0.508       | Disease    |                   | 6          | DAMAGING  | -2.32             | 176        | probably begin     |
| S49G        | 49      | -3.584  | benign            | 0.033       | Disease    |                   | 5          | DAMAGING  | -2.3              | 176        | probably begin     |
| C51R        | 51      | -11.004 | probably damaging | 1           | Disease    |                   | 10         | DAMAGING  | -2.31             | 456        | probably damaging  |
| K56M        | 56      | -3.568  | probably damaging | 0.964       | Neutral    |                   | 4          | DAMAGING  | -2.28             | 91         | probably begin     |
| A59T        | 59      | -1.636  | benign            | 0.003       | Neutral    |                   | 3          | DAMAGING  | -2.31             | 91         | probably begin     |
| G60R        | 60      | 0.162   | possibly damaging | 0.779       | Neutral    |                   | 1          | DAMAGING  | -2.25             | 91         | probably begin     |
| K61N        | 61      | -0.375  | benign            | 0.045       | Neutral    |                   | 1          | DAMAGING  | -2.28             | 91         | probably begin     |
| K63E        | 63      | -0.431  | benign            | 0           | Neutral    |                   | 3          | DAMAGING  | -2.25             | 176        | probably begin     |
| D64Y        | 64      | -4.884  | probably damaging | 0.982       | Disease    |                   | 8          | DAMAGING  | -2.39             | 91         | probably begin     |
| F67L        | 67      | -4.602  | benign            | 0.201       | Disease    |                   | 3          | DAMAGING  | -2.18             | 361        | possibly damaging  |
| P69L        | 69      | -9.292  | probably damaging | 1           | Disease    |                   | 1          | DAMAGING  | -2.19             | 456        | probably damaging  |
| A70T        | 70      | -0.801  | benign            | 0.008       | Neutral    |                   | 1          | DAMAGING  | -2.25             | 30         | probably begin     |
| P71L        | 71      | -7.54   | benign            | 0.008       | Neutral    |                   | 3          | DAMAGING  | -2.31             | 324        | possibly damaging  |
| Q73*        | 73      | None    | None              | None        | None       | None              |            |           |                   |            |                    |
| A74V        | 74      | -3.233  | possibly damaging | 0.603       | Neutral    |                   | 0          | DAMAGING  | -1.55             | 220        | possibly damaging  |
| A74P        | 74      | -3.948  | probably damaging | 0.988       | Disease    |                   | 8          | DAMAGING  | -1.63             | 220        | possibly damaging  |
| T76A        | 76      | -2.785  | benign            | 0.061       | Disease    |                   | 4          | DAMAGING  | -1.53             | 324        | possibly damaging  |
| S77F        | 77      | -4.006  | benign            | 0.239       | Disease    |                   | 5          | DAMAGING  | -1.6              | 220        | possibly damaging  |
| P78S        | 78      | -6.23   | possibly damaging | 0.641       | Disease    |                   | 4          | DAMAGING  | -1.55             | 455        | probably damaging  |
| D80E        | 80      | -2.735  | benign            | 0.069       | Neutral    |                   | 1          | DAMAGING  | -1.51             | 324        | possibly damaging  |
| A83V        | 83      | -2.927  | possibly damaging | 0.895       | Neutral    |                   | 5          | DAMAGING  | -1.56             | 220        | possibly damaging  |
| A83P        | 83      | -3.395  | probably damaging | 0.989       | Disease    |                   | 5          | DAMAGING  | -1.58             | 220        | possibly damaging  |
| L84P        | 84      | -5.234  | probably damaging | 0.963       | Disease    |                   | 8          | DAMAGING  | -1.66             | 176        | probably begin     |
| Q85R        | 85      | 0.776   | benign            | 0           | Neutral    |                   | 9          | TOLERATED | -1.45             | 91         | probably begin     |
| Q85*        | 85      | None    | None              | None        | None       | None              |            |           |                   |            |                    |
| Q87H        | 87      | -3.493  | possibly damaging | 0.911       | Neutral    |                   | 6          | DAMAGING  | -1.54             | 176        | probably begin     |
| V89L        | 89      | -1.868  | benign            | 0.088       | Neutral    |                   | 5          | DAMAGING  | -1.5              | 176        | probably begin     |
| T97A        | 97      | 0.586   | benign            | 0           | Neutral    |                   | 0          | DAMAGING  | -2.21             | 91         | probably begin     |
| E98K        | 98      | -2.512  | possibly damaging | 0.685       | Neutral    |                   | 5          | DAMAGING  | -2.25             | 220        | possibly damaging  |
| K100E       | 100     | -1.975  | possibly damaging | 0.55        | Disease    |                   | 1          | DAMAGING  | -2.28             | 91         | probably begin     |
| R102K       | 102     | -1.893  | possibly damaging | 0.944       | Neutral    |                   | 5          | DAMAGING  | -2.32             | 324        | possibly damaging  |
| A103V       | 103     | -1.93   | benign            | 0.401       | Neutral    |                   | 3          | DAMAGING  | -2.23             | 220        | possibly damaging  |
| A104T       | 104     | -0.858  | benign            | 0.336       | Neutral    |                   | 5          | DAMAGING  | -2.3              | 176        | probably begin     |
| M105V       | 105     | -0.633  | benign            | 0.006       | Neutral    |                   | 9          | DAMAGING  | -2.19             | 91         | probably begin     |
| V106A       | 106     | -3.466  | probably damaging | 0.995       | Disease    |                   | 3          | DAMAGING  | -2.3              | 220        | possibly damaging  |
| G107R       | 107     | -4.75   | probably damaging | 0.969       | Disease    |                   | 4          | DAMAGING  | -2.27             | 91         | probably begin     |
| A110V       | 110     | 0.921   | benign            | 0.015       | Neutral    |                   | 3          | DAMAGING  | -2.22             | 91         | probably begin     |
| G114C       | 114     | -8.588  | probably damaging | 1           | Disease    |                   | 9          | DAMAGING  | -1.93             | 456        | probably damaging  |
| R116C       | 116     | -6.801  | probably damaging | 1           | Disease    |                   | 9          | DAMAGING  | -1.98             | 455        | probably damaging  |
| I117R       | 117     | -2.834  | probably damaging | 0.997       | Disease    |                   | 6          | DAMAGING  | -1.98             | 91         | probably begin     |
| M120L       | 120     | -0.667  | benign            | 0.002       | Neutral    |                   | 1          | DAMAGING  | -1.79             | 176        | probably begin     |
| S122N       | 122     | -1.23   | benign            | 0.03        | Disease    |                   | 5          | DAMAGING  | -1.95             | 176        | probably begin     |
| E123K       | 123     | -2.508  | possibly damaging | 0.587       | Disease    |                   | 7          | DAMAGING  | -1.77             | 176        | probably begin     |
| V127M       | 127     | -0.791  | benign            | 0.116       | Neutral    |                   | 5          | DAMAGING  | -2.29             | 176        | probably begin     |
| V128I       | 128     | -0.606  | benign            | 0.03        | Neutral    |                   | 7          | DAMAGING  | -1.82             | 91         | probably begin     |
| H129R       | 129     | 0.244   | benign            | 0.002       | Neutral    |                   | 5          | DAMAGING  | -2.22             | 91         | probably begin     |
| A131T       | 131     | -1.793  | benign            | 0.359       | Neutral    |                   | 3          | DAMAGING  | -1.73             | 176        | probably begin     |
| V133I       | 133     | -0.095  | benign            | 0.002       | Neutral    |                   | 7          | DAMAGING  | -1.84             | 30         | probably begin     |
| L134F       | 134     | -2.607  | possibly damaging | 0.828       | Neutral    |                   | 9          | DAMAGING  | -1.58             | 324        | possibly damaging  |
| T137A       | 137     | -2.458  | benign            | 0.009       | Neutral    |                   | 4          | DAMAGING  | -1.75             | 176        | probably begin     |
| T137M       | 137     | -2.996  | possibly damaging | 0.62        | Neutral    |                   | 0          | DAMAGING  | -1.79             | 176        | probably begin     |
| A138S       | 138     | -1.246  | benign            | 0.009       | Neutral    |                   | 9          | DAMAGING  | -1.64             | 91         | probably begin     |
| V139L       | 139     | 1.661   | benign            | 0.001       | Disease    |                   | 2          | DAMAGING  | -2.29             | 6          | probably begin     |
| T142A       | 142     | -3.762  | possibly damaging | 0.848       | Neutral    |                   | 9          | TOLERATED | -1.37             | 176        | probably begin     |
| T142S       | 142     | -2.382  | benign            | 0.307       | Neutral    |                   | 6          | DAMAGING  | -1.79             | 176        | probably begin     |
| A144T       | 144     | -1.372  | benign            | 0.403       | Disease    |                   | 7          | DAMAGING  | -2.02             | 324        | possibly damaging  |
| Y147C       | 147     | -8.465  | probably damaging | 1           | Disease    |                   | 4          | DAMAGING  | -2.43             | 455        | probably damaging  |
| A150T       | 150     | -3.575  | probably damaging | 1           | Disease    |                   | 8          | DAMAGING  | -2.83             | 456        | probably damaging  |
| T154I       | 154     | -5.764  | probably damaging | 1           | Disease    |                   | 7          | DAMAGING  | -3.03             | 456        | probably damaging  |
| A155V       | 155     | -3.743  | probably damaging | 1           | Disease    |                   | 3          | DAMAGING  | -2                | 361        | possibly damaging  |
| D156G       | 156     | 0.097   | benign            | 0           | Neutral    |                   | 3          | DAMAGING  | -1.9              | 91         | probably begin     |
| I161V       | 161     | -0.944  | benign            | 0.021       | Neutral    |                   | 8          | DAMAGING  | -1.51             | 91         | probably begin     |
| V164I       | 164     | -0.538  | possibly damaging | 0.949       | Neutral    |                   | 4          | DAMAGING  | -1.83             | 220        | possibly damaging  |
| D168Y       | 168     | -6.603  | probably damaging | 1           | Disease    |                   | 3          | DAMAGING  | -1.96             | 361        | possibly damaging  |
| D168E       | 168     | -2.699  | benign            | 0.135       | Neutral    |                   | 4          | DAMAGING  | -1.84             | 361        | possibly damaging  |
| S173Y       | 173     | -5.294  | probably damaging | 1           | Disease    |                   | 2          | DAMAGING  | -2.47             | 455        | probably damaging  |

| SNP Details |         | Provean | PolyPhen-2        |             | PhD-SNP    |                   | FATHMM     |           | PANTHER-PSEP      |            | HUMA                     |                   |
|-------------|---------|---------|-------------------|-------------|------------|-------------------|------------|-----------|-------------------|------------|--------------------------|-------------------|
| SNP         | Seq Pos | Score   | Prediction        | Probability | Prediction | Reliability Index | Prediction | Score     | Preservation Time | Prediction | Associated Disease       |                   |
| R174W       | 174     | -6,314  | probably damaging | 1           | Disease    |                   | 3          | DAMAGING  | -1,89             | 324        | possibly damaging        |                   |
| H178Y       | 178     | -4,388  | probably damaging | 0,998       | Disease    |                   | 5          | DAMAGING  | -2,53             | 456        | probably damaging        |                   |
| K179R       | 179     | -2,405  | probably damaging | 1           | Neutral    |                   | 2          | DAMAGING  | -1,89             | 455        | probably damaging        |                   |
| Q185*       | 185     | None    | None              | None        | None       | None              |            |           |                   |            |                          |                   |
| A186V       | 186     | -1,601  | probably damaging | 0,975       | Neutral    |                   | 3          | DAMAGING  | -2,37             | 91         | probably begin           |                   |
| Q188L       | 188     | -5,446  | probably damaging | 0,999       | Neutral    |                   | 1          | DAMAGING  | -1,84             | 176        | probably begin           |                   |
| Q200*       | 200     | None    | None              | None        | None       | None              |            |           |                   |            |                          |                   |
| A201T       | 201     | -1,136  | benign            |             | 0          | Neutral           |            | 3         | DAMAGING          | -2,25      | 30                       | probably begin    |
| Q202*       | 202     | None    | None              | None        | None       | None              |            |           |                   |            | RENAL TUBULAR DYSGENESIS |                   |
| S206F       | 206     | -4,754  | probably damaging | 1           | Disease    |                   | 5          | DAMAGING  | -1,97             | 176        | probably begin           |                   |
| T207M       | 207     | -4,051  | probably damaging | 1           | Neutral    |                   | 0          | DAMAGING  | -1,82             | 220        | possibly damaging        |                   |
| V208A       | 208     | -2,325  | probably damaging | 0,965       | Neutral    |                   | 4          | TOLERATED | -1,41             | 176        | probably begin           |                   |
| V209A       | 209     | -2,625  | possibly damaging | 0,873       | Neutral    |                   | 3          | DAMAGING  | -1,76             | 220        | possibly damaging        |                   |
| V211M       | 211     | 0,846   | benign            |             | 0,294      | Disease           |            | 3         | DAMAGING          | -1,96      | 30                       | probably begin    |
| A214T       | 214     | -2,863  | probably damaging | 0,999       | Neutral    |                   | 3          | DAMAGING  | -2,29             | 176        | probably begin           |                   |
| P215L       | 215     | -8,911  | probably damaging | 1           | Neutral    |                   | 0          | DAMAGING  | -2,32             | 361        | possibly damaging        |                   |
| H218Q       | 218     | -0,117  | possibly damaging |             | 0,526      | Disease           |            | 2         | DAMAGING          | -1,75      | 91                       | probably begin    |
| L219Q       | 219     | -5,367  | probably damaging | 1           | Disease    |                   | 5          | DAMAGING  | -2,16             | 456        | probably damaging        |                   |
| Q225P       | 225     | -3,837  | possibly damaging | 0,905       | Disease    |                   | 3          | DAMAGING  | -2,33             | 176        | probably begin           |                   |
| A228D       | 228     | -3,405  | probably damaging | 0,986       | Neutral    |                   | 1          | DAMAGING  | -1,87             | 176        | probably begin           |                   |
| T231N       | 231     | -2,045  | benign            |             | 0,289      | Neutral           |            | 5         | DAMAGING          | -1,84      | 30                       | probably begin    |
| T231A       | 231     | 2,233   | benign            |             | 0          | Neutral           |            | 8         | DAMAGING          | -1,8       | 30                       | probably begin    |
| P232L       | 232     | -5,856  | probably damaging | 0,993       | Disease    |                   | 5          | DAMAGING  | -2,28             | 176        | probably begin           |                   |
| L235F       | 235     | -0,222  | benign            |             | 0,013      | Neutral           |            | 9         | TOLERATED         | -1,48      | 91                       | probably begin    |
| R237C       | 237     | -6,783  | probably damaging | 1           | Disease    |                   | 5          | DAMAGING  | -1,93             | 455        | probably damaging        |                   |
| T242I       | 242     | -4,38   | possibly damaging |             | 0,884      | Disease           |            | 3         | DAMAGING          | -1,91      | 324                      | possibly damaging |
| L244R       | 244     | 0,638   | possibly damaging |             | 0,582      | Disease           |            | 6         | DAMAGING          | -1,77      | 91                       | probably begin    |
| A248V       | 248     | -3,115  | probably damaging | 0,985       | Disease    |                   | 2          | DAMAGING  | -1,87             | 324        | possibly damaging        |                   |
| R253M       | 253     | -3,133  | benign            |             | 0,089      | Neutral           |            | 1         | DAMAGING          | -2,37      | 220                      | possibly damaging |
| M255I       | 255     | -0,314  | benign            |             | 0,002      | Disease           |            | 2         | DAMAGING          | -2,04      | 91                       | probably begin    |
| Q256*       | 256     | None    | None              | None        | None       | None              |            |           |                   |            |                          |                   |
| A257V       | 257     | -3,52   | probably damaging | 0,995       | Disease    |                   | 1          | DAMAGING  | -1,87             | 324        | possibly damaging        |                   |
| V258M       | 258     | -1,796  | probably damaging | 0,999       | Disease    |                   | 1          | DAMAGING  | -1,83             | 220        | possibly damaging        |                   |
| W261R       | 261     | -9,099  | probably damaging | 0,999       | Disease    |                   | 5          | DAMAGING  | -2,21             | 324        | possibly damaging        |                   |
| K262R       | 262     | -1,269  | benign            |             | 0,002      | Disease           |            | 3         | DAMAGING          | -2,07      | 220                      | possibly damaging |
| T263I       | 263     | -0,028  | benign            |             | 0          | Neutral           |            | 7         | TOLERATED         | -0,63      | 30                       | probably begin    |
| G264S       | 264     | 0,073   | benign            |             | 0          | Disease           |            | 1         | DAMAGING          | -1,8       | 30                       | probably begin    |
| C265W       | 265     | -1,657  | benign            |             | 0,015      | Neutral           |            | 0         | DAMAGING          | -2,25      | 30                       | probably begin    |
| S266F       | 266     | -1,78   | benign            |             | 0,413      | Disease           |            | 5         | DAMAGING          | -1,77      | 30                       | probably begin    |
| M268I       | 268     | -0,292  | benign            |             | 0          | Neutral           |            | 0         | DAMAGING          | -2,25      | 6                        | probably begin    |
| M268T       | 268     | 2,072   | benign            |             | 0          | Neutral           |            | 4         | DAMAGING          | -2,16      | 6                        | probably begin    |
| G269E       | 269     | -2,237  | benign            |             | 0,044      | Disease           |            | 6         | DAMAGING          | -2,27      | 176                      | probably begin    |
| A270T       | 270     | -0,584  | possibly damaging |             | 0,477      | Neutral           |            | 1         | DAMAGING          | -1,82      | 91                       | probably begin    |
| D273G       | 273     | -3,428  | benign            |             | 0,012      | Disease           |            | 4         | DAMAGING          | -2,45      | 220                      | possibly damaging |
| A277S       | 277     | -1,004  | benign            |             | 0,002      | Disease           |            | 6         | DAMAGING          | -1,92      | 30                       | probably begin    |
| T280S       | 280     | -2,214  | benign            |             | 0,163      | Neutral           |            | 2         | DAMAGING          | -1,7       | 324                      | possibly damaging |
| T280A       | 280     | -2,249  | benign            |             | 0,017      | Neutral           |            | 0         | DAMAGING          | -1,81      | 324                      | possibly damaging |
| Y281N       | 281     | -4,826  | probably damaging | 1           | Disease    |                   | 7          | DAMAGING  | -1,86             | 455        | probably damaging        |                   |
| Y281C       | 281     | -5,582  | probably damaging | 1           | Disease    |                   | 6          | DAMAGING  | -1,88             | 455        | probably damaging        |                   |
| V282I       | 282     | -0,617  | possibly damaging |             | 0,824      | Neutral           |            | 9         | DAMAGING          | -1,78      | 176                      | probably begin    |
| H283L       | 283     | -7,694  | probably damaging | 0,998       | Disease    |                   | 8          | DAMAGING  | -1,77             | 176        | probably begin           |                   |
| L293P       | 293     | -3,363  | benign            |             | 0,068      | Disease           |            | 6         | DAMAGING          | -2,21      | 91                       | probably begin    |
| A295S       | 295     | -0,927  | benign            |             | 0,012      | Disease           |            | 1         | DAMAGING          | -2,16      | 91                       | probably begin    |
| E296K       | 296     | -2,162  | probably damaging | 0,961       | Disease    |                   | 6          | DAMAGING  | -1,77             | 91         | probably begin           |                   |
| P297L       | 297     | -4,815  | benign            |             | 0,06       | Disease           |            | 1         | DAMAGING          | -1,8       | 91                       | probably begin    |
| E299K       | 299     | -2,693  | benign            |             | 0,058      | Disease           |            | 6         | DAMAGING          | -1,81      | 176                      | probably begin    |
| W301*       | 301     | None    | None              | None        | None       | None              |            |           |                   |            |                          |                   |
| D303N       | 303     | -3,458  | benign            |             | 0,163      | Disease           |            | 7         | DAMAGING          | -2,27      | 176                      | probably begin    |
| S305N       | 305     | -1,213  | benign            |             | 0,001      | Neutral           |            | 7         | DAMAGING          | -1,78      | 91                       | probably begin    |
| S307L       | 307     | -3,772  | possibly damaging | 0,795       | Disease    |                   | 3          | DAMAGING  | -1,94             | 176        | probably begin           |                   |
| V310L       | 310     | -2,685  | probably damaging | 0,994       | Disease    |                   | 7          | DAMAGING  | -3,1              | 361        | possibly damaging        |                   |
| F319L       | 319     | -5,322  | probably damaging | 1           | Neutral    |                   | 2          | DAMAGING  | -1,91             | 361        | possibly damaging        |                   |
| W322R       | 322     | -7,61   | benign            |             | 0,035      | Disease           |            | 4         | DAMAGING          | -2,23      | 220                      | possibly damaging |
| S323N       | 323     | -0,47   | benign            |             | 0,001      | Neutral           |            | 4         | DAMAGING          | -1,8       | 176                      | probably begin    |
| Q326R       | 326     | -1,385  | benign            |             | 0,001      | Neutral           |            | 1         | DAMAGING          | -2,32      | 176                      | probably begin    |
| D327H       | 327     | -0,38   | possibly damaging |             | 0,779      | Disease           |            | 5         | DAMAGING          | -2,27      | 91                       | probably begin    |
| P335S       | 335     | -7,108  | probably damaging | 1           | Disease    |                   | 4          | DAMAGING  | -2,42             | 456        | probably damaging        |                   |
| T337I       | 337     | -2,647  | possibly damaging | 0,766       | Neutral    |                   | 0          | DAMAGING  | -1,86             | 91         | probably begin           |                   |
| S339N       | 339     | 1,234   | benign            |             | 0,001      | Neutral           |            | 5         | DAMAGING          | -2,08      | 91                       | probably begin    |
| I345S       | 345     | -4,944  | probably damaging | 0,998       | Disease    |                   | 6          | DAMAGING  | -2,58             | 176        | probably begin           |                   |
| Q346H       | 346     | -4,211  | probably damaging | 0,998       | Disease    |                   | 8          | DAMAGING  | -1,84             | 176        | probably begin           |                   |
| P347L       | 347     | -8,81   | probably damaging | 1           | Disease    |                   | 7          | DAMAGING  | -4,87             | 456        | probably damaging        |                   |
| H348Y       | 348     | -2,629  | possibly damaging |             | 0,846      | Disease           |            | 4         | DAMAGING          | -1,82      | 176                      | probably begin    |
| D352N       | 352     | -3,316  | benign            |             | 0,038      | Disease           |            | 1         | DAMAGING          | -2,27      | 220                      | possibly damaging |
| L353V       | 353     | -2,535  | probably damaging | 0,999       | Disease    |                   | 7          | DAMAGING  | -2,24             | 456        | probably damaging        |                   |
| K355*       | 355     | None    | None              | None        | None       | None              |            |           |                   |            |                          |                   |
| G358D       | 358     | -0,816  | benign            |             | 0,043      | Neutral           |            | 0         | DAMAGING          | -2,17      | 91                       | probably begin    |
| Q363*       | 363     | None    | None              | None        | None       | None              |            |           |                   |            |                          |                   |
| W368*       | 368     | None    | None              | None        | None       | None              |            |           |                   |            |                          |                   |
| M369K       | 369     | -2,91   | benign            |             | 0,005      | Disease           |            | 6         | DAMAGING          | -1,79      | 176                      | probably begin    |
| P374T       | 374     | -6,317  | probably damaging | 0,967       | Neutral    |                   | 9          | DAMAGING  | -1,79             | 324        | possibly damaging        |                   |
| R375Q       | 375     | -3,573  | probably damaging | 1           | Disease    |                   | 2          | DAMAGING  | -1,81             | 455        | probably damaging        |                   |
| R375W       | 375     | -7,016  | probably damaging | 1           | Disease    |                   | 6          | DAMAGING  | -1,92             | 455        | probably damaging        |                   |
| M381R       | 381     | -4,232  | probably damaging | 0,997       | Disease    |                   | 4          | DAMAGING  | -2,37             | 91         | probably begin           |                   |
| M381L       | 381     | -0,23   | benign            |             | 0          | Neutral           |            | 7         | TOLERATED         | -1,36      | 91                       | probably begin    |
| P382A       | 382     | -7,016  | probably damaging | 1           | Disease    |                   | 5          | DAMAGING  | -5,12             | 456        | probably damaging        |                   |
| L384M       | 384     | -1,719  | probably damaging | 0,986       | Neutral    |                   | 1          | DAMAGING  | -1,88             | 220        | possibly damaging        |                   |

All SNPs - Angiotensinogen

| SNP Details |         | Provean | PolyPhen-2        |             | PhD-SNP    |                   | FATHMM     |                | PANTHER-PSEP      |                   | HUMA               |
|-------------|---------|---------|-------------------|-------------|------------|-------------------|------------|----------------|-------------------|-------------------|--------------------|
| SNP         | Seq Pos | Score   | Prediction        | Probability | Prediction | Reliability Index | Prediction | Score          | Preservation Time | Prediction        | Associated Disease |
| V385L       | 385     | -0,524  | benign            | 0           | Neutral    |                   | 1          | DAMAGING -1,81 | 91                | probably benign   |                    |
| V385A       | 385     | -0,241  | benign            | 0,001       | Neutral    |                   | 7          | DAMAGING -1,76 | 91                | probably benign   |                    |
| L392M       | 392     | -1,59   | probably damaging | 1           | Disease    |                   | 1          | DAMAGING -2,5  | 176               | probably benign   |                    |
| D394E       | 394     | -1,292  | benign            | 0,013       | Neutral    |                   | 8          | DAMAGING -2,23 | 176               | probably benign   |                    |
| L395V       | 395     | -2,566  | probably damaging | 0,985       | Neutral    |                   | 1          | DAMAGING -1,67 | 324               | possibly damaging |                    |
| Q398*       | 398     | None    | None              | None        | None       | None              |            |                |                   |                   |                    |
| A403T       | 403     | 1,626   | benign            | 0,001       | Neutral    |                   | 3          | DAMAGING -2,24 | 91                | probably benign   |                    |
| H406Y       | 406     | -1,399  | possibly damaging | 0,631       | Neutral    |                   | 2          | DAMAGING -2,27 | 30                | probably benign   |                    |
| L409P       | 409     | -0,418  | possibly damaging | 0,648       | Disease    |                   | 9          | DAMAGING -2,27 | 91                | probably benign   |                    |
| Q412K       | 412     | -0,27   | benign            | 0,032       | Disease    |                   | 9          | DAMAGING -2,2  | 91                | probably benign   |                    |
| L414V       | 414     | 0,568   | benign            | 0,035       | Disease    |                   | 5          | DAMAGING -1,94 | 91                | probably benign   |                    |
| S415T       | 415     | -2,61   | probably damaging | 0,995       | Neutral    |                   | 6          | DAMAGING -1,93 | 455               | probably damaging |                    |
| S415G       | 415     | -2,883  | possibly damaging | 0,754       | Neutral    |                   | 5          | DAMAGING -2,07 | 455               | probably damaging |                    |
| R418C       | 418     | -2,713  | benign            | 0,297       | Disease    |                   | 1          | DAMAGING -2,32 | 30                | probably benign   |                    |
| R418H       | 418     | -0,066  | benign            | 0           | Disease    |                   | 4          | DAMAGING -2,3  | 30                | probably benign   |                    |
| V421A       | 421     | -3,238  | probably damaging | 0,998       | Disease    |                   | 6          | DAMAGING -2,21 | 324               | possibly damaging |                    |
| V421M       | 421     | -2,206  | probably damaging | 1           | Disease    |                   | 8          | DAMAGING -2,26 | 324               | possibly damaging |                    |
| E423Q       | 423     | -0,202  | benign            | 0,017       | Neutral    |                   | 6          | DAMAGING -2,34 | 30                | probably benign   |                    |
| V424M       | 424     | -2,598  | probably damaging | 1           | Disease    |                   | 6          | DAMAGING -2,2  | 324               | possibly damaging |                    |
| L425P       | 425     | -5,273  | probably damaging | 1           | Disease    |                   | 8          | DAMAGING -2,09 | 176               | probably benign   |                    |
| F430L       | 430     | -4,783  | benign            | 0,432       | Neutral    |                   | 6          | DAMAGING -1,72 | 455               | probably damaging |                    |
| E431*       | 431     | None    | None              | None        | None       | None              |            |                |                   |                   |                    |
| E441D       | 441     | -1,108  | benign            | 0,005       | Neutral    |                   | 7          | DAMAGING -2,26 | 176               | probably benign   |                    |
| S442F       | 442     | -3,718  | probably damaging | 0,996       | Disease    |                   | 4          | DAMAGING -1,91 | 176               | probably benign   |                    |
| N447S       | 447     | -0,049  | benign            | 0,001       | Neutral    |                   | 9          | DAMAGING -1,78 | 91                | probably benign   |                    |
| N447K       | 447     | -0,878  | benign            | 0           | Neutral    |                   | 4          | DAMAGING -1,74 | 91                | probably benign   |                    |
| E450A       | 450     | -2,514  | possibly damaging | 0,549       | Neutral    |                   | 7          | DAMAGING -1,87 | 176               | probably benign   |                    |
| R458C       | 458     | -2,962  | probably damaging | 0,996       | Disease    |                   | 9          | DAMAGING -2,73 | 91                | probably benign   |                    |
| R458H       | 458     | -1,161  | benign            | 0,004       | Disease    |                   | 7          | DAMAGING -2,4  | 91                | probably benign   |                    |
| L461V       | 461     | -2,617  | probably damaging | 0,999       | Disease    |                   | 8          | DAMAGING -2,11 | 361               | possibly damaging |                    |
| A463V       | 463     | -3,032  | possibly damaging | 0,926       | Neutral    |                   | 0          | DAMAGING -1,72 | 176               | probably benign   |                    |
| V464M       | 464     | -2,036  | probably damaging | 1           | Neutral    |                   | 0          | DAMAGING -2,52 | 91                | probably benign   |                    |
| A469D       | 469     | -2,228  | possibly damaging | 0,927       | Disease    |                   | 8          | DAMAGING -1,85 | 91                | probably benign   |                    |
| A471V       | 471     | -2,862  | probably damaging | 0,975       | Disease    |                   | 6          | DAMAGING -1,83 | 176               | probably benign   |                    |
| H473N       | 473     | -4,22   | possibly damaging | 0,722       | Disease    |                   | 6          | DAMAGING -1,81 | 176               | probably benign   |                    |
| R477H       | 477     | -4,037  | probably damaging | 1           | Disease    |                   | 9          | DAMAGING -2,02 | 455               | probably damaging |                    |
| T484I       | 484     | -0,894  | benign            | 0           | Neutral    |                   | 1          | DAMAGING -1,7  | 30                | probably benign   |                    |

| SNP Details |         | Provean | PolyPhen-2        |             | PhD-SNP    |                   | FATHMM     |          | PANTHER-PSEP      |            | HUMA                     |                          |
|-------------|---------|---------|-------------------|-------------|------------|-------------------|------------|----------|-------------------|------------|--------------------------|--------------------------|
| SNP         | Seq Pos | Score   | Prediction        | Probability | Prediction | Reliability Index | Prediction | Score    | Preservation Time | Prediction | Associated Disease       |                          |
| T20P        | 20      | -3,337  | probably damaging | 0,966       | Disease    |                   | 2          | DAMAGING | -1,55             | 220        | possibly damaging        |                          |
| C23S        | 23      | -8,37   | probably damaging | 0,966       | Disease    |                   | 9          | DAMAGING | -1,53             | 455        | probably damaging        |                          |
| A28P        | 28      | -3,172  | probably damaging | 0,991       | Disease    |                   | 9          | DAMAGING | -1,58             | 220        | possibly damaging        |                          |
| G29D        | 29      | -3,519  | probably damaging | 0,961       | Disease    |                   | 8          | DAMAGING | -1,51             | 176        | probably begin           |                          |
| A31G        | 31      | -3,088  | possibly damaging | 0,799       | Disease    |                   | 3          | DAMAGING | -1,65             | 176        | probably begin           |                          |
| R35Q        | 35      | -3,713  | probably damaging | 1           | Disease    |                   | 9          | DAMAGING | -2,39             | 455        | probably damaging        |                          |
| R35W        | 35      | -7,426  | probably damaging | 1           | Disease    |                   | 9          | DAMAGING | -2,44             | 455        | probably damaging        |                          |
| H39R        | 39      | -7,426  | probably damaging | 1           | Disease    |                   | 9          | DAMAGING | -2,31             | 456        | probably damaging        |                          |
| P40L        | 40      | -9,282  | probably damaging | 1           | Disease    |                   | 9          | DAMAGING | -2,75             | 456        | probably damaging        |                          |
| L43F        | 43      | -3,161  | possibly damaging | 0,927       | Disease    |                   | 6          | DAMAGING | -2,41             | 220        | possibly damaging        |                          |
| N47H        | 47      | -2,88   | probably damaging | 0,998       | Disease    |                   | 7          | DAMAGING | -2,26             | 91         | probably begin           |                          |
| S49N        | 49      | -2,59   | possibly damaging | 0,508       | Disease    |                   | 6          | DAMAGING | -2,32             | 176        | probably begin           |                          |
| C51R        | 51      | -11,004 | probably damaging | 1           | Disease    |                   | 10         | DAMAGING | -2,31             | 456        | probably damaging        |                          |
| D64Y        | 64      | -4,884  | probably damaging | 0,982       | Disease    |                   | 8          | DAMAGING | -2,39             | 91         | probably begin           |                          |
| F67L        | 67      | -4,602  | benign            | 0,201       | Disease    |                   | 3          | DAMAGING | -2,18             | 361        | possibly damaging        |                          |
| P69L        | 69      | -9,292  | probably damaging | 1           | Disease    |                   | 1          | DAMAGING | -2,19             | 456        | probably damaging        |                          |
| A74V        | 74      | -3,233  | possibly damaging | 0,603       | Neutral    |                   | 0          | DAMAGING | -1,55             | 220        | possibly damaging        |                          |
| A74P        | 74      | -3,948  | probably damaging | 0,988       | Disease    |                   | 8          | DAMAGING | -1,63             | 220        | possibly damaging        |                          |
| T76A        | 76      | -2,785  | benign            | 0,061       | Disease    |                   | 4          | DAMAGING | -1,53             | 324        | possibly damaging        |                          |
| S77F        | 77      | -4,006  | benign            | 0,239       | Disease    |                   | 5          | DAMAGING | -1,6              | 220        | possibly damaging        |                          |
| P78S        | 78      | -6,23   | possibly damaging | 0,641       | Disease    |                   | 4          | DAMAGING | -1,55             | 455        | probably damaging        |                          |
| A83V        | 83      | -2,927  | possibly damaging | 0,895       | Neutral    |                   | 5          | DAMAGING | -1,56             | 220        | possibly damaging        |                          |
| A83P        | 83      | -3,395  | probably damaging | 0,989       | Disease    |                   | 5          | DAMAGING | -1,58             | 220        | possibly damaging        |                          |
| L84P        | 84      | -5,234  | probably damaging | 0,963       | Disease    |                   | 8          | DAMAGING | -1,66             | 176        | probably begin           |                          |
| E98K        | 98      | -2,512  | possibly damaging | 0,685       | Neutral    |                   | 5          | DAMAGING | -2,25             | 220        | possibly damaging        |                          |
| V106A       | 106     | -3,466  | probably damaging | 0,995       | Disease    |                   | 3          | DAMAGING | -2,3              | 220        | possibly damaging        |                          |
| G107R       | 107     | -4,75   | probably damaging | 0,969       | Disease    |                   | 4          | DAMAGING | -2,27             | 91         | probably begin           |                          |
| G114C       | 114     | -8,588  | probably damaging | 1           | Disease    |                   | 9          | DAMAGING | -1,93             | 456        | probably damaging        |                          |
| R116C       | 116     | -6,801  | probably damaging | 1           | Disease    |                   | 9          | DAMAGING | -1,98             | 455        | probably damaging        |                          |
| I117R       | 117     | -2,834  | probably damaging | 0,997       | Disease    |                   | 6          | DAMAGING | -1,98             | 91         | probably begin           |                          |
| E123K       | 123     | -2,508  | possibly damaging | 0,587       | Disease    |                   | 7          | DAMAGING | -1,77             | 176        | probably begin           |                          |
| L134F       | 134     | -2,607  | possibly damaging | 0,828       | Neutral    |                   | 9          | DAMAGING | -1,58             | 324        | possibly damaging        |                          |
| Y147C       | 147     | -8,465  | probably damaging | 1           | Disease    |                   | 4          | DAMAGING | -2,43             | 455        | probably damaging        |                          |
| A150T       | 150     | -3,575  | probably damaging | 1           | Disease    |                   | 8          | DAMAGING | -2,83             | 456        | probably damaging        |                          |
| T154I       | 154     | -5,764  | probably damaging | 1           | Disease    |                   | 7          | DAMAGING | -3,03             | 456        | probably damaging        |                          |
| A155V       | 155     | -3,743  | probably damaging | 1           | Disease    |                   | 3          | DAMAGING | -2                | 361        | possibly damaging        |                          |
| D168Y       | 168     | -6,603  | probably damaging | 1           | Disease    |                   | 3          | DAMAGING | -1,96             | 361        | possibly damaging        |                          |
| S173Y       | 173     | -5,294  | probably damaging | 1           | Disease    |                   | 2          | DAMAGING | -2,47             | 455        | probably damaging        |                          |
| R174W       | 174     | -6,314  | probably damaging | 1           | Disease    |                   | 3          | DAMAGING | -1,89             | 324        | possibly damaging        |                          |
| H178Y       | 178     | -4,388  | probably damaging | 0,998       | Disease    |                   | 5          | DAMAGING | -2,53             | 456        | probably damaging        |                          |
| Q202*       | 202     | None    | None              | None        | None       | None              |            |          |                   |            | RENAL TUBULAR DYSGENESIS |                          |
| S206F       | 206     | -4,754  | probably damaging | 1           | Disease    |                   | 5          | DAMAGING | -1,97             | 176        | probably begin           |                          |
| T207M       | 207     | -4,051  | probably damaging | 1           | Neutral    |                   | 0          | DAMAGING | -1,82             | 220        | possibly damaging        |                          |
| V209A       | 209     | -2,625  | possibly damaging | 0,873       | Neutral    |                   | 3          | DAMAGING | -1,76             | 220        | possibly damaging        |                          |
| P215L       | 215     | -8,911  | probably damaging | 1           | Neutral    |                   | 0          | DAMAGING | -2,32             | 361        | possibly damaging        |                          |
| L219Q       | 219     | -5,367  | probably damaging | 1           | Disease    |                   | 5          | DAMAGING | -2,16             | 456        | probably damaging        |                          |
| Q225P       | 225     | -3,837  | possibly damaging | 0,905       | Disease    |                   | 3          | DAMAGING | -2,33             | 176        | probably begin           |                          |
| P232L       | 232     | -5,856  | probably damaging | 0,993       | Disease    |                   | 5          | DAMAGING | -2,28             | 176        | probably begin           |                          |
| R237C       | 237     | -6,783  | probably damaging | 1           | Disease    |                   | 5          | DAMAGING | -1,93             | 455        | probably damaging        |                          |
| T242I       | 242     | -4,38   | possibly damaging | 0,884       | Disease    |                   | 3          | DAMAGING | -1,91             | 324        | possibly damaging        |                          |
| A248V       | 248     | -3,115  | probably damaging | 0,985       | Disease    |                   | 2          | DAMAGING | -1,87             | 324        | possibly damaging        |                          |
| A257V       | 257     | -3,52   | probably damaging | 0,995       | Disease    |                   | 1          | DAMAGING | -1,87             | 324        | possibly damaging        |                          |
| V258M       | 258     | -1,796  | probably damaging | 0,999       | Disease    |                   | 1          | DAMAGING | -1,83             | 220        | possibly damaging        |                          |
| W261R       | 261     | -9,099  | probably damaging | 0,999       | Disease    |                   | 5          | DAMAGING | -2,21             | 324        | possibly damaging        |                          |
| D273G       | 273     | -3,428  | benign            | 0,012       | Disease    |                   | 4          | DAMAGING | -2,45             | 220        | possibly damaging        |                          |
| Y281N       | 281     | -4,826  | probably damaging | 1           | Disease    |                   | 7          | DAMAGING | -1,86             | 455        | probably damaging        |                          |
| Y281C       | 281     | -5,582  | probably damaging | 1           | Disease    |                   | 6          | DAMAGING | -1,88             | 455        | probably damaging        |                          |
| H283L       | 283     | -7,694  | probably damaging | 0,998       | Disease    |                   | 8          | DAMAGING | -1,77             | 176        | probably begin           |                          |
| S307L       | 307     | -3,772  | possibly damaging | 0,795       | Disease    |                   | 3          | DAMAGING | -1,94             | 176        | probably begin           |                          |
| V310L       | 310     | -2,685  | probably damaging | 0,994       | Disease    |                   | 7          | DAMAGING | -3,1              | 361        | possibly damaging        |                          |
| F319L       | 319     | -5,322  | probably damaging | 1           | Neutral    |                   | 2          | DAMAGING | -1,91             | 361        | possibly damaging        |                          |
| W322R       | 322     | -7,61   | benign            | 0,035       | Disease    |                   | 4          | DAMAGING | -2,23             | 220        | possibly damaging        |                          |
| P335S       | 335     | -7,108  | probably damaging | 1           | Disease    |                   | 4          | DAMAGING | -2,42             | 456        | probably damaging        |                          |
| I345S       | 345     | -4,944  | probably damaging | 0,998       | Disease    |                   | 6          | DAMAGING | -2,58             | 176        | probably begin           |                          |
| Q346H       | 346     | -4,211  | probably damaging | 0,998       | Disease    |                   | 8          | DAMAGING | -1,84             | 176        | probably begin           |                          |
| P347L       | 347     | -8,81   | probably damaging | 1           | Disease    |                   | 7          | DAMAGING | -4,87             | 456        | probably damaging        |                          |
| H348Y       | 348     | -2,629  | possibly damaging | 0,846       | Disease    |                   | 4          | DAMAGING | -1,82             | 176        | probably begin           |                          |
| D352N       | 352     | -3,316  | benign            | 0,038       | Disease    |                   | 1          | DAMAGING | -2,27             | 220        | possibly damaging        |                          |
| L353V       | 353     | -2,535  | probably damaging | 0,999       | Disease    |                   | 7          | DAMAGING | -2,24             | 456        | probably damaging        |                          |
| P374T       | 374     | -6,317  | probably damaging | 0,967       | Neutral    |                   | 9          | DAMAGING | -1,79             | 324        | possibly damaging        |                          |
| R375Q       | 375     | -3,573  | probably damaging | 1           | Disease    |                   | 2          | DAMAGING | -1,81             | 455        | probably damaging        | RENAL TUBULAR DYSGENESIS |
| R375W       | 375     | -7,016  | probably damaging | 1           | Disease    |                   | 6          | DAMAGING | -1,92             | 455        | probably damaging        | RENAL TUBULAR DYSGENESIS |
| M381R       | 381     | -4,232  | probably damaging | 0,997       | Disease    |                   | 4          | DAMAGING | -2,37             | 91         | probably begin           |                          |
| P382A       | 382     | -7,016  | probably damaging | 1           | Disease    |                   | 5          | DAMAGING | -5,12             | 456        | probably damaging        |                          |
| L395V       | 395     | -2,566  | probably damaging | 0,985       | Neutral    |                   | 1          | DAMAGING | -1,67             | 324        | possibly damaging        |                          |
| S415T       | 415     | -2,61   | probably damaging | 0,995       | Neutral    |                   | 6          | DAMAGING | -1,93             | 455        | probably damaging        |                          |
| S415G       | 415     | -2,883  | possibly damaging | 0,754       | Neutral    |                   | 5          | DAMAGING | -2,07             | 455        | probably damaging        |                          |
| V421A       | 421     | -3,238  | probably damaging | 0,998       | Disease    |                   | 6          | DAMAGING | -2,21             | 324        | possibly damaging        |                          |
| V421M       | 421     | -2,206  | probably damaging | 1           | Disease    |                   | 8          | DAMAGING | -2,26             | 324        | possibly damaging        |                          |
| V424M       | 424     | -2,598  | probably damaging | 1           | Disease    |                   | 6          | DAMAGING | -2,2              | 324        | possibly damaging        |                          |
| S442F       | 442     | -3,718  | probably damaging | 0,996       | Disease    |                   | 4          | DAMAGING | -1,91             | 176        | probably begin           |                          |
| R458C       | 458     | -2,962  | probably damaging | 0,996       | Disease    |                   | 9          | DAMAGING | -2,73             | 91         | probably begin           |                          |
| L461V       | 461     | -2,617  | probably damaging | 0,999       | Disease    |                   | 8          | DAMAGING | -2,11             | 361        | possibly damaging        |                          |
| A471V       | 471     | -2,862  | probably damaging | 0,975       | Disease    |                   | 6          | DAMAGING | -1,83             | 176        | probably begin           |                          |
| H473N       | 473     | -4,22   | possibly damaging | 0,722       | Disease    |                   | 6          | DAMAGING | -1,81             | 176        | probably begin           |                          |
| R477H       | 477     | -4,037  | probably damaging | 1           | Disease    |                   | 9          | DAMAGING | -2,02             | 455        | probably damaging        |                          |

Damaging SNPs - Angiotensinogen

| SNP Details |         | Provean | PolyPhen-2 |             | PhD-SNP    |                   | FATHMM     |       | PANTHER-PSEP      |            | HUMA               |
|-------------|---------|---------|------------|-------------|------------|-------------------|------------|-------|-------------------|------------|--------------------|
| SNP         | Seq Pos | Score   | Prediction | Probability | Prediction | Reliability Index | Prediction | Score | Preservation Time | Prediction | Associated Disease |

\* SNPs were predicted to be damaging if at least 4 out of the 5 tools agreed or they if they were associated with a disease in HUMA

| Position   | Position (PDB) | Residue    |
|------------|----------------|------------|
| 36         | 337            | VAL        |
| 37         | 338            | TYR        |
| 38         | 339            | ILE        |
| <b>39</b>  | <b>340</b>     | <b>HIS</b> |
| <b>40</b>  | <b>341</b>     | <b>PRO</b> |
| 41         | 342            | PHE        |
| 42         | 343            | HIS        |
| <b>43</b>  | <b>344</b>     | <b>LEU</b> |
| <b>44</b>  | <b>345</b>     | <b>VAL</b> |
| 45         | 346            | ILE        |
| <b>48</b>  | <b>349</b>     | <b>GLU</b> |
| <b>49</b>  | <b>350</b>     | <b>SER</b> |
| 52         | 353            | GLU        |
| 101        | 402            | LEU        |
| <b>104</b> | <b>405</b>     | <b>ALA</b> |
| <b>105</b> | <b>406</b>     | <b>MET</b> |
| 108        | 409            | MET        |
| 109        | 410            | LEU        |
| 112        | 413            | PHE        |
| 160        | 461            | ALA        |
| <b>161</b> | <b>462</b>     | <b>ILE</b> |
| <b>164</b> | <b>465</b>     | <b>VAL</b> |
| 165        | 466            | PRO        |
| <b>168</b> | <b>469</b>     | <b>ASP</b> |
| 400        | 701            | GLU        |

\* SNPs occur at positions highlighted in yellow

\*\* Damaging SNPs occur at positions highlighted in red

\*\*\* The "Position (PDB)" column refers to the numbering in the PDB file
