# Supplementary material
Source: PubMed Central journal article supplement (PMC5583000)
Supplement: NIHMS846845-supplement-2.pdf [file NIHMS846845-supplement-2.pdf]

All SNPs - Renin

| #SNP  | Seq pos | Provean | PPH2              | PPH2 prob | PhD-SNP | PhD-SNP RI | FATHMM    | FATHMM score | HUMA (Disease associated?) |
|-------|---------|---------|-------------------|-----------|---------|------------|-----------|--------------|----------------------------|
| G3E   | 3       | 0,152   | benign            | 0         | Neutral | 5          | TOLERATED | 0,02         |                            |
| R5G   | 5       | -0,357  | benign            | 0,002     | Neutral | 4          | TOLERATED | 0,09         |                            |
| R6K   | 6       | -0,367  | benign            | 0         | Neutral | 7          | TOLERATED | 0,08         |                            |
| M7L   | 7       | -1,01   | benign            | 0,001     | Disease | 2          | TOLERATED | 0,31         |                            |
| P8A   | 8       | -1,375  | benign            | 0,003     | Disease | 1          | TOLERATED | 0,22         |                            |
| R9H   | 9       | -0,631  | benign            | 0,008     | Neutral | 5          | TOLERATED | 0,08         |                            |
| L16R  | 16      | -1,851  | possibly damaging | 0,754     | Disease | 6          | TOLERATED | -0,08        | HYPERURICEMIC NEPHROPATHY  |
| L24F  | 24      | -0,968  | benign            | 0,326     | Neutral | 1          | TOLERATED | -0,07        |                            |
| P25L  | 25      | -3,037  | benign            | 0,186     | Disease | 4          | TOLERATED | 0,15         |                            |
| T28N  | 28      | -0,793  | possibly damaging | 0,514     | Neutral | 5          | TOLERATED | 0,13         |                            |
| T29N  | 29      | 0,259   | benign            | 0,05      | Neutral | 7          | TOLERATED | 0,13         |                            |
| K32T  | 32      | -1,199  | benign            | 0,053     | Neutral | 9          | TOLERATED | 0,45         |                            |
| R33Q  | 33      | -2,95   | probably damaging | 1         | Disease | 7          | TOLERATED | 0,1          |                            |
| R33W  | 33      | -5,675  | probably damaging | 1         | Disease | 8          | TOLERATED | -0,04        |                            |
| R43*  | 43      | None    | None              | None      | None    | None       |           |              | RENAL TUBULAR DYSGENESIS   |
| E48D  | 48      | -1,605  | benign            | 0,364     | Disease | 3          | TOLERATED | 0,06         |                            |
| R49*  | 49      | None    | None              | None      | None    | None       |           |              | RENAL TUBULAR DYSGENESIS   |
| R49Q  | 49      | -0,701  | possibly damaging | 0,806     | Neutral | 3          | TOLERATED | 1,02         |                            |
| D52H  | 52      | -1,409  | benign            | 0,066     | Neutral | 2          | TOLERATED | 0,91         |                            |
| R55T  | 55      | -1,6    | benign            | 0,409     | Disease | 1          | TOLERATED | 0,97         |                            |
| G57S  | 57      | -0,146  | benign            | 0,004     | Disease | 2          | TOLERATED | 0,43         |                            |
| E59K  | 59      | -2,02   | benign            | 0,021     | Neutral | 3          | TOLERATED | 0,44         |                            |
| W60R  | 60      | -2,435  | benign            | 0         | Neutral | 3          | TOLERATED | 0,49         |                            |
| R66M  | 66      | -1,23   | benign            | 0,032     | Neutral | 5          | TOLERATED | 0,32         |                            |
| G70D  | 70      | -1,986  | benign            | 0         | Disease | 4          | TOLERATED | 0,38         |                            |
| N71D  | 71      | -3,045  | benign            | 0         | Neutral | 5          | TOLERATED | 0,44         |                            |
| T72N  | 72      | 0,744   | benign            | 0         | Neutral | 5          | TOLERATED | 0,47         |                            |
| T73N  | 73      | -3,081  | benign            | 0,081     | Neutral | 2          | TOLERATED | 0,41         |                            |
| V76M  | 76      | -1,191  | possibly damaging | 0,894     | Disease | 2          | TOLERATED | 0,27         |                            |
| I77M  | 77      | -1,1    | benign            | 0,134     | Disease | 1          | TOLERATED | 0,37         |                            |
| T79S  | 79      | -2,884  | possibly damaging | 0,459     | Neutral | 8          | TOLERATED | 0,42         |                            |
| M82K  | 82      | -2,574  | benign            | 0,01      | Disease | 6          | TOLERATED | 0,41         |                            |
| T84N  | 84      | -3,51   | possibly damaging | 0,459     | Neutral | 2          | TOLERATED | 0,31         |                            |
| Y86C  | 86      | -8,365  | probably damaging | 1         | Disease | 7          | TOLERATED | -1,35        |                            |
| Y87H  | 87      | -4,34   | probably damaging | 1         | Disease | 4          | TOLERATED | 0,24         |                            |
| E89K  | 89      | -3,58   | probably damaging | 0,997     | Disease | 3          | TOLERATED | 0,33         |                            |
| I90T  | 90      | -4,618  | probably damaging | 1         | Disease | 5          | TOLERATED | -0,21        |                            |
| P96H  | 96      | -4,923  | probably damaging | 1         | Disease | 6          | TOLERATED | 0,05         |                            |
| V101I | 101     | -0,931  | probably damaging | 0,997     | Neutral | 1          | TOLERATED | -0,17        |                            |
| D104N | 104     | -4,653  | probably damaging | 1         | Disease | 6          | DAMAGING  | -1,83        | RENAL TUBULAR DYSGENESIS   |
| S108A | 108     | 0,941   | benign            | 0,085     | Disease | 1          | TOLERATED | -0,09        |                            |
| R119H | 119     | -0,296  | possibly damaging | 0,915     | Neutral | 7          | TOLERATED | 0,4          |                            |
| R119C | 119     | -1,058  | probably damaging | 0,963     | Neutral | 7          | TOLERATED | 0,4          |                            |
| T122A | 122     | -1,738  | benign            | 0         | Neutral | 6          | TOLERATED | 0,41         |                            |
| Y126C | 126     | -0,57   | possibly damaging | 0,506     | Neutral | 5          | TOLERATED | 0,39         |                            |
| H127R | 127     | -7,29   | probably damaging | 0,984     | Disease | 5          | TOLERATED | 0,29         |                            |
| L129F | 129     | -1,672  | benign            | 0,269     | Neutral | 0          | TOLERATED | 0,32         |                            |
| S133L | 133     | -4,375  | benign            | 0,023     | Disease | 2          | TOLERATED | 0,18         |                            |
| S135Y | 135     | -5,549  | probably damaging | 1         | Disease | 8          | TOLERATED | -1,46        | RENAL TUBULAR DYSGENESIS   |
| S136P | 136     | -2,991  | benign            | 0,054     | Disease | 7          | TOLERATED | -0,19        |                            |
| K139* | 139     | None    | None              | None      | None    | None       |           |              |                            |
| N141S | 141     | -4,334  | benign            | 0,035     | Disease | 2          | TOLERATED | 0,35         |                            |
| E144Q | 144     | -1,037  | benign            | 0,002     | Neutral | 7          | TOLERATED | 0,34         |                            |
| T146P | 146     | -2,197  | benign            | 0,001     | Disease | 7          | TOLERATED | 0,33         |                            |
| R148C | 148     | -3,89   | possibly damaging | 0,852     | Neutral | 4          | TOLERATED | 0,32         |                            |
| R148H | 148     | -0,157  | benign            | 0         | Neutral | 5          | TOLERATED | 0,38         |                            |
| Q160K | 160     | -3,211  | benign            | 0,005     | Disease | 7          | TOLERATED | 0,38         |                            |
| Q160R | 160     | -3,329  | benign            | 0,003     | Disease | 2          | TOLERATED | 0,3          |                            |
| D161G | 161     | -6,432  | possibly damaging | 0,854     | Disease | 5          | TOLERATED | -0,92        |                            |
| I162T | 162     | -1,852  | benign            | 0         | Neutral | 8          | TOLERATED | 0,74         |                            |
| T164N | 164     | -3,169  | benign            | 0,005     | Neutral | 4          | TOLERATED | 0,23         |                            |
| G167E | 167     | -3,792  | probably damaging | 0,986     | Disease | 5          | TOLERATED | 0,08         |                            |
| T169M | 169     | -2,077  | possibly damaging | 0,87      | Disease | 6          | TOLERATED | 0,23         |                            |
| T178M | 178     | -4,434  | probably damaging | 0,996     | Neutral | 4          | TOLERATED | 0,18         |                            |
| M180T | 180     | -2,734  | benign            | 0,062     | Neutral | 2          | TOLERATED | 0,45         |                            |
| M186I | 186     | -0,053  | benign            | 0         | Neutral | 4          | TOLERATED | 0,45         |                            |
| A188V | 188     | -3,581  | probably damaging | 1         | Disease | 6          | TOLERATED | 0,22         |                            |
| E189K | 189     | 2,188   | benign            | 0,005     | Neutral | 6          | TOLERATED | 0,48         |                            |
| G195D | 195     | -6,716  | probably damaging | 1         | Disease | 7          | DAMAGING  | -3,3         |                            |
| I199T | 199     | 1,606   | benign            | 0         | Neutral | 2          | TOLERATED | 0,51         |                            |
| A202T | 202     | -2,822  | probably damaging | 1         | Disease | 6          | TOLERATED | 0,31         |                            |
| P208S | 208     | -7,728  | probably damaging | 1         | Disease | 3          | TOLERATED | 0,24         |                            |

| #SNP  | Seq pos | Provean | PPH2              | PPH2 prob | PhD-SNP | PhD-SNP RI | FATHMM    | FATHMM score | HUMA (Disease associated?) |
|-------|---------|---------|-------------------|-----------|---------|------------|-----------|--------------|----------------------------|
| N212S | 212     | -2,526  | benign            | 0,451     | Disease | 8          | TOLERATED | 0,32         |                            |
| I214V | 214     | -0,601  | benign            | 0,038     | Neutral | 9          | TOLERATED | 0,48         |                            |
| S215Y | 215     | -4,842  | possibly damaging | 0,645     | Disease | 1          | TOLERATED | 0,23         |                            |
| G217R | 217     | 0,792   | benign            | 0,077     | Disease | 2          | TOLERATED | -0,09        |                            |
| V218L | 218     | -1,833  | benign            | 0         | Neutral | 6          | TOLERATED | 0,57         |                            |
| R230K | 230     | -2,719  | possibly damaging | 0,576     | Disease | 4          | TOLERATED | 0,35         | RENAL TUBULAR DYSGENESIS   |
| D231N | 231     | 0,018   | benign            | 0         | Neutral | 1          | TOLERATED | 0,41         |                            |
| D231V | 231     | -3,273  | benign            | 0,058     | Disease | 7          | TOLERATED | 0,25         |                            |
| D231E | 231     | -0,895  | benign            | 0,022     | Disease | 2          | TOLERATED | 0,41         |                            |
| E233K | 233     | -0,146  | benign            | 0,001     | Disease | 4          | TOLERATED | 0,38         |                            |
| Q236P | 236     | 2,153   | benign            | 0,002     | Disease | 1          | TOLERATED | 0,05         |                            |
| S237L | 237     | 0,704   | benign            | 0,262     | Disease | 2          | TOLERATED | 0,33         |                            |
| G240R | 240     | -6,699  | probably damaging | 1         | Disease | 8          | TOLERATED | -0,57        |                            |
| Y252H | 252     | -4,061  | probably damaging | 0,998     | Disease | 5          | TOLERATED | 0,08         |                            |
| E253K | 253     | -0,29   | benign            | 0,114     | Neutral | 0          | TOLERATED | 0,48         |                            |
| F256L | 256     | -5,042  | possibly damaging | 0,719     | Neutral | 5          | TOLERATED | 0,68         |                            |
| H257R | 257     | -5,386  | probably damaging | 0,991     | Disease | 3          | TOLERATED | 0,41         |                            |
| H257Q | 257     | -5,123  | probably damaging | 0,971     | Disease | 1          | TOLERATED | 0,42         |                            |
| Y258F | 258     | -3,395  | possibly damaging | 0,935     | Disease | 7          | TOLERATED | 0,25         |                            |
| I262T | 262     | 2,221   | benign            | 0,007     | Neutral | 8          | TOLERATED | 0,56         |                            |
| K263R | 263     | -0,452  | benign            | 0         | Neutral | 3          | TOLERATED | 0,47         |                            |
| M271T | 271     | -4,788  | probably damaging | 0,998     | Disease | 4          | TOLERATED | 0,29         |                            |
| G273R | 273     | -6,483  | probably damaging | 1         | Disease | 3          | TOLERATED | 0,17         |                            |
| V274L | 274     | -2,305  | benign            | 0,36      | Disease | 2          | TOLERATED | 0,22         |                            |
| L281F | 281     | -3,146  | benign            | 0,067     | Neutral | 2          | TOLERATED | 0,22         |                            |
| L282F | 282     | 1,325   | benign            | 0,009     | Neutral | 7          | TOLERATED | 0,44         |                            |
| G286S | 286     | -5,686  | probably damaging | 1         | Disease | 9          | TOLERATED | 0,27         |                            |
| T293N | 293     | -4,729  | probably damaging | 1         | Disease | 2          | TOLERATED | -0,45        |                            |
| T302I | 302     | -2,751  | probably damaging | 0,96      | Neutral | 4          | TOLERATED | 0,27         |                            |
| E306K | 306     | 0,588   | benign            | 0         | Disease | 1          | TOLERATED | 0,38         |                            |
| L308I | 308     | -1,523  | benign            | 0,03      | Neutral | 4          | TOLERATED | 0,57         |                            |
| L318R | 318     | 0,957   | benign            | 0         | Disease | 3          | TOLERATED | 0,44         |                            |
| F319V | 319     | 0,509   | benign            | 0,009     | Disease | 3          | TOLERATED | 0,42         |                            |
| D320H | 320     | -2,581  | possibly damaging | 0,916     | Disease | 1          | TOLERATED | 0,37         |                            |
| Y321* | 321     | None    | None              | None      | None    | None       |           |              |                            |
| V323M | 323     | -2,757  | probably damaging | 1         | Disease | 5          | TOLERATED | 0,02         |                            |
| K324R | 324     | -0,901  | benign            | 0,317     | Neutral | 7          | TOLERATED | 0,4          |                            |
| N326D | 326     | 0,498   | benign            | 0         | Neutral | 5          | TOLERATED | 0,47         |                            |
| D333N | 333     | -1,084  | benign            | 0,384     | Neutral | 2          | TOLERATED | 0,39         |                            |
| H337Y | 337     | -4,252  | benign            | 0,04      | Disease | 1          | TOLERATED | 0,38         |                            |
| G340V | 340     | -8,006  | probably damaging | 1         | Disease | 6          | TOLERATED | -0,23        |                            |
| T344M | 344     | -3,425  | probably damaging | 1         | Disease | 3          | TOLERATED | 0,27         |                            |
| L345F | 345     | -3,82   | probably damaging | 1         | Disease | 6          | TOLERATED | 0,08         |                            |
| F352I | 352     | 1,384   | benign            | 0,008     | Neutral | 2          | TOLERATED | 0,5          |                            |
| E354G | 354     | -3,189  | benign            | 0,15      | Neutral | 2          | TOLERATED | 0,3          |                            |
| S358I | 358     | -3,823  | possibly damaging | 0,788     | Neutral | 1          | TOLERATED | 0,28         |                            |
| L364P | 364     | -3,556  | probably damaging | 0,989     | Disease | 5          | TOLERATED | 0,1          |                            |
| P372L | 372     | -8,028  | probably damaging | 0,983     | Disease | 6          | TOLERATED | 0,28         |                            |
| P373L | 373     | -8,269  | probably damaging | 0,99      | Disease | 6          | TOLERATED | 0,28         |                            |
| T375N | 375     | -2,552  | benign            | 0,127     | Neutral | 7          | TOLERATED | 0,39         |                            |
| T384A | 384     | -1,98   | benign            | 0,448     | Neutral | 6          | TOLERATED | 0,42         |                            |
| T384N | 384     | -1,948  | benign            | 0,128     | Disease | 1          | TOLERATED | 0,39         |                            |
| I386T | 386     | -4,668  | probably damaging | 0,971     | Disease | 4          | TOLERATED | 0,15         |                            |
| R387Q | 387     | -1,243  | probably damaging | 0,987     | Disease | 5          | TOLERATED | 0,16         |                            |
| R387* | 387     | None    | None              | None      | None    | None       |           |              |                            |
| Y390H | 390     | -4,697  | probably damaging | 1         | Neutral | 2          | TOLERATED | -0,18        |                            |
| R395L | 395     | -6,282  | probably damaging | 0,986     | Neutral | 3          | TOLERATED | 0,54         |                            |
| R396C | 396     | -5,15   | possibly damaging | 0,886     | Neutral | 3          | TOLERATED | 0,36         |                            |
| N398D | 398     | -4,158  | benign            | 0,356     | Neutral | 1          | TOLERATED | 0,36         |                            |
| R399C | 399     | -7,247  | probably damaging | 1         | Disease | 6          | TOLERATED | 0,15         |                            |
| R399H | 399     | -4,43   | probably damaging | 1         | Disease | 5          | TOLERATED | 0,17         |                            |
| R406H | 406     | -1,982  | probably damaging | 1         | Disease | 5          | TOLERATED | -0,11        |                            |
| R406C | 406     | -2,183  | probably damaging | 1         | Disease | 7          | TOLERATED | -0,15        |                            |

Damaging SNPs - Renin

| #SNP  | Seq pos | Provean | PPH2              | PPH2 prob | PhD-SNP | PhD-SNP RI | FATHMM          | FATHMM score | HUMA (Disease associated?)       |
|-------|---------|---------|-------------------|-----------|---------|------------|-----------------|--------------|----------------------------------|
| L16R  | 16      | -1,851  | possibly damaging | 0,754     | Disease | 6          | TOLERATED       | -0,08        | <b>HYPERURICEMIC NEPHROPATHY</b> |
| R33Q  | 33      | -2,95   | probably damaging | 1         | Disease | 7          | TOLERATED       | 0,1          |                                  |
| R33W  | 33      | -5,675  | probably damaging | 1         | Disease | 8          | TOLERATED       | -0,04        |                                  |
| R43*  | 43      |         |                   |           |         |            |                 |              | <b>RENAL TUBULAR DYSGENESIS</b>  |
| R49*  | 49      |         |                   |           |         |            |                 |              | <b>RENAL TUBULAR DYSGENESIS</b>  |
| Y86C  | 86      | -8,365  | probably damaging | 1         | Disease | 7          | TOLERATED       | -1,35        |                                  |
| Y87H  | 87      | -4,34   | probably damaging | 1         | Disease | 4          | TOLERATED       | 0,24         |                                  |
| E89K  | 89      | -3,58   | probably damaging | 0,997     | Disease | 3          | TOLERATED       | 0,33         |                                  |
| I90T  | 90      | -4,618  | probably damaging | 1         | Disease | 5          | TOLERATED       | -0,21        |                                  |
| P96H  | 96      | -4,923  | probably damaging | 1         | Disease | 6          | TOLERATED       | 0,05         |                                  |
| D104N | 104     | -4,653  | probably damaging | 1         | Disease | 6          | <b>DAMAGING</b> | <b>-1,83</b> | <b>RENAL TUBULAR DYSGENESIS</b>  |
| H127R | 127     | -7,29   | probably damaging | 0,984     | Disease | 5          | TOLERATED       | 0,29         |                                  |
| S135Y | 135     | -5,549  | probably damaging | 1         | Disease | 8          | TOLERATED       | -1,46        | <b>RENAL TUBULAR DYSGENESIS</b>  |
| D161G | 161     | -6,432  | possibly damaging | 0,854     | Disease | 5          | TOLERATED       | -0,92        |                                  |
| G167E | 167     | -3,792  | probably damaging | 0,986     | Disease | 5          | TOLERATED       | 0,08         |                                  |
| A188V | 188     | -3,581  | probably damaging | 1         | Disease | 6          | TOLERATED       | 0,22         |                                  |
| G195D | 195     | -6,716  | probably damaging | 1         | Disease | 7          | <b>DAMAGING</b> | <b>-3,3</b>  |                                  |
| A202T | 202     | -2,822  | probably damaging | 1         | Disease | 6          | TOLERATED       | 0,31         |                                  |
| P208S | 208     | -7,728  | probably damaging | 1         | Disease | 3          | TOLERATED       | 0,24         |                                  |
| S215Y | 215     | -4,842  | possibly damaging | 0,645     | Disease | 1          | TOLERATED       | 0,23         |                                  |
| R230K | 230     | -2,719  | possibly damaging | 0,576     | Disease | 4          | TOLERATED       | 0,35         | <b>RENAL TUBULAR DYSGENESIS</b>  |
| G240R | 240     | -6,699  | probably damaging | 1         | Disease | 8          | TOLERATED       | -0,57        |                                  |
| Y252H | 252     | -4,061  | probably damaging | 0,998     | Disease | 5          | TOLERATED       | 0,08         |                                  |
| H257R | 257     | -5,386  | probably damaging | 0,991     | Disease | 3          | TOLERATED       | 0,41         |                                  |
| H257Q | 257     | -5,123  | probably damaging | 0,971     | Disease | 1          | TOLERATED       | 0,42         |                                  |
| Y258F | 258     | -3,395  | possibly damaging | 0,935     | Disease | 7          | TOLERATED       | 0,25         |                                  |
| M271T | 271     | -4,788  | probably damaging | 0,998     | Disease | 4          | TOLERATED       | 0,29         |                                  |
| G273R | 273     | -6,483  | probably damaging | 1         | Disease | 3          | TOLERATED       | 0,17         |                                  |
| G286S | 286     | -5,686  | probably damaging | 1         | Disease | 9          | TOLERATED       | 0,27         |                                  |
| T293N | 293     | -4,729  | probably damaging | 1         | Disease | 2          | TOLERATED       | -0,45        |                                  |
| D320H | 320     | -2,581  | possibly damaging | 0,916     | Disease | 1          | TOLERATED       | 0,37         |                                  |
| V323M | 323     | -2,757  | probably damaging | 1         | Disease | 5          | TOLERATED       | 0,02         |                                  |
| G340V | 340     | -8,006  | probably damaging | 1         | Disease | 6          | TOLERATED       | -0,23        |                                  |
| T344M | 344     | -3,425  | probably damaging | 1         | Disease | 3          | TOLERATED       | 0,27         |                                  |
| L345F | 345     | -3,82   | probably damaging | 1         | Disease | 6          | TOLERATED       | 0,08         |                                  |
| L364P | 364     | -3,556  | probably damaging | 0,989     | Disease | 5          | TOLERATED       | 0,1          |                                  |
| P372L | 372     | -8,028  | probably damaging | 0,983     | Disease | 6          | TOLERATED       | 0,28         |                                  |
| P373L | 373     | -8,269  | probably damaging | 0,99      | Disease | 6          | TOLERATED       | 0,28         |                                  |
| I386T | 386     | -4,668  | probably damaging | 0,971     | Disease | 4          | TOLERATED       | 0,15         |                                  |
| R399C | 399     | -7,247  | probably damaging | 1         | Disease | 6          | TOLERATED       | 0,15         |                                  |
| R399H | 399     | -4,43   | probably damaging | 1         | Disease | 5          | TOLERATED       | 0,17         |                                  |

\* SNPs were predicted to be damaging if at least 3 out of the 4 tools agreed or they if they were associated with a disease in HUMA

| Position   | Position (PDB) | Residue    |
|------------|----------------|------------|
| <b>82</b>  | <b>9</b>       | <b>MET</b> |
| 85         | 12             | GLN        |
| 102        | 29             | VAL        |
| <b>104</b> | <b>31</b>      | <b>ASP</b> |
| 106        | 33             | GLY        |
| <b>119</b> | <b>46</b>      | <b>ARG</b> |
| 120        | 47             | LEU        |
| 121        | 48             | TYR        |
| <b>148</b> | <b>75</b>      | <b>ARG</b> |
| 149        | 76             | TYR        |
| 150        | 77             | SER        |
| 151        | 78             | THR        |
| 153        | 80             | THR        |
| 181        | 108            | PRO        |
| 182        | 109            | ALA        |
| 183        | 110            | LEU        |
| 184        | 111            | PRO        |
| 185        | 112            | PHE        |
| <b>186</b> | <b>113</b>     | <b>MET</b> |
| 187        | 114            | LEU        |
| <b>188</b> | <b>115</b>     | <b>ALA</b> |
| 190        | 117            | PHE        |
| 193        | 120            | VAL        |
| 203        | 130            | ILE        |
| 290        | 217            | LEU        |
| 292        | 219            | ASP        |
| 295        | 222            | ALA        |
| 296        | 223            | SER        |
| 297        | 224            | TYR        |
| 299        | 226            | SER        |
| <b>318</b> | <b>245</b>     | <b>LEU</b> |
| <b>319</b> | <b>246</b>     | <b>PHE</b> |
| <b>352</b> | <b>279</b>     | <b>PHE</b> |
| 363        | 290            | THR        |
| 371        | 298            | ILE        |
| 380        | 307            | ALA        |

\* SNPs occur at positions highlighted in yellow

\*\* Damaging SNPs occur at positions highlighted in red

\*\*\* The "Position (PDB)" column refers to the numbering in the PDB file
